# Supplementary material for: Molecular laterality encodes stress susceptibility in the medial prefrontal cortex
Source: PubMed Central journal article supplement (PMC8201740; doi:10.1186/s13041-021-00802-w), 2021-06-14
Supplement: 13041_2021_802_MOESM3_ESM.pdf [file 13041_2021_802_MOESM3_ESM.pdf]

**Supplementary table1**

Analysis of DEGs in the two hemispheres of the mPFC in mice with social defeat stress versus non-stressed mice. Significant DEGs with a FDR adjusted *p*-value cutoff of 0.05 are shown. AveExpr, averaged expression of microarray genes; t, moderated t-statistic; B, B-statistic.

**DEGs in Stressed mice**

adj.P.Value &lt; 0.05

DEGup 265

DEGdown 314

| Gene    | logFC      | AveExpr    | t          | P.Value    | adj.P.Val  | B          |
|---------|------------|------------|------------|------------|------------|------------|
| HBA-A1  | 0.84707041 | 12.603948  | 8.7445231  | 7.36E-08   | 3.79E-04   | 8.15152952 |
| HBB-B1  | 0.46623188 | 8.799639   | 5.4034457  | 4.06E-05   | 0.00541842 | 2.3301883  |
| SLA     | 0.45443905 | 8.89092299 | 4.5322105  | 0.00026452 | 0.01484816 | 0.55489898 |
| COL6A1  | 0.35226339 | 9.22545339 | 4.45290944 | 0.00031477 | 0.0158282  | 0.39003821 |
| AHI1    | 0.33521924 | 10.5770826 | 8.36220121 | 1.41E-07   | 0.00037903 | 7.57222957 |
| FDPS    | 0.31547909 | 10.8318761 | 6.49685384 | 4.36E-06   | 2.42E-03   | 4.42350064 |
| SGK1    | 0.31406315 | 11.4479198 | 7.80398581 | 3.74E-07   | 6.59E-04   | 6.68677525 |
| PFDN2   | 0.29616089 | 11.0416885 | 4.55956876 | 0.00024914 | 0.01437426 | 0.61168241 |
| NTSR1   | 0.28754149 | 8.08729358 | 4.66064059 | 0.00019977 | 0.01269972 | 0.82100826 |
| CCDC85B | 0.28441768 | 10.2665489 | 4.81746377 | 0.00014204 | 0.0106406  | 1.14421177 |
| CRYM    | 0.27706991 | 11.5469814 | 5.04613119 | 8.67E-05   | 0.00874856 | 1.61144447 |
| CDH13   | 0.2708336  | 8.43969677 | 8.34963357 | 1.44E-07   | 0.00037903 | 7.55281646 |
| RASL10A | 0.26866073 | 9.58820196 | 7.19824142 | 1.14E-06   | 1.27E-03   | 5.67128602 |
| FEZF2   | 0.26701969 | 9.72472105 | 6.27530904 | 6.77E-06   | 0.00259952 | 4.01348915 |
| GRP     | 0.26655555 | 8.92596053 | 4.29526966 | 0.00044531 | 0.01910341 | 0.0613068  |
| COL5A1  | 0.26414787 | 8.05294259 | 6.75563963 | 2.63E-06   | 1.84E-03   | 4.89284883 |
| STK32C  | 0.25945005 | 9.13738682 | 4.48840763 | 0.00029118 | 0.01546967 | 0.46388353 |
| FUS     | 0.25826366 | 8.26822029 | 4.379662   | 0.00036977 | 0.01695854 | 0.23744331 |
| RAMP3   | 0.25743935 | 8.3924463  | 6.23155596 | 7.39E-06   | 0.00259952 | 3.93163287 |
| SEZ6    | 0.25585236 | 9.33471543 | 3.83934395 | 0.00122152 | 0.0317664  | -0.8931805 |
| DLG4    | 0.25270207 | 9.49692496 | 5.70235163 | 2.17E-05   | 0.00437931 | 2.91925099 |
| ALAS2   | 0.25225822 | 7.583163   | 3.73460994 | 0.00154087 | 0.0363793  | -1.1122626 |
| PTPRU   | 0.25137647 | 8.32085233 | 4.60333318 | 0.00022639 | 0.01381007 | 0.70241164 |
| KLF16   | 0.2510609  | 8.78199347 | 5.37421553 | 4.31E-05   | 0.00562063 | 2.27196278 |
| LY6A    | 0.24998295 | 9.56547165 | 6.20196164 | 7.84E-06   | 2.67E-03   | 3.87610236 |
| STXBP2  | 0.23797724 | 9.00951879 | 4.43217412 | 0.00032944 | 0.01602116 | 0.34686994 |
| COTL1   | 0.23749955 | 9.64508114 | 5.11537348 | 7.48E-05   | 0.00821991 | 1.75186859 |
| RPS26   | 0.23700543 | 11.8522756 | 5.50287672 | 3.29E-05   | 4.82E-03   | 2.52744135 |
| DPYSL5  | 0.23180537 | 7.95106553 | 4.40045113 | 0.00035324 | 0.01656753 | 0.28078151 |
| DGKG    | 0.22768583 | 10.633969  | 6.37649876 | 5.54E-06   | 2.60E-03   | 4.20169067 |

|             |            |            |            |            |            |            |
|-------------|------------|------------|------------|------------|------------|------------|
| SLC35E3     | 0.22445198 | 9.52768232 | 4.77129674 | 0.00015701 | 0.01069161 | 1.04928006 |
| SUMO3       | 0.22403948 | 9.24110329 | 4.36564893 | 0.00038135 | 0.01734638 | 0.20821882 |
| SAMD14      | 0.22184603 | 9.19400368 | 4.51858052 | 0.00027254 | 0.01500795 | 0.526591   |
| SYT5        | 0.22182225 | 10.3186048 | 5.52716269 | 3.13E-05   | 4.82E-03   | 2.57542667 |
| PRR7        | 0.22168804 | 9.3840363  | 7.06847588 | 1.45E-06   | 1.27E-03   | 5.44624908 |
| STMN4       | 0.22083269 | 9.66088678 | 4.77805956 | 0.00015472 | 0.01069161 | 1.06319789 |
| ENSMUSG00   | 0.21900688 | 7.88298176 | 3.89094426 | 0.00108944 | 0.03017556 | -0.7851365 |
| NRBP2       | 0.218318   | 10.2750614 | 4.85832667 | 0.00013001 | 0.01035803 | 1.22807708 |
| KLF5        | 0.21546766 | 8.79053829 | 4.61367067 | 0.00022134 | 1.36E-02   | 0.72382281 |
| HRMT1L2     | 0.21533176 | 10.4844888 | 6.07342188 | 1.02E-05   | 0.00291503 | 3.63339325 |
| RPS4Y2      | 0.21380394 | 7.95516996 | 5.70384181 | 2.17E-05   | 0.00437931 | 2.92215777 |
| DDAH1       | 0.21379253 | 11.2813149 | 3.65080334 | 0.00185541 | 0.04009013 | -1.2872544 |
| PADI6       | 0.21296523 | 7.45104214 | 3.98994433 | 0.00087477 | 0.02660348 | -0.5777475 |
| VPS25       | 0.21160752 | 8.98146554 | 5.82681103 | 1.68E-05   | 0.00374295 | 3.16096366 |
| ARHGEF15    | 0.21079644 | 8.08675003 | 6.29914158 | 6.46E-06   | 0.00259952 | 4.05795499 |
| NME2        | 0.21061356 | 10.329742  | 4.29698705 | 0.00044363 | 1.91E-02   | 0.06489424 |
| P140        | 0.21041299 | 8.30535316 | 6.01550195 | 1.14E-05   | 3.04E-03   | 3.52322973 |
| ACTR1A      | 0.21020477 | 10.8298495 | 3.73502912 | 0.00153944 | 0.0363793  | -1.1113865 |
| HNRNPK      | 0.20511571 | 8.5206578  | 5.59277992 | 2.73E-05   | 0.00453347 | 2.70468832 |
| KCTD10      | 0.20283557 | 9.086462   | 5.08430976 | 7.99E-05   | 8.51E-03   | 1.68893531 |
| HSPA8       | 0.20017484 | 12.0776926 | 3.6713111  | 0.00177298 | 0.03946587 | -1.2444654 |
| CASC3       | 0.19892698 | 10.0445341 | 4.05915943 | 0.00075042 | 0.02525567 | -0.4327417 |
| GPN3        | 0.19885025 | 8.40650612 | 5.08116857 | 8.05E-05   | 0.00851403 | 1.68256558 |
| MED6        | 0.19817141 | 8.93803399 | 6.7257443  | 2.79E-06   | 1.84E-03   | 4.83916156 |
| ASAH3L      | 0.19808508 | 7.96930731 | 3.58369733 | 0.00215272 | 0.04335436 | -1.4270973 |
| DDR1        | 0.19561391 | 8.7460174  | 4.41669929 | 0.00034084 | 0.01632144 | 0.31463796 |
| 5430437P03I | 0.19478618 | 9.35244513 | 4.61662588 | 0.00021991 | 0.01357163 | 0.72994225 |
| SLC38A5     | 0.19406949 | 8.13011731 | 4.55257755 | 0.00025298 | 0.01450913 | 0.59717655 |
| CXX1C       | 0.19204047 | 10.4289732 | 5.13589761 | 7.16E-05   | 8.03E-03   | 1.79339095 |
| ERP29       | 0.19081977 | 11.3256306 | 4.45423017 | 0.00031386 | 0.0158282  | 0.39278699 |
| FXVD6       | 0.19034592 | 12.8022387 | 3.60980779 | 0.00203179 | 0.04195989 | -1.3727188 |
| ZYX         | 0.1874176  | 11.0047353 | 3.76447944 | 0.00144212 | 0.03559497 | -1.049819  |
| ANAPC5      | 0.18696912 | 10.0035277 | 4.05071732 | 0.00076458 | 0.02525567 | -0.4504265 |
| TSC22D1     | 0.18617797 | 9.09787686 | 4.34373051 | 0.0004002  | 0.01789556 | 0.16248902 |
| EIF3D       | 0.18573016 | 10.4730926 | 4.97884225 | 0.00010023 | 0.00936197 | 1.47449411 |
| PDE1B       | 0.18546282 | 10.8763249 | 4.44890056 | 0.00031756 | 0.0158282  | 0.38169413 |
| RASAL1      | 0.18483579 | 8.86119083 | 4.31763245 | 0.00042389 | 0.01879399 | 0.10801077 |
| ZER1        | 0.18444604 | 12.3539291 | 4.34602411 | 0.00039819 | 0.01788115 | 0.16727533 |
| 2610208M17  | 0.18365454 | 9.26142735 | 4.40864945 | 0.00034692 | 0.01634416 | 0.29786614 |
| D430041B17  | 0.18326537 | 9.12323543 | 5.63343155 | 2.51E-05   | 0.00453347 | 2.78448168 |
| LOC1000450  | 0.18307323 | 11.2231454 | 4.44499351 | 0.00032029 | 0.01586875 | 0.37356111 |
| PPARGC1B    | 0.18173284 | 9.53128162 | 4.68937558 | 0.00018764 | 0.01214815 | 0.88038075 |
| TCEAL3      | 0.18108658 | 8.92495809 | 4.49482976 | 0.0002871  | 0.01545824 | 0.47723517 |

|             |            |            |            |            |            |            |
|-------------|------------|------------|------------|------------|------------|------------|
| MMP24       | 0.18031522 | 9.0457707  | 5.00856376 | 9.40E-05   | 0.00902024 | 1.53504303 |
| LMO3        | 0.18017455 | 8.37342408 | 4.18809319 | 0.00056418 | 0.02165034 | -0.1627787 |
| ARL6IP1     | 0.17875161 | 12.5945866 | 4.05260063 | 0.00076139 | 0.02525567 | -0.4464812 |
| LOC1000476  | 0.1780045  | 10.4896882 | 3.90158311 | 0.00106404 | 0.02986396 | -0.7628545 |
| WSCD1       | 0.1779186  | 8.90817941 | 3.58746022 | 0.00213486 | 0.0430769  | -1.4192634 |
| 1500011H22  | 0.17748554 | 10.1429446 | 4.04425878 | 0.00077559 | 0.02526478 | -0.4639564 |
| TATDN2      | 0.17665222 | 8.41013248 | 5.22501194 | 5.92E-05   | 7.18E-03   | 1.97312615 |
| SCAMP2      | 0.17556517 | 8.77843666 | 3.98613375 | 0.00088218 | 0.02675199 | -0.5857311 |
| EG434858    | 0.17550985 | 8.69900991 | 4.37788541 | 0.00037121 | 0.01695854 | 0.23373872 |
| EXTL1       | 0.17547483 | 8.80908867 | 5.18747553 | 6.41E-05   | 7.52E-03   | 1.89752944 |
| DYNC1H1     | 0.17521284 | 10.2921665 | 3.83003193 | 0.00124701 | 0.03217518 | -0.9126725 |
| LMAN2L      | 0.17513689 | 9.21099533 | 4.48755041 | 0.00029173 | 0.01546967 | 0.46210117 |
| 6430598A04  | 0.17501123 | 8.39333158 | 4.89579904 | 0.00011989 | 0.00980784 | 1.3048473  |
| LOC1000465  | 0.1748415  | 11.7565652 | 3.67584536 | 0.00175525 | 0.03938727 | -1.2350018 |
| TMSB10      | 0.17310779 | 11.0622247 | 3.65311846 | 0.00184592 | 0.03999989 | -1.2824251 |
| ARL2        | 0.17218214 | 9.19495199 | 3.80673413 | 0.00131313 | 0.03357103 | -0.96143   |
| LOR         | 0.17210107 | 9.26875914 | 4.78143542 | 0.00015359 | 0.01069161 | 1.07014392 |
| GABBR1      | 0.17201197 | 8.46303816 | 4.87135621 | 0.0001264  | 0.0102605  | 1.25478592 |
| RPS27L      | 0.1713086  | 10.4015661 | 3.52660898 | 0.00244259 | 4.70E-02   | -1.5458248 |
| CLPP        | 0.17119424 | 8.90672552 | 4.62275276 | 0.00021699 | 0.01353358 | 0.74262735 |
| DBR1        | 0.17066401 | 8.70835369 | 3.99233752 | 0.00087014 | 0.02660348 | -0.5727336 |
| HSF1        | 0.17062884 | 9.89883323 | 4.91013159 | 0.00011624 | 0.0096586  | 1.33417525 |
| SLC25A44    | 0.16956409 | 9.87377288 | 4.26102381 | 0.00048026 | 0.01979244 | -0.0102524 |
| MED30       | 0.16923612 | 10.0565877 | 4.74351789 | 0.00016678 | 0.01113939 | 0.9920702  |
| MAGI2       | 0.1691031  | 7.58313211 | 4.92148768 | 0.00011342 | 9.58E-03   | 1.3573985  |
| COG1        | 0.16909895 | 8.32080877 | 5.48986172 | 3.38E-05   | 4.82E-03   | 2.50169414 |
| BEX4        | 0.16890352 | 9.10806379 | 4.79049512 | 0.0001506  | 0.01069161 | 1.08877983 |
| FAM116B     | 0.16876119 | 9.60426378 | 4.39231913 | 0.00035961 | 1.67E-02   | 0.26383168 |
| STARD3NL    | 0.16860838 | 8.99338753 | 4.74831137 | 0.00016505 | 0.01109412 | 1.00194694 |
| ERH         | 0.16736157 | 10.7233644 | 3.54521086 | 0.00234412 | 0.04574792 | -1.5071648 |
| PRMT2       | 0.16687455 | 11.1476029 | 3.77210678 | 0.00141794 | 3.52E-02   | -1.0338684 |
| METTL3      | 0.1664318  | 9.36895529 | 4.51377378 | 0.00027542 | 0.01500795 | 0.5166051  |
| 2700094K13I | 0.16634583 | 10.635795  | 4.78878655 | 0.00015116 | 0.01069161 | 1.08526583 |
| PSME2       | 0.1636671  | 7.75933121 | 4.72746289 | 0.00017271 | 0.0113203  | 0.95897565 |
| SLC9A3R2    | 0.16340613 | 8.86538615 | 3.51717751 | 0.00249407 | 0.04765765 | -1.5654158 |
| ARPC5       | 0.16295467 | 11.1296861 | 3.92184969 | 0.00101729 | 0.02925189 | -0.7204039 |
| DRCTNNB1A   | 0.16293861 | 8.36220791 | 4.2572087  | 0.00048432 | 0.01979244 | -0.018227  |
| 1700027N10  | 0.16283907 | 8.01199439 | 3.99408059 | 0.00086678 | 0.02660348 | -0.5690816 |
| CBLN1       | 0.16219685 | 8.54147333 | 3.51164589 | 0.00252477 | 0.04774887 | -1.5769026 |
| LSM8        | 0.16203568 | 9.56242039 | 3.88765397 | 0.00109742 | 0.0302378  | -0.7920274 |
| MID1        | 0.16179284 | 7.85526935 | 3.88519426 | 0.00110342 | 0.03024524 | -0.7971787 |
| WDR61       | 0.16166385 | 9.83441411 | 3.75252231 | 0.00148087 | 0.03590904 | -1.07482   |
| CLTA        | 0.16087618 | 10.2301261 | 3.64775913 | 0.00186797 | 4.01E-02   | -1.2936041 |

|             |            |            |            |            |            |            |
|-------------|------------|------------|------------|------------|------------|------------|
| LASS5       | 0.16067632 | 9.45211093 | 4.25136442 | 0.0004906  | 0.01991287 | -0.0304441 |
| EG633640    | 0.16063123 | 7.72314209 | 5.21084281 | 6.10E-05   | 7.23E-03   | 1.9446093  |
| ATP2B1      | 0.15946217 | 9.34355751 | 4.02743305 | 0.00080504 | 0.0258163  | -0.4992058 |
| LOC1000461  | 0.15905697 | 8.01197679 | 4.28744387 | 0.00045306 | 0.01930163 | 0.04495817 |
| EEF2        | 0.15875319 | 8.35025708 | 3.67769564 | 0.00174807 | 3.93E-02   | -1.2311397 |
| VTI1B       | 0.15870814 | 12.2250299 | 4.18961211 | 0.00056229 | 0.02165034 | -0.1596004 |
| UHRF2       | 0.1586985  | 9.13106673 | 4.9426383  | 0.00010836 | 0.00954633 | 1.4006179  |
| G3BP1       | 0.15838604 | 8.93058992 | 4.1420367  | 0.00062466 | 0.02265307 | -0.2591763 |
| RCL1        | 0.15806718 | 8.42388567 | 4.83714759 | 0.00013611 | 0.01047438 | 1.18462908 |
| CALN1       | 0.15614126 | 12.0283157 | 4.08694837 | 0.00070564 | 0.0244688  | -0.3745338 |
| DUS4L       | 0.15590533 | 8.41962591 | 5.51861634 | 3.18E-05   | 0.00482368 | 2.55854919 |
| LSM3        | 0.1550127  | 9.23406093 | 4.0081901  | 0.0008401  | 0.02626501 | -0.5395208 |
| MAPK1       | 0.15488021 | 11.321404  | 4.92662293 | 0.00011217 | 0.00954633 | 1.36789597 |
| B9D1        | 0.15457714 | 8.63456699 | 4.16480825 | 0.00059398 | 0.02207153 | -0.2115085 |
| SYVN1       | 0.1545448  | 10.5735392 | 4.81347911 | 0.00014328 | 0.0106406  | 1.1360257  |
| DENND2A     | 0.15444509 | 8.29597454 | 3.83541975 | 0.00123219 | 0.03187095 | -0.9013949 |
| GSPT1       | 0.15355112 | 10.8230872 | 4.77377318 | 0.00015617 | 0.01069161 | 1.05437701 |
| LOC1000482  | 0.15320556 | 9.89374789 | 3.75029931 | 0.00148819 | 0.03593784 | -1.0794675 |
| VWF         | 0.15313558 | 7.58027007 | 4.28691072 | 0.0004536  | 0.01930163 | 0.04384429 |
| KLF13       | 0.15303162 | 10.3038807 | 3.49255542 | 0.0026336  | 4.87E-02   | -1.6165261 |
| UQCRC2      | 0.15298275 | 12.555152  | 3.9499884  | 0.00095577 | 0.0283173  | -0.6614573 |
| ATG16L1     | 0.15290626 | 10.1351094 | 4.73286764 | 0.00017069 | 0.0113203  | 0.97011898 |
| 4931406P16I | 0.15271542 | 9.15732291 | 3.89820759 | 0.00107204 | 0.03000851 | -0.7699244 |
| ZFP672      | 0.15246462 | 9.711252   | 4.30823505 | 0.00043276 | 0.01879399 | 0.08838709 |
| SMN1        | 0.15240586 | 10.0363525 | 3.66839605 | 0.00178447 | 3.95E-02   | -1.250549  |
| SUHW4       | 0.1520486  | 9.01608947 | 4.0607486  | 0.00074778 | 0.02525567 | -0.4294127 |
| ABHD14B     | 0.15182283 | 9.13086514 | 3.54994954 | 0.00231967 | 0.04544954 | -1.4973122 |
| EXOSC7      | 0.1515962  | 10.0604989 | 4.51424    | 0.00027514 | 0.01500795 | 0.51757373 |
| SLC8A2      | 0.15132136 | 8.4344837  | 3.51416753 | 0.00251073 | 0.04774005 | -1.5716666 |
| H3F3A       | 0.15114808 | 10.167176  | 4.19453755 | 0.00055621 | 0.02165034 | -0.1492947 |
| ORC6L       | 0.15081333 | 9.61310736 | 4.45654432 | 0.00031227 | 0.0158282  | 0.39760307 |
| MAS1        | 0.15080326 | 8.79785389 | 4.18398836 | 0.00056933 | 0.02173783 | -0.1713681 |
| GM1821      | 0.15080022 | 14.5101826 | 4.52208117 | 0.00027045 | 1.50E-02   | 0.5338626  |
| LOC1000483  | 0.1502078  | 8.75074611 | 3.78367923 | 0.00138201 | 3.47E-02   | -1.0096638 |
| PACRG       | 0.14966189 | 9.41480311 | 4.07544106 | 0.00072384 | 0.02470159 | -0.3986364 |
| DMAP1       | 0.14915744 | 8.75628093 | 4.11055807 | 0.00066971 | 0.02387662 | -0.3250878 |
| MRPL10      | 0.14898598 | 10.1693607 | 4.10754522 | 0.00067419 | 0.02390011 | -0.3313971 |
| TDRD7       | 0.14880619 | 9.56353556 | 4.78873204 | 0.00015118 | 1.07E-02   | 1.08515372 |
| COPZ1       | 0.1482163  | 9.98079258 | 3.671027   | 0.0017741  | 0.03946587 | -1.2450584 |
| ZFP282      | 0.14702639 | 8.66786284 | 4.35688025 | 0.00038878 | 0.01753335 | 0.18992684 |
| PIGK        | 0.1469043  | 7.89787302 | 4.85643928 | 0.00013054 | 0.01035803 | 1.22420685 |
| POLD2       | 0.14683051 | 8.16933594 | 3.80906568 | 0.00130636 | 0.03354252 | -0.9565512 |
| LOC1000462  | 0.1465748  | 11.8201642 | 3.50230234 | 0.00257747 | 4.82E-02   | -1.5962996 |

|             |            |            |            |            |            |            |
|-------------|------------|------------|------------|------------|------------|------------|
| ING4        | 0.14646713 | 8.67002446 | 4.43601875 | 0.00032667 | 0.01595994 | 0.35487579 |
| TMEM147     | 0.145731   | 11.1240551 | 4.01030226 | 0.00083618 | 0.02626261 | -0.5350957 |
| TUBB5       | 0.1455329  | 13.4749551 | 4.07889141 | 0.00071834 | 0.02469253 | -0.3914093 |
| HDGF        | 0.14508715 | 10.1173034 | 3.66018831 | 0.00181722 | 0.03970426 | -1.2676757 |
| PRDM4       | 0.14378747 | 9.50469255 | 5.28865781 | 5.17E-05   | 0.00650479 | 2.10092893 |
| THOC4       | 0.14338703 | 9.26818632 | 4.81636825 | 0.00014238 | 0.0106406  | 1.14196127 |
| CACNB3      | 0.14319773 | 8.97196061 | 3.66554292 | 0.00179579 | 3.95E-02   | -1.2565029 |
| ZFP316      | 0.14160263 | 7.80156754 | 4.57357662 | 0.00024162 | 0.01437426 | 0.64073697 |
| DPYSL3      | 0.14158218 | 8.24719702 | 3.62441838 | 0.0019671  | 0.0409443  | -1.3422713 |
| WBP2        | 0.14157056 | 14.1376787 | 3.88072114 | 0.00111442 | 0.0303973  | -0.8065463 |
| RBBP7       | 0.14134727 | 8.38107256 | 5.55405614 | 2.96E-05   | 0.00472836 | 2.62847383 |
| EXOC4       | 0.13968842 | 8.78500308 | 4.13825186 | 0.00062991 | 0.02276527 | -0.2671002 |
| XAB1        | 0.13935095 | 9.11144955 | 4.06205906 | 0.00074561 | 0.02525567 | -0.4266676 |
| BC002163    | 0.13903927 | 11.4785126 | 3.51658141 | 0.00249736 | 0.04765765 | -1.5666537 |
| GRIA1       | 0.13860623 | 10.182572  | 4.1190012  | 0.00065732 | 0.02351413 | -0.3074074 |
| PHF5A       | 0.13831598 | 10.4358163 | 4.8354479  | 0.00013661 | 0.01047438 | 1.18114047 |
| A130092J06F | 0.13819943 | 8.71973404 | 3.48722922 | 0.00266478 | 4.90E-02   | -1.6275755 |
| PYCR2       | 0.13789917 | 9.02437896 | 3.65727996 | 0.00182897 | 3.98E-02   | -1.2737435 |
| JTV1        | 0.13789657 | 8.56783898 | 4.38242365 | 0.00036753 | 0.01693666 | 0.24320164 |
| RPS27A      | 0.13709563 | 9.83155915 | 4.15212919 | 0.00061087 | 0.0223838  | -0.2380482 |
| ILK         | 0.13705113 | 9.88498295 | 4.2952632  | 0.00044532 | 0.01910341 | 0.06129331 |
| MUM1        | 0.13653245 | 9.76793586 | 4.31230437 | 0.0004289  | 0.01879399 | 0.09688512 |
| DHR57B      | 0.13641495 | 8.68033067 | 4.93295395 | 0.00011065 | 0.00954633 | 1.38083426 |
| ZCCHC18     | 0.13633356 | 12.8984495 | 4.51849634 | 0.00027259 | 0.01500795 | 0.52641613 |
| EGFL7       | 0.13588784 | 8.76865683 | 3.63598862 | 0.00191732 | 0.04036789 | -1.3181505 |
| CASKIN1     | 0.1357915  | 9.5293451  | 4.44118308 | 0.00032298 | 0.01592736 | 0.36562839 |
| KHDRBS1     | 0.13508343 | 8.73762982 | 3.7841345  | 0.00138062 | 0.03472466 | -1.0087114 |
| CHMP4B      | 0.13478102 | 9.64887237 | 3.99911639 | 0.00085717 | 0.02652691 | -0.5585311 |
| GDPD1       | 0.13434244 | 10.0910966 | 3.98005613 | 0.00089415 | 0.0268174  | -0.5984643 |
| 2010003O18  | 0.13426418 | 9.81555909 | 3.59665254 | 0.00209185 | 0.04261645 | -1.4001219 |
| IFITM2      | 0.13408053 | 7.77998072 | 3.53223649 | 0.00241238 | 0.04671158 | -1.5341321 |
| ZNRD1       | 0.13379869 | 9.2295584  | 4.41541492 | 0.0003418  | 0.01632144 | 0.3119622  |
| CBFA2T3H    | 0.13351573 | 8.34434919 | 4.27906552 | 0.00046151 | 0.01955849 | 0.02745254 |
| ORF61       | 0.13284415 | 9.49859862 | 3.94895808 | 0.00095795 | 0.0283173  | -0.6636158 |
| RPS4X       | 0.13261574 | 12.7098057 | 3.54415484 | 0.0023496  | 0.04574792 | -1.5093602 |
| D1BWG0212   | 0.13206621 | 8.26317149 | 3.93340914 | 0.00099155 | 0.02882594 | -0.6961893 |
| NT5C3       | 0.13192345 | 9.61698733 | 3.69706555 | 0.00167461 | 3.81E-02   | -1.1906986 |
| MYCBP2      | 0.13175871 | 9.80120915 | 4.0142973  | 0.00082881 | 0.02626261 | -0.5267258 |
| EDNRA       | 0.13153306 | 7.80287202 | 3.78719539 | 0.00137128 | 0.03461981 | -1.0023086 |
| ATP5C1      | 0.131482   | 12.6317191 | 4.090587   | 0.00069998 | 0.02445981 | -0.3669128 |
| SETD1A      | 0.12976273 | 8.68510078 | 3.53406829 | 0.00240262 | 0.04660821 | -1.5303255 |
| SNRP70      | 0.12905868 | 8.89491785 | 3.648184   | 0.00186621 | 0.04009013 | -1.2927179 |
| SPRN        | 0.12881875 | 8.00073114 | 3.84059845 | 0.00121812 | 0.0317664  | -0.8905544 |

|            |            |            |            |            |            |            |
|------------|------------|------------|------------|------------|------------|------------|
| RANBP1     | 0.1287717  | 10.3455873 | 4.1733601  | 0.00058286 | 0.0219656  | -0.19361   |
| INTS4      | 0.12812206 | 9.30587442 | 3.53828477 | 0.00238032 | 4.63E-02   | -1.5215623 |
| THOC5      | 0.12752478 | 8.78609979 | 4.05114278 | 0.00076386 | 0.02525567 | -0.4495352 |
| MORF4L2    | 0.12689124 | 13.1272204 | 3.73004229 | 0.00155655 | 3.66E-02   | -1.1218084 |
| TSTA3      | 0.12676568 | 9.79831986 | 3.79814357 | 0.00133838 | 0.03403366 | -0.9794044 |
| SMARCD2    | 0.12676168 | 8.1412462  | 3.90227816 | 0.0010624  | 0.02986396 | -0.7613987 |
| EMD        | 0.12628669 | 8.15997895 | 5.04701708 | 8.66E-05   | 0.00874856 | 1.61324433 |
| AMZ2       | 0.12620645 | 9.30685158 | 3.74075962 | 0.00152    | 0.03633807 | -1.0994092 |
| FBXL6      | 0.12550764 | 8.62592373 | 4.23613961 | 0.00050737 | 0.02020496 | -0.0622761 |
| UBE2L3     | 0.12546883 | 11.2301617 | 3.54962099 | 0.00232136 | 0.04544954 | -1.4979954 |
| ZFX        | 0.12541529 | 7.98917047 | 4.53359055 | 0.00026372 | 0.01484816 | 0.55776453 |
| PNKP       | 0.12478613 | 8.65915579 | 4.48909354 | 0.00029074 | 0.01546967 | 0.46530966 |
| GSTP1      | 0.12433132 | 10.3660904 | 3.89254989 | 0.00108557 | 0.03014745 | -0.7817738 |
| MAPK11     | 0.1236623  | 8.74313207 | 3.52765468 | 0.00243695 | 0.04695976 | -1.5436523 |
| ST5        | 0.12331556 | 8.93081243 | 4.25906266 | 0.00048234 | 0.01979244 | -0.0143517 |
| ANKRD39    | 0.12329439 | 8.27174011 | 4.17356684 | 0.00058259 | 0.0219656  | -0.1931773 |
| SERBP1     | 0.1226573  | 10.5685327 | 3.92468474 | 0.00101091 | 0.02923188 | -0.7144652 |
| SYF2       | 0.12262014 | 9.39961167 | 4.53896673 | 0.00026063 | 0.01478734 | 0.56892647 |
| NARG1L     | 0.12257279 | 7.90714917 | 4.5637677  | 0.00024686 | 0.01437426 | 0.62039309 |
| LOC1000467 | 0.12247182 | 8.63062001 | 3.49243003 | 0.00263433 | 4.87E-02   | -1.6167863 |
| BRD9       | 0.12238066 | 10.2081159 | 3.79409862 | 0.00135044 | 0.03425777 | -0.9878671 |
| VAPB       | 0.12152226 | 9.06547337 | 3.93647998 | 0.00098482 | 0.02878278 | -0.6897564 |
| HDGFRP2    | 0.12151996 | 10.8939024 | 3.63663135 | 0.00191459 | 0.04036789 | -1.3168103 |
| KCNIP4     | 0.1211028  | 7.68505453 | 4.02727199 | 0.00080533 | 0.0258163  | -0.4995432 |
| RAB9B      | 0.12034952 | 9.8051588  | 3.70123039 | 0.00165922 | 0.037818   | -1.1820007 |
| MTX1       | 0.11980733 | 9.24712805 | 4.10209419 | 0.00068238 | 0.02392393 | -0.3428128 |
| PTK2       | 0.1177899  | 11.1997155 | 4.35765996 | 0.00038811 | 0.01753335 | 0.19155351 |
| TOMM34     | 0.11767693 | 9.34356139 | 3.59995624 | 0.00207661 | 0.04247652 | -1.3932412 |
| RALY       | 0.1167667  | 9.37994488 | 3.51911561 | 0.00248341 | 0.04756826 | -1.5613906 |
| WRB        | 0.11669248 | 9.79492227 | 4.1611704  | 0.00059878 | 0.02216078 | -0.2191229 |
| NUMA1      | 0.1165107  | 7.73571399 | 3.50291871 | 0.00257396 | 0.04822693 | -1.5950202 |
| CYB5R3     | 0.11619442 | 8.69717134 | 3.57680197 | 0.00218583 | 0.04360513 | -1.4414502 |
| RASSF1     | 0.11578866 | 8.30912044 | 3.64935852 | 0.00186136 | 0.04009013 | -1.2902681 |
| SSBP2      | 0.11575743 | 9.14415591 | 3.48675503 | 0.00266758 | 0.04904346 | -1.628559  |
| MRPL46     | 0.11394568 | 9.52579684 | 4.27360288 | 0.00046711 | 0.01962085 | 0.01603757 |
| RUVBL1     | 0.11391366 | 8.72750126 | 4.81904183 | 0.00014156 | 0.0106406  | 1.14745334 |
| ATG9B      | 0.11348257 | 7.99402137 | 3.63256099 | 0.00193193 | 0.04037166 | -1.325297  |
| FOXK1      | 0.11298991 | 7.4618419  | 3.59315846 | 0.0021081  | 0.04278225 | -1.4073984 |
| ZFP295     | 0.11185828 | 8.17988314 | 4.60030772 | 0.0002279  | 0.0138218  | 0.6961438  |
| RPA3       | 0.10951004 | 9.12019417 | 3.87767554 | 0.00112197 | 0.03051595 | -0.8129242 |
| TDRKH      | 0.10906305 | 8.44437328 | 3.47832844 | 0.00271772 | 0.04961946 | -1.6460348 |
| ACTB       | 0.10845888 | 12.1140291 | 3.63929549 | 0.00190332 | 4.03E-02   | -1.3112551 |
| TMED4      | 0.10825167 | 9.12854136 | 4.39547476 | 0.00035712 | 0.01666395 | 0.27040947 |

|             |            |            |            |            |            |            |
|-------------|------------|------------|------------|------------|------------|------------|
| SLC2A3      | 0.10673457 | 11.3323739 | 3.72964287 | 0.00155793 | 0.03656519 | -1.1226431 |
| MBD3L2      | 0.10654811 | 7.39180782 | 3.49408431 | 0.00262471 | 0.04867947 | -1.6133539 |
| TSC22D2     | 0.10649417 | 9.54903723 | 4.15980907 | 0.00060059 | 0.02216078 | -0.2219723 |
| RPS6KA5     | 0.10636275 | 7.95177987 | 4.05052646 | 0.0007649  | 0.02525567 | -0.4508263 |
| NFRKB       | 0.10627811 | 8.21998627 | 3.59099432 | 0.00211822 | 4.28E-02   | -1.4119049 |
| IL18BP      | 0.10540903 | 7.45261636 | 3.54467464 | 0.0023469  | 4.57E-02   | -1.5082796 |
| 5133400G04  | 0.10364604 | 7.86018462 | 4.1928654  | 0.00055827 | 0.02165034 | -0.1527933 |
| LONRF2      | 0.10325084 | 7.96812964 | 4.14238597 | 0.00062418 | 0.02265307 | -0.2584451 |
| LOC1000480  | 0.10252092 | 8.84783397 | 3.66081519 | 0.0018147  | 3.97E-02   | -1.2663677 |
| MADD        | 0.10251097 | 7.55477999 | 3.87341774 | 0.00113262 | 0.03064746 | -0.8218403 |
| DCTN4       | 0.10127044 | 10.0855676 | 3.68302901 | 0.00172753 | 0.03903767 | -1.2200064 |
| CEBPB       | 0.1005204  | 9.00095948 | 4.00179884 | 0.00085209 | 0.02647864 | -0.5529111 |
| GMDS        | 0.10011521 | 7.77673895 | 3.77224146 | 0.00141751 | 0.03520817 | -1.0335867 |
| SLC35B3     | 0.10003218 | 8.70036831 | 3.7688044  | 0.00142836 | 0.0353837  | -1.0407747 |
| SIN3A       | 0.09401916 | 8.71878523 | 3.63927799 | 0.0019034  | 0.04032348 | -1.3112916 |
| MED26       | 0.09379981 | 8.2156832  | 3.74286936 | 0.00151291 | 0.0362857  | -1.0949994 |
| KCNC1       | 0.09348525 | 9.31369903 | 3.57714707 | 0.00218417 | 0.04360513 | -1.4407319 |
| LOC1000483  | 0.09264571 | 8.77680998 | 3.64295749 | 0.00188794 | 0.04024431 | -1.3036184 |
| GPR27       | 0.09084794 | 7.52805571 | 3.6474913  | 0.00186907 | 0.04009013 | -1.2941627 |
| LOC1000454  | 0.08998439 | 7.75949744 | 3.75355716 | 0.00147748 | 0.03590904 | -1.0726565 |
| 6430526O11  | -0.0803317 | 7.32928631 | -3.5599261 | 0.00226902 | 0.04475701 | -1.4765636 |
| LOC1000460  | -0.0939378 | 8.06551448 | -3.6443909 | 0.00188196 | 0.04020305 | -1.3006291 |
| GJD3        | -0.0950662 | 7.21793288 | -3.5775897 | 0.00218203 | 0.04360513 | -1.4398106 |
| BBS2        | -0.0991047 | 8.23760203 | -3.5640847 | 0.00224824 | 0.04451339 | -1.4679127 |
| MAPK10      | -0.100847  | 8.0639822  | -3.6957951 | 0.00167933 | 0.03811177 | -1.1933517 |
| PCMTD1      | -0.1037211 | 7.85396725 | -3.6751581 | 0.00175793 | 0.03938727 | -1.2364362 |
| KCNG4       | -0.1043834 | 7.6080946  | -3.5605001 | 0.00226614 | 0.04475701 | -1.4753697 |
| AFAP1L1     | -0.1062162 | 7.4500965  | -3.6719233 | 0.00177058 | 0.03946587 | -1.2431878 |
| LOC1000424  | -0.1063231 | 13.8043571 | -3.7104017 | 0.00162583 | 0.03737982 | -1.1628444 |
| 9130213B05I | -0.1069077 | 9.48811239 | -3.5818103 | 0.00216173 | 4.34E-02   | -1.4310256 |
| SNF8        | -0.1070575 | 7.81359008 | -3.6038092 | 0.00205896 | 0.04235524 | -1.3852155 |
| NDUFS4      | -0.108737  | 10.9825778 | -3.7183094 | 0.00159757 | 0.03703067 | -1.1463246 |
| TPRKB       | -0.1087425 | 8.81131795 | -3.4847138 | 0.00267964 | 4.92E-02   | -1.6327929 |
| SUPT5H      | -0.1098681 | 9.74623783 | -3.7640075 | 0.00144363 | 0.03559497 | -1.050806  |
| RIC8B       | -0.1117321 | 9.07147682 | -3.6107304 | 0.00202765 | 0.04195989 | -1.3707965 |
| SNX25       | -0.1119011 | 8.23030215 | -4.4115401 | 0.00034473 | 0.01634416 | 0.30388912 |
| PREP        | -0.1122768 | 8.26468362 | -3.9402871 | 0.00097654 | 0.02862632 | -0.6817809 |
| EDNRB       | -0.1127842 | 9.17500696 | -3.5998849 | 0.00207693 | 0.04247652 | -1.3933899 |
| KIFAP3      | -0.1128841 | 11.2770488 | -4.0476034 | 0.00076987 | 0.02526478 | -0.4569498 |
| SPINK10     | -0.1139919 | 7.61191093 | -3.7051227 | 0.00164496 | 3.76E-02   | -1.1738713 |
| MTERFD3     | -0.114198  | 7.85938397 | -3.7175929 | 0.00160011 | 0.03703067 | -1.1478215 |
| ZCCHC17     | -0.1142747 | 9.24662207 | -3.4967327 | 0.00260939 | 0.04848053 | -1.6078585 |
| 5730410I19R | -0.1143842 | 9.27546424 | -3.751694  | 0.00148359 | 0.03590904 | -1.0765517 |

|             |            |            |            |            |            |            |
|-------------|------------|------------|------------|------------|------------|------------|
| NOL14       | -0.1146011 | 8.14815321 | -3.5100292 | 0.00253381 | 0.04783414 | -1.5802593 |
| TMEM209     | -0.1147492 | 8.83965484 | -3.6694938 | 0.00178013 | 0.03946587 | -1.2482582 |
| ABHD6       | -0.1150124 | 7.7221962  | -3.7477096 | 0.00149676 | 0.03602087 | -1.0848815 |
| POU3F1      | -0.1154865 | 9.00795574 | -4.0420599 | 0.00077938 | 0.02530701 | -0.4685629 |
| CLP1        | -0.1172426 | 7.53894072 | -4.0859554 | 0.00070719 | 0.0244688  | -0.3766135 |
| DEXI        | -0.1174009 | 8.69257547 | -3.6700362 | 0.001778   | 0.03946587 | -1.2471261 |
| LIAS        | -0.1191533 | 10.056471  | -3.610018  | 0.00203085 | 0.04195989 | -1.3722808 |
| TMEM85      | -0.1203639 | 11.6230742 | -4.7921497 | 0.00015006 | 0.01069161 | 1.0921825  |
| NFKBIL2     | -0.1231155 | 7.27318972 | -3.7379893 | 0.00152937 | 0.0363793  | -1.1051996 |
| YLPM1       | -0.1245177 | 8.48186849 | -3.6295398 | 0.00194491 | 0.04056243 | -1.3315955 |
| PCDHB20     | -0.1247237 | 7.57096906 | -3.5822565 | 0.0021596  | 0.04337032 | -1.4300966 |
| CSNRP3      | -0.1257049 | 9.54251392 | -3.7802832 | 0.00139246 | 0.03482135 | -1.0167673 |
| CLCN3       | -0.1276245 | 10.1249894 | -4.0890771 | 0.00070232 | 0.02446071 | -0.3700753 |
| FKBP7       | -0.1278957 | 7.41293178 | -4.1650797 | 0.00059363 | 0.02207153 | -0.2109403 |
| ZFR         | -0.1284916 | 7.3675072  | -4.2558588 | 0.00048576 | 0.01979244 | -0.0210489 |
| TCERG1      | -0.1285572 | 7.94280238 | -3.7054727 | 0.00164369 | 0.03757425 | -1.1731402 |
| NUDT18      | -0.1295314 | 10.7081417 | -3.7471992 | 0.00149845 | 0.03602087 | -1.0859483 |
| CHFR        | -0.1296175 | 9.26186758 | -3.605056  | 0.00205329 | 0.04232096 | -1.3826184 |
| ZFP161      | -0.1302061 | 7.62611164 | -4.6935265 | 0.00018595 | 0.0121131  | 0.88895208 |
| HIVEP2      | -0.130601  | 7.4323918  | -4.1212031 | 0.00065412 | 0.02347945 | -0.3027967 |
| CADM2       | -0.1306986 | 8.6894753  | -4.1717878 | 0.00058489 | 0.0219656  | -0.1969005 |
| CSDA        | -0.1307009 | 7.88704555 | -3.8469579 | 0.00120106 | 0.0317664  | -0.8772413 |
| DLGAP2      | -0.1308983 | 9.560601   | -3.5944502 | 0.00210208 | 0.04274226 | -1.4047085 |
| PRPF38A     | -0.1317356 | 8.10887284 | -3.9903167 | 0.00087404 | 0.02660348 | -0.5769674 |
| UBE2D3      | -0.1333185 | 9.42536592 | -3.9411236 | 0.00097474 | 0.02862632 | -0.6800285 |
| CPSF2       | -0.1342043 | 7.55813994 | -3.6665022 | 0.00179197 | 3.95E-02   | -1.254501  |
| ABCA5       | -0.1344657 | 7.51106804 | -4.0012636 | 0.0008531  | 0.02647864 | -0.5540325 |
| NAT5        | -0.1351429 | 9.48699766 | -3.7197853 | 0.00159235 | 0.03701346 | -1.143241  |
| H1FO        | -0.1351502 | 8.07874811 | -3.5007648 | 0.00258624 | 0.04830549 | -1.5994908 |
| GLRB        | -0.1352244 | 7.55868085 | -3.7232765 | 0.00158008 | 0.03689059 | -1.1359464 |
| 2310047O13  | -0.1352341 | 7.66377073 | -3.5298152 | 0.00242533 | 0.04687641 | -1.5391632 |
| C130074G19  | -0.1354887 | 7.88717846 | -3.6460368 | 0.00187511 | 0.04013795 | -1.2971963 |
| 1700023B02I | -0.1365221 | 8.22573752 | -3.5122443 | 0.00252143 | 4.77E-02   | -1.5756601 |
| ST13        | -0.1379178 | 7.74137869 | -3.9246231 | 0.00101105 | 0.02923188 | -0.7145944 |
| HISPPD1     | -0.1381504 | 7.83575908 | -4.8018035 | 0.00014695 | 0.01069161 | 1.11203127 |
| CAPN2       | -0.1383722 | 8.27107947 | -4.5664679 | 0.0002454  | 1.44E-02   | 0.62599409 |
| EIF4G2      | -0.1387461 | 7.92252007 | -4.4684063 | 0.00030424 | 0.01567591 | 0.42228476 |
| MGLL        | -0.1390224 | 9.94378225 | -3.9107853 | 0.00104255 | 0.02957543 | -0.7435801 |
| PTPRS       | -0.1390886 | 11.4334218 | -3.6330777 | 0.00192972 | 4.04E-02   | -1.3242196 |
| CST3        | -0.1390921 | 14.0045232 | -3.5155128 | 0.00250327 | 0.04768417 | -1.568873  |
| GNAS        | -0.1402617 | 10.0597654 | -3.5550888 | 0.00229344 | 4.52E-02   | -1.4866249 |
| 5730494N06  | -0.1402758 | 9.41623351 | -3.7148672 | 0.00160981 | 3.72E-02   | -1.153516  |
| 2810410P22I | -0.140333  | 8.57764437 | -3.6656241 | 0.00179547 | 0.03948115 | -1.2563336 |



|            |            |            |            |            |            |            |
|------------|------------|------------|------------|------------|------------|------------|
| ACOT11     | -0.141302  | 8.36026983 | -4.2772759 | 0.00046334 | 0.01955849 | 0.02371306 |
| GLRX       | -0.1414744 | 10.9404864 | -3.7242947 | 0.00157651 | 3.69E-02   | -1.1338188 |
| SLC40A1    | -0.1416018 | 8.85927315 | -3.5915524 | 0.00211561 | 4.28E-02   | -1.4107428 |
| 6430548M08 | -0.1427289 | 10.9664556 | -3.6144432 | 0.00201104 | 0.0417766  | -1.3630604 |
| 2410015M2C | -0.1433144 | 8.7773327  | -4.035274  | 0.00079118 | 0.02561145 | -0.4827791 |
| UHRF1BP1L  | -0.1434568 | 9.53967134 | -3.9353293 | 0.00098734 | 0.02878278 | -0.6921668 |
| HSPA4L     | -0.1435737 | 7.7108802  | -4.0442053 | 0.00077568 | 0.02526478 | -0.4640685 |
| ASH1L      | -0.1442621 | 7.909971   | -3.8475401 | 0.00119952 | 0.0317664  | -0.8760225 |
| TMEM218    | -0.1442813 | 8.53966465 | -4.1916354 | 0.00055979 | 0.02165034 | -0.1553668 |
| DERL2      | -0.1456675 | 7.45903064 | -4.0326078 | 0.00079587 | 0.02568437 | -0.4883647 |
| TUBA3B     | -0.1465997 | 7.70010774 | -3.8659023 | 0.00115165 | 0.03081715 | -0.8375774 |
| LOC1000457 | -0.1466427 | 7.93095203 | -3.6606905 | 0.0018152  | 3.97E-02   | -1.2666279 |
| THY1       | -0.1467277 | 13.5455885 | -4.4102668 | 0.00034569 | 0.01634416 | 0.30123607 |
| FUT8       | -0.1475569 | 8.65968238 | -5.0356684 | 8.87E-05   | 0.00874856 | 1.59018114 |
| LOC216963  | -0.1488169 | 8.02440682 | -4.0075824 | 0.00084124 | 0.02626501 | -0.5407941 |
| RG9MTD1    | -0.1494071 | 8.48755627 | -4.9585734 | 0.0001047  | 9.53E-03   | 1.43315063 |
| LOC545013  | -0.1494416 | 7.66484905 | -4.9652888 | 0.0001032  | 0.00947015 | 1.44685299 |
| FIP1L1     | -0.1495388 | 7.72388406 | -5.282379  | 5.24E-05   | 0.00650479 | 2.08834228 |
| RRN3       | -0.1501706 | 8.70795332 | -3.9625496 | 0.00092952 | 0.02778825 | -0.6351416 |
| LOC1000446 | -0.1507001 | 12.0216155 | -3.6352927 | 0.00192028 | 0.04036789 | -1.3196015 |
| ABHD12     | -0.1508616 | 9.44510909 | -3.8053452 | 0.00131718 | 0.03357534 | -0.9643363 |
| APH1B      | -0.151971  | 9.266371   | -3.8391171 | 0.00122213 | 0.0317664  | -0.8936553 |
| ALDH6A1    | -0.1528466 | 9.7845189  | -3.4793173 | 0.00271178 | 0.04959697 | -1.6439844 |
| GRSF1      | -0.1544344 | 10.1115142 | -4.2646659 | 0.00047641 | 0.01979244 | -0.00264   |
| LRRC4C     | -0.1545145 | 7.88670858 | -3.8758845 | 0.00112644 | 0.03055863 | -0.8166748 |
| WDR23      | -0.1550338 | 7.93818618 | -3.7401735 | 0.00152198 | 0.03633807 | -1.1006343 |
| LMO2       | -0.1557949 | 9.3821128  | -4.1454766 | 0.00061993 | 0.02263695 | -0.2519747 |
| WDR17      | -0.1558571 | 8.68696574 | -3.8681837 | 0.00114584 | 0.03081715 | -0.8328004 |
| ZFP451     | -0.1564559 | 8.40970226 | -4.0517777 | 0.00076278 | 0.02525567 | -0.4482051 |
| 2610044O15 | -0.1569155 | 8.10324211 | -3.6923398 | 0.00169224 | 0.03832237 | -1.2005669 |
| GRIA4      | -0.1574046 | 7.42719461 | -3.918042  | 0.00102591 | 0.02934    | -0.72838   |
| PCDHA6     | -0.1575513 | 10.6803259 | -3.6015035 | 0.0020695  | 0.04247652 | -1.3900185 |
| AMIGO1     | -0.1575703 | 8.66731713 | -4.7712192 | 0.00015704 | 0.01069161 | 1.04912051 |
| STAM2      | -0.1596207 | 7.86622367 | -4.3095549 | 0.0004315  | 0.01879399 | 0.09114336 |
| LOC433801  | -0.1604121 | 7.84272998 | -4.0499773 | 0.00076583 | 0.02525567 | -0.4519768 |
| ALDOC      | -0.1604724 | 13.2028104 | -3.4884208 | 0.00265778 | 0.0490341  | -1.6251036 |
| KCNA2      | -0.1605114 | 9.17664985 | -3.6384953 | 0.0019067  | 0.04032348 | -1.3129237 |
| CDV3       | -0.1607756 | 10.7200533 | -3.6808284 | 0.00173597 | 3.91E-02   | -1.2246003 |
| ROCK2      | -0.1610946 | 8.32769383 | -3.566618  | 0.00223567 | 0.04443124 | -1.4626423 |
| SGTB       | -0.1612221 | 10.2994308 | -4.2722212 | 0.00046854 | 0.01962085 | 0.01315011 |
| EG622339   | -0.1627042 | 13.5035662 | -3.4818024 | 0.00269693 | 4.94E-02   | -1.638831  |
| TGFB2      | -0.1630293 | 7.60003332 | -4.1882669 | 0.00056397 | 0.02165034 | -0.1624151 |
| IL6ST      | -0.1630837 | 7.65963169 | -4.4734564 | 0.00030089 | 0.01567591 | 0.43279025 |

|             |            |            |            |            |            |            |
|-------------|------------|------------|------------|------------|------------|------------|
| D0H4S114    | -0.1634354 | 11.5110928 | -3.6421041 | 0.00189152 | 0.04024431 | -1.3053981 |
| PHTF2       | -0.1650936 | 8.13225559 | -4.4665934 | 0.00030546 | 0.01567591 | 0.41851307 |
| ABCD2       | -0.1652055 | 8.00728519 | -3.8363388 | 0.00122969 | 0.03187095 | -0.8994711 |
| FHOD3       | -0.1652565 | 8.22154908 | -3.5265346 | 0.00244299 | 4.70E-02   | -1.5459793 |
| SEMA3A      | -0.1663517 | 9.01915107 | -3.4771938 | 0.00272454 | 4.97E-02   | -1.6483875 |
| CETN2       | -0.1669167 | 8.11308925 | -3.8706023 | 0.00113971 | 0.03076053 | -0.8277359 |
| PDZD8       | -0.1676796 | 7.98245209 | -3.8171841 | 0.00128305 | 0.03302437 | -0.9395622 |
| UBE3A       | -0.167905  | 7.89953635 | -5.5889646 | 2.75E-05   | 0.00453347 | 2.6971881  |
| UBE2Q2      | -0.1683549 | 8.63428642 | -3.5122574 | 0.00252136 | 4.77E-02   | -1.575633  |
| GPR177      | -0.1689461 | 8.29973345 | -3.729273  | 0.00155921 | 0.03656519 | -1.1234161 |
| NFIC        | -0.1699004 | 8.22564978 | -5.0798825 | 8.07E-05   | 0.00851403 | 1.67995744 |
| 9130422G05  | -0.1703669 | 8.95589999 | -5.0087298 | 9.40E-05   | 0.00902024 | 1.53538103 |
| TCFE3       | -0.1703949 | 7.80417078 | -3.9933466 | 0.0008682  | 0.02660348 | -0.5706194 |
| ASB8        | -0.1707015 | 10.7008508 | -3.7563714 | 0.00146828 | 0.03590904 | -1.0667726 |
| TRAK1       | -0.1708425 | 9.6253053  | -3.564189  | 0.00224772 | 4.45E-02   | -1.4676958 |
| MYO6        | -0.1718104 | 10.0087718 | -3.9492823 | 0.00095726 | 0.0283173  | -0.6629365 |
| AGXT2L1     | -0.1727755 | 7.87128236 | -4.5129896 | 0.0002759  | 0.01500795 | 0.5149758  |
| ZNRF1       | -0.1731732 | 8.79042262 | -3.7345886 | 0.00154094 | 3.64E-02   | -1.1123072 |
| C1GALT1C1   | -0.1744278 | 9.03711403 | -3.89556   | 0.00107835 | 0.03010535 | -0.7754696 |
| STMN3       | -0.1750526 | 11.1287635 | -4.2618669 | 0.00047936 | 0.01979244 | -0.0084901 |
| CYR61       | -0.1757619 | 7.22230875 | -4.7760849 | 0.00015539 | 0.01069161 | 1.05913445 |
| SLC30A4     | -0.1758508 | 7.70362856 | -4.8975028 | 0.00011945 | 9.81E-03   | 1.30833457 |
| ARHGAP20    | -0.1760157 | 10.0221737 | -4.1061779 | 0.00067624 | 0.02390011 | -0.3342605 |
| MAPRE3      | -0.176068  | 8.08865264 | -4.9494895 | 0.00010677 | 0.00954633 | 1.41460823 |
| ATP2B2      | -0.1760819 | 9.75118756 | -4.6205961 | 0.00021801 | 0.01353358 | 0.73816249 |
| SH3BGR1     | -0.1765134 | 8.91192655 | -3.5190688 | 0.00248366 | 0.04756826 | -1.5614878 |
| EMB         | -0.1777382 | 9.94787478 | -3.5694627 | 0.00222163 | 4.42E-02   | -1.4567234 |
| ENPP2       | -0.177869  | 11.0111666 | -4.1829896 | 0.00057058 | 0.02173783 | -0.1734582 |
| TIMP4       | -0.1780647 | 8.30503367 | -5.6290631 | 2.53E-05   | 4.53E-03   | 2.7759177  |
| SLC39A12    | -0.1790096 | 9.77355053 | -6.0114878 | 1.15E-05   | 0.00303926 | 3.5155767  |
| SMARCC2     | -0.180558  | 9.05350431 | -4.0760214 | 0.00072292 | 0.02470159 | -0.3974209 |
| TSPYL4      | -0.1806403 | 7.58542523 | -4.4382088 | 0.0003251  | 0.0159572  | 0.35943587 |
| LOC329575   | -0.182228  | 9.20120536 | -4.1782841 | 0.00057655 | 0.02188608 | -0.1833052 |
| 1110008P14I | -0.1823471 | 12.1151011 | -4.7275242 | 0.00017268 | 0.0113203  | 0.95910201 |
| AAACL1      | -0.1826915 | 11.8767463 | -3.880596  | 0.00111473 | 0.0303973  | -0.8068083 |
| GPC5        | -0.1839766 | 8.91443967 | -5.5092457 | 3.25E-05   | 0.00482368 | 2.5400329  |
| KLHL7       | -0.1839865 | 10.1140051 | -6.2993531 | 6.45E-06   | 0.00259952 | 4.05834925 |
| ANK3        | -0.1845228 | 8.75934654 | -3.7118843 | 0.00162049 | 0.03733852 | -1.1597473 |
| ZMAT3       | -0.1856144 | 10.5869218 | -4.0258403 | 0.00080789 | 0.0258163  | -0.5025427 |
| NR1D2       | -0.1864507 | 8.71471308 | -3.5037399 | 0.00256929 | 0.04822693 | -1.5933158 |
| ZEB2        | -0.1874349 | 9.56213709 | -4.3262908 | 0.00041588 | 0.01851802 | 0.1260879  |
| OSBPL6      | -0.1876967 | 9.33250385 | -5.879496  | 1.51E-05   | 0.00345963 | 3.2626273  |
| SORL1       | -0.1883491 | 11.3785844 | -3.5974313 | 0.00208825 | 4.26E-02   | -1.3985001 |

|          |            |            |            |            |            |            |
|----------|------------|------------|------------|------------|------------|------------|
| HSP105   | -0.1890076 | 11.5101573 | -4.9278588 | 0.00011187 | 0.00954633 | 1.37042202 |
| ABAT     | -0.1893487 | 10.5606014 | -3.9928117 | 0.00086923 | 0.02660348 | -0.5717401 |
| MDH1     | -0.1904976 | 8.88696055 | -3.4972817 | 0.00260623 | 4.85E-02   | -1.6067193 |
| PTEN     | -0.1906967 | 8.29604428 | -3.9070208 | 0.00105129 | 0.02973106 | -0.7514652 |
| SKIV2L   | -0.1915418 | 9.10145632 | -5.6181754 | 2.59E-05   | 0.00453347 | 2.75456207 |
| LUZP2    | -0.19157   | 10.7919992 | -3.9440169 | 0.0009685  | 0.02854921 | -0.6739673 |
| CRIP1    | -0.1919416 | 8.34696681 | -7.0878948 | 1.40E-06   | 0.00127448 | 5.48009359 |
| PMP22    | -0.1925593 | 8.6723516  | -4.3140628 | 0.00042724 | 0.01879399 | 0.10055698 |
| FAM84A   | -0.1928733 | 7.91803284 | -4.9123111 | 0.00011569 | 0.0096586  | 1.33863341 |
| LRRTM3   | -0.1937815 | 8.17919309 | -6.2576691 | 7.01E-06   | 2.60E-03   | 3.98052184 |
| NRN1     | -0.1941367 | 12.5845376 | -4.247495  | 0.00049481 | 0.02000672 | -0.0385335 |
| CBLN2    | -0.1952227 | 8.07849599 | -5.4237716 | 3.89E-05   | 0.00525794 | 2.37061362 |
| GPR37L1  | -0.1955676 | 9.99328467 | -5.6922158 | 2.22E-05   | 4.38E-03   | 2.89947171 |
| OPN3     | -0.1959794 | 7.70812162 | -4.8582963 | 0.00013002 | 1.04E-02   | 1.22801484 |
| KCTD3    | -0.1960987 | 9.9574261  | -3.8447048 | 0.00120708 | 0.0317664  | -0.8819581 |
| NOL4     | -0.1960989 | 9.80834094 | -3.9802748 | 0.00089371 | 0.0268174  | -0.5980062 |
| HR       | -0.1971504 | 8.82807208 | -5.2857638 | 5.20E-05   | 0.00650479 | 2.09512812 |
| MANSC1   | -0.1971735 | 9.07762709 | -4.0812297 | 0.00071463 | 0.02464532 | -0.3865116 |
| NFU1     | -0.1971866 | 8.01526895 | -3.7541902 | 0.0014754  | 0.03590904 | -1.0713331 |
| ACSBG1   | -0.1973576 | 8.4924128  | -6.1708591 | 8.35E-06   | 2.67E-03   | 3.81760026 |
| TMEM128  | -0.1979096 | 9.91595865 | -3.7774696 | 0.00140117 | 0.03495645 | -1.0226522 |
| ARCN1    | -0.1990303 | 7.92460342 | -5.5456297 | 3.01E-05   | 4.74E-03   | 2.61186295 |
| PIK3R4   | -0.1992865 | 8.10399151 | -4.0743332 | 0.00072562 | 0.02470159 | -0.400957  |
| RAD23B   | -0.2002297 | 10.355068  | -3.5072082 | 0.00254966 | 0.04804746 | -1.586116  |
| SNX3     | -0.200539  | 8.93641844 | -3.9123697 | 0.0010389  | 0.02955115 | -0.7402613 |
| FGF1     | -0.2017156 | 9.16304371 | -4.8390269 | 0.00013556 | 0.01047438 | 1.18848617 |
| PKIG     | -0.2048577 | 8.56107276 | -3.9798748 | 0.00089451 | 0.0268174  | -0.5988443 |
| UCHL5    | -0.2052889 | 9.55696917 | -4.5953993 | 0.00023036 | 0.01389107 | 0.68597366 |
| RGS4     | -0.2056235 | 12.4503255 | -4.9279685 | 0.00011185 | 9.55E-03   | 1.37064609 |
| CCK      | -0.2060288 | 12.1736661 | -3.98368   | 0.00088699 | 0.0268174  | -0.590872  |
| PAFAH1B1 | -0.2069343 | 9.10718414 | -5.217294  | 6.02E-05   | 0.00721472 | 1.9575959  |
| LIN7C    | -0.2075546 | 8.14118018 | -3.7532667 | 0.00147843 | 0.03590904 | -1.0732638 |
| CASC4    | -0.2083389 | 8.50957512 | -4.7499668 | 0.00016446 | 0.01109412 | 1.00535749 |
| ABHD3    | -0.2092438 | 8.45255252 | -4.4239935 | 0.00033542 | 0.01616282 | 0.32983238 |
| SYNGR1   | -0.2092784 | 9.28063683 | -5.0127026 | 9.32E-05   | 0.00902024 | 1.5434676  |
| PHF14    | -0.2096679 | 7.97948142 | -4.5593334 | 0.00024926 | 0.01437426 | 0.61119423 |
| CAMKK2   | -0.2109883 | 9.58144867 | -4.5673969 | 0.0002449  | 0.01437426 | 0.62792083 |
| MRPL20   | -0.2112007 | 10.2726085 | -3.7583026 | 0.00146201 | 0.03588045 | -1.0627347 |
| PRKAR1B  | -0.2117456 | 10.7502053 | -4.4483009 | 0.00031797 | 0.0158282  | 0.38044601 |
| TJP1     | -0.2117841 | 8.39715144 | -3.5033697 | 0.00257139 | 4.82E-02   | -1.5940842 |
| TOP2B    | -0.2120287 | 7.58370864 | -5.6673521 | 2.34E-05   | 0.00448154 | 2.85089227 |
| TMEM32   | -0.2141034 | 8.91632432 | -3.8878006 | 0.00109706 | 0.0302378  | -0.7917203 |
| PTN      | -0.2154757 | 11.8384157 | -5.4720654 | 3.51E-05   | 0.00489116 | 2.46645274 |

|             |            |            |            |            |            |            |
|-------------|------------|------------|------------|------------|------------|------------|
| CYB5        | -0.2162946 | 9.14013625 | -4.0110535 | 0.00083479 | 0.02626261 | -0.5335219 |
| LOC1000441  | -0.2163858 | 8.50961321 | -4.3091162 | 0.00043192 | 0.01879399 | 0.09022731 |
| 4931406C07I | -0.217141  | 8.32967179 | -5.6873232 | 2.24E-05   | 4.38E-03   | 2.88991893 |
| NECAB1      | -0.2182387 | 8.96109015 | -4.4490534 | 0.00031745 | 0.0158282  | 0.38201224 |
| ITGB5       | -0.2187978 | 8.32544989 | -5.4282311 | 3.85E-05   | 5.26E-03   | 2.37947584 |
| ALDOA       | -0.2196041 | 12.5394842 | -4.4852829 | 0.00029318 | 0.01546967 | 0.45738625 |
| PPP1R3C     | -0.2199865 | 10.5177547 | -4.9724692 | 0.00010162 | 0.00940662 | 1.46149919 |
| PPP2R2C     | -0.2200551 | 10.2792603 | -4.020888  | 0.0008168  | 0.02596293 | -0.5129179 |
| VCL         | -0.2213409 | 9.080144   | -3.6582041 | 0.00182523 | 0.03979618 | -1.2718156 |
| SEC11C      | -0.2228565 | 9.80396357 | -4.0105957 | 0.00083564 | 0.02626261 | -0.534481  |
| RWDD4A      | -0.2230987 | 8.63784731 | -4.5624506 | 0.00024757 | 0.01437426 | 0.61766087 |
| KIRREL3     | -0.2237499 | 8.25142211 | -4.8073395 | 0.0001452  | 0.0106406  | 1.1234098  |
| SEPP1       | -0.22404   | 8.72668434 | -5.1405969 | 7.09E-05   | 0.00803443 | 1.80289145 |
| DUSP6       | -0.22407   | 10.1133136 | -3.9149815 | 0.0010329  | 0.02945992 | -0.7347906 |
| LOC1000467  | -0.2245433 | 8.17221881 | -5.3862149 | 4.21E-05   | 5.55E-03   | 2.29587811 |
| NAP1L3      | -0.224871  | 9.23351286 | -3.8854541 | 0.00110279 | 0.03024524 | -0.7966346 |
| PPP2R2B     | -0.2257091 | 9.40838835 | -3.866222  | 0.00115084 | 0.03081715 | -0.836908  |
| ATAD1       | -0.2257358 | 9.88655588 | -5.1092714 | 7.58E-05   | 0.00824206 | 1.73951447 |
| PI4KA       | -0.2257782 | 10.1724236 | -4.4657791 | 0.000306   | 0.01567591 | 0.41681884 |
| PTPRA       | -0.2262692 | 8.98679885 | -4.238765  | 0.00050444 | 0.02016841 | -0.0567864 |
| MXI1        | -0.2267802 | 8.45878813 | -3.6534073 | 0.00184473 | 0.03999989 | -1.2818225 |
| SELK        | -0.227769  | 10.2966912 | -5.0428531 | 8.73E-05   | 0.00874856 | 1.6047837  |
| OSBP2       | -0.2300977 | 9.0516124  | -3.6337937 | 0.00192666 | 0.04037166 | -1.322727  |
| ARNT2       | -0.2309333 | 8.71759867 | -4.1344409 | 0.00063524 | 0.02287963 | -0.275079  |
| SLC24A3     | -0.23207   | 11.6875339 | -4.2013866 | 0.00054785 | 0.02149254 | -0.1349651 |
| RFWD2       | -0.2321419 | 8.86329785 | -4.5401206 | 0.00025997 | 0.01478734 | 0.57132196 |
| PRMT8       | -0.2323778 | 9.22871897 | -5.1684126 | 6.68E-05   | 0.00765854 | 1.85907552 |
| HSF2        | -0.2325131 | 7.9405795  | -4.1653342 | 0.00059329 | 0.02207153 | -0.2104077 |
| NDUFB2      | -0.2344496 | 8.82695992 | -3.922792  | 0.00101517 | 0.02925189 | -0.71843   |
| TBC1D19     | -0.2345255 | 8.62820636 | -4.9787711 | 0.00010025 | 0.00936197 | 1.47434911 |
| MDH2        | -0.2351998 | 10.058944  | -4.4769589 | 0.00029858 | 0.01567591 | 0.44007544 |
| SEL1L       | -0.2355171 | 8.58912388 | -3.8631922 | 0.00115859 | 0.03087535 | -0.843252  |
| GAD1        | -0.2358886 | 12.3212895 | -5.6029221 | 2.67E-05   | 0.00453347 | 2.7246168  |
| DLD         | -0.2362858 | 9.03552759 | -3.8651833 | 0.00115349 | 0.03081715 | -0.839083  |
| CDH22       | -0.2362956 | 7.89125551 | -4.2318    | 0.00051226 | 2.03E-02   | -0.0713507 |
| CLSTN1      | -0.2371662 | 10.0844727 | -6.0928238 | 9.77E-06   | 2.92E-03   | 3.67018526 |
| CACYBP      | -0.2380646 | 8.2375256  | -5.1303269 | 7.24E-05   | 0.00804507 | 1.78212549 |
| PPM1L       | -0.2381145 | 10.4327393 | -5.0367073 | 8.85E-05   | 0.00874856 | 1.59229293 |
| PTGES3      | -0.2381442 | 9.39721669 | -6.5800424 | 3.71E-06   | 2.17E-03   | 4.57551004 |
| COX7B       | -0.2384971 | 9.23467748 | -4.0248064 | 0.00080974 | 0.0258163  | -0.5047088 |
| RASSF3      | -0.2386374 | 8.62985941 | -4.5716562 | 0.00024263 | 1.44E-02   | 0.63675458 |
| LOC1000468  | -0.239122  | 8.8553679  | -4.238672  | 0.00050454 | 0.02016841 | -0.0569808 |
| ZFML        | -0.2397068 | 9.66136903 | -3.9190192 | 0.00102369 | 0.02934    | -0.7263329 |

|             |            |            |            |            |            |            |
|-------------|------------|------------|------------|------------|------------|------------|
| PMPCB       | -0.2397606 | 8.51325408 | -5.0650934 | 8.33E-05   | 0.00870122 | 1.64995148 |
| IAP         | -0.2417125 | 11.1988469 | -3.8450705 | 0.0012061  | 0.0317664  | -0.8811926 |
| GSTM5       | -0.2417395 | 11.4669217 | -4.4273463 | 0.00033295 | 1.61E-02   | 0.33681563 |
| TYKI        | -0.244149  | 8.79212827 | -6.6413004 | 3.29E-06   | 2.04E-03   | 4.6867605  |
| CLCN4-2     | -0.2456994 | 8.23215412 | -5.4705299 | 3.52E-05   | 0.00489116 | 2.46341004 |
| EVL         | -0.2461018 | 10.0572227 | -6.0204068 | 1.13E-05   | 3.04E-03   | 3.5325778  |
| NDRG2       | -0.2463635 | 9.48164458 | -5.4998138 | 3.31E-05   | 4.82E-03   | 2.52138396 |
| FGF12       | -0.2468643 | 9.61837415 | -5.928322  | 1.36E-05   | 3.33E-03   | 3.35649054 |
| LOC1000477  | -0.247057  | 9.24341442 | -4.2256189 | 0.0005193  | 0.02052494 | -0.0842772 |
| TOMM70A     | -0.2508782 | 9.46477595 | -4.3917911 | 0.00036003 | 0.01666395 | 0.26273105 |
| LOC1000417  | -0.2515943 | 7.83273804 | -4.4983327 | 0.00028491 | 0.0154186  | 0.48451675 |
| IDH2        | -0.2517951 | 9.18773007 | -4.0574508 | 0.00075326 | 0.02525567 | -0.4363208 |
| RGS10       | -0.2521589 | 9.90840422 | -6.4029468 | 5.25E-06   | 2.60E-03   | 4.2506238  |
| FAM134A     | -0.2556575 | 10.5122235 | -4.1055569 | 0.00067717 | 0.02390011 | -0.3355611 |
| GJB6        | -0.2560492 | 10.7561347 | -3.8064935 | 0.00131383 | 0.03357103 | -0.9619334 |
| LOC1000444  | -0.2562376 | 11.0557537 | -4.8443139 | 0.00013402 | 0.01047438 | 1.19933507 |
| NLGN1       | -0.25734   | 8.14182766 | -4.8075099 | 0.00014514 | 1.06E-02   | 1.12375995 |
| SNAP91      | -0.2586765 | 8.62884003 | -3.8420524 | 0.0012142  | 0.0317664  | -0.8875108 |
| FOXG1       | -0.2590973 | 10.7068772 | -3.4981954 | 0.00260097 | 0.04848053 | -1.6048232 |
| A530082C11  | -0.2602531 | 8.56951605 | -5.6542509 | 2.40E-05   | 4.52E-03   | 2.82526088 |
| ALDH1A1     | -0.2606003 | 7.92979    | -5.789918  | 1.81E-05   | 3.90E-03   | 3.08953921 |
| RELL2       | -0.261073  | 10.5292788 | -4.8342377 | 0.00013697 | 0.01047438 | 1.17865626 |
| GPM6A       | -0.2624029 | 10.3294071 | -5.820415  | 1.70E-05   | 3.74E-03   | 3.14859485 |
| PAIP2       | -0.2631944 | 10.3312977 | -3.5511907 | 0.00231331 | 0.04544954 | -1.4947313 |
| ADAM9       | -0.263297  | 8.77264722 | -6.4002743 | 5.28E-06   | 2.60E-03   | 4.24568411 |
| KCNK2       | -0.2666458 | 8.96448927 | -4.98485   | 9.89E-05   | 9.36E-03   | 1.48674055 |
| SMPD4       | -0.2668337 | 8.12718492 | -3.761587  | 0.0014514  | 0.03570311 | -1.0558673 |
| PIK3CA      | -0.2692312 | 7.84708796 | -5.038058  | 8.83E-05   | 8.75E-03   | 1.59503844 |
| P2RY12      | -0.2692981 | 8.52596033 | -6.0705098 | 1.02E-05   | 2.92E-03   | 3.62786627 |
| DYNLT3      | -0.2697386 | 11.6152294 | -6.0743402 | 1.01E-05   | 0.00291503 | 3.63513596 |
| NPY         | -0.2701757 | 11.0205184 | -7.1147226 | 1.33E-06   | 1.27E-03   | 5.52675332 |
| LOC668837   | -0.2715451 | 9.74082912 | -4.1023243 | 0.00068203 | 0.02392393 | -0.3423308 |
| GPM6B       | -0.2843532 | 8.30149019 | -5.2486402 | 5.63E-05   | 6.91E-03   | 2.02062838 |
| CCNG2       | -0.2849152 | 9.25756986 | -5.8930387 | 1.47E-05   | 0.00343977 | 3.28869608 |
| STMN1       | -0.2858392 | 10.8422583 | -3.8929183 | 0.00108468 | 0.03014745 | -0.7810023 |
| ABCC10      | -0.2858719 | 7.64549569 | -4.2402412 | 0.0005028  | 0.02016841 | -0.0536998 |
| S100B       | -0.2866502 | 7.76645434 | -6.754684  | 2.64E-06   | 1.84E-03   | 4.89113481 |
| LOC1000484  | -0.2879513 | 11.0847746 | -3.8452786 | 0.00120555 | 0.0317664  | -0.8807568 |
| 6330577E15I | -0.2880153 | 8.56399213 | -4.6824194 | 0.0001905  | 0.01225849 | 0.86601382 |
| FAM107A     | -0.2886275 | 11.5640312 | -4.0447713 | 0.00077471 | 0.02526478 | -0.4628826 |
| CYFIP2      | -0.2933438 | 10.3946373 | -3.7810543 | 0.00139008 | 0.03482135 | -1.0151543 |
| GLRX3       | -0.293824  | 9.16640062 | -4.951497  | 0.00010631 | 0.00954633 | 1.41870675 |
| KPNB1       | -0.295192  | 10.2243301 | -5.1783618 | 6.54E-05   | 0.00758014 | 1.87915031 |

|            |            |            |            |            |            |            |
|------------|------------|------------|------------|------------|------------|------------|
| SLC25A4    | -0.2976257 | 7.74603557 | -3.720055  | 0.0015914  | 0.03701346 | -1.1426775 |
| UBE2J1     | -0.3014377 | 8.76611148 | -6.3368741 | 5.99E-06   | 0.00259952 | 4.12817879 |
| GLRX2      | -0.301634  | 8.89396468 | -5.6025249 | 2.67E-05   | 4.53E-03   | 2.72383663 |
| PLA2G7     | -0.3025829 | 8.28695336 | -4.2180155 | 0.00052809 | 0.02079464 | -0.1001798 |
| HSD11B1    | -0.3056531 | 9.32102244 | -5.7480954 | 1.98E-05   | 0.00417076 | 3.00834058 |
| SEPT7      | -0.306195  | 8.20691273 | -5.6269663 | 2.54E-05   | 0.00453347 | 2.77180628 |
| RORA       | -0.3063278 | 8.98348808 | -6.1755063 | 8.27E-06   | 2.67E-03   | 3.82635052 |
| SLC7A10    | -0.3170964 | 8.63636723 | -9.2966724 | 2.98E-08   | 3.14E-04   | 8.95052775 |
| TRIM37     | -0.3224632 | 11.0173666 | -4.2695826 | 0.00047127 | 0.0196574  | 0.00763596 |
| SLC12A5    | -0.3303709 | 8.21189792 | -5.4918668 | 3.37E-05   | 4.82E-03   | 2.50566211 |
| MAP1LC3B   | -0.3332635 | 9.9737923  | -3.7873352 | 0.00137085 | 0.03461981 | -1.002016  |
| DDX3X      | -0.3413857 | 9.46155714 | -3.7052833 | 0.00164438 | 0.03757425 | -1.1735358 |
| SCN1A      | -0.3450592 | 10.2520814 | -5.9635112 | 1.27E-05   | 0.00326922 | 3.42392571 |
| A030009H04 | -0.3517367 | 9.0145     | -4.6531849 | 0.00020304 | 1.28E-02   | 0.80559285 |
| FOS        | -0.3549308 | 9.76647721 | -6.2361678 | 7.32E-06   | 0.00259952 | 3.94027465 |
| ID2        | -0.3554898 | 9.26615316 | -4.4661966 | 0.00030572 | 0.01567591 | 0.41768756 |
| GLUL       | -0.3688954 | 8.42803552 | -5.5678209 | 2.87E-05   | 0.00466505 | 2.65558787 |
| SETD3      | -0.3691924 | 9.38776346 | -3.8397178 | 0.00122051 | 0.0317664  | -0.8923978 |
| NDRG4      | -0.3746447 | 12.0568899 | -4.6209895 | 0.00021783 | 0.01353358 | 0.73897696 |
| LOC1000485 | -0.3805732 | 8.46021607 | -7.8761877 | 3.29E-07   | 6.59E-04   | 6.80399782 |
| PDZRN3     | -0.3813116 | 9.21724556 | -3.7361858 | 0.00153549 | 0.0363793  | -1.108969  |
| LPGAT1     | -0.3814508 | 8.4351187  | -4.6712827 | 0.00019519 | 0.0124836  | 0.84300466 |
| ATP5A1     | -0.3816518 | 10.8903379 | -3.9059999 | 0.00105367 | 0.02973106 | -0.7536034 |
| NDUFB5     | -0.387066  | 10.2090556 | -3.9492794 | 0.00095727 | 0.0283173  | -0.6629427 |
| JAK1       | -0.3873114 | 8.62220612 | -5.9200405 | 1.39E-05   | 3.33E-03   | 3.3405942  |
| PTGDS      | -0.3907285 | 9.92990529 | -5.2980302 | 5.07E-05   | 6.50E-03   | 2.11970822 |
| MAP2K1     | -0.4182157 | 9.56538826 | -6.9581913 | 1.79E-06   | 0.00145025 | 5.25291244 |
| SPARCL1    | -0.419559  | 10.7264921 | -4.9297217 | 0.00011142 | 0.00954633 | 1.37422912 |
| HUWE1      | -0.4261975 | 9.57806109 | -6.3016232 | 6.42E-06   | 2.60E-03   | 4.06258023 |
| ARC        | -0.4269303 | 10.6445515 | -5.9424939 | 1.33E-05   | 3.33E-03   | 3.38367059 |
| DUSP1      | -0.4665203 | 10.5911814 | -7.411806  | 7.64E-07   | 0.0010072  | 6.03587649 |
| NPAS4      | -0.4786863 | 8.18395513 | -7.4810389 | 6.72E-07   | 1.01E-03   | 6.15253048 |
| NEFM       | -0.4893661 | 10.0428796 | -4.1546125 | 0.00060753 | 0.02233879 | -0.23285   |



**DEGs in susceptible mPFC**

adj.P.Value &lt; 0.05

DEGup 246

DEGdown 262

| Gene      | logFC    | AveExpr  | t        | P.Value   | adj.P.Val | B          |
|-----------|----------|----------|----------|-----------|-----------|------------|
| HBA-A1    | 0.96897  | 12.60395 | 12.27137 | 7.12E-10  | 7.51E-06  | 1.21E+01   |
| HBB-B1    | 0.521643 | 8.799639 | 5.777767 | 2.23E-05  | 4.67E-03  | 2.9152003  |
| SLA       | 0.375319 | 8.890923 | 3.710512 | 0.001737  | 0.0422373 | -1.2241965 |
| SGK1      | 0.353696 | 11.44792 | 9.320597 | 4.29E-08  | 1.51E-04  | 8.66E+00   |
| FDPS      | 0.343828 | 10.83188 | 6.688559 | 3.81E-06  | 1.99E-03  | 4.5755552  |
| ALAS2     | 0.340133 | 7.583163 | 6.373514 | 6.92E-06  | 0.002353  | 4.0155208  |
| STK32C    | 0.335002 | 9.137387 | 7.370428 | 1.09E-06  | 0.0009948 | 5.7345498  |
| FUS       | 0.331593 | 8.26822  | 6.830087 | 2.92E-06  | 1.71E-03  | 4.8221066  |
| PFDN2     | 0.330036 | 11.04169 | 4.745774 | 0.000187  | 1.31E-02  | 0.894604   |
| CCDC85B   | 0.325464 | 10.26655 | 5.333016 | 5.49E-05  | 7.33E-03  | 2.0605731  |
| GABARAPL1 | 0.312178 | 11.87212 | 5.840394 | 1.97E-05  | 0.0044123 | 3.0333366  |
| AHI1      | 0.305951 | 10.57708 | 7.449293 | 9.49E-07  | 9.95E-04  | 5.863904   |
| STMN4     | 0.287774 | 9.660887 | 9.03581  | 6.68E-08  | 1.61E-04  | 8.2656348  |
| DLG4      | 0.284037 | 9.496925 | 6.219446 | 9.32E-06  | 2.46E-03  | 3.7360727  |
| COL6A1    | 0.277368 | 9.225453 | 3.661475 | 0.0019322 | 0.0440791 | -1.3249574 |
| SUMO3     | 0.270987 | 9.241103 | 5.450956 | 4.31E-05  | 6.32E-03  | 2.2897973  |
| NME2      | 0.267915 | 10.32974 | 6.338699 | 7.40E-06  | 2.35E-03  | 3.9526914  |
| DYNLL2    | 0.263819 | 8.9233   | 7.685176 | 6.27E-07  | 0.0008018 | 6.2450346  |
| RASL10A   | 0.259366 | 9.588202 | 6.284711 | 8.22E-06  | 2.35E-03  | 3.854893   |
| KLF16     | 0.25796  | 8.781993 | 4.963057 | 0.0001183 | 1.08E-02  | 1.3304385  |
| CRYM      | 0.255724 | 11.54698 | 4.268398 | 0.0005188 | 0.0223847 | -0.0768859 |
| FEZF2     | 0.254711 | 9.724721 | 5.430714 | 4.49E-05  | 0.0063204 | 2.2505848  |
| VPS25     | 0.254683 | 8.981466 | 8.217767 | 2.52E-07  | 3.80E-04  | 7.0741714  |
| RAMP3     | 0.253779 | 8.392446 | 5.510355 | 3.82E-05  | 6.20E-03  | 2.4045524  |
| NTSR1     | 0.250128 | 8.087294 | 3.846251 | 0.0012936 | 3.63E-02  | -0.944939  |
| ACTR1A    | 0.244134 | 10.82985 | 4.112645 | 0.0007262 | 2.70E-02  | -0.3966898 |
| SLC38A5   | 0.2425   | 8.130117 | 6.477345 | 5.68E-06  | 2.22E-03  | 4.2017943  |
| CDH13     | 0.242017 | 8.439697 | 7.635214 | 6.84E-07  | 8.02E-04  | 6.1650265  |
| RPS26     | 0.240258 | 11.85228 | 5.002186 | 0.000109  | 0.0105524 | 1.4084067  |
| ARHGEF15  | 0.23718  | 8.08675  | 7.029222 | 2.02E-06  | 1.42E-03  | 5.1636991  |
| SLC35E3   | 0.235561 | 9.527682 | 4.523534 | 0.0003001 | 1.62E-02  | 0.4443605  |
| COL5A1    | 0.235437 | 8.052943 | 5.883601 | 1.80E-05  | 4.14E-03  | 3.1145111  |
| HRMT1L2   | 0.235143 | 10.48449 | 6.237518 | 9.00E-06  | 2.44E-03  | 3.7690386  |
| P140      | 0.234813 | 8.305353 | 6.500707 | 5.43E-06  | 2.22E-03  | 4.2434774  |
| TCEAL3    | 0.233308 | 8.924958 | 7.307184 | 1.22E-06  | 9.95E-04  | 5.6301154  |
| LY6A      | 0.231051 | 9.565472 | 5.311914 | 5.73E-05  | 7.47E-03  | 2.0193709  |
| RPS4Y2    | 0.230432 | 7.95517  | 5.675745 | 2.73E-05  | 5.32E-03  | 2.7215548  |



|               |          |          |          |           |           |            |
|---------------|----------|----------|----------|-----------|-----------|------------|
| STXBP2        | 0.225695 | 9.009519 | 3.794967 | 0.001446  | 0.0382441 | -1.05049   |
| PRR7          | 0.224276 | 9.384036 | 6.415535 | 6.39E-06  | 2.25E-03  | 4.0911074  |
| PTPRU         | 0.222252 | 8.320852 | 3.8093   | 0.0014017 | 0.0379276 | -1.0209927 |
| ST3GAL5       | 0.217225 | 9.919604 | 4.919403 | 0.0001297 | 0.010859  | 1.2432604  |
| ANAPC5        | 0.213799 | 10.00353 | 4.373534 | 0.0004138 | 1.96E-02  | 0.138378   |
| DGKG          | 0.213623 | 10.63397 | 5.488186 | 3.99E-05  | 6.30E-03  | 2.3617781  |
| BLMH          | 0.213411 | 8.428104 | 4.728392 | 0.000194  | 1.31E-02  | 0.8595418  |
| COTL1         | 0.211301 | 9.645081 | 4.283494 | 0.0005022 | 0.022131  | -0.045943  |
| TSC22D1       | 0.210839 | 9.097877 | 4.639701 | 0.0002342 | 0.0142703 | 0.680217   |
| SNRPD3        | 0.210506 | 10.62739 | 3.800386 | 0.0014291 | 0.038148  | -1.0393382 |
| HNRNPK        | 0.210168 | 8.520658 | 5.149467 | 8.02E-05  | 8.81E-03  | 1.7003466  |
| GABBR1        | 0.210083 | 8.463038 | 6.577975 | 4.69E-06  | 2.06E-03  | 4.3807329  |
| LOC100045019  | 0.209417 | 11.22315 | 4.858408 | 0.0001474 | 1.18E-02  | 1.1211183  |
| CCL21A        | 0.208936 | 9.212146 | 5.740611 | 2.40E-05  | 4.78E-03  | 2.8448463  |
| EEF2          | 0.207607 | 8.350257 | 5.463251 | 4.20E-05  | 6.30E-03  | 2.3135897  |
| 5430437P03RIK | 0.207007 | 9.352445 | 4.451291 | 0.0003502 | 0.0178553 | 0.2971767  |
| GPN3          | 0.202006 | 8.406506 | 4.629542 | 0.0002394 | 0.014362  | 0.6596341  |
| EG434858      | 0.200346 | 8.69901  | 4.755006 | 0.0001834 | 1.30E-02  | 0.9132145  |
| YRDC          | 0.199725 | 8.128247 | 5.070903 | 9.44E-05  | 9.67E-03  | 1.5449252  |
| LSM8          | 0.198161 | 9.56242  | 4.828431 | 0.000157  | 1.20E-02  | 1.060952   |
| 6430598A04RIK | 0.195497 | 8.393332 | 5.156959 | 7.89E-05  | 0.008814  | 1.7151298  |
| DBR1          | 0.195252 | 8.708354 | 4.307957 | 0.0004765 | 0.0213636 | 0.0041774  |
| SYT5          | 0.193934 | 10.3186  | 4.675625 | 0.000217  | 0.0137081 | 0.7529338  |
| WDR61         | 0.193291 | 9.834414 | 4.383418 | 0.0004051 | 1.93E-02  | 0.1585836  |
| LOC100043257  | 0.192503 | 9.951471 | 4.839015 | 0.0001536 | 0.0118285 | 1.0822052  |
| SFRS5         | 0.191888 | 10.07632 | 4.939203 | 0.0001244 | 0.0107935 | 1.2828262  |
| ARL6IP1       | 0.190973 | 12.59459 | 3.923816 | 0.0010932 | 0.0331516 | -0.7852561 |
| STARD3NL      | 0.190548 | 8.993388 | 5.104881 | 8.80E-05  | 9.27E-03  | 1.6122309  |
| PPARGC1B      | 0.190331 | 9.531282 | 4.432922 | 0.0003643 | 0.0181667 | 0.2596963  |
| GPS1          | 0.18938  | 10.67956 | 3.784986 | 0.0014777 | 0.0389665 | -1.0710273 |
| SLC8A2        | 0.188883 | 8.434484 | 4.462843 | 0.0003417 | 0.0175889 | 0.3207354  |
| TATDN2        | 0.18849  | 8.410132 | 5.089178 | 9.09E-05  | 0.0094037 | 1.5811418  |
| EIF3D         | 0.187682 | 10.47309 | 4.510055 | 0.0003088 | 0.0164608 | 0.4169253  |
| MAGI2         | 0.186419 | 7.583132 | 5.055147 | 9.76E-05  | 9.81E-03  | 1.5136706  |
| D430041B17RIK | 0.185478 | 9.123235 | 5.113147 | 8.65E-05  | 0.0092572 | 1.6285846  |
| KCNQ2         | 0.185358 | 7.858577 | 5.93669  | 1.62E-05  | 0.0038929 | 3.2138782  |
| EXTL1         | 0.185254 | 8.809089 | 4.969555 | 0.0001167 | 0.0107092 | 1.343398   |
| IVNS1ABP      | 0.184364 | 8.896972 | 4.820059 | 0.0001598 | 0.0121341 | 1.0441338  |
| VTI1B         | 0.184284 | 12.22503 | 4.685603 | 0.0002125 | 0.0135885 | 0.7731115  |
| KCTD10        | 0.184139 | 9.086462 | 4.276568 | 0.0005098 | 0.0222307 | -0.0601382 |
| ERP29         | 0.183951 | 11.32563 | 3.861814 | 0.0012507 | 0.0355744 | -0.9129027 |
| DYNC1H1       | 0.182527 | 10.29217 | 3.588179 | 0.0022655 | 0.0480161 | -1.4753765 |
| MED6          | 0.181982 | 8.938034 | 5.800617 | 2.13E-05  | 4.67E-03  | 2.9583697  |

|               |          |          |          |           |           |            |
|---------------|----------|----------|----------|-----------|-----------|------------|
| COG1          | 0.181903 | 8.320809 | 5.433429 | 4.47E-05  | 0.0063204 | 2.2558479  |
| MRPL10        | 0.181203 | 10.16936 | 5.111063 | 8.68E-05  | 0.0092572 | 1.6244625  |
| NME5          | 0.181176 | 9.103259 | 3.884113 | 0.0011916 | 0.0346408 | -0.8669952 |
| CXX1C         | 0.180428 | 10.42897 | 4.386679 | 0.0004023 | 1.92E-02  | 0.1652488  |
| LOC100046136  | 0.180234 | 8.011977 | 4.579075 | 0.0002665 | 0.0152033 | 0.557257   |
| DUS4L         | 0.179894 | 8.419626 | 6.434088 | 6.17E-06  | 2.24E-03  | 4.1243929  |
| EG633640      | 0.178736 | 7.723142 | 5.483442 | 4.03E-05  | 6.30E-03  | 2.3526179  |
| CSTB          | 0.177749 | 11.04008 | 3.966763 | 0.000996  | 3.19E-02  | -0.6968424 |
| 0610006I08RIK | 0.177621 | 10.29162 | 4.57205  | 0.0002705 | 1.53E-02  | 0.5429912  |
| DYNC111       | 0.17761  | 9.345363 | 4.98926  | 0.000112  | 0.0105759 | 1.3826696  |
| EGFL7         | 0.177327 | 8.768657 | 5.326308 | 5.56E-05  | 7.34E-03  | 2.0474829  |
| CLPP          | 0.177278 | 8.906726 | 4.306705 | 0.0004778 | 0.0213636 | 0.0016131  |
| LMO3          | 0.177237 | 8.373424 | 3.69369  | 0.0018017 | 0.0428221 | -1.2587713 |
| ABHD14B       | 0.177129 | 9.130865 | 3.918679 | 0.0011055 | 3.32E-02  | -0.7958329 |
| KLF5          | 0.176321 | 8.790538 | 3.798994 | 0.0014334 | 0.038148  | -1.0422022 |
| NRBP2         | 0.175352 | 10.27506 | 4.091024 | 0.000761  | 2.77E-02  | -0.441149  |
| ATP2B1        | 0.174848 | 9.343558 | 4.048046 | 0.0008352 | 0.0288505 | -0.5295543 |
| EXOC4         | 0.174501 | 8.785003 | 5.593306 | 3.23E-05  | 5.77E-03  | 2.5640136  |
| DCTN1         | 0.174233 | 9.172176 | 4.481226 | 0.0003285 | 1.72E-02  | 0.3582078  |
| EXOSC7        | 0.174096 | 10.0605  | 4.988152 | 0.0001122 | 0.0105759 | 1.3804623  |
| RAB3GAP2      | 0.171332 | 9.081676 | 3.718223 | 0.0017082 | 0.0420782 | -1.2083428 |
| 2610208M17RIK | 0.170598 | 9.261427 | 3.723584 | 0.0016884 | 4.19E-02  | -1.197321  |
| TMEM132D      | 0.170478 | 8.122685 | 4.192687 | 0.0006109 | 0.0242902 | -0.2322284 |
| ORC6L         | 0.170426 | 9.613107 | 4.755003 | 0.0001834 | 1.30E-02  | 0.9132086  |
| RASAL1        | 0.170138 | 8.861191 | 3.624383 | 0.0020943 | 4.59E-02  | -1.4011091 |
| LOR           | 0.170118 | 9.268759 | 4.237152 | 0.000555  | 0.0232414 | -0.1409663 |
| PSME2         | 0.170043 | 7.759331 | 4.423677 | 0.0003716 | 1.83E-02  | 0.2408252  |
| MED30         | 0.167486 | 10.05659 | 4.20822  | 0.0005907 | 0.023977  | -0.2003383 |
| NRBF2         | 0.167154 | 8.808702 | 4.081057 | 0.0007776 | 0.028006  | -0.4616478 |
| JTV1          | 0.16656  | 8.567839 | 5.45987  | 4.23E-05  | 0.0062998 | 2.3070494  |
| SLC25A44      | 0.165965 | 9.873773 | 3.74139  | 0.0016244 | 0.0411081 | -1.1607075 |
| BEX4          | 0.165344 | 9.108064 | 4.208711 | 0.0005901 | 0.023977  | -0.1993319 |
| TDRD7         | 0.164357 | 9.563536 | 4.926076 | 0.0001278 | 1.08E-02  | 1.2565981  |
| POLD2         | 0.163387 | 8.169336 | 3.905699 | 0.001137  | 0.0336113 | -0.8225565 |
| BC002163      | 0.163137 | 11.47851 | 3.917963 | 0.0011072 | 0.0331738 | -0.7973062 |
| SAMD14        | 0.163113 | 9.194004 | 3.915457 | 0.0011132 | 0.0331738 | -0.8024653 |
| PIGK          | 0.161865 | 7.897873 | 4.979266 | 0.0001144 | 0.0105855 | 1.362757   |
| SUHW4         | 0.161747 | 9.016089 | 3.909671 | 0.0011273 | 0.0334165 | -0.8143785 |
| ZFP282        | 0.161625 | 8.667863 | 4.415859 | 0.0003779 | 0.0184617 | 0.2248618  |
| TCTEX1D2      | 0.161564 | 10.06042 | 3.633916 | 0.0020514 | 0.045575  | -1.3815429 |
| 2700094K13RIK | 0.161077 | 10.63579 | 4.169651 | 0.000642  | 2.50E-02  | -0.2795383 |
| ARL2BP        | 0.160048 | 8.993257 | 5.554768 | 3.49E-05  | 0.0060366 | 2.4900464  |
| G3BP1         | 0.159936 | 8.93059  | 3.748665 | 0.0015989 | 0.0408557 | -1.145746  |

|               |          |          |          |           |           |            |
|---------------|----------|----------|----------|-----------|-----------|------------|
| MAPK1         | 0.159414 | 11.3214  | 4.558754 | 0.0002783 | 0.0153781 | 0.5159785  |
| B9D1          | 0.158822 | 8.634567 | 3.841866 | 0.001306  | 3.64E-02  | -0.9539657 |
| GM1821        | 0.158647 | 14.51018 | 4.298726 | 0.000486  | 2.16E-02  | -0.0147312 |
| DPYSL5        | 0.157953 | 7.951066 | 4.143668 | 0.0006791 | 2.60E-02  | -0.3329226 |
| LOC100047707  | 0.157641 | 10.11424 | 3.708051 | 0.0017463 | 0.0422478 | -1.2292545 |
| VWF           | 0.156394 | 7.58027  | 3.928077 | 0.0010832 | 3.29E-02  | -0.7764846 |
| CLPTM1L       | 0.155821 | 10.78891 | 3.936663 | 0.0010632 | 3.29E-02  | -0.7588084 |
| XAB1          | 0.155755 | 9.11145  | 4.213384 | 0.0005842 | 0.023977  | -0.1897391 |
| UQCRC2        | 0.155417 | 12.55515 | 3.597734 | 0.002219  | 0.0473959 | -1.455784  |
| DDR1          | 0.155245 | 8.746017 | 3.614508 | 0.0021397 | 4.64E-02  | -1.4213743 |
| TUBB5         | 0.15446  | 13.47496 | 3.91566  | 0.0011127 | 3.32E-02  | -0.8020471 |
| MMP24         | 0.154416 | 9.045771 | 4.175613 | 0.0006338 | 0.0249577 | -0.2672918 |
| CHMP4B        | 0.154031 | 9.648872 | 4.308419 | 0.000476  | 0.0213636 | 0.0051225  |
| RAP1GAP       | 0.153988 | 7.960334 | 3.756793 | 0.0015709 | 0.0403809 | -1.1290281 |
| SNRPD1        | 0.15382  | 10.48105 | 3.62394  | 0.0020963 | 0.0458891 | -1.4020197 |
| ZFP316        | 0.153078 | 7.801568 | 4.524038 | 0.0002997 | 0.0161733 | 0.4453853  |
| RANBP1        | 0.152317 | 10.34559 | 4.862056 | 0.0001463 | 0.0118285 | 1.1284332  |
| TOMM34        | 0.152252 | 9.343561 | 5.100615 | 8.88E-05  | 9.27E-03  | 1.6037867  |
| D11MOH35      | 0.152062 | 7.827309 | 5.242949 | 6.61E-05  | 0.0080139 | 1.8843282  |
| CASKIN1       | 0.151806 | 9.529345 | 4.641981 | 0.0002331 | 0.0142703 | 0.6848358  |
| HSF1          | 0.151512 | 9.898833 | 4.094285 | 0.0007556 | 2.76E-02  | -0.4344433 |
| TMEM147       | 0.150976 | 11.12406 | 3.734405 | 0.0016492 | 0.0414383 | -1.1750706 |
| D1BWG0212E    | 0.150937 | 8.263171 | 4.23078  | 0.0005627 | 0.0234699 | -0.1540405 |
| DPM1          | 0.15081  | 8.642563 | 4.840004 | 0.0001532 | 0.0118285 | 1.0841913  |
| ORF61         | 0.150677 | 9.498599 | 4.19159  | 0.0006123 | 2.43E-02  | -0.234481  |
| L7RN6         | 0.150631 | 10.17926 | 4.940003 | 0.0001242 | 0.0107935 | 1.2844237  |
| PSMD4         | 0.150562 | 11.68837 | 4.068033 | 0.0007998 | 2.84E-02  | -0.488435  |
| ATG16L1       | 0.149851 | 10.13511 | 4.162404 | 0.0006522 | 2.52E-02  | -0.2944254 |
| 2610507B11RIK | 0.14958  | 9.766797 | 5.062891 | 9.60E-05  | 0.0097424 | 1.529034   |
| SPRN          | 0.149176 | 8.000731 | 4.221884 | 0.0005736 | 0.0237992 | -0.1722947 |
| EIF2B5        | 0.148548 | 9.632521 | 4.170794 | 0.0006404 | 2.50E-02  | -0.2771915 |
| EXOSC2        | 0.147479 | 8.369204 | 4.089912 | 0.0007628 | 2.77E-02  | -0.443436  |
| HAX1          | 0.147245 | 8.016897 | 3.714377 | 0.0017225 | 4.21E-02  | -1.2162505 |
| ZNRD1         | 0.147203 | 9.229558 | 4.485498 | 0.0003255 | 1.72E-02  | 0.3669132  |
| ILK           | 0.146557 | 9.884983 | 4.171545 | 0.0006394 | 0.0250013 | -0.2756489 |
| YIF1B         | 0.14623  | 9.341596 | 3.997346 | 0.0009321 | 0.03036   | -0.6338885 |
| KHDRBS1       | 0.145987 | 8.73763  | 3.716203 | 0.0017157 | 4.21E-02  | -1.2124975 |
| JTB           | 0.14583  | 11.00039 | 4.22067  | 0.0005751 | 0.0237992 | -0.1747858 |
| PDE1B         | 0.145247 | 10.87632 | 3.665288 | 0.0019163 | 4.40E-02  | -1.317125  |
| UHRF2         | 0.145179 | 9.131067 | 4.162732 | 0.0006517 | 0.0252097 | -0.2937517 |
| ANKRD39       | 0.14504  | 8.27174  | 4.801524 | 0.0001662 | 0.0124395 | 1.0068733  |
| 1600014C10RIK | 0.14352  | 8.808375 | 3.719214 | 0.0017045 | 0.0420782 | -1.2063058 |
| BC031353      | 0.14319  | 9.414805 | 3.816844 | 0.0013789 | 0.0374075 | -1.0054679 |

|               |          |          |          |           |           |            |
|---------------|----------|----------|----------|-----------|-----------|------------|
| FAM116B       | 0.143188 | 9.604264 | 3.581605 | 0.0022981 | 4.84E-02  | -1.4888568 |
| PNKP          | 0.143153 | 8.659156 | 4.946329 | 0.0001225 | 0.0107935 | 1.2970562  |
| GRIA1         | 0.143123 | 10.18257 | 3.821763 | 0.0013642 | 0.037219  | -0.9953431 |
| SYVN1         | 0.142927 | 10.57354 | 4.069063 | 0.000798  | 2.84E-02  | -0.4863166 |
| KCNIP4        | 0.142649 | 7.685055 | 4.616144 | 0.0002463 | 1.45E-02  | 0.6324748  |
| HDGFRP2       | 0.142384 | 10.8939  | 4.059298 | 0.0008151 | 2.86E-02  | -0.5064043 |
| ING4          | 0.142228 | 8.670024 | 3.869869 | 0.001229  | 0.0353389 | -0.896321  |
| ZCCHC18       | 0.142209 | 12.89845 | 4.248317 | 0.0005418 | 2.29E-02  | -0.1180636 |
| VAPB          | 0.142164 | 9.065473 | 4.430168 | 0.0003665 | 0.0181667 | 0.2540762  |
| CXX1A         | 0.142075 | 8.073588 | 3.658833 | 0.0019433 | 4.41E-02  | -1.3303827 |
| UBE2L3        | 0.141729 | 11.23016 | 3.710858 | 0.0017357 | 0.0422373 | -1.2234837 |
| 1110002N22RIK | 0.141105 | 7.999189 | 4.067294 | 0.0008011 | 0.0283686 | -0.4899556 |
| SMARCD2       | 0.139967 | 8.141246 | 3.959369 | 0.0010121 | 0.0321708 | -0.7120641 |
| ZFP672        | 0.139931 | 9.711252 | 3.61077  | 0.0021571 | 0.0465516 | -1.4290428 |
| NUDT2         | 0.139819 | 8.030182 | 3.598642 | 0.0022146 | 0.0473959 | -1.4539203 |
| SIAT7F        | 0.139795 | 7.657323 | 4.637583 | 0.0002353 | 1.43E-02  | 0.6759273  |
| LMAN2L        | 0.139435 | 9.210995 | 3.689018 | 0.00182   | 0.0430189 | -1.2683727 |
| 2410004L22RIK | 0.139043 | 7.654476 | 3.797536 | 0.0014379 | 3.81E-02  | -1.0452022 |
| 5730410E15RIK | 0.138958 | 10.59782 | 3.621597 | 0.002107  | 4.59E-02  | -1.4068272 |
| PRDM4         | 0.138835 | 9.504693 | 4.600367 | 0.0002547 | 1.46E-02  | 0.6004748  |
| SSBP2         | 0.138831 | 9.144156 | 4.047276 | 0.0008366 | 2.89E-02  | -0.5311384 |
| RCL1          | 0.138223 | 8.423886 | 4.015698 | 0.0008958 | 0.0298208 | -0.5961193 |
| RALY          | 0.138174 | 9.379945 | 3.984811 | 0.0009578 | 0.0309099 | -0.6596899 |
| ATP5C1        | 0.137801 | 12.63172 | 3.864364 | 0.0012437 | 0.0355648 | -0.9076535 |
| GDPD1         | 0.136915 | 10.0911  | 3.638206 | 0.0020324 | 0.0453434 | -1.3727366 |
| SERBP1        | 0.136809 | 10.56853 | 4.047786 | 0.0008356 | 0.0288505 | -0.5300885 |
| CYB5R3        | 0.136582 | 8.697171 | 4.008239 | 0.0009104 | 0.0301166 | -0.6114701 |
| SYF2          | 0.135763 | 9.399612 | 4.671434 | 0.000219  | 0.0137081 | 0.7444567  |
| TSTA3         | 0.135428 | 9.79832  | 3.673085 | 0.0018841 | 0.0435078 | -1.3011087 |
| GSPT1         | 0.134745 | 10.82309 | 3.959454 | 0.0010119 | 3.22E-02  | -0.7118882 |
| TUBA1B        | 0.134351 | 14.65323 | 3.732142 | 0.0016573 | 0.0415436 | -1.1797256 |
| MYCBP2        | 0.134087 | 9.801209 | 3.663878 | 0.0019222 | 4.40E-02  | -1.3200218 |
| 9030607L17RIK | 0.133891 | 8.32339  | 3.59919  | 0.002212  | 0.0473959 | -1.452796  |
| CDS2          | 0.133199 | 7.920417 | 3.625394 | 0.0020897 | 4.59E-02  | -1.3990357 |
| CBFA2T3H      | 0.132913 | 8.344349 | 3.818029 | 0.0013754 | 0.0374075 | -1.0030287 |
| DHR57B        | 0.132653 | 8.680331 | 4.311909 | 0.0004724 | 0.0213636 | 0.0122713  |
| ACTB          | 0.132099 | 12.11403 | 4.403028 | 0.0003884 | 0.018717  | 0.1986563  |
| 0610010K14RIK | 0.131356 | 8.158006 | 3.870976 | 0.001226  | 0.0353389 | -0.8940413 |
| MTX1          | 0.130671 | 9.247128 | 4.094821 | 0.0007548 | 2.76E-02  | -0.4333412 |
| RBBP7         | 0.130079 | 8.381073 | 4.721453 | 0.0001969 | 1.32E-02  | 0.845536   |
| PHF5A         | 0.129925 | 10.43582 | 4.124193 | 0.0007083 | 0.0266828 | -0.3729514 |
| BRD9          | 0.129672 | 10.20812 | 3.6304   | 0.0020671 | 4.57E-02  | -1.3887604 |
| EMD           | 0.129489 | 8.159979 | 4.651248 | 0.0002286 | 1.42E-02  | 0.7036036  |

|               |          |          |          |           |           |            |
|---------------|----------|----------|----------|-----------|-----------|------------|
| FOXK1         | 0.12937  | 7.461842 | 3.84439  | 0.0012989 | 3.63E-02  | -0.9487699 |
| PKIA          | 0.12924  | 12.39856 | 3.702452 | 0.0017677 | 4.24E-02  | -1.2407629 |
| METTL3        | 0.12871  | 9.368955 | 3.762573 | 0.0015513 | 4.02E-02  | -1.1171368 |
| SPINK8        | 0.128279 | 7.749771 | 3.704247 | 0.0017608 | 0.042397  | -1.2370731 |
| FBXL6         | 0.12826  | 8.625924 | 3.885182 | 0.0011888 | 3.46E-02  | -0.8647952 |
| VPS16         | 0.128226 | 9.014455 | 4.139139 | 0.0006858 | 0.0261266 | -0.3422303 |
| KCTD5         | 0.127828 | 7.933331 | 4.523046 | 0.0003004 | 1.62E-02  | 0.4433671  |
| THOC4         | 0.12761  | 9.268186 | 4.011957 | 0.0009031 | 3.00E-02  | -0.6038168 |
| BLVRB         | 0.127497 | 8.8192   | 3.834749 | 0.0013263 | 3.67E-02  | -0.9686156 |
| PCGF1         | 0.127042 | 9.412433 | 4.025675 | 0.0008766 | 2.95E-02  | -0.5755864 |
| RASSF1        | 0.126531 | 8.30912  | 3.636178 | 0.0020413 | 0.0454474 | -1.3768999 |
| PTK2          | 0.126208 | 11.19972 | 4.246995 | 0.0005433 | 2.29E-02  | -0.1207754 |
| 4933403G14RIK | 0.126073 | 7.826789 | 3.93406  | 0.0010692 | 0.0328595 | -0.7641661 |
| WRB           | 0.124858 | 9.794922 | 4.042061 | 0.0008461 | 2.90E-02  | -0.5418695 |
| TMED4         | 0.122656 | 9.128541 | 4.709969 | 0.0002018 | 0.0131817 | 0.822348   |
| UBE2E1        | 0.122032 | 8.225489 | 4.267647 | 0.0005197 | 2.24E-02  | -0.078427  |
| MBD3L2        | 0.121001 | 7.391808 | 3.680664 | 0.0018534 | 0.0431884 | -1.2855374 |
| IL18BP        | 0.119739 | 7.452616 | 3.739589 | 0.0016307 | 0.0411705 | -1.1644107 |
| KAT5          | 0.117979 | 8.077403 | 3.744553 | 0.0016133 | 4.10E-02  | -1.1542025 |
| NARG1L        | 0.117764 | 7.907149 | 3.949565 | 0.0010338 | 0.0322229 | -0.7322453 |
| ZFX           | 0.117032 | 7.98917  | 3.844906 | 0.0012974 | 3.63E-02  | -0.947708  |
| RUVBL1        | 0.116693 | 8.727501 | 4.435915 | 0.000362  | 0.0181667 | 0.2658044  |
| ESAM          | 0.113503 | 8.745956 | 3.77751  | 0.0015018 | 0.0392299 | -1.0864077 |
| GMDS          | 0.112856 | 7.776739 | 3.949    | 0.0010351 | 3.22E-02  | -0.73341   |
| LSM14B        | 0.111337 | 7.492098 | 3.56886  | 0.0023625 | 0.0493104 | -1.5149805 |
| MRPL46        | 0.110875 | 9.525797 | 3.735325 | 0.0016459 | 0.0414383 | -1.1731792 |
| RPS6KA5       | 0.110164 | 7.95178  | 3.772839 | 0.0015171 | 0.0394346 | -1.0960176 |
| SLC35B3       | 0.108427 | 8.700368 | 3.717621 | 0.0017104 | 0.0420782 | -1.2095806 |
| TSC22D2       | 0.107861 | 9.549037 | 3.779019 | 0.0014969 | 0.0392299 | -1.0833029 |
| SLITRK1       | 0.107371 | 7.75003  | 3.920162 | 0.0011019 | 3.32E-02  | -0.7927785 |
| LOC100048384  | 0.10262  | 8.77681  | 3.702962 | 0.0017658 | 4.24E-02  | -1.2397159 |
| LONRF2        | 0.10077  | 7.96813  | 3.630222 | 0.0020679 | 4.57E-02  | -1.3891268 |
| PPT1          | 0.100729 | 8.384394 | 3.708816 | 0.0017434 | 0.0422478 | -1.2276814 |
| GPR27         | 0.09941  | 7.528056 | 3.642811 | 0.0020121 | 0.0449874 | -1.3632827 |
| 5133400G04RIK | 0.098492 | 7.860185 | 3.595705 | 0.0022288 | 0.0474203 | -1.4599443 |
| ZFP295        | 0.097602 | 8.179883 | 3.797281 | 0.0014387 | 0.038148  | -1.0457285 |
| CSNK1D        | 0.090062 | 8.112241 | 3.577346 | 0.0023194 | 0.0487582 | -1.4975874 |
| SNX25         | -0.10074 | 8.230302 | -3.66727 | 0.0019081 | 4.39E-02  | -1.3130609 |
| NDFIP1        | -0.11011 | 12.47241 | -3.67371 | 0.0018815 | 4.35E-02  | -1.2998167 |
| OS9           | -0.11161 | 9.776048 | -3.64767 | 0.001991  | 0.0447271 | -1.3533095 |
| 2810470D21RIK | -0.11326 | 7.521325 | -3.58232 | 0.0022945 | 0.0484061 | -1.487397  |
| POU3F1        | -0.11379 | 9.007956 | -3.57177 | 0.0023476 | 0.0492539 | -1.5090201 |
| PACSIN2       | -0.11422 | 7.673129 | -3.93095 | 0.0010764 | 3.29E-02  | -0.7705723 |

|               |          |          |          |           |           |            |
|---------------|----------|----------|----------|-----------|-----------|------------|
| ZFP161        | -0.11827 | 7.626112 | -3.93071 | 0.001077  | 3.29E-02  | -0.7710695 |
| PTPRD         | -0.11857 | 12.09508 | -3.83201 | 0.0013342 | 0.0366727 | -0.974249  |
| TMEM85        | -0.11889 | 11.62307 | -4.24611 | 0.0005444 | 0.0228879 | -0.1225992 |
| CLP1          | -0.11975 | 7.538941 | -3.74515 | 0.0016112 | 0.0410235 | -1.1529648 |
| HIST1H4H      | -0.12053 | 7.700087 | -3.86318 | 0.0012469 | 0.0355648 | -0.9100871 |
| KIFAP3        | -0.12203 | 11.27705 | -3.98625 | 0.0009548 | 3.09E-02  | -0.6567186 |
| TPRKB         | -0.12374 | 8.811318 | -3.68152 | 0.0018499 | 0.0431884 | -1.2837892 |
| EDNRB         | -0.12397 | 9.175007 | -3.61501 | 0.0021373 | 0.0463651 | -1.4203334 |
| CAPN2         | -0.12446 | 8.271079 | -3.80164 | 0.0014252 | 3.81E-02  | -1.0367638 |
| SNAPC1        | -0.12501 | 7.985758 | -3.5881  | 0.0022659 | 4.80E-02  | -1.4755423 |
| HISPPD1       | -0.12528 | 7.835759 | -4.02386 | 0.0008801 | 0.0294843 | -0.5793265 |
| MTERFD3       | -0.12531 | 7.859384 | -3.72912 | 0.0016682 | 4.16E-02  | -1.1859366 |
| PREP          | -0.1262  | 8.264684 | -4.11758 | 0.0007185 | 2.68E-02  | -0.3865473 |
| TMEM47        | -0.12877 | 7.878606 | -3.60567 | 0.0021811 | 4.70E-02  | -1.4395138 |
| CLCN3         | -0.12886 | 10.12499 | -3.7013  | 0.0017721 | 0.0424069 | -1.2431345 |
| SPINK10       | -0.12902 | 7.611911 | -3.89829 | 0.0011555 | 0.0338716 | -0.8378173 |
| ABHD6         | -0.12902 | 7.722196 | -3.88959 | 0.0011775 | 3.44E-02  | -0.8557137 |
| TMEM209       | -0.12931 | 8.839655 | -3.83074 | 0.0013379 | 0.0366727 | -0.9768611 |
| ATP2B2        | -0.13267 | 9.751188 | -3.97116 | 0.0009866 | 3.17E-02  | -0.6877925 |
| RG9MTD1       | -0.1333  | 8.487556 | -4.14392 | 0.0006787 | 0.0259659 | -0.3324036 |
| NOL14         | -0.13453 | 8.148153 | -3.91433 | 0.001116  | 3.32E-02  | -0.8047906 |
| THY1          | -0.13514 | 13.54559 | -3.70723 | 0.0017495 | 4.22E-02  | -1.2309506 |
| RIC8B         | -0.13621 | 9.071477 | -4.36924 | 0.0004177 | 0.0196763 | 0.1295919  |
| 4930455C21RIK | -0.13652 | 8.093514 | -3.59687 | 0.0022232 | 4.74E-02  | -1.4575509 |
| 5730410I19RIK | -0.13741 | 9.275464 | -4.42989 | 0.0003667 | 1.82E-02  | 0.2535134  |
| AGXT2L1       | -0.1376  | 7.871282 | -3.71662 | 0.0017142 | 4.21E-02  | -1.2116412 |
| LAMP2         | -0.13998 | 9.228855 | -4.46841 | 0.0003376 | 0.0175515 | 0.3320941  |
| ATP13A2       | -0.14187 | 8.678051 | -4.20388 | 0.0005963 | 2.40E-02  | -0.2092578 |
| EIF4G2        | -0.14256 | 7.92252  | -4.124   | 0.0007086 | 0.0266828 | -0.3733403 |
| LOC545013     | -0.14327 | 7.664849 | -4.29334 | 0.0004917 | 0.0218025 | -0.0257699 |
| ST13          | -0.14345 | 7.741379 | -3.6714  | 0.001891  | 0.0435716 | -1.3045615 |
| YLPM1         | -0.14366 | 8.481868 | -3.93811 | 0.0010599 | 0.0328595 | -0.7558345 |
| ZFR           | -0.1442  | 7.367507 | -4.46288 | 0.0003417 | 1.76E-02  | 0.3208083  |
| KLHL5         | -0.14458 | 7.651154 | -3.75628 | 0.0015727 | 0.0403809 | -1.1300774 |
| TRIP12        | -0.14485 | 9.477423 | -3.72606 | 0.0016794 | 0.0417977 | -1.1922231 |
| TCERG1        | -0.14694 | 7.942802 | -3.96305 | 0.0010041 | 0.0321086 | -0.7044908 |
| DERL2         | -0.14696 | 7.459031 | -3.64646 | 0.0019963 | 4.47E-02  | -1.3557899 |
| AMIGO1        | -0.14709 | 8.667317 | -4.05212 | 0.0008278 | 2.89E-02  | -0.5211687 |
| SGTB          | -0.14731 | 10.29943 | -3.57015 | 0.0023559 | 0.0493104 | -1.5123298 |
| 1110008P14RIK | -0.14774 | 12.1151  | -3.93055 | 0.0010774 | 0.0328595 | -0.7713837 |
| UBE3A         | -0.14794 | 7.899536 | -4.73316 | 0.0001921 | 0.0131252 | 0.8691535  |
| UHRF1BP1L     | -0.14896 | 9.539671 | -3.67409 | 0.00188   | 0.0435078 | -1.2990402 |
| LOC216963     | -0.15043 | 8.024407 | -3.63095 | 0.0020646 | 0.0456537 | -1.3876382 |

|               |          |          |          |           |           |            |
|---------------|----------|----------|----------|-----------|-----------|------------|
| STAM2         | -0.15119 | 7.866224 | -3.68604 | 0.0018319 | 0.0430548 | -1.2744961 |
| ACOT11        | -0.15203 | 8.36027  | -4.1899  | 0.0006146 | 0.0242902 | -0.2379526 |
| HIST1H2BN     | -0.15303 | 7.967064 | -4.73609 | 0.0001909 | 0.0131252 | 0.8750789  |
| LMO2          | -0.15336 | 9.382113 | -3.65875 | 0.0019437 | 0.0440806 | -1.3305509 |
| EIF2C2        | -0.15399 | 7.580781 | -4.21038 | 0.000588  | 2.40E-02  | -0.1958997 |
| FIP1L1        | -0.15481 | 7.723884 | -4.92736 | 0.0001275 | 0.0107935 | 1.2591642  |
| NOTCH1        | -0.15571 | 8.00586  | -4.12276 | 0.0007105 | 0.0266828 | -0.3758884 |
| GPC5          | -0.15572 | 8.91444  | -4.70567 | 0.0002036 | 1.32E-02  | 0.8136652  |
| PRPF38A       | -0.15602 | 8.108873 | -4.62013 | 0.0002442 | 1.45E-02  | 0.6405472  |
| 2810405J04RIK | -0.15666 | 9.856258 | -4.07348 | 0.0007904 | 0.0282758 | -0.4772287 |
| TGFB2         | -0.15685 | 7.600033 | -3.62408 | 0.0020956 | 0.0458891 | -1.4017263 |
| 6430548M08RIK | -0.15839 | 10.96646 | -3.68053 | 0.0018539 | 4.32E-02  | -1.2858201 |
| ASH1L         | -0.15929 | 7.909971 | -3.90036 | 0.0011503 | 0.0338716 | -0.8335529 |
| CHFR          | -0.16045 | 9.261868 | -4.51924 | 0.0003028 | 0.0162228 | 0.4356127  |
| SLC39A12      | -0.16046 | 9.773551 | -5.13289 | 8.30E-05  | 0.0090287 | 1.6676177  |
| CAMKK2        | -0.16112 | 9.581449 | -3.85745 | 0.0012625 | 0.0357202 | -0.9218792 |
| RRN3          | -0.16118 | 8.707953 | -3.85942 | 0.0012572 | 0.035664  | -0.9178397 |
| 2410015M20RIK | -0.16215 | 8.777333 | -4.27265 | 0.0005141 | 0.0223267 | -0.0681598 |
| WDR17         | -0.1636  | 8.686966 | -3.65808 | 0.0019465 | 0.0440806 | -1.3319284 |
| 9130422G05RIK | -0.16393 | 8.9559   | -4.34205 | 0.0004428 | 2.05E-02  | 0.0739861  |
| TUBA3B        | -0.16459 | 7.700108 | -4.02529 | 0.0008774 | 2.95E-02  | -0.5763884 |
| IL6ST         | -0.1652  | 7.659632 | -4.06276 | 0.000809  | 0.0284574 | -0.4992828 |
| WNK1          | -0.166   | 8.723069 | -4.09934 | 0.0007474 | 0.0275785 | -0.4240442 |
| GPR17         | -0.16648 | 8.459968 | -4.43055 | 0.0003662 | 1.82E-02  | 0.2548465  |
| FUT8          | -0.16676 | 8.659682 | -5.45916 | 4.24E-05  | 0.0062998 | 2.3056735  |
| UCHL5         | -0.16853 | 9.556969 | -3.77832 | 0.0014992 | 0.0392299 | -1.0847476 |
| LOC433801     | -0.16865 | 7.84273  | -3.83972 | 0.0013121 | 0.0364379 | -0.9583774 |
| SLC40A1       | -0.17149 | 8.859273 | -4.27699 | 0.0005093 | 2.22E-02  | -0.0592762 |
| MAPRE3        | -0.17152 | 8.088653 | -4.3312  | 0.0004532 | 0.0208862 | 0.0517787  |
| OPN3          | -0.17282 | 7.708122 | -4.04011 | 0.0008497 | 2.90E-02  | -0.5458898 |
| CENPB         | -0.17322 | 10.12591 | -3.91946 | 0.0011036 | 0.0331738 | -0.7942286 |
| DEDD2         | -0.17334 | 8.140133 | -4.00613 | 0.0009146 | 3.02E-02  | -0.6158175 |
| NRXN3         | -0.17422 | 10.13802 | -3.94982 | 0.0010333 | 3.22E-02  | -0.7317259 |
| FAM84A        | -0.1746  | 7.918033 | -4.11833 | 0.0007173 | 0.0267929 | -0.385006  |
| TIMP4         | -0.17468 | 8.305034 | -4.95759 | 0.0001197 | 1.08E-02  | 1.3195338  |
| CTSB          | -0.17506 | 13.04462 | -3.56147 | 0.0024007 | 0.0498711 | -1.5301199 |
| TSPYL4        | -0.17512 | 7.585425 | -3.86561 | 0.0012404 | 0.0355648 | -0.9050893 |
| SLCO1C1       | -0.1755  | 9.342314 | -4.25902 | 0.0005294 | 0.0226201 | -0.0961182 |
| NFIC          | -0.17706 | 8.22565  | -4.77678 | 0.0001751 | 0.012746  | 0.9570706  |
| RGS4          | -0.17736 | 12.45033 | -4.09574 | 0.0007533 | 0.0275924 | -0.43144   |
| NARS          | -0.17746 | 10.32798 | -3.62159 | 0.002107  | 0.0458891 | -1.4068518 |
| ENPP2         | -0.17829 | 11.01117 | -3.7567  | 0.0015713 | 0.0403809 | -1.1292176 |
| HR            | -0.17908 | 8.828072 | -4.45946 | 0.0003442 | 1.76E-02  | 0.3138301  |

|               |          |          |          |           |           |            |
|---------------|----------|----------|----------|-----------|-----------|------------|
| SLC30A4       | -0.17947 | 7.703629 | -4.48578 | 0.0003253 | 1.72E-02  | 0.3674846  |
| GNAS          | -0.17948 | 10.05977 | -4.84276 | 0.0001524 | 0.0118285 | 1.0897291  |
| NCAPD2        | -0.18245 | 8.053598 | -4.67424 | 0.0002177 | 1.37E-02  | 0.7501303  |
| LOC329575     | -0.18285 | 9.201205 | -3.75633 | 0.0015725 | 4.04E-02  | -1.1299724 |
| LOC100045780  | -0.18303 | 7.930952 | -4.7066  | 0.0002032 | 0.0131817 | 0.8155534  |
| WDR23         | -0.18308 | 7.938186 | -4.25502 | 0.000534  | 0.0227241 | -0.104325  |
| OSBPL6        | -0.18406 | 9.332504 | -5.1773  | 7.57E-05  | 8.81E-03  | 1.7552247  |
| 2610044O15RIK | -0.18444 | 8.103242 | -4.15411 | 0.000664  | 2.56E-02  | -0.3114715 |
| ALDH6A1       | -0.18479 | 9.784519 | -4.10223 | 0.0007428 | 2.75E-02  | -0.4181125 |
| CASC4         | -0.18573 | 8.509575 | -3.95192 | 0.0010286 | 3.22E-02  | -0.7273919 |
| LOC100046796  | -0.18732 | 8.172219 | -4.60364 | 0.0002529 | 0.0145855 | 0.6071083  |
| TCFE3         | -0.18838 | 7.804171 | -4.06346 | 0.0008078 | 0.0284574 | -0.4978415 |
| PHTF2         | -0.18839 | 8.132256 | -4.86122 | 0.0001465 | 0.0118285 | 1.126759   |
| LRRTM3        | -0.18854 | 8.179193 | -5.48004 | 4.06E-05  | 0.0062998 | 2.3460516  |
| CBLN2         | -0.18928 | 8.078496 | -4.73127 | 0.0001928 | 0.0131252 | 0.8653565  |
| AADAACL1      | -0.18929 | 11.87675 | -3.61261 | 0.0021485 | 0.0464613 | -1.4252732 |
| PDZD8         | -0.18971 | 7.982452 | -4.02129 | 0.000885  | 0.0295547 | -0.5846035 |
| SKIV2L        | -0.18984 | 9.101456 | -4.99182 | 0.0001114 | 1.06E-02  | 1.3877662  |
| PPM1L         | -0.19004 | 10.43274 | -4.31997 | 0.0004643 | 0.0212119 | 0.0287745  |
| CRIP1         | -0.19024 | 8.346967 | -6.30148 | 7.95E-06  | 2.35E-03  | 3.8853216  |
| TXNL4         | -0.1905  | 9.157446 | -3.60158 | 0.0022005 | 0.0472958 | -1.4478879 |
| CYR61         | -0.19129 | 7.222309 | -4.78526 | 0.000172  | 1.27E-02  | 0.974155   |
| PTN           | -0.19226 | 11.83842 | -4.61804 | 0.0002453 | 0.0145194 | 0.6363232  |
| ARCN1         | -0.19386 | 7.924603 | -4.85524 | 0.0001484 | 0.0118285 | 1.1147564  |
| YTHDF1        | -0.19509 | 9.730857 | -3.98897 | 0.0009492 | 0.0308213 | -0.6511362 |
| 1810035L17RIK | -0.19659 | 10.27342 | -4.60511 | 0.0002521 | 0.0145855 | 0.6100953  |
| KLHL7         | -0.19772 | 10.11401 | -6.27652 | 8.35E-06  | 2.35E-03  | 3.8400081  |
| HSP105        | -0.20031 | 11.51016 | -4.7407  | 0.000189  | 1.31E-02  | 0.8843754  |
| TPPP          | -0.20043 | 10.8174  | -3.68649 | 0.00183   | 0.0430548 | -1.2735587 |
| ALKBH8        | -0.20129 | 8.305834 | -3.56189 | 0.0023985 | 0.0498711 | -1.5292702 |
| TOP2B         | -0.20356 | 7.583709 | -4.91279 | 0.0001315 | 0.0109242 | 1.2300363  |
| PRMT8         | -0.20447 | 9.228719 | -4.32778 | 0.0004566 | 0.0209491 | 0.0447725  |
| BCAS2         | -0.20459 | 9.930868 | -3.85349 | 0.0012735 | 0.0358366 | -0.9300381 |
| FGF1          | -0.20547 | 9.163044 | -4.42155 | 0.0003733 | 1.83E-02  | 0.2364772  |
| ABHD3         | -0.20567 | 8.452553 | -3.89907 | 0.0011535 | 3.39E-02  | -0.8362093 |
| ZEB2          | -0.20682 | 9.562137 | -4.40921 | 0.0003833 | 0.0186406 | 0.211284   |
| SEPT9         | -0.20816 | 8.339702 | -4.40372 | 0.0003878 | 0.018717  | 0.200074   |
| ZMAT3         | -0.20863 | 10.58692 | -4.21184 | 0.0005861 | 2.40E-02  | -0.1929023 |
| RASSF3        | -0.21014 | 8.629859 | -3.77624 | 0.001506  | 0.0392414 | -1.0890268 |
| ACSBG1        | -0.21048 | 8.492413 | -6.05039 | 1.30E-05  | 0.0031835 | 3.4252878  |
| MYO6          | -0.21149 | 10.00877 | -5.01405 | 0.0001063 | 0.0103889 | 1.4320228  |
| HIST1H2BC     | -0.21242 | 10.16474 | -3.5685  | 0.0023644 | 0.0493104 | -1.5157184 |
| CCK           | -0.21249 | 12.17367 | -3.68921 | 0.0018193 | 4.30E-02  | -1.2679694 |



|               |          |          |          |           |           |            |
|---------------|----------|----------|----------|-----------|-----------|------------|
| ANK3          | -0.21263 | 8.759347 | -4.02654 | 0.000875  | 0.0294843 | -0.5738069 |
| SYNGR1        | -0.21272 | 9.280637 | -4.56965 | 0.0002719 | 1.53E-02  | 0.538114   |
| TM9SF2        | -0.21281 | 8.777746 | -4.35461 | 0.000431  | 0.0201247 | 0.0996795  |
| PI4KA         | -0.21391 | 10.17242 | -3.82154 | 0.0013649 | 3.72E-02  | -0.9957929 |
| CACYBP        | -0.21484 | 8.237526 | -4.3102  | 0.0004742 | 2.14E-02  | 0.0087758  |
| PAFAH1B1      | -0.2163  | 9.107184 | -4.92709 | 0.0001276 | 0.0107935 | 1.2586269  |
| NECAB1        | -0.21651 | 8.96109  | -3.95495 | 0.0010218 | 0.0322229 | -0.7211596 |
| ID4           | -0.21749 | 8.860939 | -3.69595 | 0.0017929 | 4.27E-02  | -1.254129  |
| SMARCC2       | -0.21829 | 9.053504 | -4.97986 | 0.0001142 | 1.06E-02  | 1.3639485  |
| PTPRA         | -0.22001 | 8.986799 | -3.69976 | 0.0017781 | 0.042453  | -1.2463062 |
| MDH1          | -0.22043 | 8.886961 | -3.79823 | 0.0014358 | 0.038148  | -1.0437762 |
| GPR37L1       | -0.22064 | 9.993285 | -6.26886 | 8.47E-06  | 2.35E-03  | 3.8260906  |
| ZNRF1         | -0.22095 | 8.790423 | -5.15128 | 7.99E-05  | 0.008814  | 1.7039228  |
| PPP2R2C       | -0.22121 | 10.27926 | -3.62116 | 0.002109  | 4.59E-02  | -1.4077325 |
| PPP1R3C       | -0.22135 | 10.51775 | -4.48327 | 0.0003271 | 0.0171612 | 0.3623723  |
| NOL4          | -0.22153 | 9.808341 | -4.19657 | 0.0006058 | 2.42E-02  | -0.2242635 |
| FGF12         | -0.22166 | 9.618374 | -5.05006 | 9.86E-05  | 9.82E-03  | 1.5035791  |
| PTGES3        | -0.22276 | 9.397217 | -5.66861 | 2.77E-05  | 5.32E-03  | 2.7079649  |
| RELL2         | -0.22289 | 10.52928 | -4.00425 | 0.0009183 | 0.0301886 | -0.6196741 |
| ZFP36L1       | -0.22334 | 9.402585 | -4.69833 | 0.0002068 | 0.013307  | 0.7988327  |
| OLIG1         | -0.22351 | 12.08359 | -4.56012 | 0.0002775 | 0.0153781 | 0.5187607  |
| CLCN4-2       | -0.2237  | 8.232154 | -4.6292  | 0.0002395 | 0.014362  | 0.6589501  |
| NR1D2         | -0.22391 | 8.714713 | -4.07918 | 0.0007807 | 0.0280241 | -0.465503  |
| RFWD2         | -0.2247  | 8.863298 | -3.94926 | 0.0010345 | 3.22E-02  | -0.7328782 |
| PTPRB         | -0.2261  | 8.660836 | -4.08625 | 0.0007689 | 0.027788  | -0.4509738 |
| ALDH1A1       | -0.22645 | 7.92979  | -4.94723 | 0.0001223 | 0.0107935 | 1.2988628  |
| PMPCB         | -0.2269  | 8.513254 | -4.34191 | 0.0004429 | 0.0205002 | 0.0736985  |
| HSF2          | -0.22717 | 7.94058  | -3.6506  | 0.0019784 | 4.47E-02  | -1.3472898 |
| HIST1H2BJ     | -0.22728 | 8.773123 | -4.43713 | 0.000361  | 0.0181667 | 0.2682866  |
| 4931406C07RIK | -0.22746 | 8.329672 | -5.39686 | 4.81E-05  | 0.0065977 | 2.1848783  |
| CLSTN1        | -0.22848 | 10.08447 | -5.29847 | 5.89E-05  | 7.49E-03  | 1.9930972  |
| PRKAR1B       | -0.22906 | 10.75021 | -4.39788 | 0.0003927 | 1.88E-02  | 0.1881381  |
| PIK3CA        | -0.22995 | 7.847088 | -4.20432 | 0.0005957 | 2.40E-02  | -0.2083352 |
| SEC11C        | -0.23069 | 9.803964 | -3.73005 | 0.0016649 | 0.0416193 | -1.1840186 |
| GAD1          | -0.23138 | 12.32129 | -4.93249 | 0.0001261 | 0.0107935 | 1.2694124  |
| PTEN          | -0.23151 | 8.296044 | -4.76968 | 0.0001778 | 1.29E-02  | 0.9427776  |
| P2RY12        | -0.23327 | 8.52596  | -5.24954 | 6.52E-05  | 8.00E-03  | 1.8972582  |
| ATAD1         | -0.23347 | 9.886556 | -4.75587 | 0.0001831 | 1.30E-02  | 0.9149489  |
| EVL           | -0.23424 | 10.05722 | -5.19917 | 7.23E-05  | 0.0085762 | 1.7983017  |
| NDRG2         | -0.23447 | 9.481645 | -4.73915 | 0.0001897 | 0.0131252 | 0.8812355  |
| HSD11B1       | -0.2346  | 9.321022 | -5.74456 | 2.38E-05  | 4.78E-03  | 2.8523374  |
| TOMM70A       | -0.2363  | 9.464776 | -3.74169 | 0.0016233 | 0.0411081 | -1.1600816 |
| ARNT2         | -0.23669 | 8.717599 | -3.80193 | 0.0014243 | 0.038148  | -1.0361519 |

|               |          |          |          |           |           |            |
|---------------|----------|----------|----------|-----------|-----------|------------|
| LOC100047935  | -0.23718 | 12.50334 | -3.64889 | 0.0019858 | 0.0447271 | -1.3508061 |
| SNX1          | -0.23848 | 8.491607 | -3.95628 | 0.0010189 | 3.22E-02  | -0.7184235 |
| TBC1D19       | -0.23871 | 8.628206 | -4.54541 | 0.0002864 | 0.0157401 | 0.4888538  |
| RGS10         | -0.23872 | 9.908404 | -5.52722 | 3.69E-05  | 6.08E-03  | 2.4370415  |
| KCTD3         | -0.23901 | 9.957426 | -4.71968 | 0.0001976 | 0.0131817 | 0.8419622  |
| SELK          | -0.23936 | 10.29669 | -4.79476 | 0.0001686 | 1.25E-02  | 0.9932747  |
| SCG3          | -0.23951 | 11.00394 | -4.02795 | 0.0008723 | 2.95E-02  | -0.5709095 |
| D14ERTD171E   | -0.23971 | 11.00192 | -4.56329 | 0.0002756 | 1.54E-02  | 0.5252039  |
| NPY           | -0.23972 | 11.02052 | -6.28426 | 8.22E-06  | 0.002353  | 3.8540794  |
| PMP22         | -0.23996 | 8.672352 | -5.8964  | 1.76E-05  | 4.12E-03  | 3.138509   |
| PPP2R2B       | -0.23996 | 9.408388 | -3.71488 | 0.0017206 | 0.0420782 | -1.215218  |
| TESK1         | -0.24003 | 9.737184 | -4.60787 | 0.0002507 | 1.46E-02  | 0.6156928  |
| SEPP1         | -0.24341 | 8.726684 | -5.15626 | 7.91E-05  | 0.008814  | 1.7137436  |
| KIRREL3       | -0.24347 | 8.251422 | -4.81584 | 0.0001613 | 0.0121551 | 1.0356649  |
| GLRX2         | -0.25017 | 8.893965 | -4.87034 | 0.0001437 | 1.18E-02  | 1.145037   |
| NLGN1         | -0.25036 | 8.141828 | -4.2005  | 0.0006007 | 0.0241015 | -0.2161772 |
| PHF14         | -0.25092 | 7.979481 | -5.59778 | 3.20E-05  | 5.77E-03  | 2.5725855  |
| GSTM5         | -0.25106 | 11.46692 | -4.13677 | 0.0006893 | 0.0261664 | -0.3471033 |
| LOC100044468  | -0.2512  | 11.05575 | -4.26011 | 0.0005282 | 0.0226201 | -0.0938708 |
| RWDD4A        | -0.25139 | 8.637847 | -4.85142 | 0.0001496 | 0.0118285 | 1.10711    |
| LOC100047794  | -0.25142 | 9.243414 | -3.85526 | 0.0012686 | 0.0357945 | -0.9263898 |
| TJP1          | -0.25191 | 8.397151 | -4.0019  | 0.000923  | 0.0302488 | -0.6245195 |
| ITGB5         | -0.25239 | 8.32545  | -6.29233 | 8.10E-06  | 0.002353  | 3.8687185  |
| AK1           | -0.25505 | 9.469627 | -3.58456 | 0.0022834 | 0.0482896 | -1.4828039 |
| RORA          | -0.26033 | 8.983488 | -5.44226 | 4.39E-05  | 0.0063204 | 2.2729668  |
| MDH2          | -0.26061 | 10.05894 | -4.60578 | 0.0002518 | 1.46E-02  | 0.6114502  |
| NDUFB2        | -0.26183 | 8.82696  | -4.05168 | 0.0008286 | 0.0288505 | -0.5220875 |
| TYKI          | -0.26287 | 8.792128 | -6.66794 | 3.96E-06  | 1.99E-03  | 4.5393793  |
| CCNG2         | -0.26317 | 9.25757  | -5.02891 | 0.0001031 | 0.0101654 | 1.4615605  |
| RAD23B        | -0.26343 | 10.35507 | -5.17238 | 7.65E-05  | 0.008814  | 1.745544   |
| LOC100041703  | -0.26508 | 7.832738 | -4.28251 | 0.0005033 | 0.022131  | -0.0479632 |
| RHBDL2        | -0.26528 | 10.20887 | -4.02472 | 0.0008784 | 0.0294843 | -0.5775547 |
| IDH2          | -0.26607 | 9.18773  | -3.87099 | 0.001226  | 3.53E-02  | -0.8940052 |
| ALDOA         | -0.2674  | 12.53948 | -5.77088 | 2.26E-05  | 0.0046716 | 2.9021697  |
| DYNLT3        | -0.26858 | 11.61523 | -5.4194  | 4.60E-05  | 6.38E-03  | 2.2286402  |
| A530082C11RIK | -0.27033 | 8.569516 | -5.29941 | 5.88E-05  | 0.0074912 | 1.9949395  |
| VCL           | -0.27214 | 9.080144 | -4.52691 | 0.0002979 | 1.62E-02  | 0.4512231  |
| ADAM9         | -0.27539 | 8.772647 | -6.07587 | 1.23E-05  | 3.10E-03  | 3.4724016  |
| GPM6B         | -0.27571 | 8.30149  | -4.57623 | 0.0002681 | 0.0152134 | 0.5514867  |
| LOC100044177  | -0.27742 | 8.509613 | -6.58919 | 4.59E-06  | 0.0020618 | 4.4005792  |
| SNAP91        | -0.28482 | 8.62884  | -3.87655 | 0.0012113 | 3.51E-02  | -0.8825673 |
| ACTR3         | -0.28506 | 11.12468 | -3.93403 | 0.0010693 | 3.29E-02  | -0.7642283 |
| SMPD4         | -0.28575 | 8.127185 | -3.64671 | 0.0019952 | 0.0447271 | -1.3552777 |

|               |          |          |          |           |           |            |
|---------------|----------|----------|----------|-----------|-----------|------------|
| SCN1A         | -0.28904 | 10.25208 | -5.26079 | 6.37E-05  | 0.0079058 | 1.9193187  |
| UBE2J1        | -0.29177 | 8.766111 | -5.52885 | 3.68E-05  | 6.08E-03  | 2.4401853  |
| DST           | -0.29372 | 9.687143 | -3.75176 | 0.0015882 | 4.07E-02  | -1.1393895 |
| C1QL3         | -0.29422 | 8.877394 | -5.78193 | 2.21E-05  | 4.67E-03  | 2.9230802  |
| KPNB1         | -0.29714 | 10.22433 | -4.6702  | 0.0002195 | 0.0137081 | 0.7419639  |
| SLC7A10       | -0.29735 | 8.636367 | -8.23012 | 2.47E-07  | 3.80E-04  | 7.092891   |
| 6330577E15RIK | -0.29796 | 8.563992 | -4.35598 | 0.0004297 | 2.01E-02  | 0.1024866  |
| GPM6A         | -0.29976 | 10.32941 | -6.67068 | 3.94E-06  | 0.0019885 | 4.5441809  |
| STMN1         | -0.30016 | 10.84226 | -3.68246 | 0.0018461 | 0.0431884 | -1.2818468 |
| KCNK2         | -0.3005  | 8.964489 | -5.35921 | 5.20E-05  | 7.04E-03  | 2.1116404  |
| SEL1L         | -0.30286 | 8.589124 | -5.56193 | 3.44E-05  | 6.04E-03  | 2.5038057  |
| PLA2G7        | -0.30305 | 8.286953 | -3.78405 | 0.0014807 | 0.0389665 | -1.0729616 |
| GLRX3         | -0.30559 | 9.166401 | -4.64004 | 0.0002341 | 0.0142703 | 0.6809137  |
| ID2           | -0.31113 | 9.266153 | -3.6735  | 0.0018824 | 0.0435078 | -1.3002596 |
| S100B         | -0.31587 | 7.766454 | -7.19091 | 1.51E-06  | 1.14E-03  | 5.436483   |
| SEPT7         | -0.31839 | 8.206913 | -5.2808  | 6.11E-05  | 7.68E-03  | 1.9585222  |
| AI314180      | -0.31899 | 9.368344 | -4.71678 | 0.0001989 | 1.32E-02  | 0.8361058  |
| SLC12A5       | -0.31938 | 8.211898 | -4.77945 | 0.0001741 | 1.27E-02  | 0.9624529  |
| IAP           | -0.32293 | 11.19885 | -6.45788 | 5.89E-06  | 2.22E-03  | 4.1670076  |
| TRIM37        | -0.32304 | 11.01737 | -3.83119 | 0.0013366 | 3.67E-02  | -0.9759428 |
| GLUL          | -0.32372 | 8.428036 | -4.71155 | 0.0002011 | 1.32E-02  | 0.8255373  |
| NDRG4         | -0.33294 | 12.05689 | -3.83081 | 0.0013377 | 3.67E-02  | -0.9767267 |
| FAM134A       | -0.33294 | 10.51222 | -6.48357 | 5.61E-06  | 2.22E-03  | 4.2129138  |
| MEGF9         | -0.33433 | 9.484822 | -4.04453 | 0.0008415 | 2.89E-02  | -0.5367853 |
| A030009H04RIK | -0.33485 | 9.0145   | -3.99737 | 0.0009321 | 3.04E-02  | -0.633838  |
| ABCC10        | -0.34543 | 7.645496 | -5.23083 | 6.77E-05  | 8.12E-03  | 1.8605362  |
| PGRMC1        | -0.34944 | 10.40578 | -3.66107 | 0.0019339 | 4.41E-02  | -1.3257865 |
| FOS           | -0.35902 | 9.766477 | -5.655   | 2.85E-05  | 5.37E-03  | 2.6820011  |
| MAP1LC3B      | -0.36605 | 9.973792 | -3.80467 | 0.0014158 | 3.81E-02  | -1.0305294 |
| LOC100048530  | -0.37395 | 8.460216 | -6.95259 | 2.33E-06  | 1.54E-03  | 5.0329778  |
| NPAS4         | -0.37975 | 8.183955 | -9.78878 | 2.11E-08  | 1.11E-04  | 9.2791836  |
| SETD3         | -0.39251 | 9.387763 | -3.68848 | 0.0018222 | 4.30E-02  | -1.2694829 |
| MAP2K1        | -0.40863 | 9.565388 | -6.11314 | 1.15E-05  | 2.95E-03  | 3.5411557  |
| LPGAT1        | -0.42389 | 8.435119 | -4.84656 | 0.0001511 | 1.18E-02  | 1.0973414  |
| HUWE1         | -0.42614 | 9.578061 | -5.64392 | 2.91E-05  | 0.0053943 | 2.6608438  |
| XLR4A         | -0.43142 | 8.818481 | -8.95086 | 7.64E-08  | 1.61E-04  | 8.1463969  |
| PTGDS         | -0.43295 | 9.929905 | -5.5326  | 3.65E-05  | 6.08E-03  | 2.4474026  |
| JAK1          | -0.44352 | 8.622206 | -6.86547 | 2.74E-06  | 1.70E-03  | 4.883258   |
| DUSP1         | -0.46451 | 10.59118 | -6.61164 | 4.40E-06  | 2.06E-03  | 4.4402496  |
| SPARCL1       | -0.46679 | 10.72649 | -5.15217 | 7.97E-05  | 0.008814  | 1.7056765  |
| ARC           | -0.49701 | 10.64455 | -7.30596 | 1.23E-06  | 9.95E-04  | 5.6280925  |

## DEGs in resilient mPFC

adj.P.Value < 0.05

DEGup 204

DEGdown 214

| Gene      | logFC    | AveExpr  | t        | P.Value  | adj.P.Val | B        |
|-----------|----------|----------|----------|----------|-----------|----------|
| CTGF      | 0.754879 | 10.55685 | 3.879257 | 0.001204 | 0.037829  | -0.87661 |
| HBA-A1    | 0.664221 | 12.60395 | 7.678997 | 6.33E-07 | 5.57E-04  | 6.23465  |
| GBP2      | 0.588043 | 7.660565 | 9.766155 | 2.18E-08 | 1.15E-04  | 9.248671 |
| SLA       | 0.573119 | 8.890923 | 5.172347 | 7.65E-05 | 8.77E-03  | 1.74561  |
| COL6A1    | 0.464607 | 9.225453 | 5.598795 | 3.19E-05 | 5.52E-03  | 2.574572 |
| RGS9      | 0.435953 | 8.980841 | 5.266522 | 6.29E-05 | 0.007938  | 1.930668 |
| HBB-B1    | 0.383116 | 8.799639 | 3.873705 | 0.001219 | 3.78E-02  | -0.88804 |
| AHI1      | 0.379121 | 10.57708 | 8.426566 | 1.78E-07 | 2.09E-04  | 7.386834 |
| IGTP      | 0.36929  | 7.656577 | 9.389765 | 3.86E-08 | 1.28E-04  | 8.75E+00 |
| RAI14     | 0.367945 | 8.747604 | 4.236513 | 0.000556 | 0.025171  | -0.14195 |
| SEZ6      | 0.354107 | 9.334715 | 5.138415 | 8.20E-05 | 9.03E-03  | 1.678669 |
| IIGP2     | 0.353915 | 7.653213 | 8.983659 | 7.26E-08 | 0.000128  | 8.191642 |
| GRP       | 0.350456 | 8.925961 | 5.29567  | 5.93E-05 | 0.007721  | 1.987725 |
| NTSR1     | 0.343662 | 8.087294 | 4.8241   | 0.000158 | 1.23E-02  | 1.052461 |
| DPYSL5    | 0.342583 | 7.951066 | 8.204122 | 2.58E-07 | 2.72E-04  | 7.052798 |
| IFITM3    | 0.335355 | 8.690011 | 5.007851 | 0.000108 | 1.03E-02  | 1.419851 |
| LOC10004  | 0.32722  | 9.874884 | 4.522108 | 0.000301 | 1.71E-02  | 0.441727 |
| CDH13     | 0.314059 | 8.439697 | 9.044727 | 6.59E-08 | 1.28E-04  | 8.277166 |
| SAMD14    | 0.309946 | 9.194004 | 6.79189  | 3.14E-06 | 0.001743  | 4.755613 |
| CRYM      | 0.309089 | 11.54698 | 4.70963  | 0.000202 | 0.014204  | 0.821896 |
| COL5A1    | 0.307215 | 8.052943 | 7.008434 | 2.10E-06 | 1.31E-03  | 5.128011 |
| ASAH3L    | 0.306114 | 7.969307 | 6.409574 | 6.46E-06 | 2.53E-03  | 4.080242 |
| ENSMUSG   | 0.297461 | 7.882982 | 5.005886 | 0.000108 | 1.03E-02  | 1.415943 |
| PTPRU     | 0.295064 | 8.320852 | 4.616639 | 0.000246 | 0.015119  | 0.633731 |
| FEZF2     | 0.285482 | 9.724721 | 5.556439 | 3.48E-05 | 5.73E-03  | 2.493307 |
| BCL11B    | 0.283545 | 10.63047 | 3.690625 | 0.001814 | 4.79E-02  | -1.26465 |
| NRBP2     | 0.282766 | 10.27506 | 6.022231 | 1.37E-05 | 3.62E-03  | 3.373052 |
| RASL10A   | 0.282602 | 9.588202 | 6.251112 | 8.77E-06 | 2.93E-03  | 3.793685 |
| LY6A      | 0.27838  | 9.565472 | 5.842394 | 1.96E-05 | 4.56E-03  | 3.037082 |
| COTL1     | 0.276797 | 9.645081 | 5.122318 | 8.48E-05 | 9.13E-03  | 1.646866 |
| DRD1A     | 0.276574 | 8.898292 | 3.759078 | 0.001563 | 4.40E-02  | -1.12392 |
| KLF5      | 0.274188 | 8.790538 | 5.392917 | 4.85E-05 | 0.006921  | 2.177307 |
| FDPS      | 0.272956 | 10.83188 | 4.847234 | 0.000151 | 0.011868  | 1.098906 |
| SMAD3     | 0.269576 | 8.05612  | 5.125047 | 8.44E-05 | 0.009132  | 1.652259 |
| FXYP6     | 0.268861 | 12.80224 | 4.950833 | 0.000121 | 0.010676  | 1.30623  |
| D12ERTD6  | 0.26779  | 9.969361 | 4.113313 | 0.000725 | 0.029809  | -0.39497 |
| HIST1H2AI | 0.267699 | 7.875641 | 8.649114 | 1.24E-07 | 0.000163  | 7.713722 |

|           |          |          |          |          |          |          |
|-----------|----------|----------|----------|----------|----------|----------|
| PADI6     | 0.263685 | 7.451042 | 4.302671 | 0.000482 | 2.29E-02 | -0.00634 |
| SYT5      | 0.263654 | 10.3186  | 5.802692 | 2.12E-05 | 4.59E-03 | 2.962275 |
| RAMP3     | 0.26293  | 8.392446 | 5.211627 | 7.05E-05 | 8.27E-03 | 1.822927 |
| DDAH1     | 0.256774 | 11.28131 | 3.71937  | 0.001704 | 0.04656  | -1.20557 |
| STXBP2    | 0.2564   | 9.009519 | 3.935616 | 0.001066 | 0.035927 | -0.76058 |
| DDR1      | 0.256168 | 8.746017 | 5.444596 | 4.37E-05 | 6.49E-03 | 2.277557 |
| SGK1      | 0.254614 | 11.44792 | 6.124988 | 1.12E-05 | 0.003379 | 3.562872 |
| HIST1H2AI | 0.253116 | 8.040344 | 4.566683 | 0.000274 | 0.016134 | 0.532349 |
| HIST1H2AC | 0.249375 | 10.24161 | 4.301683 | 0.000483 | 0.022855 | -0.00836 |
| PLOD3     | 0.249374 | 9.058599 | 5.104438 | 8.80E-05 | 0.009141 | 1.611504 |
| DGKG      | 0.24878  | 10.63397 | 5.83452  | 1.99E-05 | 0.004561 | 3.022265 |
| PDE1B     | 0.245786 | 10.87632 | 5.661972 | 2.81E-05 | 0.004978 | 2.695324 |
| WSCD1     | 0.245043 | 8.908179 | 4.635572 | 0.000236 | 0.015113 | 0.672099 |
| KLF16     | 0.240713 | 8.781993 | 4.227722 | 0.000566 | 2.55E-02 | -0.15999 |
| TFG       | 0.238861 | 9.941635 | 3.806442 | 0.00141  | 0.04123  | -1.02648 |
| SCAMP2    | 0.237762 | 8.778437 | 5.137632 | 8.22E-05 | 9.03E-03 | 1.677123 |
| SLC9A3R2  | 0.237439 | 8.865386 | 5.117592 | 8.57E-05 | 0.009132 | 1.637523 |
| DBI       | 0.234461 | 11.25175 | 5.100167 | 8.88E-05 | 0.009141 | 1.603052 |
| PRMT2     | 0.234318 | 11.1476  | 5.195364 | 7.29E-05 | 8.45E-03 | 1.790938 |
| ZER1      | 0.233769 | 12.35393 | 4.966356 | 0.000117 | 0.010676 | 1.337197 |
| AGPAT4    | 0.232422 | 9.419419 | 3.653838 | 0.001965 | 0.049597 | -1.34022 |
| JOSD2     | 0.232159 | 9.284611 | 4.643253 | 0.000232 | 0.015028 | 0.687658 |
| RPS26     | 0.232126 | 11.85228 | 4.4118   | 0.000381 | 0.020113 | 0.216864 |
| XRCC1     | 0.23129  | 8.464533 | 5.731443 | 2.44E-05 | 4.86E-03 | 2.827463 |
| KCTD10    | 0.23088  | 9.086462 | 4.894912 | 0.000137 | 0.011343 | 1.194456 |
| 1700027N  | 0.229076 | 8.011994 | 5.683394 | 2.69E-05 | 0.004956 | 2.736143 |
| CASC3     | 0.228791 | 10.04453 | 3.914493 | 0.001116 | 3.66E-02 | -0.80407 |
| LMAN2L    | 0.22869  | 9.210995 | 5.523274 | 3.72E-05 | 5.95E-03 | 2.429505 |
| LOC10004  | 0.227385 | 7.312192 | 6.805442 | 3.06E-06 | 1.74E-03 | 4.779134 |
| SETD1B    | 0.226028 | 10.51562 | 3.749723 | 0.001595 | 0.044654 | -1.14316 |
| ARPC5     | 0.224685 | 11.12969 | 5.24693  | 6.55E-05 | 8.00E-03 | 1.892259 |
| SPRED1    | 0.223292 | 11.63264 | 5.717807 | 2.51E-05 | 0.004907 | 2.801582 |
| DRCTNNB   | 0.223107 | 8.362208 | 5.79994  | 2.13E-05 | 4.59E-03 | 2.957083 |
| METTL3    | 0.223015 | 9.368955 | 5.951378 | 1.58E-05 | 0.004058 | 3.241251 |
| MED6      | 0.222456 | 8.938034 | 6.472913 | 5.73E-06 | 2.42E-03 | 4.193701 |
| DNAJB2    | 0.221406 | 9.228935 | 4.12038  | 0.000714 | 0.029809 | -0.38044 |
| MMP24     | 0.219163 | 9.045771 | 5.410081 | 4.69E-05 | 0.006773 | 2.210642 |
| PRR7      | 0.217806 | 9.384036 | 5.687593 | 2.67E-05 | 0.004956 | 2.744136 |
| FAM171A2  | 0.216884 | 10.38884 | 3.946216 | 0.001041 | 0.035683 | -0.73877 |
| HMG2      | 0.215461 | 11.39921 | 3.670704 | 0.001894 | 0.04851  | -1.30558 |
| CCDC3     | 0.21541  | 9.109321 | 4.425504 | 0.00037  | 0.019728 | 0.244844 |
| TRA2A     | 0.214269 | 10.53561 | 3.734398 | 0.001649 | 0.045561 | -1.17468 |
| FIGF      | 0.214219 | 7.855367 | 6.194621 | 9.79E-06 | 3.04E-03 | 3.690601 |

|           |          |          |          |          |          |          |
|-----------|----------|----------|----------|----------|----------|----------|
| LOC10004i | 0.211929 | 11.75657 | 3.798446 | 0.001435 | 4.17E-02 | -1.04293 |
| GBP3      | 0.211678 | 7.725706 | 6.604028 | 4.46E-06 | 2.01E-03 | 4.426593 |
| AMIGO2    | 0.211462 | 8.551371 | 4.045602 | 0.00084  | 0.032337 | -0.53422 |
| LASS5     | 0.209702 | 9.452111 | 5.141274 | 8.16E-05 | 0.009033 | 1.684314 |
| CXX1C     | 0.209459 | 10.42897 | 4.648798 | 0.00023  | 0.015028 | 0.698886 |
| LOC10004i | 0.208053 | 9.222131 | 3.912703 | 0.00112  | 0.03659  | -0.80775 |
| RFX1      | 0.207857 | 8.273137 | 4.865507 | 0.000145 | 0.01161  | 1.135554 |
| FAM116B   | 0.20712  | 9.604264 | 4.729358 | 0.000194 | 0.013854 | 0.861718 |
| RASAL1    | 0.206882 | 8.861191 | 4.023144 | 0.000881 | 3.33E-02 | -0.58043 |
| DLG4      | 0.205699 | 9.496925 | 4.11167  | 0.000728 | 0.029809 | -0.39835 |
| CBLN1     | 0.204016 | 8.541473 | 3.823809 | 0.001358 | 0.040262 | -0.99074 |
| SRP54     | 0.203745 | 8.205825 | 4.376794 | 0.000411 | 0.020949 | 0.14534  |
| 2610208M  | 0.203239 | 9.261427 | 4.049511 | 0.000833 | 0.032232 | -0.52618 |
| ERP29     | 0.201123 | 11.32563 | 3.854424 | 0.001271 | 3.88E-02 | -0.92772 |
| HSF1      | 0.199304 | 9.898833 | 4.916512 | 0.00013  | 0.010934 | 1.237669 |
| HNRNPK    | 0.197537 | 8.520658 | 4.418271 | 0.000376 | 0.019935 | 0.230077 |
| DENND2A   | 0.197443 | 8.295975 | 4.348777 | 0.000436 | 0.021322 | 0.088044 |
| 1500011H; | 0.197184 | 10.14294 | 3.724352 | 0.001686 | 0.046323 | -1.19533 |
| KLF13     | 0.196669 | 10.30388 | 3.935873 | 0.001065 | 0.035927 | -0.76006 |
| HPCAL4    | 0.195933 | 13.09549 | 5.677306 | 2.72E-05 | 4.96E-03 | 2.724548 |
| PACRG     | 0.194773 | 9.414803 | 4.844402 | 0.000152 | 0.011868 | 1.093223 |
| GPN3      | 0.194117 | 8.406506 | 4.061117 | 0.000812 | 3.16E-02 | -0.50231 |
| SEMA4A    | 0.193774 | 10.29253 | 3.874244 | 0.001217 | 3.78E-02 | -0.88693 |
| DCLK2     | 0.191712 | 9.040562 | 3.718352 | 0.001708 | 0.04656  | -1.20766 |
| MID1      | 0.190901 | 7.855269 | 3.87565  | 0.001214 | 3.78E-02 | -0.88403 |
| C4B       | 0.190897 | 7.499789 | 4.950745 | 0.000121 | 0.010676 | 1.306054 |
| RPS4Y2    | 0.188862 | 7.95517  | 4.246524 | 0.000544 | 0.02474  | -0.12142 |
| LOC10004i | 0.188612 | 11.82016 | 3.957154 | 0.001017 | 0.035303 | -0.71625 |
| PYCR2     | 0.188531 | 9.024379 | 4.6808   | 0.000215 | 1.47E-02 | 0.763638 |
| RCL1      | 0.187833 | 8.423886 | 4.981527 | 0.000114 | 0.010444 | 1.367438 |
| ZFHX2     | 0.187236 | 10.14144 | 4.129729 | 0.0007   | 0.029539 | -0.36123 |
| HIST1H2AI | 0.18693  | 7.994154 | 4.483322 | 0.000327 | 0.018068 | 0.362757 |
| LSM3      | 0.186498 | 9.234061 | 4.127948 | 0.000703 | 0.029539 | -0.36489 |
| HRMT1L2   | 0.185616 | 10.48449 | 4.494736 | 0.000319 | 0.017777 | 0.386008 |
| THSD4     | 0.183608 | 7.619463 | 4.882537 | 0.00014  | 0.011502 | 1.169679 |
| LZTS2     | 0.183385 | 9.066074 | 3.659976 | 0.001939 | 0.049086 | -1.32761 |
| PSMB3     | 0.182978 | 11.29022 | 3.66235  | 0.001929 | 4.90E-02 | -1.32274 |
| EIF3D     | 0.182803 | 10.47309 | 4.010082 | 0.000907 | 0.033693 | -0.60731 |
| MAP3K3    | 0.18226  | 8.555405 | 3.662736 | 0.001927 | 0.049041 | -1.32194 |
| H3F3A     | 0.182258 | 10.16718 | 4.355855 | 0.00043  | 0.021197 | 0.102522 |
| 4931406P1 | 0.181975 | 9.157323 | 3.94658  | 0.001041 | 3.57E-02 | -0.73801 |
| STYX      | 0.181766 | 9.168237 | 4.186619 | 0.000619 | 0.026665 | -0.24436 |
| GSPT1     | 0.18176  | 10.82309 | 4.875625 | 0.000142 | 0.011502 | 1.155831 |

|           |          |          |          |          |          |          |
|-----------|----------|----------|----------|----------|----------|----------|
| D430041B  | 0.179947 | 9.123235 | 4.528459 | 0.000297 | 0.017077 | 0.454649 |
| IFITM2    | 0.179023 | 7.779981 | 4.270236 | 0.000517 | 0.02392  | -0.0728  |
| UHRF2     | 0.178978 | 9.131067 | 4.684725 | 0.000213 | 0.014736 | 0.771575 |
| MUM1      | 0.178381 | 9.767936 | 5.250449 | 6.51E-05 | 0.008005 | 1.899161 |
| SETD1A    | 0.176067 | 8.685101 | 4.409208 | 0.000383 | 0.020125 | 0.211571 |
| DDIT4     | 0.176011 | 8.683473 | 3.878703 | 0.001206 | 0.037829 | -0.87775 |
| TPR       | 0.175645 | 9.902227 | 3.665913 | 0.001914 | 0.048899 | -1.31542 |
| LOR       | 0.175076 | 9.268759 | 3.98071  | 0.000966 | 0.034588 | -0.66776 |
| RUNX1T1   | 0.174816 | 9.781986 | 3.840155 | 0.001311 | 3.96E-02 | -0.95709 |
| DMAP1     | 0.174714 | 8.756281 | 4.073384 | 0.000791 | 0.031015 | -0.47708 |
| 2700094K1 | 0.174249 | 10.63579 | 4.117596 | 0.000718 | 0.029809 | -0.38617 |
| BEX4      | 0.174243 | 9.108064 | 4.048791 | 0.000834 | 3.22E-02 | -0.52766 |
| P140      | 0.173812 | 8.305353 | 4.392659 | 0.000397 | 0.020647 | 0.177764 |
| RPS27A    | 0.173153 | 9.831559 | 4.671271 | 0.000219 | 0.014817 | 0.744368 |
| GNB4      | 0.172854 | 7.85434  | 4.605403 | 0.000252 | 0.015371 | 0.610945 |
| ST6GALNA  | 0.172481 | 9.782116 | 3.901703 | 0.001147 | 3.69E-02 | -0.8304  |
| SYVN1     | 0.171971 | 10.57354 | 4.469361 | 0.000337 | 0.018519 | 0.334304 |
| CTNNA1    | 0.17191  | 8.952682 | 4.813432 | 0.000162 | 0.012485 | 1.031028 |
| MED30     | 0.171862 | 10.05659 | 3.94194  | 0.001051 | 0.035781 | -0.74757 |
| ZFP672    | 0.171264 | 9.711252 | 4.034234 | 0.000861 | 0.033022 | -0.55761 |
| ARHGEF15  | 0.171221 | 8.08675  | 4.632276 | 0.000238 | 0.015119 | 0.665423 |
| CALN1     | 0.170225 | 12.02832 | 3.677461 | 0.001866 | 0.048272 | -1.2917  |
| D16ERTD4  | 0.170173 | 8.663599 | 4.803787 | 0.000165 | 0.012649 | 1.011638 |
| MAS1      | 0.169246 | 8.797854 | 3.908857 | 0.001129 | 0.036669 | -0.81567 |
| TPST1     | 0.168802 | 9.578391 | 3.708994 | 0.001743 | 0.046798 | -1.2269  |
| THOC4     | 0.167052 | 9.268186 | 4.794388 | 0.000169 | 0.012719 | 0.992735 |
| ACVR2B    | 0.163689 | 8.799062 | 4.752311 | 0.000184 | 0.013804 | 0.908006 |
| RPS4X     | 0.163195 | 12.70981 | 3.734893 | 0.001647 | 0.045561 | -1.17366 |
| ST5       | 0.162886 | 8.930812 | 5.298388 | 5.89E-05 | 7.72E-03 | 1.99304  |
| IFIT3     | 0.161767 | 7.826133 | 4.523045 | 0.0003   | 0.017077 | 0.443635 |
| EXTL1     | 0.160807 | 8.809089 | 3.937899 | 0.00106  | 0.035927 | -0.75589 |
| RAB9B     | 0.159126 | 9.805159 | 4.439213 | 0.000359 | 0.019356 | 0.272822 |
| IPPK      | 0.159102 | 8.711257 | 3.994015 | 0.000939 | 0.034092 | -0.64038 |
| TATDN2    | 0.158895 | 8.410132 | 3.916323 | 0.001111 | 3.66E-02 | -0.8003  |
| NUMA1     | 0.158411 | 7.735714 | 4.378718 | 0.000409 | 0.020949 | 0.149273 |
| RBBP7     | 0.15825  | 8.381073 | 5.243497 | 6.60E-05 | 0.008005 | 1.885522 |
| ATG16L1   | 0.157489 | 10.13511 | 3.993415 | 0.00094  | 0.034092 | -0.64161 |
| TSPAN33   | 0.155817 | 8.140744 | 3.930612 | 0.001077 | 0.036089 | -0.77089 |
| ETS2      | 0.155493 | 10.83293 | 3.952496 | 0.001027 | 0.035544 | -0.72584 |
| ALOXE3    | 0.154447 | 7.650103 | 4.255955 | 0.000533 | 2.45E-02 | -0.10208 |
| PSME2     | 0.154104 | 7.759331 | 3.659718 | 0.00194  | 4.91E-02 | -1.32814 |
| GSTP1     | 0.153725 | 10.36609 | 4.176425 | 0.000633 | 0.027142 | -0.26529 |
| ING4      | 0.152826 | 8.670024 | 3.795931 | 0.001443 | 0.041834 | -1.04811 |

|           |          |          |          |          |          |          |
|-----------|----------|----------|----------|----------|----------|----------|
| TPPP3     | 0.152722 | 7.8509   | 4.101369 | 0.000744 | 0.029973 | -0.41953 |
| PRDM4     | 0.151217 | 9.504693 | 4.574073 | 0.000269 | 0.016061 | 0.54736  |
| IRF1      | 0.150983 | 7.651147 | 4.274084 | 0.000513 | 0.023827 | -0.06491 |
| PHF5A     | 0.150902 | 10.43582 | 4.372688 | 0.000415 | 2.10E-02 | 0.136946 |
| RGS12     | 0.150282 | 8.360341 | 3.911268 | 0.001123 | 3.66E-02 | -0.81071 |
| COG1      | 0.149892 | 8.320809 | 4.087157 | 0.000767 | 0.030559 | -0.44875 |
| CACNG5    | 0.149089 | 7.778077 | 4.58217  | 0.000265 | 0.015965 | 0.563801 |
| MAPK1     | 0.148079 | 11.3214  | 3.865642 | 0.00124  | 0.038154 | -0.90463 |
| GBL       | 0.147824 | 9.860339 | 3.683022 | 0.001844 | 4.79E-02 | -1.28027 |
| ZC3H3     | 0.147549 | 8.206165 | 3.880082 | 0.001202 | 0.037829 | -0.87491 |
| VPS25     | 0.146994 | 8.981466 | 4.329761 | 0.000455 | 0.021908 | 0.04913  |
| MOXD1     | 0.146    | 7.645678 | 3.998847 | 0.000929 | 0.034092 | -0.63043 |
| NEGR1     | 0.144958 | 8.151532 | 3.753037 | 0.001584 | 0.044452 | -1.13634 |
| RFC5      | 0.143688 | 7.758241 | 4.497066 | 0.000318 | 0.017777 | 0.390752 |
| B230373PC | 0.143326 | 8.126521 | 4.000389 | 0.000926 | 0.034092 | -0.62726 |
| DHRS7B    | 0.142058 | 8.680331 | 4.215287 | 0.000582 | 0.025906 | -0.18551 |
| USE1      | 0.139822 | 10.1733  | 3.704687 | 0.001759 | 0.047118 | -1.23575 |
| SLC2A3    | 0.139046 | 11.33237 | 4.356945 | 0.000429 | 0.021197 | 0.104753 |
| ZFX       | 0.13799  | 7.98917  | 4.138426 | 0.000687 | 0.029109 | -0.34336 |
| ANKS3     | 0.135533 | 8.460922 | 3.729339 | 0.001667 | 4.59E-02 | -1.18508 |
| 2400006N  | 0.134595 | 7.582371 | 3.713344 | 0.001726 | 4.66E-02 | -1.21796 |
| EG633640  | 0.133474 | 7.723142 | 3.738082 | 0.001636 | 0.045556 | -1.1671  |
| ZFP295    | 0.133243 | 8.179883 | 4.732229 | 0.000192 | 1.39E-02 | 0.867511 |
| NFRKB     | 0.131299 | 8.219986 | 3.813281 | 0.00139  | 0.040962 | -1.0124  |
| PCDH21    | 0.130833 | 7.413735 | 3.830125 | 0.00134  | 0.040051 | -0.97774 |
| NARG1L    | 0.129786 | 7.907149 | 3.973501 | 0.000982 | 0.034756 | -0.6826  |
| PTBP1     | 0.12817  | 8.3364   | 3.789017 | 0.001465 | 0.042234 | -1.06233 |
| 1200016B1 | 0.126183 | 8.376874 | 3.73615  | 0.001643 | 0.045561 | -1.17107 |
| LOC10004  | 0.124322 | 8.847834 | 3.786439 | 0.001473 | 4.24E-02 | -1.06763 |
| POU2F1    | 0.123087 | 7.895745 | 3.764478 | 0.001545 | 0.04371  | -1.11281 |
| DHX38     | 0.122661 | 9.170918 | 3.972296 | 0.000984 | 0.034756 | -0.68508 |
| EMD       | 0.121483 | 8.159979 | 3.983455 | 0.000961 | 0.034588 | -0.66211 |
| DUS4L     | 0.119922 | 8.419626 | 3.915404 | 0.001113 | 0.03659  | -0.80219 |
| TMEM2     | 0.11867  | 7.896467 | 3.856223 | 0.001266 | 0.038722 | -0.92402 |
| CEBPB     | 0.116222 | 9.000959 | 3.888086 | 0.001181 | 0.03755  | -0.85843 |
| FBLN2     | 0.114698 | 7.533667 | 3.765901 | 0.00154  | 0.043692 | -1.10989 |
| 5133400G  | 0.111377 | 7.860185 | 3.711818 | 0.001732 | 0.04663  | -1.2211  |
| RUVBL1    | 0.109744 | 8.727501 | 3.808277 | 0.001405 | 0.04123  | -1.0227  |
| TMEM85    | -0.12258 | 11.62307 | -3.99655 | 0.000934 | 0.034092 | -0.63516 |
| SNX25     | -0.12864 | 8.230302 | -4.27491 | 0.000512 | 0.023827 | -0.06322 |
| AKR1C18   | -0.13346 | 7.264306 | -3.69117 | 0.001812 | 0.04785  | -1.26352 |
| HTRA1     | -0.1355  | 9.349731 | -3.67381 | 0.001881 | 0.048488 | -1.2992  |
| AGPAT9    | -0.13619 | 7.277887 | -4.10351 | 0.000741 | 0.029973 | -0.41512 |



|           |          |          |          |          |          |          |
|-----------|----------|----------|----------|----------|----------|----------|
| KCNG4     | -0.13738 | 7.608095 | -4.19945 | 0.000602 | 0.026471 | -0.21801 |
| CCDC111   | -0.14064 | 7.508426 | -3.6908  | 0.001813 | 4.79E-02 | -1.26429 |
| FIP1L1    | -0.14163 | 7.723884 | -4.11505 | 0.000722 | 0.029809 | -0.39141 |
| ZFP161    | -0.14811 | 7.626112 | -4.49337 | 0.00032  | 0.017777 | 0.383233 |
| 1200003CC | -0.15031 | 10.71943 | -3.98046 | 0.000967 | 0.034588 | -0.66828 |
| 9130213BC | -0.15136 | 9.488112 | -4.92837 | 0.000127 | 0.010933 | 1.261364 |
| LAPTM4B   | -0.15276 | 7.557326 | -3.89015 | 0.001176 | 0.03755  | -0.85419 |
| APLP2     | -0.15398 | 12.43777 | -3.78318 | 0.001483 | 0.042541 | -1.07434 |
| COX7A1    | -0.15406 | 7.769965 | -3.68334 | 0.001843 | 0.047873 | -1.27961 |
| LRRC14    | -0.1541  | 7.257886 | -3.86438 | 0.001244 | 0.038154 | -0.90724 |
| CADM2     | -0.15425 | 8.689475 | -4.18652 | 0.000619 | 0.026665 | -0.24457 |
| CSNRP3    | -0.15484 | 9.542514 | -4.01723 | 0.000893 | 0.033582 | -0.59259 |
| HISPPD1   | -0.15746 | 7.835759 | -4.61706 | 0.000246 | 0.015119 | 0.634591 |
| MGLL      | -0.15776 | 9.943782 | -3.6983  | 0.001784 | 4.74E-02 | -1.24888 |
| GPR37L1   | -0.15796 | 9.993285 | -4.09686 | 0.000751 | 0.030038 | -0.4288  |
| LOC54501  | -0.1587  | 7.664849 | -4.34139 | 0.000443 | 0.021465 | 0.072927 |
| ABCA5     | -0.15908 | 7.511068 | -4.01652 | 0.000894 | 0.033582 | -0.59407 |
| NFIC      | -0.15916 | 8.22565  | -3.91966 | 0.001103 | 3.66E-02 | -0.79342 |
| NUDT18    | -0.15916 | 10.70814 | -3.96232 | 0.001006 | 0.035025 | -0.70561 |
| CAPN2     | -0.15924 | 8.271079 | -4.43999 | 0.000359 | 0.019356 | 0.274416 |
| CPSF2     | -0.15924 | 7.55814  | -3.67316 | 0.001884 | 4.85E-02 | -1.30054 |
| HIVEP2    | -0.15942 | 7.432392 | -4.3593  | 0.000427 | 2.12E-02 | 0.10956  |
| VAMP1     | -0.15944 | 7.902481 | -4.14944 | 0.000671 | 0.028655 | -0.32073 |
| NTNG1     | -0.16146 | 8.583457 | -3.96822 | 0.000993 | 0.034756 | -0.69347 |
| C130074G  | -0.16287 | 7.887178 | -3.72017 | 0.001701 | 4.66E-02 | -1.20393 |
| KLHL7     | -0.16338 | 10.11401 | -4.7344  | 0.000192 | 0.013854 | 0.871885 |
| D4BWG09   | -0.16339 | 9.087012 | -3.70221 | 0.001769 | 0.047156 | -1.24085 |
| TOB1      | -0.16389 | 8.347271 | -4.55574 | 0.00028  | 0.016423 | 0.510125 |
| THY1      | -0.16411 | 13.54559 | -4.10972 | 0.000731 | 0.029809 | -0.40236 |
| TYROBP    | -0.16641 | 7.65399  | -3.71202 | 0.001731 | 0.04663  | -1.22069 |
| MARE      | -0.16661 | 7.847496 | -4.14705 | 0.000674 | 0.028687 | -0.32563 |
| ITGB5     | -0.16841 | 8.32545  | -3.83265 | 0.001332 | 0.039945 | -0.97254 |
| SLC30A4   | -0.17042 | 7.703629 | -3.88834 | 0.001181 | 3.76E-02 | -0.8579  |
| HSP105    | -0.17206 | 11.51016 | -3.71724 | 0.001712 | 0.04656  | -1.20996 |
| STAM2     | -0.17226 | 7.866224 | -3.8338  | 0.001329 | 0.039945 | -0.97017 |
| AMIGO1    | -0.1733  | 8.667317 | -4.35829 | 0.000428 | 0.021197 | 0.107494 |
| VPS29     | -0.1734  | 10.97247 | -4.24761 | 0.000543 | 0.02474  | -0.1192  |
| RG9MTD1   | -0.17357 | 8.487556 | -4.92571 | 0.000128 | 0.010933 | 1.256046 |
| FKBP7     | -0.17449 | 7.412932 | -5.56587 | 3.41E-05 | 5.73E-03 | 2.511431 |
| FAM125A   | -0.17535 | 8.708298 | -3.87785 | 0.001208 | 3.78E-02 | -0.8795  |
| ACSBG1    | -0.17768 | 8.492413 | -4.66246 | 0.000223 | 0.014944 | 0.726547 |
| TFRC      | -0.17805 | 10.65107 | -4.67842 | 0.000216 | 1.47E-02 | 0.758826 |
| GJD2      | -0.1791  | 8.00752  | -5.0052  | 0.000108 | 0.010267 | 1.414585 |

|          |          |          |          |          |          |          |
|----------|----------|----------|----------|----------|----------|----------|
| 5730469M | -0.17965 | 9.365089 | -4.06336 | 0.000808 | 0.031579 | -0.4977  |
| 9130422G | -0.18002 | 8.9559   | -4.35271 | 0.000433 | 0.021241 | 0.096099 |
| 1110006G | -0.18171 | 8.167631 | -3.91201 | 0.001122 | 0.03659  | -0.80918 |
| PLXDC1   | -0.18174 | 8.814225 | -4.1184  | 0.000717 | 0.029809 | -0.38452 |
| SGTB     | -0.18209 | 10.29943 | -4.02847 | 0.000871 | 0.033077 | -0.56948 |
| LRR4C    | -0.18257 | 7.886709 | -3.87378 | 0.001219 | 0.037829 | -0.88788 |
| MAPRE3   | -0.18289 | 8.088653 | -4.21584 | 0.000581 | 0.025906 | -0.18438 |
| TIMP4    | -0.18313 | 8.305034 | -4.74454 | 0.000187 | 1.39E-02 | 0.892347 |
| TMEM218  | -0.18373 | 8.539665 | -4.79955 | 0.000167 | 1.27E-02 | 1.003117 |
| PSG23    | -0.18376 | 9.27572  | -3.89508 | 0.001164 | 0.037321 | -0.84402 |
| 4930403O | -0.18405 | 10.30541 | -4.19011 | 0.000614 | 0.026665 | -0.2372  |
| GRSF1    | -0.18488 | 10.11151 | -4.38444 | 0.000404 | 0.020809 | 0.160959 |
| TSPYL4   | -0.18892 | 7.585425 | -3.80682 | 0.001409 | 0.04123  | -1.0257  |
| CAMK2G   | -0.18919 | 10.06756 | -4.65296 | 0.000228 | 0.01502  | 0.70731  |
| GLRX     | -0.19052 | 10.94049 | -4.64108 | 0.000234 | 0.015028 | 0.683265 |
| GABRG2   | -0.19208 | 9.855456 | -6.3027  | 7.94E-06 | 2.93E-03 | 3.887397 |
| DIAP3    | -0.19223 | 7.760914 | -4.20474 | 0.000595 | 0.02628  | -0.20715 |
| PAFAH1B1 | -0.19288 | 9.107184 | -4.01083 | 0.000905 | 0.033693 | -0.60578 |
| LOC10004 | -0.19297 | 12.02162 | -4.09699 | 0.000751 | 0.030038 | -0.42852 |
| OSBPL6   | -0.19315 | 9.332504 | -4.95938 | 0.000119 | 0.010676 | 1.323277 |
| GRIN1    | -0.19335 | 8.440663 | -4.22739 | 0.000567 | 0.025453 | -0.16067 |
| CDV3     | -0.19366 | 10.72005 | -3.76903 | 0.00153  | 4.35E-02 | -1.10345 |
| SKIV2L   | -0.1941  | 9.101456 | -4.65907 | 0.000225 | 1.49E-02 | 0.719688 |
| CRIP1    | -0.19449 | 8.346967 | -5.88087 | 1.81E-05 | 0.004349 | 3.109367 |
| MRPS18C  | -0.19459 | 10.45204 | -3.83923 | 0.001313 | 0.039604 | -0.959   |
| SEPP1    | -0.19499 | 8.726684 | -3.77073 | 0.001524 | 4.35E-02 | -1.09995 |
| LOC10004 | -0.19602 | 12.44281 | -3.94618 | 0.001041 | 0.035683 | -0.73883 |
| FGF1     | -0.19609 | 9.163044 | -3.8521  | 0.001277 | 0.038846 | -0.93252 |
| UBE3A    | -0.19785 | 7.899536 | -5.77814 | 2.23E-05 | 0.004647 | 2.915909 |
| RGS7BP   | -0.19793 | 13.05924 | -5.28005 | 6.12E-05 | 7.88E-03 | 1.957163 |
| JDP2     | -0.19891 | 9.195855 | -4.4484  | 0.000352 | 0.019269 | 0.291571 |
| STMN3    | -0.19989 | 11.12876 | -4.07957 | 0.00078  | 0.030812 | -0.46435 |
| PCDHA6   | -0.20002 | 10.68033 | -3.9944  | 0.000938 | 0.034092 | -0.63959 |
| ANXA5    | -0.20008 | 9.07179  | -4.64668 | 0.000231 | 0.015028 | 0.69459  |
| C1GALT1C | -0.2005  | 9.037114 | -3.74647 | 0.001607 | 4.49E-02 | -1.14984 |
| LRRTM3   | -0.20165 | 8.179193 | -5.35032 | 5.30E-05 | 0.0074   | 2.094408 |
| 4931406C | -0.20166 | 8.329672 | -4.36772 | 0.000419 | 0.021157 | 0.126788 |
| SYNGR1   | -0.20412 | 9.280637 | -4.00286 | 0.000921 | 0.034092 | -0.62218 |
| CBLN2    | -0.20414 | 8.078496 | -4.65828 | 0.000225 | 0.014944 | 0.718087 |
| ZRANB1   | -0.20487 | 8.718941 | -3.87151 | 0.001225 | 0.037898 | -0.89255 |
| HNT      | -0.20575 | 10.53084 | -3.7599  | 0.00156  | 0.04399  | -1.12223 |
| DEPDC6   | -0.20611 | 8.29381  | -3.96823 | 0.000993 | 0.034756 | -0.69344 |
| GPM6A    | -0.20637 | 10.32941 | -4.19237 | 0.000611 | 0.026657 | -0.23254 |

|           |          |          |          |          |          |          |
|-----------|----------|----------|----------|----------|----------|----------|
| ARCN1     | -0.20679 | 7.924603 | -4.72773 | 0.000194 | 0.013854 | 0.858428 |
| SLC39A12  | -0.20684 | 9.773551 | -6.04007 | 1.32E-05 | 0.003582 | 3.406123 |
| ABCD2     | -0.20878 | 8.007285 | -4.26182 | 0.000526 | 0.024251 | -0.09005 |
| SELK      | -0.21038 | 10.29669 | -3.84705 | 0.001291 | 0.039161 | -0.9429  |
| PPP2R2D   | -0.21068 | 10.08132 | -3.68445 | 0.001838 | 4.79E-02 | -1.27733 |
| ZFP365    | -0.2109  | 12.8063  | -4.91611 | 0.000131 | 0.010934 | 1.236872 |
| COX11     | -0.21225 | 8.117175 | -4.20503 | 0.000595 | 0.02628  | -0.20656 |
| NUDT4     | -0.21397 | 10.55454 | -4.30984 | 0.000475 | 0.02266  | 0.008336 |
| ATAD1     | -0.21414 | 9.886556 | -3.9821  | 0.000963 | 0.034588 | -0.6649  |
| ABHD3     | -0.2146  | 8.452553 | -3.71385 | 0.001724 | 0.04663  | -1.21692 |
| TYKI      | -0.21606 | 8.792128 | -5.00296 | 0.000109 | 0.010267 | 1.410115 |
| D0H4S114  | -0.21731 | 11.51109 | -4.39813 | 0.000393 | 0.020507 | 0.188947 |
| ABHD12    | -0.21753 | 9.445109 | -5.65827 | 2.83E-05 | 4.98E-03 | 2.688272 |
| PPP1R3C   | -0.21794 | 10.51775 | -4.02957 | 0.000869 | 0.033077 | -0.56721 |
| PIK3R4    | -0.21821 | 8.103992 | -3.68483 | 0.001837 | 0.047873 | -1.27656 |
| FAM84A    | -0.22028 | 7.918033 | -4.74298 | 0.000188 | 0.013854 | 0.889201 |
| NECAB1    | -0.22083 | 8.96109  | -3.68242 | 0.001846 | 0.047873 | -1.28152 |
| TRPC3     | -0.22376 | 8.770999 | -4.98848 | 0.000112 | 0.010383 | 1.381295 |
| KCNA2     | -0.22386 | 9.17665  | -4.85885 | 0.000147 | 0.011685 | 1.122212 |
| HR        | -0.22426 | 8.828072 | -5.09812 | 8.92E-05 | 0.009141 | 1.59899  |
| TOP2B     | -0.22473 | 7.583709 | -4.95102 | 0.000121 | 0.010676 | 1.30661  |
| AGXT2L1   | -0.22554 | 7.871282 | -5.56138 | 3.44E-05 | 0.005734 | 2.502806 |
| GPC5      | -0.22636 | 8.91444  | -6.2442  | 8.89E-06 | 0.002931 | 3.7811   |
| TBC1D19   | -0.22824 | 8.628206 | -3.9674  | 0.000995 | 0.034756 | -0.69516 |
| OPN3      | -0.23072 | 7.708122 | -4.92378 | 0.000128 | 0.010933 | 1.252193 |
| SLC23A2   | -0.23149 | 8.969781 | -4.0319  | 0.000865 | 0.03307  | -0.56243 |
| ARHGAP2C  | -0.23354 | 10.02217 | -5.09852 | 8.91E-05 | 0.009141 | 1.599795 |
| GOPC      | -0.23363 | 7.672498 | -3.93317 | 0.001071 | 0.036003 | -0.76561 |
| 1110008P1 | -0.23426 | 12.1151  | -5.68931 | 2.66E-05 | 4.96E-03 | 2.747398 |
| SLC2A13   | -0.2351  | 11.19407 | -3.77444 | 0.001512 | 0.043238 | -1.09231 |
| EMB       | -0.23589 | 9.947875 | -4.27522 | 0.000511 | 0.023827 | -0.06259 |
| AI836003  | -0.23615 | 8.946058 | -5.7735  | 2.25E-05 | 4.65E-03 | 2.907131 |
| CYB5      | -0.23919 | 9.140136 | -3.67104 | 0.001893 | 4.85E-02 | -1.3049  |
| PKIG      | -0.23939 | 8.561073 | -3.92078 | 0.0011   | 0.03659  | -0.79113 |
| ATP2B2    | -0.24119 | 9.751188 | -6.59026 | 4.58E-06 | 2.01E-03 | 4.402271 |
| CASC4     | -0.24225 | 8.509575 | -4.70544 | 0.000204 | 0.014236 | 0.813426 |
| GAD1      | -0.24265 | 12.32129 | -4.72193 | 0.000197 | 0.013931 | 0.846732 |
| S100B     | -0.24282 | 7.766454 | -5.04611 | 9.94E-05 | 0.009994 | 1.495888 |
| RFWD2     | -0.2433  | 8.863298 | -3.90366 | 0.001142 | 0.036858 | -0.82637 |
| PI4KA     | -0.24359 | 10.17242 | -3.97264 | 0.000983 | 0.034756 | -0.68436 |
| A530082C  | -0.24514 | 8.569516 | -4.3869  | 0.000402 | 0.020801 | 0.165993 |
| ADAM9     | -0.24516 | 8.772647 | -4.93761 | 0.000125 | 0.010883 | 1.279832 |
| BC048546  | -0.24741 | 9.075915 | -7.95148 | 3.96E-07 | 0.00038  | 6.664412 |

|           |          |          |          |          |          |          |
|-----------|----------|----------|----------|----------|----------|----------|
| RGS4      | -0.24802 | 12.45033 | -5.22856 | 6.81E-05 | 8.16E-03 | 1.85621  |
| ASB13     | -0.24817 | 11.1178  | -4.6267  | 0.000241 | 0.015119 | 0.654123 |
| KCNV1     | -0.24855 | 9.38054  | -4.34614 | 0.000439 | 0.021344 | 0.082658 |
| 5730409EC | -0.24888 | 8.124448 | -4.01185 | 0.000903 | 0.033693 | -0.60366 |
| CLSTN1    | -0.25019 | 10.08447 | -5.29648 | 5.92E-05 | 0.007721 | 1.989316 |
| PTN       | -0.2503  | 11.83842 | -5.48844 | 3.99E-05 | 0.006289 | 2.36233  |
| KCNAB3    | -0.25529 | 7.994942 | -4.4391  | 0.00036  | 0.019356 | 0.272598 |
| MANSC1    | -0.25716 | 9.077627 | -4.87354 | 0.000143 | 1.15E-02 | 1.151653 |
| PMPCB     | -0.25905 | 8.513254 | -4.52525 | 0.000299 | 0.017077 | 0.448127 |
| MRPL20    | -0.25926 | 10.27261 | -3.96781 | 0.000994 | 0.034756 | -0.69431 |
| NRN1      | -0.26008 | 12.58454 | -5.4577  | 4.25E-05 | 6.41E-03 | 2.302931 |
| 1110012J1 | -0.26028 | 10.40025 | -4.62154 | 0.000243 | 1.51E-02 | 0.643667 |
| UCHL5     | -0.26043 | 9.556969 | -5.33008 | 5.52E-05 | 0.007567 | 2.05494  |
| NFU1      | -0.26099 | 8.015269 | -4.5246  | 0.000299 | 0.017077 | 0.44679  |
| PTGES3    | -0.26123 | 9.397217 | -6.06841 | 1.25E-05 | 3.56E-03 | 3.458552 |
| LOC10004  | -0.26379 | 11.05575 | -4.08389 | 0.000773 | 0.03066  | -0.45547 |
| EVL       | -0.2639  | 10.05722 | -5.34725 | 5.33E-05 | 0.0074   | 2.088426 |
| NDRG2     | -0.2642  | 9.481645 | -4.87463 | 0.000142 | 1.15E-02 | 1.153829 |
| NLGN1     | -0.26781 | 8.141828 | -4.10165 | 0.000744 | 0.029973 | -0.41894 |
| DLD       | -0.27088 | 9.035528 | -3.70198 | 0.00177  | 4.72E-02 | -1.24132 |
| DYNLT3    | -0.27147 | 11.61523 | -5.00048 | 0.000109 | 1.03E-02 | 1.405183 |
| COX7B     | -0.2716  | 9.234677 | -3.82714 | 0.001348 | 0.040084 | -0.98388 |
| FGFR1OP2  | -0.27202 | 9.83493  | -3.79947 | 0.001432 | 0.04172  | -1.04083 |
| RGS10     | -0.27231 | 9.908404 | -5.75555 | 2.33E-05 | 0.004725 | 2.87315  |
| TOMM70A   | -0.27275 | 9.464776 | -3.94251 | 0.00105  | 0.035781 | -0.7464  |
| CACYBP    | -0.2729  | 8.237526 | -4.99806 | 0.00011  | 0.010267 | 1.400371 |
| KRT12     | -0.27342 | 9.487761 | -3.90525 | 0.001138 | 0.036843 | -0.8231  |
| PRMT8     | -0.27423 | 9.228719 | -5.29854 | 5.89E-05 | 7.72E-03 | 1.993332 |
| GLRX3     | -0.27618 | 9.166401 | -3.82816 | 0.001345 | 0.040084 | -0.98179 |
| CLCN4-2   | -0.27869 | 8.232154 | -5.26458 | 6.32E-05 | 7.94E-03 | 1.926869 |
| ANK1      | -0.27894 | 8.847987 | -4.57955 | 0.000266 | 0.015965 | 0.558473 |
| LOC10004  | -0.28038 | 8.172219 | -6.29037 | 8.13E-06 | 0.002931 | 3.865028 |
| RASSF3    | -0.28138 | 8.629859 | -4.61587 | 0.000246 | 0.015119 | 0.632171 |
| HAPLN4    | -0.28255 | 9.550447 | -7.14502 | 1.64E-06 | 1.11E-03 | 5.359115 |
| SLC24A3   | -0.28262 | 11.68753 | -4.43476 | 0.000363 | 0.019438 | 0.263739 |
| FGF12     | -0.28466 | 9.618374 | -5.92029 | 1.68E-05 | 4.21E-03 | 3.183181 |
| CAMKK2    | -0.28579 | 9.581449 | -6.24587 | 8.86E-06 | 2.93E-03 | 3.784143 |
| SORL1     | -0.286   | 11.37858 | -6.05671 | 1.28E-05 | 3.56E-03 | 3.436912 |
| SEPT7     | -0.2879  | 8.206913 | -4.35909 | 0.000427 | 0.021197 | 0.109144 |
| KPNB1     | -0.29227 | 10.22433 | -4.19348 | 0.00061  | 0.026657 | -0.23027 |
| GPM6B     | -0.29731 | 8.30149  | -4.50472 | 0.000312 | 0.017629 | 0.40633  |
| GJB6      | -0.30207 | 10.75613 | -3.79013 | 0.001461 | 0.042234 | -1.06004 |
| JAK1      | -0.303   | 8.622206 | -4.2817  | 0.000504 | 0.023753 | -0.0493  |

|           |          |          |          |          |          |          |
|-----------|----------|----------|----------|----------|----------|----------|
| CDH22     | -0.3059  | 7.891256 | -5.02044 | 0.000105 | 1.03E-02 | 1.444899 |
| YWHAE     | -0.30668 | 8.61883  | -3.86641 | 0.001238 | 0.038154 | -0.90305 |
| LOC100041 | -0.31017 | 8.855368 | -5.052   | 9.82E-05 | 9.97E-03 | 1.507586 |
| PPM1L     | -0.31022 | 10.43274 | -6.4373  | 6.13E-06 | 2.49E-03 | 4.129985 |
| ALDH1A1   | -0.31183 | 7.92979  | -6.21909 | 9.33E-06 | 2.98E-03 | 3.735303 |
| OSBP2     | -0.31423 | 9.051612 | -4.62867 | 0.00024  | 0.015119 | 0.658111 |
| NPY       | -0.31586 | 11.02052 | -7.55872 | 7.82E-07 | 6.35E-04 | 6.041317 |
| UBE2J1    | -0.31594 | 8.766111 | -5.46525 | 4.19E-05 | 0.006402 | 2.317532 |
| CCNG2     | -0.31753 | 9.25757  | -5.53883 | 3.60E-05 | 0.005851 | 2.459448 |
| RELL2     | -0.31835 | 10.52928 | -5.22105 | 6.91E-05 | 8.20E-03 | 1.841457 |
| ARC       | -0.32181 | 10.64455 | -4.31834 | 0.000466 | 0.022351 | 0.025745 |
| P2RY12    | -0.32334 | 8.52596  | -6.64262 | 4.15E-06 | 2.01E-03 | 4.494641 |
| PTGDS     | -0.32739 | 9.929905 | -3.81919 | 0.001372 | 0.040553 | -1.00024 |
| PIK3CA    | -0.32815 | 7.847088 | -5.47689 | 4.09E-05 | 0.006344 | 2.340021 |
| FAM107A   | -0.34239 | 11.56403 | -4.07815 | 0.000782 | 0.030812 | -0.46727 |
| LOC66883  | -0.34588 | 9.740829 | -4.67688 | 0.000216 | 0.014736 | 0.755705 |
| SLC7A10   | -0.34672 | 8.636367 | -8.76033 | 1.04E-07 | 1.56E-04 | 7.874378 |
| SLC12A5   | -0.34686 | 8.211898 | -4.73845 | 0.00019  | 0.013854 | 0.880055 |
| FOS       | -0.3488  | 9.766477 | -5.01544 | 0.000106 | 0.010267 | 1.434955 |
| SLC25A4   | -0.35011 | 7.746036 | -3.68353 | 0.001842 | 0.047873 | -1.27923 |
| PVALB     | -0.3536  | 11.5717  | -5.42351 | 4.56E-05 | 0.006682 | 2.236689 |
| RORA      | -0.37532 | 8.983488 | -7.16237 | 1.59E-06 | 1.11E-03 | 5.388273 |
| A030009H  | -0.37707 | 9.0145   | -4.10923 | 0.000732 | 0.029809 | -0.40337 |
| GLRX2     | -0.37883 | 8.893965 | -6.73253 | 3.51E-06 | 1.85E-03 | 4.652253 |
| LOC100041 | -0.39051 | 8.460216 | -6.628   | 4.27E-06 | 0.002014 | 4.468888 |
| HSD11B1   | -0.41223 | 9.321022 | -9.21458 | 5.05E-08 | 1.28E-04 | 8.5123   |
| ID2       | -0.42203 | 9.266153 | -4.54884 | 0.000284 | 0.016575 | 0.496087 |
| HUWE1     | -0.42629 | 9.578061 | -5.15393 | 7.94E-05 | 9.01E-03 | 1.7093   |
| SCN1A     | -0.42909 | 10.25208 | -7.12948 | 1.69E-06 | 0.001112 | 5.332971 |
| MAP2K1    | -0.4326  | 9.565388 | -5.90789 | 1.72E-05 | 0.004217 | 3.159982 |
| NDUFB5    | -0.43488 | 10.20906 | -3.68588 | 0.001832 | 4.79E-02 | -1.27441 |
| GLUL      | -0.43666 | 8.428036 | -5.8015  | 2.12E-05 | 0.004588 | 2.960036 |
| NDRG4     | -0.4372  | 12.05689 | -4.59213 | 0.000259 | 0.015721 | 0.58401  |
| ATP5A1    | -0.45175 | 10.89034 | -3.9146  | 0.001115 | 3.66E-02 | -0.80384 |
| DUSP1     | -0.46954 | 10.59118 | -6.10097 | 1.17E-05 | 3.44E-03 | 3.518644 |
| NEFM      | -0.61056 | 10.04288 | -4.56676 | 0.000274 | 0.016134 | 0.532502 |
| NPAS4     | -0.62709 | 8.183955 | -14.7559 | 4.00E-11 | 4.22E-07 | 14.34863 |

### DEGs in susceptible left mPFC

adj.P.Value < 0.05

DEGup 234

DEGdown 237

| Gene      | logFC    | AveExpr  | t        | P.Value   | adj.P.Val | B          |
|-----------|----------|----------|----------|-----------|-----------|------------|
| HBA-A1    | 1.10867  | 12.60395 | 16.25222 | 5.34E-11  | 5.63E-07  | 1.43E+01   |
| HBB-B1    | 0.590954 | 8.799639 | 6.131656 | 1.84E-05  | 2.73E-03  | 3.1448868  |
| WFS1      | 0.453204 | 8.924659 | 8.213079 | 5.79E-07  | 3.79E-04  | 6.426525   |
| ALAS2     | 0.419706 | 7.583163 | 6.580325 | 8.30E-06  | 0.001835  | 3.9078195  |
| MGP       | 0.404839 | 8.405792 | 8.620245 | 3.14E-07  | 3.21E-04  | 6.9940087  |
| PFDN2     | 0.399404 | 11.04169 | 4.439209 | 0.000467  | 0.0221843 | 0.0107246  |
| IGF2      | 0.395417 | 9.499371 | 7.013057 | 3.96E-06  | 1.13E-03  | 4.6144622  |
| CPNE6     | 0.375195 | 11.49593 | 6.72518  | 6.46E-06  | 1.55E-03  | 4.1475604  |
| KLF16     | 0.367043 | 8.781993 | 6.057422 | 2.10E-05  | 2.86E-03  | 3.0157068  |
| CCDC85B   | 0.346065 | 10.26655 | 4.010052 | 0.0011152 | 0.0352762 | -0.8328261 |
| DLG4      | 0.340462 | 9.496925 | 5.713583 | 3.95E-05  | 0.0042512 | 2.4066542  |
| FAM148C   | 0.334552 | 8.862439 | 5.53744  | 5.49E-05  | 0.0054007 | 2.0879668  |
| TSC22D1   | 0.333725 | 9.097877 | 6.529165 | 9.08E-06  | 0.0019157 | 3.8223805  |
| TMEM198   | 0.331863 | 9.405492 | 4.882984 | 0.0001933 | 0.0119274 | 0.8670723  |
| LY6A      | 0.328519 | 9.565472 | 6.93404  | 4.53E-06  | 1.20E-03  | 4.4875679  |
| CDKN1C    | 0.326102 | 8.447607 | 7.172867 | 3.03E-06  | 9.26E-04  | 4.868194   |
| DACT2     | 0.324963 | 8.467647 | 4.732067 | 0.0002603 | 0.0143057 | 0.5780989  |
| PROSAPIP1 | 0.323047 | 10.43257 | 6.320412 | 1.31E-05  | 0.0022561 | 3.4695961  |
| CAR4      | 0.315639 | 8.937582 | 5.050089 | 0.0001394 | 0.0096805 | 1.1839982  |
| LPL       | 0.3155   | 9.145933 | 7.218152 | 2.81E-06  | 0.0009102 | 4.9393883  |
| MFGE8     | 0.310553 | 11.42435 | 5.980808 | 2.41E-05  | 0.0030698 | 2.8815185  |
| LYZ       | 0.309988 | 8.308757 | 6.637315 | 7.52E-06  | 1.73E-03  | 4.0025236  |
| SLC38A5   | 0.309208 | 8.130117 | 7.471316 | 1.86E-06  | 0.0006543 | 5.3316943  |
| STK32C    | 0.306801 | 9.137387 | 5.321725 | 8.26E-05  | 0.0069188 | 1.6917524  |
| CACNA1H   | 0.304843 | 9.677641 | 5.36814  | 7.56E-05  | 0.0064872 | 1.7775431  |
| COTL1     | 0.301485 | 9.645081 | 6.07048  | 2.05E-05  | 0.0028596 | 3.0384914  |
| NME2      | 0.30083  | 10.32974 | 6.112609 | 1.90E-05  | 2.79E-03  | 3.1118212  |
| AHI1      | 0.300192 | 10.57708 | 4.981479 | 0.0001594 | 0.0102239 | 1.0542769  |
| ECE1      | 0.298461 | 8.707794 | 5.705022 | 4.01E-05  | 4.27E-03  | 2.391269   |
| SLC13A4   | 0.297359 | 7.609667 | 6.249755 | 1.49E-05  | 0.0024134 | 3.3486814  |
| HAP1      | 0.296352 | 9.718132 | 5.785578 | 3.45E-05  | 4.01E-03  | 2.5356245  |
| C1QTNF4   | 0.295476 | 10.68126 | 4.843151 | 0.000209  | 0.0124617 | 0.7910461  |
| CPNE4     | 0.295428 | 10.03049 | 5.522666 | 5.64E-05  | 0.0054631 | 2.0610364  |
| HPCA      | 0.290398 | 12.20839 | 5.650305 | 4.44E-05  | 0.0045507 | 2.2926797  |
| ABHD14B   | 0.28895  | 9.130865 | 5.393313 | 7.21E-05  | 0.0064327 | 1.8239501  |
| NRXN2     | 0.288636 | 10.91045 | 4.628631 | 0.0003196 | 0.0166164 | 0.3786448  |
| NR2F6     | 0.288494 | 8.718306 | 6.136421 | 1.82E-05  | 2.73E-03  | 3.1531502  |

|              |          |          |          |           |           |            |
|--------------|----------|----------|----------|-----------|-----------|------------|
| ANXA2        | 0.288297 | 8.2587   | 6.968733 | 4.27E-06  | 0.0011854 | 4.5434006  |
| SLC8A2       | 0.286977 | 8.434484 | 6.789719 | 5.79E-06  | 1.47E-03  | 4.2533385  |
| TIAM1        | 0.286631 | 10.38899 | 5.422717 | 6.82E-05  | 0.006148  | 1.8780468  |
| IFITM3       | 0.28368  | 8.690011 | 5.874812 | 2.93E-05  | 0.0035858 | 2.6944218  |
| GRASP        | 0.282582 | 9.44881  | 5.384685 | 7.33E-05  | 6.43E-03  | 1.8080533  |
| FOSB         | 0.281432 | 8.376133 | 4.683923 | 0.0002864 | 0.0153395 | 0.4853984  |
| GRP          | 0.280555 | 8.925961 | 3.911247 | 0.0013651 | 3.90E-02  | -1.0283601 |
| IGSF3        | 0.279533 | 8.42896  | 6.229192 | 1.54E-05  | 2.47E-03  | 3.3133502  |
| SGK1         | 0.278326 | 11.44792 | 6.255713 | 1.47E-05  | 2.41E-03  | 3.358907   |
| ANAPC5       | 0.277793 | 10.00353 | 4.136233 | 0.0008621 | 0.0306319 | -0.5836722 |
| PNCK         | 0.277513 | 9.398202 | 5.571474 | 5.15E-05  | 0.0051251 | 2.1498868  |
| VPS25        | 0.27487  | 8.981466 | 6.479644 | 9.90E-06  | 0.0019864 | 3.7392951  |
| ECHDC2       | 0.274129 | 8.450159 | 5.694837 | 4.09E-05  | 0.0042712 | 2.3729503  |
| PDE2A        | 0.274091 | 9.818303 | 4.385343 | 0.0005205 | 0.0234715 | -0.0944699 |
| RILPL1       | 0.273343 | 9.735163 | 5.747448 | 3.71E-05  | 0.0040842 | 2.4674122  |
| PPARGC1B     | 0.273311 | 9.531282 | 4.87587  | 0.000196  | 0.0119554 | 0.853509   |
| ELTD1        | 0.266945 | 8.236378 | 5.718586 | 3.91E-05  | 0.0042512 | 2.4156402  |
| DCN          | 0.266474 | 7.854345 | 6.31416  | 1.33E-05  | 0.0022561 | 3.4589274  |
| GNB2         | 0.265266 | 10.99294 | 5.619258 | 4.71E-05  | 0.0047762 | 2.2365477  |
| FUS          | 0.264729 | 8.26822  | 4.127318 | 0.0008779 | 0.030881  | -0.6012495 |
| DYNC1H1      | 0.264323 | 10.29217 | 3.847951 | 0.0015544 | 0.0413887 | -1.1537614 |
| FDPS         | 0.26422  | 10.83188 | 4.368009 | 0.000539  | 0.0236003 | -0.1283694 |
| LOC100047619 | 0.263621 | 10.48969 | 3.924676 | 0.0013281 | 0.0385467 | -1.0017676 |
| S100A11      | 0.26329  | 7.936864 | 6.028579 | 2.21E-05  | 2.88E-03  | 2.965293   |
| ACTR1A       | 0.263104 | 10.82985 | 6.165118 | 1.73E-05  | 0.0026456 | 3.2028445  |
| CACNB3       | 0.262536 | 8.971961 | 6.028577 | 2.21E-05  | 0.0028839 | 2.9652895  |
| AI662250     | 0.261129 | 8.286352 | 4.690801 | 0.0002825 | 0.0152866 | 0.4986571  |
| ITPKA        | 0.260705 | 11.18222 | 4.877195 | 0.0001955 | 0.0119554 | 0.8560357  |
| HNRNPK       | 0.259455 | 8.520658 | 5.325329 | 8.20E-05  | 0.0069188 | 1.6984243  |
| LOC100048301 | 0.258286 | 8.750746 | 5.140221 | 0.0001171 | 0.0086843 | 1.3535274  |
| RAB3GAP2     | 0.258041 | 9.081676 | 4.371225 | 0.0005355 | 0.0236003 | -0.1220777 |
| FCHO1        | 0.257287 | 9.802169 | 4.130274 | 0.0008726 | 0.0307984 | -0.5954207 |
| PLD3         | 0.256961 | 10.79672 | 4.240735 | 0.0006972 | 0.0276592 | -0.3779557 |
| LOC100045782 | 0.25485  | 9.439505 | 4.180305 | 0.0007882 | 0.0298767 | -0.4968359 |
| PALMD        | 0.254095 | 8.656403 | 5.845888 | 3.09E-05  | 0.0036651 | 2.643078   |
| DPP10        | 0.251812 | 10.53745 | 5.314477 | 8.38E-05  | 0.0069601 | 1.6783287  |
| DYNLL2       | 0.251663 | 8.9233   | 5.118607 | 0.0001221 | 0.0088641 | 1.3129668  |
| KCTD10       | 0.250777 | 9.086462 | 4.319116 | 0.0005949 | 0.0248134 | -0.2241124 |
| PSME2        | 0.250322 | 7.759331 | 5.34083  | 7.97E-05  | 6.78E-03  | 1.7271005  |
| PTPRK        | 0.250319 | 8.592393 | 4.976834 | 0.0001608 | 0.0102239 | 1.0454739  |
| SLC2A1       | 0.24952  | 9.947545 | 4.774086 | 0.0002395 | 0.0135892 | 0.6588075  |
| RPS4Y2       | 0.247763 | 7.95517  | 4.172338 | 0.000801  | 0.0299766 | -0.5125256 |
| PDGFB        | 0.247513 | 9.157739 | 4.43728  | 0.0004688 | 0.0221843 | 0.0069616  |

|               |          |          |          |           |           |            |
|---------------|----------|----------|----------|-----------|-----------|------------|
| FLT1          | 0.246893 | 10.00623 | 6.320386 | 1.31E-05  | 2.26E-03  | 3.4695523  |
| TCEAL3        | 0.246051 | 8.924958 | 5.134806 | 0.0001183 | 0.0086843 | 1.3433712  |
| ARL6IP1       | 0.245685 | 12.59459 | 4.848875 | 0.0002067 | 0.0123922 | 0.8019821  |
| YRDC          | 0.245408 | 8.128247 | 4.550463 | 0.0003736 | 0.0189468 | 0.2272131  |
| 1300013J15RIK | 0.243151 | 7.416783 | 5.447551 | 6.50E-05  | 0.0060197 | 1.9236425  |
| LOC100045019  | 0.241891 | 11.22315 | 3.806117 | 0.0016938 | 0.0430495 | -1.2366827 |
| BAI2          | 0.241786 | 10.29107 | 4.888415 | 0.0001912 | 1.19E-02  | 0.8774248  |
| STMN4         | 0.240105 | 9.660887 | 5.4559   | 6.40E-05  | 0.0060197 | 1.9389533  |
| CXX1C         | 0.239158 | 10.42897 | 4.598759 | 0.0003392 | 0.0175494 | 0.3208434  |
| KCTD4         | 0.238774 | 8.452961 | 4.801307 | 0.000227  | 0.0131611 | 0.7109898  |
| HRMT1L2       | 0.237397 | 10.48449 | 4.335405 | 0.0005756 | 0.0245933 | -0.1921952 |
| TMEM121       | 0.23699  | 8.855934 | 5.613004 | 4.76E-05  | 0.0047864 | 2.2252238  |
| ARHGEF15      | 0.236958 | 8.08675  | 5.307947 | 8.48E-05  | 6.99E-03  | 1.6662301  |
| DGKG          | 0.235553 | 10.63397 | 4.396613 | 0.0005088 | 0.023207  | -0.0724417 |
| MID1          | 0.233447 | 7.855269 | 5.900405 | 2.80E-05  | 3.47E-03  | 2.7397491  |
| D8ERTD82E     | 0.233143 | 7.809519 | 4.577768 | 0.0003538 | 0.0180771 | 0.2801769  |
| EVC2          | 0.231504 | 8.157568 | 4.548278 | 0.0003752 | 0.0189468 | 0.2229731  |
| AKAP8L        | 0.230903 | 10.04768 | 3.920483 | 0.0013395 | 0.038729  | -1.0100698 |
| PRMT2         | 0.228779 | 11.1476  | 4.833685 | 0.0002129 | 0.0126248 | 0.7729525  |
| ERP29         | 0.228555 | 11.32563 | 4.03534  | 0.001059  | 0.0337638 | -0.7828371 |
| NBL1          | 0.228089 | 8.887872 | 3.848153 | 0.0015537 | 0.0413887 | -1.1533627 |
| COL6A1        | 0.227131 | 9.225453 | 5.014508 | 0.0001494 | 0.0099806 | 1.1167969  |
| PKNOX2        | 0.227106 | 8.955686 | 4.989543 | 0.0001569 | 0.0102197 | 1.0695528  |
| CACNG3        | 0.225866 | 8.812613 | 4.347013 | 0.0005623 | 0.0242196 | -0.1694615 |
| SNHG11        | 0.225844 | 13.09614 | 3.686952 | 0.0021642 | 0.0493936 | -1.4729496 |
| SNRPD1        | 0.224622 | 10.48105 | 4.325643 | 0.0005871 | 0.0246919 | -0.2113211 |
| FXYS5         | 0.224501 | 7.826416 | 5.247223 | 9.53E-05  | 0.0075597 | 1.5534432  |
| LOC100046207  | 0.224191 | 11.82016 | 5.115811 | 0.0001227 | 0.0088641 | 1.3077153  |
| MAPK1         | 0.222536 | 11.3214  | 5.2817   | 8.92E-05  | 0.0072698 | 1.6175401  |
| MORN4         | 0.2221   | 8.545751 | 4.297823 | 0.0006211 | 0.0257019 | -0.2658628 |
| PRR7          | 0.221835 | 9.384036 | 4.401859 | 0.0005034 | 0.023199  | -0.0621896 |
| COL5A1        | 0.221131 | 8.052943 | 5.779622 | 3.49E-05  | 4.01E-03  | 2.5249838  |
| FHL1          | 0.220897 | 10.33251 | 4.642925 | 0.0003107 | 0.0162302 | 0.4062721  |
| OGN           | 0.219502 | 7.387425 | 4.451214 | 0.0004558 | 0.0220553 | 0.0341371  |
| SF3B2         | 0.219315 | 11.17369 | 4.859247 | 0.0002025 | 0.0122113 | 0.8217895  |
| EGFL7         | 0.219107 | 8.768657 | 5.082039 | 0.000131  | 0.0092349 | 1.2442084  |
| RAMP3         | 0.218814 | 8.392446 | 5.152324 | 0.0001144 | 0.0085603 | 1.3762131  |
| WBP7          | 0.218496 | 8.504333 | 3.813857 | 0.0016671 | 0.0427012 | -1.2213384 |
| UACA          | 0.218276 | 7.967921 | 5.226543 | 9.91E-05  | 0.0077505 | 1.5149219  |
| ACSL5         | 0.218068 | 11.33073 | 4.100462 | 0.0009273 | 0.0313176 | -0.6542286 |
| BEX4          | 0.217383 | 9.108064 | 4.78983  | 0.0002322 | 0.0133728 | 0.6889984  |
| G3BP1         | 0.216513 | 8.93059  | 3.806201 | 0.0016935 | 4.30E-02  | -1.2365165 |
| VWF           | 0.215803 | 7.58027  | 4.787684 | 0.0002332 | 0.0133728 | 0.6848849  |



|               |          |          |          |           |           |            |
|---------------|----------|----------|----------|-----------|-----------|------------|
| RLBP1         | 0.215552 | 7.800433 | 4.439618 | 0.0004666 | 0.0221843 | 0.011523   |
| RPS2          | 0.215535 | 12.2098  | 3.940707 | 0.0012852 | 0.0380789 | -0.9700267 |
| PPM1M         | 0.213725 | 8.633396 | 3.782055 | 0.0017797 | 0.0445044 | -1.2843849 |
| ARD1          | 0.212775 | 8.805313 | 4.576603 | 0.0003546 | 0.0180771 | 0.2779179  |
| EXOSC2        | 0.212768 | 8.369204 | 4.423553 | 0.0004819 | 0.0224362 | -0.0198243 |
| 5430437P03RIK | 0.212472 | 9.352445 | 4.978953 | 0.0001602 | 0.0102239 | 1.0494903  |
| PPM1G         | 0.21219  | 7.909943 | 4.329751 | 0.0005822 | 0.024676  | -0.2032709 |
| ATG16L1       | 0.211326 | 10.13511 | 5.659254 | 4.37E-05  | 0.0045192 | 2.3088324  |
| C79267        | 0.211185 | 7.870549 | 4.516081 | 0.0004002 | 0.019922  | 0.1604268  |
| 2310067B10RIK | 0.210724 | 8.900398 | 4.579273 | 0.0003527 | 0.0180771 | 0.2830926  |
| GTPBP6        | 0.210354 | 8.148405 | 4.132072 | 0.0008694 | 0.0307888 | -0.591876  |
| LOC100045403  | 0.210303 | 12.55801 | 4.21567  | 0.0007335 | 0.028586  | -0.4272372 |
| MED6          | 0.207714 | 8.938034 | 4.464517 | 0.0004438 | 0.0215835 | 0.0600655  |
| IMPDH2        | 0.20718  | 9.440955 | 4.686385 | 0.000285  | 0.0153395 | 0.4901459  |
| UBQLN4        | 0.206136 | 9.872981 | 4.677907 | 0.0002898 | 0.0154455 | 0.4737988  |
| ARL2BP        | 0.20535  | 8.993257 | 5.133991 | 0.0001185 | 0.0086843 | 1.3418414  |
| PER2          | 0.205161 | 9.974818 | 3.927527 | 0.0013203 | 0.0384905 | -0.9961223 |
| SPAG5         | 0.20433  | 8.134456 | 4.241632 | 0.0006959 | 0.0276592 | -0.3761911 |
| ERGIC3        | 0.204214 | 9.800817 | 3.776102 | 0.0018016 | 4.46E-02  | -1.2961878 |
| VIP           | 0.204022 | 10.46507 | 3.710816 | 0.0020605 | 0.0477897 | -1.4256352 |
| LOC100046744  | 0.203418 | 8.63062  | 3.969435 | 0.0012118 | 0.0366412 | -0.9131678 |
| ORF61         | 0.201986 | 9.498599 | 4.048449 | 0.001031  | 0.033274  | -0.756932  |
| ACCN2         | 0.201765 | 9.589577 | 3.691213 | 0.0021453 | 4.91E-02  | -1.464502  |
| 1600002K03RIK | 0.201738 | 7.945538 | 4.211458 | 0.0007398 | 0.0287044 | -0.4355217 |
| CDH13         | 0.201347 | 8.439697 | 4.981093 | 0.0001595 | 0.0102239 | 1.0535458  |
| SNAPC4        | 0.200158 | 9.161214 | 4.082347 | 0.0009621 | 0.0320824 | -0.6899843 |
| HDGF          | 0.199805 | 10.1173  | 4.167164 | 0.0008095 | 0.0300803 | -0.5227162 |
| 9030607L17RIK | 0.198879 | 8.32339  | 3.964173 | 0.0012249 | 0.0368195 | -0.9235816 |
| EG633640      | 0.19859  | 7.723142 | 4.07784  | 0.000971  | 0.0321229 | -0.6988831 |
| FKBP1A        | 0.198046 | 11.0073  | 3.787659 | 0.0017593 | 0.0440993 | -1.2732749 |
| SPARC         | 0.197772 | 8.820703 | 4.43092  | 0.0004748 | 0.0223256 | -0.0054471 |
| HSF1          | 0.197749 | 9.898833 | 3.96288  | 0.0012281 | 0.0368195 | -0.9261392 |
| CITED4        | 0.197618 | 7.933663 | 4.181225 | 0.0007867 | 0.0298767 | -0.4950253 |
| EIF2B5        | 0.197133 | 9.632521 | 3.880731 | 0.0014533 | 0.0401833 | -1.0888087 |
| STARD8        | 0.196558 | 8.988055 | 4.781667 | 0.000236  | 0.0134595 | 0.6733473  |
| DGCR6         | 0.196363 | 8.539485 | 3.6838   | 0.0021783 | 4.94E-02  | -1.4791996 |
| ICAM5         | 0.195766 | 9.429693 | 3.840948 | 0.0015769 | 0.0413953 | -1.1676419 |
| PSME1         | 0.195076 | 8.940949 | 4.074839 | 0.000977  | 0.0322191 | -0.7048071 |
| MED30         | 0.193679 | 10.05659 | 4.147225 | 0.000843  | 0.0303393 | -0.5620041 |
| KCNQ2         | 0.193458 | 7.858577 | 4.347927 | 0.0005612 | 0.0242196 | -0.167672  |
| 2410004L22RIK | 0.193341 | 7.654476 | 3.842845 | 0.0015708 | 4.14E-02  | -1.1638825 |
| LOC100047651  | 0.193003 | 10.44043 | 4.536356 | 0.0003843 | 0.0192202 | 0.1998247  |
| RAB35         | 0.192714 | 10.63935 | 3.682146 | 0.0021857 | 0.0494369 | -1.4824773 |

|               |          |          |          |           |           |             |
|---------------|----------|----------|----------|-----------|-----------|-------------|
| CH25H         | 0.191093 | 7.330832 | 3.951737 | 0.0012565 | 0.0374563 | -0.9481934  |
| DUS4L         | 0.190795 | 8.419626 | 4.813677 | 0.0002215 | 0.0129149 | 0.7346763   |
| BRP16         | 0.189409 | 8.724896 | 3.854166 | 0.0015347 | 0.0411052 | -1.1414446  |
| FBXO21        | 0.189249 | 10.62954 | 4.255054 | 0.0006772 | 0.0273142 | -0.3498191  |
| EIF6          | 0.187552 | 9.743348 | 3.90909  | 0.0013712 | 0.0389669 | -1.0326323  |
| TUT1          | 0.187351 | 8.435789 | 4.104504 | 0.0009196 | 0.0312596 | -0.6462537  |
| 1600014C10RIK | 0.18637  | 8.808375 | 4.376867 | 0.0005294 | 0.0236003 | -0.11110431 |
| METTL3        | 0.185593 | 9.368955 | 4.177643 | 0.0007925 | 0.0298767 | -0.5020777  |
| CLPTM1L       | 0.18539  | 10.78891 | 3.726173 | 0.0019964 | 0.0470804 | -1.3951854  |
| SFRS5         | 0.183728 | 10.07632 | 4.039858 | 0.0010493 | 0.033555  | -0.7739076  |
| CDC42BPB      | 0.182365 | 10.16177 | 3.880076 | 0.0014552 | 0.0401833 | -1.0901066  |
| JTV1          | 0.182021 | 8.567839 | 4.060615 | 0.0010058 | 0.0328598 | -0.7328986  |
| P140          | 0.181598 | 8.305353 | 3.780027 | 0.0017871 | 0.0445297 | -1.2884073  |
| EXDL2         | 0.180415 | 10.34811 | 3.924125 | 0.0013296 | 0.0385467 | -1.0028587  |
| TOMM34        | 0.179828 | 9.343561 | 4.371422 | 0.0005353 | 0.0236003 | -0.1216932  |
| CACNA1A       | 0.178846 | 7.746361 | 3.8856   | 0.0014388 | 4.01E-02  | -1.0791624  |
| GJB2          | 0.178833 | 7.55037  | 4.395226 | 0.0005102 | 0.023207  | -0.0751508  |
| WNT4          | 0.178766 | 7.771687 | 4.413055 | 0.0004922 | 0.0227814 | -0.0403207  |
| ALDH4A1       | 0.178645 | 9.816682 | 3.91401  | 0.0013574 | 0.0389669 | -1.0228881  |
| CENPT         | 0.178212 | 8.876303 | 3.844847 | 0.0015643 | 0.0413887 | -1.1599148  |
| SCN3B         | 0.177785 | 8.282374 | 4.160599 | 0.0008204 | 0.0303104 | -0.5356494  |
| MYST1         | 0.177414 | 8.634195 | 3.685869 | 0.002169  | 0.0493936 | -1.4750959  |
| UBE2L3        | 0.1774   | 11.23016 | 3.743374 | 0.001927  | 0.0462172 | -1.36108    |
| 9030624J02RIK | 0.177345 | 9.357109 | 4.044905 | 0.0010385 | 0.0334135 | -0.7639353  |
| GLP2R         | 0.177155 | 7.644971 | 3.810616 | 0.0016782 | 0.0428824 | -1.2277642  |
| SERPINF1      | 0.176394 | 8.022009 | 4.118185 | 0.0008944 | 0.0309516 | -0.6192629  |
| SPRN          | 0.175936 | 8.000731 | 3.825298 | 0.0016284 | 0.0421581 | -1.198661   |
| 2610507B11RIK | 0.175418 | 9.766797 | 4.008442 | 0.0011188 | 0.0352762 | -0.8360096  |
| DDIT4L        | 0.17504  | 8.776336 | 4.016431 | 0.0011007 | 0.0349879 | -0.8202129  |
| CBFA2T3H      | 0.174824 | 8.344349 | 3.790532 | 0.0017489 | 0.044049  | -1.2675793  |
| ATG9B         | 0.174356 | 7.994021 | 3.854319 | 0.0015342 | 0.0411052 | -1.1411418  |
| PDE1B         | 0.174308 | 10.87632 | 3.857475 | 0.0015243 | 0.0410354 | -1.1348889  |
| LOC100044829  | 0.173753 | 9.425801 | 3.863104 | 0.0015068 | 4.09E-02  | -1.1237346  |
| CYBA          | 0.173664 | 7.991633 | 3.754018 | 0.0018853 | 0.0455269 | -1.339975   |
| THOC4         | 0.172658 | 9.268186 | 3.876483 | 0.001466  | 4.02E-02  | -1.0972236  |
| RAC3          | 0.172125 | 8.019743 | 3.730609 | 0.0019783 | 0.0469987 | -1.3863892  |
| FBXL6         | 0.172028 | 8.625924 | 3.724534 | 0.0020031 | 0.0470804 | -1.3984343  |
| NNMT          | 0.171715 | 7.510133 | 3.869055 | 0.0014885 | 4.06E-02  | -1.1119428  |
| MBD3L2        | 0.170582 | 7.391808 | 3.747729 | 0.0019098 | 0.0460142 | -1.3524445  |
| ARSJ          | 0.169815 | 7.545497 | 4.148073 | 0.0008416 | 0.0303393 | -0.5603324  |
| PLD4          | 0.168975 | 7.462028 | 4.054818 | 0.0010177 | 0.0331483 | -0.74435    |
| CENTG1        | 0.168897 | 8.552411 | 4.119972 | 0.0008911 | 0.0309516 | -0.6157381  |
| NAPEPLD       | 0.168592 | 7.945383 | 4.264824 | 0.000664  | 0.0269491 | -0.3306298  |

|               |          |          |          |           |           |            |
|---------------|----------|----------|----------|-----------|-----------|------------|
| APBA3         | 0.168484 | 8.358946 | 3.830147 | 0.0016122 | 0.0420422 | -1.1890481 |
| BOK           | 0.16711  | 9.008271 | 3.729728 | 0.0019818 | 4.70E-02  | -1.3881365 |
| GABBR1        | 0.166092 | 8.463038 | 3.766133 | 0.0018389 | 0.0452348 | -1.3159532 |
| HDGFRP2       | 0.165088 | 10.8939  | 3.779374 | 0.0017895 | 0.0445297 | -1.2897012 |
| SIAT7F        | 0.164264 | 7.657323 | 3.70238  | 0.0020966 | 0.048308  | -1.4423616 |
| CIB2          | 0.163965 | 8.988893 | 3.986992 | 0.001169  | 0.0359229 | -0.878433  |
| PVRL3         | 0.163359 | 8.039421 | 4.114824 | 0.0009005 | 0.0309547 | -0.6258922 |
| 2610110G12RIK | 0.161943 | 8.67709  | 3.828135 | 0.0016189 | 4.21E-02  | -1.1930373 |
| MAPRE2        | 0.160067 | 12.07198 | 3.74468  | 0.0019218 | 0.0461982 | -1.3584896 |
| PNKP          | 0.159952 | 8.659156 | 3.915088 | 0.0013544 | 0.0389669 | -1.0207543 |
| RBBP7         | 0.159227 | 8.381073 | 3.985653 | 0.0011722 | 0.0359229 | -0.8810806 |
| ZBTB8B        | 0.159184 | 7.919013 | 3.759053 | 0.0018658 | 0.0453377 | -1.3299911 |
| EID2          | 0.157595 | 8.482277 | 4.238763 | 0.0007    | 0.027666  | -0.3818309 |
| ALOXE3        | 0.156637 | 7.650103 | 3.818682 | 0.0016507 | 0.042383  | -1.2117749 |
| SPATA7        | 0.15609  | 7.817523 | 4.158273 | 0.0008243 | 0.0303104 | -0.5402321 |
| ZFP810        | 0.154599 | 8.241748 | 3.876874 | 0.0014648 | 0.0401833 | -1.0964507 |
| TIMM50        | 0.153621 | 8.208673 | 3.685259 | 0.0021718 | 4.94E-02  | -1.4763054 |
| BMP1          | 0.15326  | 8.137301 | 3.985514 | 0.0011726 | 0.0359229 | -0.881356  |
| CORO1A        | 0.152183 | 10.06149 | 3.681304 | 0.0021895 | 4.94E-02  | -1.4841468 |
| TXNIP         | 0.150438 | 7.469305 | 3.77557  | 0.0018036 | 0.0445736 | -1.2972436 |
| LYPD1         | 0.149015 | 10.54637 | 3.680664 | 0.0021924 | 4.94E-02  | -1.4854169 |
| ZFP532        | 0.148163 | 8.803466 | 3.731392 | 0.0019751 | 4.70E-02  | -1.3848362 |
| 2510009E07RIK | 0.142052 | 9.425649 | 3.788069 | 0.0017578 | 4.41E-02  | -1.2724622 |
| THSD4         | 0.139483 | 7.619463 | 3.763974 | 0.0018471 | 0.0452731 | -1.3202345 |
| GSK3A         | 0.137415 | 7.501465 | 3.724974 | 0.0020013 | 4.71E-02  | -1.397562  |
| TMEM175       | -0.15078 | 7.359128 | -3.77833 | 0.0017933 | 0.0445297 | -1.2917663 |
| INSC          | -0.15377 | 7.563494 | -4.19286 | 0.0007683 | 0.0293773 | -0.4721229 |
| LOC545013     | -0.1541  | 7.664849 | -3.71374 | 0.0020481 | 0.047708  | -1.419846  |
| EPHA7         | -0.15803 | 8.387731 | -3.95999 | 0.0012354 | 0.0369329 | -0.931854  |
| ZFP161        | -0.1599  | 7.626112 | -3.84684 | 0.0015579 | 0.0413887 | -1.1559652 |
| PRSS23        | -0.16006 | 7.439347 | -3.86567 | 0.0014989 | 0.0407672 | -1.1186525 |
| PDE7B         | -0.16021 | 7.287927 | -3.70324 | 0.0020928 | 4.83E-02  | -1.440649  |
| PCMTD1        | -0.16174 | 7.853967 | -3.79058 | 0.0017488 | 0.044049  | -1.2674911 |
| CARHSP1       | -0.1618  | 8.668882 | -3.8869  | 0.001435  | 0.0400756 | -1.0765854 |
| PLXNB3        | -0.16524 | 7.579603 | -3.80373 | 0.0017021 | 0.0430762 | -1.2414177 |
| GORASP1       | -0.16946 | 8.485574 | -3.90155 | 0.0013925 | 3.93E-02  | -1.0475718 |
| PTPRT         | -0.16993 | 9.194145 | -3.83697 | 0.0015898 | 4.16E-02  | -1.1755247 |
| DEXI          | -0.16997 | 8.692575 | -3.67354 | 0.0022248 | 0.0498482 | -1.4995489 |
| NCAM2         | -0.1737  | 8.052647 | -4.19448 | 0.0007658 | 0.0293773 | -0.468924  |
| ABHD5         | -0.17443 | 8.313656 | -3.9854  | 0.0011728 | 0.0359229 | -0.8815746 |
| KLHL7         | -0.17612 | 10.11401 | -4.15649 | 0.0008273 | 0.0303135 | -0.5437461 |
| SLC24A2       | -0.17709 | 7.750117 | -4.12253 | 0.0008865 | 0.0309516 | -0.6106896 |
| NOL14         | -0.17766 | 8.148153 | -4.14261 | 0.000851  | 0.0303393 | -0.5711085 |

|               |          |          |          |           |           |            |
|---------------|----------|----------|----------|-----------|-----------|------------|
| DDX6          | -0.17855 | 9.159642 | -4.47611 | 0.0004336 | 0.0212444 | 0.0826576  |
| ZCCHC17       | -0.17996 | 9.246622 | -3.98651 | 0.0011702 | 0.0359229 | -0.8793787 |
| HSD11B1       | -0.18039 | 9.321022 | -4.6483  | 0.0003074 | 0.0161374 | 0.4166542  |
| SNAPC1        | -0.18053 | 7.985758 | -3.99138 | 0.0011586 | 0.0359229 | -0.8697609 |
| CDR2          | -0.18231 | 8.471707 | -3.73173 | 0.0019737 | 0.0469987 | -1.384167  |
| PALM2         | -0.18298 | 8.030058 | -4.47471 | 0.0004348 | 0.0212444 | 0.079915   |
| ABCA5         | -0.18539 | 7.511068 | -3.99251 | 0.0011559 | 3.59E-02  | -0.8675181 |
| CDH2          | -0.18603 | 7.553857 | -4.06686 | 0.000993  | 0.0326457 | -0.7205577 |
| ATP13A2       | -0.18684 | 8.678051 | -4.16913 | 0.0008063 | 0.030066  | -0.5188396 |
| FAM108B       | -0.18868 | 7.79897  | -3.72132 | 0.0020164 | 0.0472876 | -1.4048099 |
| SNX7          | -0.18876 | 8.082012 | -3.76806 | 0.0018316 | 0.045161  | -1.3121269 |
| CRIPT         | -0.1888  | 8.346967 | -4.14343 | 0.0008496 | 0.0303393 | -0.5694897 |
| GRIN1         | -0.18899 | 8.440663 | -4.34779 | 0.0005614 | 0.0242196 | -0.1679474 |
| 2010305A19RIK | -0.18921 | 7.845689 | -4.15452 | 0.0008306 | 0.0303299 | -0.5476289 |
| ACSBG1        | -0.19145 | 8.492413 | -3.93762 | 0.0012933 | 0.0381245 | -0.976148  |
| SKIV2L        | -0.19198 | 9.101456 | -3.71804 | 0.0020301 | 0.0475023 | -1.4113146 |
| GRB14         | -0.19202 | 8.169003 | -4.75789 | 0.0002473 | 0.0138087 | 0.6277181  |
| CAMKK2        | -0.19289 | 9.581449 | -3.99374 | 0.001153  | 0.0359229 | -0.8650885 |
| ZFP36L1       | -0.19308 | 9.402585 | -3.75635 | 0.0018763 | 0.045413  | -1.3353521 |
| LSM12         | -0.19379 | 8.266302 | -4.26495 | 0.0006638 | 0.0269491 | -0.3303878 |
| FIP1L1        | -0.19568 | 7.723884 | -4.37445 | 0.000532  | 0.0236003 | -0.1157659 |
| LITAF         | -0.19712 | 9.402568 | -3.93444 | 0.0013018 | 0.0382663 | -0.9824332 |
| MDGA2         | -0.19745 | 10.00648 | -3.82977 | 0.0016135 | 0.0420422 | -1.1897883 |
| LRRTM3        | -0.19796 | 8.179193 | -4.33257 | 0.0005789 | 0.024635  | -0.1977576 |
| ZFP457        | -0.1983  | 7.854082 | -3.98192 | 0.0011812 | 0.0359229 | -0.8884656 |
| OPN3          | -0.19841 | 7.708122 | -3.90823 | 0.0013736 | 0.0389669 | -1.0343436 |
| ELAVL2        | -0.19852 | 10.69863 | -4.90657 | 0.0001845 | 0.0115755 | 0.9120142  |
| ANKRD35       | -0.19902 | 7.595472 | -3.69857 | 0.0021131 | 0.0485825 | -1.4499206 |
| SLC35F3       | -0.19925 | 10.5571  | -4.11756 | 0.0008955 | 0.0309516 | -0.6204897 |
| CCNL1         | -0.20097 | 8.02895  | -3.90923 | 0.0013708 | 0.0389669 | -1.0323484 |
| ZFP106        | -0.20112 | 7.875586 | -4.44919 | 0.0004577 | 0.0220553 | 0.0301819  |
| OLA1          | -0.20192 | 9.979465 | -4.10954 | 0.0009103 | 0.0311464 | -0.6363145 |
| DCBLD1        | -0.20334 | 8.228777 | -4.21531 | 0.0007341 | 0.028586  | -0.4279476 |
| TLE4          | -0.20583 | 10.51575 | -4.73621 | 0.0002581 | 0.014263  | 0.5860707  |
| DEGS1         | -0.20641 | 11.37378 | -4.10366 | 0.0009212 | 0.0312596 | -0.6479206 |
| 6330503K22RIK | -0.20698 | 9.631736 | -4.10861 | 0.000912  | 0.0311464 | -0.6381608 |
| RGS10         | -0.20761 | 9.908404 | -3.76233 | 0.0018533 | 4.53E-02  | -1.3234896 |
| HR            | -0.20788 | 8.828072 | -4.82941 | 0.0002147 | 0.0126604 | 0.7647834  |
| KLHL5         | -0.20837 | 7.651154 | -4.06204 | 0.0010028 | 0.0328598 | -0.7300883 |
| PPP1R14A      | -0.21035 | 7.848177 | -3.98301 | 0.0011786 | 0.0359229 | -0.8863143 |
| CPLX2         | -0.21041 | 10.7641  | -3.85845 | 0.0015212 | 4.10E-02  | -1.1329571 |
| TCERG1        | -0.2112  | 7.942802 | -4.50636 | 0.0004081 | 0.0202186 | 0.1415186  |
| PLLP          | -0.21199 | 8.43167  | -3.73187 | 0.0019731 | 0.0469987 | -1.3838848 |

|               |          |          |          |           |           |            |
|---------------|----------|----------|----------|-----------|-----------|------------|
| UBE3A         | -0.21244 | 7.899536 | -5.5065  | 5.82E-05  | 0.0055306 | 2.0315367  |
| SEMA3C        | -0.21299 | 7.329269 | -3.7595  | 0.0018641 | 4.53E-02  | -1.329111  |
| EDNRB         | -0.21305 | 9.175007 | -5.38339 | 7.34E-05  | 0.0064327 | 1.8056751  |
| CST3          | -0.21376 | 14.00452 | -3.91124 | 0.0013652 | 3.90E-02  | -1.0283786 |
| TMED9         | -0.21404 | 11.00351 | -4.0922  | 0.000943  | 0.0316926 | -0.6705345 |
| NCAPD2        | -0.2166  | 8.053598 | -3.93165 | 0.0013092 | 0.0382721 | -0.9879491 |
| ARSG          | -0.21759 | 7.788665 | -3.90053 | 0.0013955 | 3.93E-02  | -1.0495911 |
| PEBP1         | -0.21763 | 9.613663 | -3.93957 | 0.0012882 | 0.0380789 | -0.9722879 |
| PIGZ          | -0.21795 | 8.331971 | -4.67011 | 0.0002943 | 0.0156079 | 0.4587523  |
| ANLN          | -0.21797 | 8.280857 | -4.20235 | 0.0007536 | 0.0291328 | -0.4534331 |
| PHTF2         | -0.21948 | 8.132256 | -4.2668  | 0.0006613 | 0.0269491 | -0.3267428 |
| RORA          | -0.2206  | 8.983488 | -3.71272 | 0.0020524 | 0.047708  | -1.4218669 |
| HSPA4         | -0.221   | 7.682145 | -3.93227 | 0.0013076 | 0.0382721 | -0.9867218 |
| FLRT2         | -0.22145 | 9.381509 | -4.24558 | 0.0006904 | 0.0275965 | -0.3684394 |
| CAT           | -0.22329 | 7.897932 | -4.39081 | 0.0005148 | 0.023314  | -0.0837836 |
| GPR17         | -0.22329 | 8.459968 | -4.2224  | 0.0007236 | 0.0284932 | -0.4140063 |
| EVL           | -0.22348 | 10.05722 | -4.28957 | 0.0006315 | 0.0260327 | -0.2820556 |
| PTGES3        | -0.22472 | 9.397217 | -3.8052  | 0.001697  | 0.0430495 | -1.2385031 |
| UCHL5         | -0.22623 | 9.556969 | -3.84285 | 0.0015707 | 0.0413887 | -1.163869  |
| ZFP292        | -0.22676 | 8.929222 | -4.19901 | 0.0007588 | 0.0292243 | -0.4600163 |
| GRIT          | -0.22724 | 9.460596 | -3.87391 | 0.0014738 | 0.0402915 | -1.1023255 |
| MAP3K1        | -0.2288  | 7.624211 | -4.42968 | 0.000476  | 0.0223256 | -0.007861  |
| A530082C11RIK | -0.23068 | 8.569516 | -3.98225 | 0.0011804 | 0.0359229 | -0.8878143 |
| CADPS2        | -0.23087 | 11.12074 | -5.74628 | 3.72E-05  | 0.0040842 | 2.4653149  |
| CNOT4         | -0.2309  | 9.116484 | -6.04804 | 2.14E-05  | 0.0028596 | 2.9993171  |
| ITGB5         | -0.23156 | 8.32545  | -5.00435 | 0.0001524 | 0.0100529 | 1.0975822  |
| CBLN2         | -0.2327  | 8.078496 | -4.75983 | 0.0002464 | 0.0138087 | 0.63145    |
| RHOG          | -0.23305 | 7.999174 | -5.37686 | 7.44E-05  | 0.0064327 | 1.793625   |
| SMEK2         | -0.23563 | 9.418866 | -4.54169 | 0.0003802 | 0.0191068 | 0.2101804  |
| ZMAT3         | -0.23569 | 10.58692 | -4.11647 | 0.0008975 | 0.0309516 | -0.6226369 |
| 9130422G05RIK | -0.23865 | 8.9559   | -5.11274 | 0.0001235 | 0.0088641 | 1.3019502  |
| TJP1          | -0.24025 | 8.397151 | -3.70847 | 0.0020705 | 0.047916  | -1.4302941 |
| PTN           | -0.24175 | 11.83842 | -4.72597 | 0.0002634 | 0.0144044 | 0.5663759  |
| ENPP2         | -0.24341 | 11.01117 | -3.71685 | 0.002035  | 4.75E-02  | -1.413664  |
| RELL1         | -0.24467 | 8.501901 | -3.88545 | 0.0014393 | 0.0400756 | -1.0794592 |
| RAB6B         | -0.24646 | 12.47246 | -4.48288 | 0.0004278 | 0.0210942 | 0.0958291  |
| TYKI          | -0.24703 | 8.792128 | -4.32265 | 0.0005906 | 0.0247346 | -0.2171855 |
| SCD1          | -0.24734 | 10.50984 | -4.82125 | 0.0002182 | 0.0127942 | 0.7491711  |
| 1700023B02RIK | -0.24811 | 8.225738 | -5.22648 | 9.91E-05  | 0.0077505 | 1.5147955  |
| CLCN4-2       | -0.24913 | 8.232154 | -5.03658 | 0.0001431 | 0.0097458 | 1.1585032  |
| LOC100047749  | -0.25012 | 8.076691 | -4.3647  | 0.0005426 | 0.0236603 | -0.1348485 |
| PDCD4         | -0.25095 | 8.358616 | -3.81938 | 0.0016483 | 0.042383  | -1.2103841 |
| SLC7A10       | -0.25199 | 8.636367 | -4.9924  | 0.000156  | 0.0102197 | 1.0749593  |

|               |          |          |          |           |           |            |
|---------------|----------|----------|----------|-----------|-----------|------------|
| ZNRF1         | -0.25362 | 8.790423 | -5.03962 | 0.0001423 | 0.0097458 | 1.1642334  |
| SLC7A14       | -0.25388 | 9.001413 | -4.42283 | 0.0004826 | 0.0224362 | -0.0212428 |
| GPM6B         | -0.2546  | 8.30149  | -3.67438 | 0.002221  | 4.98E-02  | -1.4978764 |
| S100B         | -0.2547  | 7.766454 | -5.21758 | 0.0001009 | 0.0078262 | 1.4982129  |
| ZBTB38        | -0.2594  | 7.687606 | -6.40703 | 1.12E-05  | 0.0020465 | 3.616783   |
| OSBPL6        | -0.25954 | 9.332504 | -5.69973 | 4.05E-05  | 0.0042712 | 2.38176    |
| LOC329575     | -0.26211 | 9.201205 | -3.88912 | 0.0014285 | 0.0400756 | -1.0721931 |
| SEMA3E        | -0.26234 | 8.285762 | -4.44514 | 0.0004614 | 0.0221343 | 0.0222942  |
| FOS           | -0.26245 | 9.766477 | -5.42842 | 6.74E-05  | 0.0061343 | 1.8885193  |
| CTSB          | -0.2632  | 13.04462 | -4.00802 | 0.0011198 | 0.0352762 | -0.8368531 |
| PGM2L1        | -0.26616 | 10.91507 | -3.87754 | 0.0014628 | 0.0401833 | -1.0951398 |
| PBRM1         | -0.26704 | 9.111144 | -4.17748 | 0.0007927 | 0.0298767 | -0.5023952 |
| FGF1          | -0.26717 | 9.163044 | -4.1744  | 0.0007977 | 0.0299573 | -0.5084582 |
| ALDOA         | -0.26736 | 12.53948 | -4.12113 | 0.000889  | 0.0309516 | -0.6134632 |
| SEPP1         | -0.27065 | 8.726684 | -4.04193 | 0.0010449 | 0.0335151 | -0.7698191 |
| INA           | -0.27312 | 10.56001 | -3.98679 | 0.0011695 | 0.0359229 | -0.878831  |
| SLC44A1       | -0.27381 | 8.392265 | -7.14815 | 3.16E-06  | 9.27E-04  | 4.8292086  |
| ABCD2         | -0.27395 | 8.007285 | -6.46451 | 1.02E-05  | 0.0019864 | 3.7138338  |
| ZFP91-CNTF    | -0.27524 | 8.334652 | -5.08117 | 0.0001313 | 0.0092349 | 1.2425765  |
| SULF1         | -0.27566 | 8.768357 | -5.98343 | 2.40E-05  | 0.0030698 | 2.8861218  |
| NR1D2         | -0.27592 | 8.714713 | -3.82294 | 0.0016363 | 0.0422195 | -1.203336  |
| BUD31         | -0.27659 | 9.647988 | -4.39879 | 0.0005065 | 0.023207  | -0.0681896 |
| PCBP2         | -0.27727 | 10.78411 | -3.72701 | 0.0019929 | 0.0470804 | -1.3935164 |
| PPP1R3C       | -0.27743 | 10.51775 | -3.88358 | 0.0014448 | 0.0401236 | -1.0831615 |
| PPM1L         | -0.27804 | 10.43274 | -5.87014 | 2.96E-05  | 0.0035858 | 2.6861407  |
| PTEN          | -0.27819 | 8.296044 | -4.05039 | 0.001027  | 0.033244  | -0.7530953 |
| ATP6V0A2      | -0.2784  | 8.836953 | -5.0625  | 0.0001361 | 0.0095124 | 1.2074032  |
| LOC100045304  | -0.27843 | 8.674278 | -5.00876 | 0.0001511 | 1.00E-02  | 1.1059258  |
| R3HDM1        | -0.27915 | 8.718493 | -5.7642  | 3.59E-05  | 0.0040609 | 2.4974131  |
| NFIC          | -0.27981 | 8.22565  | -7.16545 | 3.07E-06  | 9.26E-04  | 4.8565061  |
| NPY           | -0.28003 | 11.02052 | -5.50928 | 5.79E-05  | 0.0055306 | 2.0366025  |
| ASH1L         | -0.28142 | 7.909971 | -6.57728 | 8.35E-06  | 1.83E-03  | 3.9027389  |
| 2610044O15RII | -0.28231 | 8.103242 | -5.81658 | 3.26E-05  | 0.0038255 | 2.5909303  |
| IMPAD1        | -0.28263 | 8.443051 | -3.90446 | 0.0013842 | 0.0391632 | -1.0417931 |
| ANKRD17       | -0.28295 | 8.146667 | -4.14885 | 0.0008402 | 0.0303393 | -0.5588101 |
| KPNB1         | -0.28297 | 10.22433 | -3.75827 | 0.0018688 | 0.0453377 | -1.3315376 |
| DYNLT3        | -0.28541 | 11.61523 | -3.94478 | 0.0012745 | 0.0378868 | -0.9619694 |
| LOC100046320  | -0.28636 | 9.399475 | -5.03019 | 0.0001449 | 0.0098046 | 1.1464296  |
| NPAS4         | -0.28719 | 8.183955 | -6.05277 | 2.12E-05  | 0.0028596 | 3.0075776  |
| KCNK13        | -0.28941 | 8.208999 | -4.25337 | 0.0006795 | 0.0273142 | -0.3531207 |
| TXNL4         | -0.28956 | 9.157446 | -4.0996  | 0.0009289 | 0.0313176 | -0.655922  |
| SKP1A         | -0.29175 | 11.02576 | -3.97003 | 0.0012103 | 0.0366412 | -0.9119966 |
| EVI2A         | -0.29342 | 8.523316 | -5.37719 | 7.43E-05  | 0.0064327 | 1.7942371  |

|              |          |          |          |           |           |            |
|--------------|----------|----------|----------|-----------|-----------|------------|
| NETO1        | -0.29425 | 8.955297 | -6.0717  | 2.05E-05  | 2.86E-03  | 3.0406205  |
| C1QL3        | -0.29453 | 8.877394 | -4.08154 | 0.0009637 | 0.0320824 | -0.6915718 |
| PMP22        | -0.29505 | 8.672352 | -5.19039 | 0.0001063 | 0.0080687 | 1.4474467  |
| KIF5A        | -0.29787 | 11.55376 | -4.90424 | 0.0001854 | 0.0115755 | 0.9075643  |
| LOC100041703 | -0.29917 | 7.832738 | -3.76254 | 0.0018525 | 0.0452731 | -1.3230743 |
| FAM134A      | -0.29967 | 10.51222 | -3.96796 | 0.0012154 | 0.0366472 | -0.9160946 |
| KCNK2        | -0.29971 | 8.964489 | -4.15825 | 0.0008243 | 0.0303104 | -0.5402781 |
| ANK3         | -0.30099 | 8.759347 | -4.70168 | 0.0002764 | 0.0150371 | 0.519626   |
| TCFE3        | -0.302   | 7.804171 | -7.48071 | 1.83E-06  | 6.54E-04  | 5.3460652  |
| MYO6         | -0.30452 | 10.00877 | -5.91217 | 2.74E-05  | 3.44E-03  | 2.7605502  |
| FAM134B      | -0.30595 | 11.08409 | -4.36908 | 0.0005378 | 0.0236003 | -0.1262777 |
| NDUFB4       | -0.30745 | 9.025854 | -3.82484 | 0.0016299 | 4.22E-02  | -1.1995697 |
| TBC1D19      | -0.31029 | 8.628206 | -4.30807 | 0.0006083 | 0.025274  | -0.2457728 |
| ADAMTS4      | -0.31185 | 7.889195 | -4.94136 | 0.0001724 | 0.0108925 | 0.9781618  |
| PHF14        | -0.31209 | 7.979481 | -5.01883 | 0.0001482 | 0.0099599 | 1.1249725  |
| MYL4         | -0.31315 | 10.89938 | -7.49564 | 1.79E-06  | 6.54E-04  | 5.3688787  |
| ROCK2        | -0.31328 | 8.327694 | -6.42065 | 1.10E-05  | 0.0020465 | 3.6398252  |
| TOMM70A      | -0.31654 | 9.464776 | -3.84224 | 0.0015727 | 0.0413887 | -1.1650828 |
| GPM6A        | -0.31727 | 10.32941 | -5.25406 | 9.40E-05  | 7.52E-03  | 1.5661735  |
| ATAD1        | -0.3178  | 9.886556 | -5.20974 | 0.0001024 | 0.0078871 | 1.4835797  |
| MOG          | -0.32021 | 8.901772 | -7.21139 | 2.85E-06  | 0.0009102 | 4.9287788  |
| HSF2         | -0.32468 | 7.94058  | -4.74618 | 0.0002531 | 0.0140579 | 0.6052271  |
| LASS2        | -0.32604 | 9.522891 | -6.40694 | 1.12E-05  | 2.05E-03  | 3.6166375  |
| SEL1L        | -0.32655 | 8.589124 | -4.07786 | 0.000971  | 0.0321229 | -0.6988466 |
| VCL          | -0.32701 | 9.080144 | -5.44995 | 6.47E-05  | 0.0060197 | 1.9280503  |
| ADSSL1       | -0.32921 | 9.236767 | -8.18694 | 6.03E-07  | 3.79E-04  | 6.3892979  |
| TBL1X        | -0.33069 | 9.068043 | -4.66605 | 0.0002967 | 0.0156554 | 0.4509336  |
| LOC100044177 | -0.33478 | 8.509613 | -6.46461 | 1.02E-05  | 1.99E-03  | 3.7139938  |
| MDH1         | -0.33486 | 8.886961 | -5.19485 | 0.0001054 | 0.0080577 | 1.4557696  |
| IAP          | -0.33699 | 11.19885 | -5.25438 | 9.40E-05  | 0.0075176 | 1.5667574  |
| TMEM184C     | -0.3401  | 8.991811 | -6.10303 | 1.93E-05  | 0.0027964 | 3.0951731  |
| OLIG1        | -0.34093 | 12.08359 | -6.78277 | 5.85E-06  | 1.47E-03  | 4.241981   |
| ADAM9        | -0.34608 | 8.772647 | -6.04701 | 2.14E-05  | 0.0028596 | 2.9975165  |
| GLTP         | -0.34848 | 9.439177 | -6.5152  | 9.30E-06  | 1.92E-03  | 3.7989901  |
| NDUFB2       | -0.34906 | 8.82696  | -5.27951 | 8.96E-05  | 0.0072698 | 1.6134787  |
| ZEB2         | -0.35005 | 9.562137 | -7.84422 | 1.03E-06  | 5.70E-04  | 5.8921339  |
| BZW1         | -0.35249 | 9.998774 | -4.25252 | 0.0006807 | 0.0273142 | -0.354793  |
| MAP2K1       | -0.35345 | 9.565388 | -3.67939 | 0.0021982 | 4.95E-02  | -1.4879367 |
| DLD          | -0.35378 | 9.035528 | -4.14341 | 0.0008496 | 0.0303393 | -0.569521  |
| GSTM5        | -0.3546  | 11.46692 | -5.09206 | 0.0001285 | 0.0091642 | 1.2630662  |
| LOC100048530 | -0.35492 | 8.460216 | -4.76355 | 0.0002446 | 0.013801  | 0.6385839  |
| CNP          | -0.36463 | 9.184679 | -6.21189 | 1.59E-05  | 2.51E-03  | 3.2835701  |
| XLR4A        | -0.36541 | 8.818481 | -7.42552 | 2.00E-06  | 6.82E-04  | 5.2614378  |

|               |          |          |          |           |           |            |
|---------------|----------|----------|----------|-----------|-----------|------------|
| DST           | -0.36941 | 9.687143 | -3.69137 | 0.0021446 | 0.0491095 | -1.4641943 |
| FUT9          | -0.37216 | 7.660745 | -7.61997 | 1.46E-06  | 6.18E-04  | 5.5575823  |
| TRIM59        | -0.37302 | 7.856267 | -7.48695 | 1.81E-06  | 6.54E-04  | 5.3556014  |
| SC4MOL        | -0.37357 | 10.7044  | -7.64124 | 1.42E-06  | 6.18E-04  | 5.5896201  |
| EDG2          | -0.37368 | 8.274282 | -5.76073 | 3.62E-05  | 0.0040609 | 2.4911981  |
| HTR1F         | -0.37436 | 8.201666 | -7.64301 | 1.41E-06  | 6.18E-04  | 5.5922929  |
| SST           | -0.3792  | 12.73845 | -4.37035 | 0.0005364 | 0.0236003 | -0.1237931 |
| SELK          | -0.38075 | 10.29669 | -7.51984 | 1.72E-06  | 6.54E-04  | 5.4057862  |
| SEPT7         | -0.38371 | 8.206913 | -5.15488 | 0.0001138 | 0.0085603 | 1.3810082  |
| SCN1A         | -0.38571 | 10.25208 | -5.85211 | 3.06E-05  | 0.0036646 | 2.6541327  |
| TMEM178       | -0.39797 | 11.20272 | -6.1983  | 1.63E-05  | 0.0025293 | 3.2601447  |
| ARC           | -0.40271 | 10.64455 | -7.89118 | 9.53E-07  | 0.0005587 | 5.9612627  |
| LOC668837     | -0.40361 | 9.740829 | -6.56374 | 8.55E-06  | 1.84E-03  | 3.8801685  |
| STMN1         | -0.4068  | 10.84226 | -3.85967 | 0.0015174 | 0.0410354 | -1.1305346 |
| MOBP          | -0.40846 | 9.052363 | -9.32387 | 1.14E-07  | 1.72E-04  | 7.9216387  |
| GLUL          | -0.40974 | 8.428036 | -4.21784 | 0.0007303 | 0.028586  | -0.4229752 |
| PLEKHB1       | -0.41037 | 11.22758 | -4.33829 | 0.0005723 | 0.0245498 | -0.1865439 |
| IL33          | -0.41584 | 8.923349 | -7.62493 | 1.45E-06  | 0.000618  | 5.5650589  |
| ID2           | -0.41817 | 9.266153 | -4.26804 | 0.0006596 | 0.0269491 | -0.3243119 |
| ENPP6         | -0.41951 | 8.235505 | -8.50862 | 3.71E-07  | 3.21E-04  | 6.8407252  |
| DUSP1         | -0.4298  | 10.59118 | -7.62685 | 1.45E-06  | 6.18E-04  | 5.5679467  |
| FA2H          | -0.43244 | 10.11226 | -8.32953 | 4.86E-07  | 3.66E-04  | 6.5911891  |
| OPALIN        | -0.43297 | 8.913391 | -5.53366 | 5.53E-05  | 0.0054007 | 2.081085   |
| MEGF9         | -0.43593 | 9.484822 | -8.46627 | 3.95E-07  | 3.21E-04  | 6.7821216  |
| QDPR          | -0.43797 | 9.731883 | -6.93256 | 4.54E-06  | 0.0011971 | 4.4851774  |
| KCNA1         | -0.44247 | 9.983153 | -8.17899 | 6.10E-07  | 3.79E-04  | 6.3779502  |
| TRF           | -0.44854 | 10.38794 | -6.29694 | 1.37E-05  | 2.29E-03  | 3.429505   |
| 2510003E04RIK | -0.46587 | 9.671275 | -4.05067 | 0.0010264 | 0.033244  | -0.7525349 |
| NDRG1         | -0.46847 | 8.982476 | -4.86861 | 0.0001988 | 0.0120575 | 0.8396589  |
| A030009H04RII | -0.46939 | 9.0145   | -4.08391 | 0.0009591 | 0.0320824 | -0.6868901 |
| PLP1          | -0.48567 | 13.35939 | -6.41866 | 1.10E-05  | 2.05E-03  | 3.6364611  |
| TSPAN2        | -0.48869 | 9.588803 | -9.03785 | 1.71E-07  | 2.01E-04  | 7.5524577  |
| PGRMC1        | -0.48921 | 10.40578 | -5.04385 | 0.0001411 | 0.0097346 | 1.1722221  |
| PRR18         | -0.49336 | 10.29879 | -6.72115 | 6.51E-06  | 1.55E-03  | 4.1409339  |
| CLDN11        | -0.49684 | 12.82258 | -9.21003 | 1.34E-07  | 0.0001771 | 7.7759682  |
| MBP           | -0.49737 | 12.4868  | -11.6569 | 5.75E-09  | 2.02E-05  | 10.56913   |
| SCN4B         | -0.49789 | 9.653842 | -8.54697 | 3.51E-07  | 3.21E-04  | 6.8935855  |
| MAG           | -0.50234 | 11.07011 | -6.33115 | 1.29E-05  | 2.26E-03  | 3.4879113  |
| MAP1LC3B      | -0.51673 | 9.973792 | -4.14895 | 0.0008401 | 0.0303393 | -0.5585962 |
| UGT8A         | -0.52601 | 9.291783 | -11.2144 | 9.75E-09  | 2.57E-05  | 10.112992  |
| GJC2          | -0.52934 | 8.416071 | -7.6904  | 1.31E-06  | 6.18E-04  | 5.6634441  |
| JAK1          | -0.54443 | 8.622206 | -6.71242 | 6.61E-06  | 1.55E-03  | 4.1265677  |
| SPARCL1       | -0.55035 | 10.72649 | -4.32547 | 0.0005873 | 0.0246919 | -0.2116571 |



|        |          |          |          |          |           |           |
|--------|----------|----------|----------|----------|-----------|-----------|
| MAL    | -0.64099 | 10.16366 | -11.8869 | 4.39E-09 | 2.02E-05  | 10.798476 |
| BCAS1  | -0.69346 | 12.16648 | -9.93673 | 4.96E-08 | 1.05E-04  | 8.6778423 |
| NEFM   | -0.69662 | 10.04288 | -5.42959 | 6.73E-05 | 0.0061343 | 1.8906705 |
| LPGAT1 | -0.70101 | 8.435119 | -9.42478 | 9.94E-08 | 1.72E-04  | 8.0493752 |

**DEGs in resilient left mPFC**

adj.P.Value &lt; 0.05

DEGup 207

DEGdown 187

| Gene        | logFC      | AveExpr    | t          | P.Value    | adj.P.Val  | B          |
|-------------|------------|------------|------------|------------|------------|------------|
| GBP2        | 0.72731639 | 7.66056502 | 16.2623439 | 5.29E-11   | 5.58E-07   | 1.39E+01   |
| CTGF        | 0.71655944 | 10.5568533 | 13.7035409 | 6.06E-10   | 3.20E-06   | 1.21E+01   |
| HBA-A1      | 0.65360581 | 12.603948  | 8.74652926 | 2.61E-07   | 3.45E-04   | 7.07E+00   |
| COL6A1      | 0.54431168 | 9.22545339 | 10.9700686 | 1.32E-08   | 3.47E-05   | 9.66E+00   |
| RGS9        | 0.53004388 | 8.98084078 | 8.37394695 | 4.54E-07   | 4.79E-04   | 6.57374009 |
| SLA         | 0.5244151  | 8.89092299 | 7.99390871 | 8.12E-07   | 6.59E-04   | 6.05E+00   |
| IFITM3      | 0.4813154  | 8.69001105 | 9.09923747 | 1.57E-07   | 0.00033148 | 7.5228103  |
| CMTM5       | 0.4248932  | 9.72152111 | 5.20476514 | 0.00010338 | 1.11E-02   | 1.50576151 |
| RPRM        | 0.41761493 | 11.0341216 | 4.33000093 | 0.00058194 | 0.02624452 | -0.1479201 |
| IIGP2       | 0.41663311 | 7.65321297 | 8.11615961 | 6.72E-07   | 5.91E-04   | 6.22E+00   |
| AHI1        | 0.41227444 | 10.5770826 | 6.24532814 | 1.50E-05   | 4.53E-03   | 3.34E+00   |
| SEZ6        | 0.4043393  | 9.33471543 | 4.52843242 | 0.00039044 | 0.02239287 | 0.23430928 |
| IGTP        | 0.39408004 | 7.65657693 | 8.56641087 | 3.41E-07   | 3.99E-04   | 6.83E+00   |
| PTPRU       | 0.38374163 | 8.32085233 | 4.63031509 | 0.00031857 | 0.0195456  | 0.42914405 |
| NTSR1       | 0.37083086 | 8.08729358 | 5.39818881 | 7.14E-05   | 9.30E-03   | 1.85873991 |
| COL5A1      | 0.36728953 | 8.05294259 | 8.76330913 | 2.55E-07   | 3.45E-04   | 7.09E+00   |
| PEA15       | 0.36580947 | 11.0826732 | 4.25962229 | 0.00067099 | 2.79E-02   | -0.2842629 |
| GRP         | 0.3632124  | 8.92596053 | 4.62239903 | 0.00032363 | 0.01963387 | 0.41404314 |
| SAMD14      | 0.35427398 | 9.19400368 | 5.46122427 | 6.34E-05   | 0.00868457 | 1.97264348 |
| LYZ         | 0.35174883 | 8.30875705 | 6.8752732  | 5.00E-06   | 2.42E-03   | 4.3699962  |
| COTL1       | 0.35053458 | 9.64508114 | 6.44313398 | 1.06E-05   | 4.29E-03   | 3.67E+00   |
| FXYP6       | 0.34990777 | 12.8022387 | 6.02435375 | 2.23E-05   | 5.23E-03   | 2.96427826 |
| 6330503C03I | 0.34432699 | 10.5691509 | 3.96184233 | 0.00123074 | 0.03971879 | -0.8646061 |
| SPSB1       | 0.34340759 | 9.26422672 | 5.37862353 | 7.41E-05   | 9.49E-03   | 1.82327143 |
| ADRA2A      | 0.34288886 | 8.96545121 | 5.87674504 | 2.92E-05   | 5.60E-03   | 2.70896103 |
| CASC3       | 0.34170751 | 10.0445341 | 4.43596882 | 0.00047002 | 0.02455524 | 0.05662849 |
| PLOD3       | 0.34132678 | 9.05859914 | 5.31193765 | 8.42E-05   | 1.02E-02   | 1.70197863 |
| DPYSL5      | 0.33934644 | 7.95106553 | 6.39517027 | 1.15E-05   | 4.37E-03   | 3.59E+00   |
| LY6A        | 0.33164142 | 9.56547165 | 6.39004267 | 1.16E-05   | 4.37E-03   | 3.5822898  |
| ERP29       | 0.32847867 | 11.3256306 | 5.29427462 | 8.71E-05   | 1.03E-02   | 1.67E+00   |
| HAP1        | 0.32591353 | 9.71813153 | 5.80832411 | 3.31E-05   | 0.00602717 | 2.58948742 |
| PRMT2       | 0.32489834 | 11.1476029 | 6.26640409 | 1.44E-05   | 4.53E-03   | 3.38E+00   |
| FAM171A2    | 0.32398854 | 10.388839  | 5.35986453 | 7.68E-05   | 0.00965003 | 1.78921407 |
| HIST1H2AO   | 0.3238989  | 10.2416106 | 6.2569516  | 1.47E-05   | 4.53E-03   | 3.36E+00   |
| PDE2A       | 0.32251091 | 9.81830252 | 4.71045772 | 0.00027166 | 0.01837739 | 0.58165689 |
| CDKN1C      | 0.32085638 | 8.44760745 | 6.44256475 | 1.06E-05   | 4.29E-03   | 3.67E+00   |
| RAMP3       | 0.31961971 | 8.3924463  | 6.87024045 | 5.04E-06   | 2.42E-03   | 4.36E+00   |

|             |            |            |            |            |            |            |
|-------------|------------|------------|------------|------------|------------|------------|
| RAI14       | 0.31790188 | 8.74760376 | 6.18530823 | 1.67E-05   | 0.00452793 | 3.23885429 |
| CDH13       | 0.31748061 | 8.43969677 | 7.16979108 | 3.05E-06   | 2.01E-03   | 4.83E+00   |
| SYT5        | 0.31424091 | 10.3186048 | 5.72344439 | 3.88E-05   | 0.00668212 | 2.44029267 |
| S100A8      | 0.31320713 | 7.55956522 | 7.01641868 | 3.94E-06   | 2.21E-03   | 4.59E+00   |
| FAM148C     | 0.31249882 | 8.86243934 | 4.7217542  | 0.00026565 | 0.0182038  | 0.60309902 |
| CBLN1       | 0.31203372 | 8.54147333 | 5.58480611 | 5.02E-05   | 7.72E-03   | 2.19429658 |
| ARL2        | 0.31202058 | 9.19495199 | 5.01860138 | 0.00014824 | 1.35E-02   | 1.16128428 |
| GNG7        | 0.31109509 | 10.2406808 | 4.17226017 | 0.00080117 | 3.03E-02   | -0.4539944 |
| KCTD10      | 0.31055034 | 9.086462   | 4.88256447 | 0.00019343 | 0.01588044 | 0.90678009 |
| MFGE8       | 0.30838402 | 11.4243492 | 5.42156782 | 6.83E-05   | 0.00912512 | 1.9010511  |
| MAP3K3      | 0.308255   | 8.55540534 | 5.53565999 | 5.51E-05   | 7.75E-03   | 2.10641445 |
| RLBP1       | 0.30478053 | 7.80043288 | 5.73047099 | 3.83E-05   | 6.68E-03   | 2.4526845  |
| DLG4        | 0.30397391 | 9.49692496 | 4.65678191 | 0.00030222 | 0.01899364 | 0.47958585 |
| XRCC1       | 0.29993652 | 8.46453332 | 6.3434893  | 1.26E-05   | 4.53E-03   | 3.50477363 |
| FEZF2       | 0.29985094 | 9.72472105 | 4.1798653  | 0.00078888 | 3.03E-02   | -0.4391989 |
| METTL3      | 0.2994042  | 9.36895529 | 6.15230395 | 1.77E-05   | 4.67E-03   | 3.18E+00   |
| FDPS        | 0.29729403 | 10.8318761 | 4.48655791 | 0.00042461 | 0.02383487 | 0.15393914 |
| SEMA4A      | 0.29689014 | 10.2925298 | 5.0254238  | 0.00014629 | 0.01345885 | 1.17398752 |
| SCAMP2      | 0.29686507 | 8.77843666 | 4.71210726 | 0.00027078 | 0.01837739 | 0.5847888  |
| STATIP1     | 0.29603642 | 10.5913701 | 4.31141254 | 0.00060422 | 0.02679127 | -0.1838947 |
| NRBP2       | 0.2921339  | 10.2750614 | 4.24911893 | 0.00068543 | 0.02823293 | -0.3046419 |
| 5430437P03I | 0.29176821 | 9.35244513 | 6.24141925 | 1.51E-05   | 4.53E-03   | 3.33362983 |
| DDR1        | 0.28913609 | 8.7460174  | 5.11866308 | 0.00012207 | 1.22E-02   | 1.35E+00   |
| ASAH3L      | 0.28720016 | 7.96930731 | 4.2967786  | 0.00062237 | 0.0268076  | -0.2122347 |
| LOC1000475  | 0.28573189 | 9.87488445 | 4.64019596 | 0.00031236 | 1.94E-02   | 0.44798403 |
| DGKG        | 0.28495    | 10.633969  | 4.85520124 | 0.00020412 | 0.01619583 | 0.85531698 |
| ACTR1A      | 0.28491105 | 10.8298495 | 6.09442808 | 1.96E-05   | 5.06E-03   | 3.08431274 |
| HNRNPK      | 0.28472949 | 8.5206578  | 5.33490194 | 8.06E-05   | 1.00E-02   | 1.74381762 |
| ICAM5       | 0.2845324  | 9.42969298 | 5.09615536 | 0.00012751 | 1.23E-02   | 1.30533871 |
| ZER1        | 0.28418472 | 12.3539291 | 4.19360008 | 0.00076717 | 0.0298743  | -0.4124876 |
| DBI         | 0.28305936 | 11.2517493 | 4.67304709 | 0.00029261 | 0.01882851 | 0.51054848 |
| GH          | 0.28248431 | 7.23640633 | 6.30058769 | 1.36E-05   | 4.53E-03   | 3.43E+00   |
| PADI6       | 0.28131167 | 7.45104214 | 5.24940419 | 9.49E-05   | 1.05E-02   | 1.58767932 |
| PDE1B       | 0.280005   | 10.8763249 | 5.65666533 | 4.39E-05   | 0.00712685 | 2.32215671 |
| ANLN        | 0.27997655 | 8.2808568  | 4.92747592 | 0.00017712 | 1.52E-02   | 0.99105296 |
| PPP1R1B     | 0.2799175  | 8.97316049 | 5.18847032 | 0.00010667 | 1.11E-02   | 1.47579171 |
| ALDH4A1     | 0.27872472 | 9.81668194 | 5.57462351 | 5.12E-05   | 7.72E-03   | 2.17611719 |
| ZMYM3       | 0.27796566 | 10.5506796 | 4.78169359 | 0.00023594 | 1.72E-02   | 0.71663573 |
| LMAN2L      | 0.27722551 | 9.21099533 | 5.07153165 | 0.00013374 | 0.01271534 | 1.25968445 |
| MED30       | 0.2766862  | 10.0565877 | 5.40844691 | 7.00E-05   | 9.24E-03   | 1.88E+00   |
| FANCD2      | 0.27579874 | 8.1102285  | 5.89584134 | 2.82E-05   | 5.60E-03   | 2.74E+00   |
| HSF1        | 0.27571457 | 9.89883323 | 5.04389686 | 0.00014112 | 0.01329695 | 1.20835447 |
| CACNA1H     | 0.2745926  | 9.67764093 | 4.41414228 | 0.00049112 | 0.02478703 | 0.01457406 |

|             |            |            |            |            |            |            |
|-------------|------------|------------|------------|------------|------------|------------|
| HIST1H2AH   | 0.27445863 | 7.87564113 | 5.88640142 | 2.87E-05   | 5.60E-03   | 2.72576536 |
| RPRML       | 0.27207069 | 10.6658441 | 4.50295216 | 0.00041088 | 0.0234381  | 0.18542432 |
| C4B         | 0.27164169 | 7.49978945 | 5.57412841 | 5.12E-05   | 0.00772225 | 2.17523288 |
| AMIGO2      | 0.2695825  | 8.55137098 | 3.98928478 | 0.00116354 | 0.03833166 | -0.8109363 |
| 1700027N10  | 0.26530942 | 8.01199439 | 5.03903271 | 0.00014246 | 1.33E-02   | 1.19930951 |
| TXNDC5      | 0.26514533 | 8.78931254 | 3.94988925 | 0.00126123 | 4.02E-02   | -0.8879919 |
| LOR         | 0.26500952 | 9.26875914 | 5.9917608  | 2.37E-05   | 5.31E-03   | 2.91E+00   |
| MGP         | 0.26417314 | 8.40579191 | 5.13494365 | 0.00011828 | 1.20E-02   | 1.3770953  |
| RASL10A     | 0.2635879  | 9.58820196 | 4.08002884 | 0.0009667  | 3.45E-02   | -6.34E-01  |
| SLC9A3R2    | 0.26328908 | 8.86538615 | 3.82414574 | 0.00163224 | 4.63E-02   | -1.1342712 |
| LOC1000485  | 0.26237269 | 7.3121917  | 5.92774699 | 2.66E-05   | 5.60E-03   | 2.79755554 |
| LOC1000483  | 0.2617378  | 8.75074611 | 4.75505943 | 0.0002487  | 0.01769331 | 0.6662349  |
| ARPC5       | 0.26006417 | 11.1296861 | 4.42445711 | 0.00048103 | 0.02472631 | 0.03445339 |
| DENND2A     | 0.25974376 | 8.29597454 | 4.53842029 | 0.00038271 | 2.22E-02   | 0.25345461 |
| LASS5       | 0.25890909 | 9.45211093 | 4.53545883 | 0.00038499 | 0.02220081 | 0.24777891 |
| BEX4        | 0.25862425 | 9.10806379 | 5.20204089 | 0.00010392 | 1.11E-02   | 1.50075348 |
| OASL2       | 0.25804734 | 7.46063322 | 4.91998815 | 0.00017974 | 1.52E-02   | 0.97701964 |
| ENSMUSG00   | 0.25748333 | 7.88298176 | 5.54802011 | 5.38E-05   | 7.75E-03   | 2.12854969 |
| WSCD1       | 0.2566169  | 8.90817941 | 4.14180257 | 0.00085238 | 0.03161488 | -0.5132842 |
| SEMA5A      | 0.25644608 | 9.76898032 | 4.69316012 | 0.00028115 | 0.01842835 | 0.54879708 |
| CRMP1       | 0.25628835 | 9.35140786 | 3.84201726 | 0.00157343 | 0.04536723 | -1.0992439 |
| AGPAT4      | 0.25606981 | 9.41941948 | 4.22091109 | 0.00072579 | 0.02926014 | -0.3594099 |
| ZFYVE21     | 0.25581775 | 9.79064244 | 4.57812595 | 0.00035351 | 0.02119653 | 0.32946915 |
| 9030624J02F | 0.25530015 | 9.35710945 | 5.31555444 | 8.36E-05   | 0.0102095  | 1.70857297 |
| ADAM15      | 0.25477133 | 9.51510423 | 4.49065282 | 0.00042114 | 0.02376633 | 0.16180576 |
| CXX1C       | 0.25390587 | 10.4289732 | 4.45696004 | 0.00045061 | 0.0245493  | 0.09703403 |
| WBP5        | 0.2538873  | 10.7542197 | 3.8583403  | 0.00152159 | 4.49E-02   | -1.0672574 |
| ST6GALNAC!  | 0.25166391 | 9.7821164  | 4.39040978 | 0.00051516 | 0.02482434 | -0.031199  |
| HDGF        | 0.25147816 | 10.1173034 | 4.78789929 | 0.00023307 | 0.01708026 | 0.72836751 |
| IGF2        | 0.24960236 | 9.49937059 | 4.04119845 | 0.00104642 | 3.62E-02   | -7.09E-01  |
| DRCTNNB1A   | 0.24683752 | 8.36220791 | 5.27352695 | 9.06E-05   | 0.01039103 | 1.63183471 |
| TSC22D1     | 0.24666292 | 9.09787686 | 4.40536996 | 0.00049987 | 0.02482434 | -0.0023396 |
| IDE         | 0.24563783 | 9.57247495 | 3.86758014 | 0.00149301 | 4.43E-02   | -1.05E+00  |
| AI894139    | 0.2456207  | 8.09544081 | 4.39141607 | 0.00051412 | 0.02482434 | -0.0292572 |
| TRIM41      | 0.24558318 | 9.41411425 | 4.44586106 | 0.00046077 | 0.0245493  | 0.07567472 |
| FA2H        | 0.24544011 | 10.1122559 | 4.31568435 | 0.00059902 | 0.02667296 | -0.175625  |
| SAMD9L      | 0.24458682 | 8.21459994 | 4.26843352 | 0.00065912 | 0.02760212 | -0.2671731 |
| 2610208M17  | 0.2436618  | 9.26142735 | 3.90486782 | 0.0013831  | 4.22E-02   | -0.9761189 |
| NME2        | 0.24255588 | 10.329742  | 4.49910574 | 0.00041406 | 0.02349252 | 0.17803952 |
| MAS1        | 0.24145756 | 8.79785389 | 4.41796645 | 0.00048736 | 0.02472631 | 0.0219453  |
| MORN4       | 0.24093044 | 8.54575067 | 4.25599878 | 0.00067594 | 2.80E-02   | -0.2912925 |
| RFX1        | 0.24085165 | 8.27313652 | 3.95815295 | 0.00124007 | 3.99E-02   | -0.8718236 |
| DRD1A       | 0.23741997 | 8.89829189 | 3.97605026 | 0.00119547 | 3.89E-02   | -0.8368156 |

|            |            |            |            |            |            |            |
|------------|------------|------------|------------|------------|------------|------------|
| ARL6IP1    | 0.23714749 | 12.5945866 | 4.27257859 | 0.00065361 | 0.02760212 | -0.2591354 |
| CYBA       | 0.23700991 | 7.9916332  | 4.67695874 | 0.00029034 | 0.01879736 | 0.51799058 |
| DDAH1      | 0.23680293 | 11.2813149 | 3.79668103 | 0.00172698 | 4.77E-02   | -1.188112  |
| RYR3       | 0.23640937 | 8.07447006 | 4.70549726 | 0.00027435 | 0.01842835 | 0.57223693 |
| JOSD2      | 0.23559235 | 9.28461091 | 3.98657474 | 0.00117001 | 0.03834512 | -0.8162351 |
| G3BP1      | 0.23520052 | 8.93058992 | 3.77446689 | 0.00180765 | 0.04929229 | -1.231668  |
| RPS26      | 0.23514436 | 11.8522756 | 3.88407379 | 0.00144334 | 0.04327156 | -1.0168433 |
| MIDN       | 0.23358263 | 10.1683838 | 4.33784966 | 0.00057279 | 0.02614914 | -0.1327384 |
| HIST1H2AK  | 0.23328321 | 7.99415354 | 4.36045588 | 0.00054724 | 0.02571531 | -0.0890386 |
| LOC1000482 | 0.23296584 | 9.89374789 | 4.3037171  | 0.00061369 | 2.68E-02   | -0.1987957 |
| D12ERTD647 | 0.23192765 | 9.96936057 | 5.27980866 | 8.95E-05   | 1.04E-02   | 1.64331997 |
| SPRED1     | 0.2319093  | 11.6326393 | 4.35731866 | 0.00055071 | 0.02571531 | -0.0951007 |
| ARD1       | 0.23126028 | 8.80531302 | 4.54081213 | 0.00038088 | 0.0221909  | 0.25803802 |
| WFS1       | 0.23021222 | 8.92465889 | 3.80846964 | 0.00168565 | 0.04705997 | -1.1650005 |
| NR2F6      | 0.22953673 | 8.71830637 | 4.45697771 | 0.00045059 | 0.0245493  | 0.09706804 |
| ECE1       | 0.22891649 | 8.70779445 | 3.99443971 | 0.00115134 | 0.0382079  | -0.8008581 |
| GM347      | 0.22710281 | 9.25337727 | 3.83045775 | 0.00161122 | 4.60E-02   | -1.12E+00  |
| ARHGEF15   | 0.22645484 | 8.08675003 | 4.63069484 | 0.00031833 | 0.0195456  | 0.42986831 |
| HIST2H2AC  | 0.22639309 | 10.2980401 | 4.06026944 | 0.00100646 | 3.54E-02   | -0.6722591 |
| ARD1A      | 0.22555531 | 9.6175107  | 4.01197044 | 0.00111081 | 3.80E-02   | -0.7665926 |
| ACVR2B     | 0.22517906 | 8.79906189 | 4.9220095  | 0.00017903 | 0.01517738 | 0.98080865 |
| BAT1A      | 0.22491457 | 10.9653133 | 4.58269953 | 0.0003503  | 0.02112387 | 0.33821507 |
| GAB1       | 0.22481247 | 9.00369265 | 4.80563762 | 0.00022505 | 0.01684358 | 0.76187742 |
| MED6       | 0.22423229 | 8.93803399 | 4.39963273 | 0.00050568 | 0.02482434 | -0.013405  |
| INTS4      | 0.22326807 | 9.30587442 | 3.91209951 | 0.00136275 | 4.19E-02   | -0.9619589 |
| FIGF       | 0.22220842 | 7.85536692 | 4.41929907 | 0.00048605 | 0.02472631 | 0.02451367 |
| ITGB4      | 0.22197859 | 7.81661978 | 4.55483844 | 0.00037035 | 0.02195661 | 0.28490501 |
| ETS2       | 0.22177192 | 10.8329305 | 4.21089503 | 0.00074069 | 2.96E-02   | -0.3788699 |
| H3F3A      | 0.22090498 | 10.167176  | 3.85044786 | 0.00154644 | 0.04510091 | -1.0827226 |
| VPS37C     | 0.21897736 | 7.66261498 | 3.91067489 | 0.00136673 | 0.04192766 | -0.9647482 |
| LOC1000462 | 0.21806354 | 11.8201642 | 4.54244498 | 0.00037964 | 0.0221909  | 0.26116666 |
| THOC4      | 0.21797631 | 9.26818632 | 4.46754232 | 0.00044113 | 0.02445159 | 0.11738874 |
| ARPC4      | 0.2151017  | 9.41185601 | 4.12101962 | 0.00088922 | 0.03247026 | -0.5537724 |
| PSME2      | 0.21486211 | 7.75933121 | 4.18483846 | 0.00078095 | 3.01E-02   | -0.4295258 |
| GNB2       | 0.21413954 | 10.9929425 | 4.14097764 | 0.00085381 | 0.03161488 | -0.5148908 |
| THSD4      | 0.21381142 | 7.619463   | 5.2670094  | 9.17E-05   | 1.04E-02   | 1.62E+00   |
| DDX27      | 0.21358971 | 8.34350716 | 3.80402704 | 0.00170111 | 4.71E-02   | -1.17E+00  |
| MOBP       | 0.21091835 | 9.05236343 | 4.39515786 | 0.00051026 | 0.02482434 | -0.0220376 |
| NPM3-PS1   | 0.21029489 | 9.32619546 | 3.85354186 | 0.00153665 | 0.04504507 | -1.0766598 |
| CELSR3     | 0.20875692 | 10.1994232 | 3.94349839 | 0.00127785 | 0.04049581 | -0.9004975 |
| IFIT3      | 0.2086082  | 7.82613328 | 4.69725417 | 0.00027887 | 0.01842835 | 0.55657736 |
| CEP120     | 0.20776642 | 10.0179769 | 3.89783512 | 0.00140318 | 0.04255109 | -0.9898908 |
| SMPD3      | 0.20699083 | 9.09406722 | 3.92548104 | 0.00132589 | 0.04103248 | -0.9357614 |

|             |            |            |            |            |            |            |
|-------------|------------|------------|------------|------------|------------|------------|
| VPS25       | 0.20635303 | 8.98146554 | 4.44061665 | 0.00046565 | 0.02455524 | 0.06557836 |
| ITFG3       | 0.20490279 | 7.7505897  | 4.30700976 | 0.00060962 | 0.0268076  | -0.1924194 |
| CSRP2       | 0.2039182  | 7.8909085  | 3.81410125 | 0.00166626 | 4.68E-02   | -1.1539605 |
| GBP3        | 0.20378764 | 7.72570631 | 4.19749031 | 0.00076113 | 2.98E-02   | -0.4049242 |
| CACNB3      | 0.20373972 | 8.97196061 | 4.27081993 | 0.00065595 | 2.76E-02   | -0.2625455 |
| ILK         | 0.20313357 | 9.88498295 | 4.28947125 | 0.00063164 | 0.02709631 | -0.2263921 |
| HPCAL4      | 0.20253292 | 13.0954874 | 4.18419107 | 0.00078198 | 0.03011748 | -0.4307849 |
| LMO3        | 0.20112918 | 8.37342408 | 3.95701794 | 0.00124296 | 0.03986912 | -0.8740442 |
| APBA3       | 0.19963427 | 8.35894646 | 4.14288152 | 0.00085051 | 0.03161488 | -0.5111829 |
| NUMA1       | 0.1984612  | 7.73571399 | 3.87619776 | 0.00146685 | 4.37E-02   | -1.0322713 |
| UBE2L3      | 0.19803463 | 11.2301617 | 3.81469845 | 0.00166422 | 4.68E-02   | -1.15E+00  |
| SF3B2       | 0.19654197 | 11.1736923 | 3.97525306 | 0.00119743 | 0.03888136 | -0.8383747 |
| ATG16L1     | 0.19380728 | 10.1351094 | 4.73790001 | 0.00025729 | 0.01793268 | 0.63372152 |
| SDK1        | 0.19378217 | 7.8105597  | 3.92029517 | 0.00134005 | 4.13E-02   | -0.9459133 |
| UPF3A       | 0.19262864 | 7.99018957 | 3.83745855 | 0.00158822 | 0.0454215  | -1.1081781 |
| CBFA2T3H    | 0.19250204 | 8.34434919 | 3.81015917 | 0.00167981 | 0.04702132 | -1.1616884 |
| SGK1        | 0.19211816 | 11.4479198 | 3.94185587 | 0.00128215 | 0.0405106  | -0.9037118 |
| D430041B17  | 0.19081431 | 9.12323543 | 3.7808291  | 0.00178416 | 4.88E-02   | -1.2191928 |
| FBXO21      | 0.18998335 | 10.6295379 | 3.89938568 | 0.00139873 | 4.25E-02   | -0.9868543 |
| CD74        | 0.18962902 | 7.23198446 | 4.06780335 | 0.00099111 | 0.03521608 | -0.6575545 |
| MAPK1       | 0.18713731 | 11.321404  | 4.05455438 | 0.00101827 | 0.03558222 | -0.6834155 |
| RBBP7       | 0.18646251 | 8.38107256 | 4.26072321 | 0.0006695  | 0.02787798 | -0.2821273 |
| S100A11     | 0.18417631 | 7.93686446 | 3.84966637 | 0.00154892 | 4.51E-02   | -1.084254  |
| SLC2A3      | 0.18320907 | 11.3323739 | 4.17051557 | 0.00080402 | 0.03030283 | -0.457389  |
| SCRIB       | 0.18125157 | 8.24136484 | 4.1230547  | 0.00088554 | 0.03244824 | -0.5498067 |
| SLC9A1      | 0.18057772 | 9.01189405 | 4.39829426 | 0.00050705 | 0.02482434 | -0.0159869 |
| ANXA2       | 0.18054056 | 8.25869956 | 3.9837975  | 0.00117668 | 0.03844418 | -0.8216655 |
| CTXN1       | 0.17825284 | 10.2981216 | 3.77223069 | 0.00181598 | 4.94E-02   | -1.24E+00  |
| IRF1        | 0.17772877 | 7.6511468  | 4.16153415 | 0.00081884 | 3.06E-02   | -0.4748676 |
| JOSD1       | 0.17738489 | 10.9458483 | 3.94848681 | 0.00126486 | 0.04020499 | -0.890736  |
| COX4NB      | 0.17709742 | 7.93215351 | 3.90471743 | 0.00138352 | 4.22E-02   | -0.9764134 |
| FXYD5       | 0.17637022 | 7.82641592 | 3.76310374 | 0.00185037 | 0.04994117 | -1.2539504 |
| TPST1       | 0.17621868 | 9.57839146 | 4.11094411 | 0.00090766 | 3.28E-02   | -0.5734099 |
| 1600014C10I | 0.17533789 | 8.80837478 | 3.75899847 | 0.00186606 | 5.00E-02   | -1.2620009 |
| MUM1        | 0.17519167 | 9.76793586 | 3.88670774 | 0.00143557 | 0.04316106 | -1.0116841 |
| ST5         | 0.1749312  | 8.93081243 | 3.99866623 | 0.00114143 | 0.0382079  | -0.7925957 |
| UACA        | 0.17410982 | 7.96792062 | 3.8057603  | 0.00169506 | 4.71E-02   | -1.170312  |
| ALOXE3      | 0.17248358 | 7.65010303 | 3.83863355 | 0.0015844  | 0.0454215  | -1.1058753 |
| LOC1000480  | 0.17199985 | 8.84783397 | 3.82899514 | 0.00161607 | 4.60E-02   | -1.12E+00  |
| DUS4L       | 0.16522382 | 8.41962591 | 3.80532819 | 0.00169656 | 4.71E-02   | -1.1711591 |
| 5133400G04  | 0.15824766 | 7.86018462 | 3.75996113 | 0.00186237 | 5.00E-02   | -1.2601131 |
| CDH8        | -0.1547624 | 8.21145266 | -3.8480973 | 0.00155391 | 0.04510091 | -1.0873289 |
| D11WSU47E   | -0.1697061 | 8.09100643 | -3.8555044 | 0.00153047 | 4.50E-02   | -1.0728142 |

|             |            |            |            |            |            |            |
|-------------|------------|------------|------------|------------|------------|------------|
| 9130213B05I | -0.1721488 | 9.48811239 | -4.0007711 | 0.00113653 | 3.82E-02   | -0.7884812 |
| PALM2       | -0.1742581 | 8.03005812 | -3.8901694 | 0.00142541 | 0.04297819 | -1.0049039 |
| ZFP161      | -0.1756964 | 7.62611164 | -3.8586357 | 0.00152067 | 4.49E-02   | -1.0666786 |
| 6330406I15R | -0.1792514 | 8.81559798 | -3.9985133 | 0.00114179 | 0.0382079  | -0.7928946 |
| FIP1L1      | -0.1846194 | 7.72388406 | -3.767689  | 0.00183301 | 0.04970301 | -1.2449589 |
| NFIC        | -0.1850112 | 8.22564978 | -4.3249625 | 0.00058789 | 0.02638208 | -0.1576685 |
| 1110032E23F | -0.1897337 | 7.82790267 | -3.8475547 | 0.00155565 | 4.51E-02   | -1.09E+00  |
| FKBP7       | -0.18996   | 7.41293178 | -4.1732535 | 0.00079955 | 3.03E-02   | -0.4520618 |
| ZBTB38      | -0.1910065 | 7.68760601 | -4.306686  | 0.00061002 | 0.0268076  | -0.1930463 |
| DIAP3       | -0.1927974 | 7.76091449 | -3.933452  | 0.00130441 | 0.04067682 | -0.9201592 |
| SLMAP       | -0.1963016 | 8.9465056  | -3.8404783 | 0.00157841 | 4.54E-02   | -1.10E+00  |
| ZCCHC17     | -0.1982558 | 9.24662207 | -4.0090809 | 0.00111739 | 3.80E-02   | -0.7722397 |
| PLXDC1      | -0.1987521 | 8.81422529 | -3.9326019 | 0.00130668 | 4.07E-02   | -9.22E-01  |
| DDIT4L      | -0.199271  | 8.77633627 | -4.1740494 | 0.00079826 | 0.03030283 | -0.4505132 |
| KLHL7       | -0.1995562 | 10.1140051 | -4.2991862 | 0.00061935 | 0.0268076  | -0.207571  |
| SLC39A12    | -0.2008061 | 9.77355053 | -4.0114508 | 0.00111199 | 3.80E-02   | -0.7676082 |
| ASH1L       | -0.2013968 | 7.909971   | -4.2968205 | 0.00062232 | 0.0268076  | -0.2121536 |
| VAMP1       | -0.2025936 | 7.90248061 | -4.4435318 | 0.00046293 | 0.0245493  | 0.07119077 |
| HR          | -0.2060784 | 8.82807208 | -4.3704457 | 0.00053632 | 0.02549451 | -0.0697405 |
| PREI4       | -0.2064273 | 9.13433251 | -4.0620283 | 0.00100286 | 0.03536492 | -0.6688258 |
| TMEM136     | -0.2084623 | 8.29878741 | -3.7936607 | 0.00173773 | 4.77E-02   | -1.19E+00  |
| TMEM218     | -0.2089637 | 8.53966465 | -4.0871128 | 0.00095283 | 0.03408558 | -0.61988   |
| CCNC        | -0.2092644 | 8.18052726 | -4.3232016 | 0.00058999 | 2.64E-02   | -0.1610759 |
| CRIP1       | -0.2096734 | 8.34696681 | -4.2005422 | 0.00075643 | 0.0298302  | -0.3989913 |
| 5730472N09  | -0.2115982 | 10.1393743 | -4.8074731 | 0.00022424 | 1.68E-02   | 0.76534275 |
| LOC1000441  | -0.2151606 | 8.50961321 | -3.7927929 | 0.00174083 | 4.77E-02   | -1.1957351 |
| GRAMD4      | -0.2157626 | 8.01404579 | -4.0138305 | 0.00110659 | 3.80E-02   | -0.7629577 |
| CLCN4-2     | -0.2163337 | 8.23215412 | -3.9925031 | 0.00115591 | 3.82E-02   | -0.8046441 |
| LOC545013   | -0.2167426 | 7.66484905 | -4.7684319 | 0.00024221 | 0.01750681 | 0.69155002 |
| MRPS18C     | -0.2168136 | 10.4520367 | -3.7666743 | 0.00183684 | 0.04970301 | -1.2469487 |
| 4931406C07I | -0.2178242 | 8.32967179 | -4.0008093 | 0.00113644 | 0.0382079  | -0.7884065 |
| ITGB5       | -0.2178824 | 8.32544989 | -4.2985707 | 0.00062012 | 2.68E-02   | -0.2087633 |
| NRN1        | -0.2182582 | 12.5845376 | -4.1108798 | 0.00090778 | 3.28E-02   | -0.5735353 |
| CCNE1       | -0.2189054 | 7.45288275 | -4.7527879 | 0.00024982 | 0.01769331 | 0.66193274 |
| MAGOHB      | -0.2191514 | 7.76901814 | -4.0097804 | 0.00111579 | 0.03803807 | -0.7708725 |
| NAT5        | -0.219714  | 9.48699766 | -3.8713643 | 0.00148146 | 0.04403915 | -1.0417402 |
| UBE3A       | -0.2202259 | 7.89953635 | -5.2109248 | 0.00010216 | 1.11E-02   | 1.51708115 |
| GABRG2      | -0.2217854 | 9.85545614 | -4.9340077 | 0.00017487 | 0.01517738 | 1.00328895 |
| SNX7        | -0.2219048 | 8.08201153 | -4.0437518 | 0.00104098 | 0.03613636 | -0.7045076 |
| 2610044O15  | -0.2219845 | 8.10324211 | -4.1752049 | 0.00079639 | 0.03030283 | -0.4482651 |
| RG9MTD1     | -0.2222002 | 8.48755627 | -4.6621049 | 0.00029904 | 0.01899364 | 0.48972185 |
| STARD8      | -0.2254364 | 8.98805521 | -5.0063512 | 0.00015182 | 0.01369401 | 1.13845986 |
| RAB10       | -0.2281382 | 8.5178054  | -4.3360527 | 0.00057487 | 0.02614914 | -0.1362138 |

|             |            |            |            |            |            |            |
|-------------|------------|------------|------------|------------|------------|------------|
| OSBPL6      | -0.2315367 | 9.33250385 | -4.641749  | 0.0003114  | 0.01939031 | 0.45094431 |
| HAPLN4      | -0.2329205 | 9.55044711 | -4.2759869 | 0.00064912 | 0.02760212 | -0.2525274 |
| SPAG9       | -0.2337413 | 9.15645284 | -4.269354  | 0.0006579  | 0.02760212 | -0.265388  |
| ZFP367      | -0.233966  | 7.81244926 | -4.2295991 | 0.00071311 | 0.02916823 | -0.3425355 |
| 2310047O13  | -0.2357469 | 7.66377073 | -4.4105579 | 0.00049468 | 0.02478703 | 0.00766389 |
| NTNG1       | -0.2381477 | 8.58345708 | -4.5584897 | 0.00036765 | 0.02192008 | 0.29189573 |
| SELK        | -0.2409211 | 10.2966912 | -4.3436195 | 0.00056615 | 0.02597654 | -0.121581  |
| CAMK2G      | -0.241596  | 10.0675616 | -4.2204658 | 0.00072644 | 0.02926014 | -0.3602748 |
| EGR2        | -0.2422923 | 8.30567915 | -5.6566048 | 4.39E-05   | 7.13E-03   | 2.32E+00   |
| GRIN1       | -0.2429456 | 8.44066288 | -5.1019948 | 0.00012607 | 0.0123188  | 1.31615397 |
| ARCN1       | -0.2464699 | 7.92460342 | -4.465941  | 0.00044255 | 0.02445159 | 0.11430923 |
| GADD45G     | -0.248077  | 8.98114632 | -4.3544577 | 0.0005539  | 0.02575027 | -0.1006297 |
| SKIV2L      | -0.2486019 | 9.10145632 | -4.3950167 | 0.0005104  | 0.02482434 | -0.0223099 |
| SLITRK3     | -0.2486429 | 8.17547314 | -5.0825063 | 0.00013093 | 1.26E-02   | 1.28004193 |
| GRIA3       | -0.2486916 | 8.8106862  | -4.4264518 | 0.00047911 | 0.02472631 | 0.03829661 |
| PDHB        | -0.2489454 | 9.28756032 | -4.1981444 | 0.00076012 | 0.0298302  | -0.4036525 |
| SCAMP3      | -0.2495979 | 7.88973311 | -4.221437  | 0.00072501 | 0.02926014 | -0.3583882 |
| PTN         | -0.2511145 | 11.8384157 | -4.4813704 | 0.00042906 | 0.02395679 | 0.14397133 |
| ARNTL       | -0.2515586 | 8.82486104 | -3.9367048 | 0.00129575 | 4.07E-02   | -0.9137927 |
| SLC24A3     | -0.2523753 | 11.6875339 | -3.8448497 | 0.00156431 | 0.04522778 | -1.093693  |
| STMN3       | -0.2537282 | 11.1287635 | -3.8195019 | 0.00164788 | 0.04649757 | -1.143374  |
| EIF3A       | -0.2540049 | 9.90564264 | -3.9882671 | 0.00116597 | 0.03833166 | -0.812926  |
| BMPER       | -0.2550192 | 8.15340116 | -4.8297755 | 0.00021459 | 0.01652986 | 0.8074189  |
| 1110008P14I | -0.2552825 | 12.1151011 | -4.4546481 | 0.0004527  | 0.0245493  | 0.09258578 |
| 5730469M1C  | -0.2562916 | 9.36508929 | -4.3582525 | 0.00054967 | 0.02571531 | -0.0932961 |
| GPM6A       | -0.2576491 | 10.3294071 | -3.8949656 | 0.00141146 | 0.04267953 | -0.9955105 |
| LOC1000463  | -0.2579211 | 9.39947452 | -4.1358872 | 0.0008627  | 0.03177215 | -0.5248057 |
| ABHD12      | -0.2581881 | 9.44510909 | -4.9935359 | 0.00015567 | 1.39E-02   | 1.11E+00   |
| TYROBP      | -0.2600813 | 7.65398959 | -4.7314549 | 0.00026059 | 0.01797398 | 0.62150108 |
| TBC1D23     | -0.2607308 | 8.74207067 | -4.1351042 | 0.00086408 | 0.03177215 | -0.5263308 |
| EPDR1       | -0.2610968 | 11.3240985 | -4.8450655 | 0.00020823 | 1.63E-02   | 0.83623185 |
| SEMA3E      | -0.261845  | 8.28576234 | -4.0502552 | 0.00102725 | 0.0357774  | -0.691809  |
| LRRTM3      | -0.2628526 | 8.17919309 | -5.2516259 | 9.45E-05   | 1.05E-02   | 1.59174934 |
| AGXT2L1     | -0.2649321 | 7.87128236 | -4.9046558 | 0.00018522 | 0.01551316 | 0.94826317 |
| TSPYL4      | -0.2687866 | 7.58542523 | -3.9549128 | 0.00124833 | 3.99E-02   | -0.8781628 |
| LOC1000446  | -0.2703619 | 12.0216155 | -4.1961473 | 0.00076321 | 0.0298302  | -0.4075351 |
| ZEB2        | -0.2713207 | 9.56213709 | -5.5502938 | 5.36E-05   | 7.75E-03   | 2.13261906 |
| KRT12       | -0.2730527 | 9.48776137 | -5.2781817 | 8.98E-05   | 1.04E-02   | 1.64034588 |
| ROCK2       | -0.2731807 | 8.32769383 | -5.110957  | 0.0001239  | 0.01221994 | 1.3327442  |
| CRHBP       | -0.2741212 | 11.0537709 | -3.9402409 | 0.0012864  | 4.05E-02   | -0.9068723 |
| TCFE3       | -0.274433  | 7.80417078 | -6.2054947 | 1.61E-05   | 0.00452793 | 3.27300722 |
| DPM2        | -0.2764758 | 9.4302523  | -4.9611136 | 0.00016584 | 1.46E-02   | 1.05401106 |
| VCL         | -0.2777903 | 9.080144   | -4.2263295 | 0.00071785 | 0.02924899 | -0.3488853 |



|             |            |            |            |            |            |            |
|-------------|------------|------------|------------|------------|------------|------------|
| DUSP6       | -0.2778275 | 10.1133136 | -4.9590286 | 0.00016652 | 0.01464378 | 1.05011267 |
| S100B       | -0.2782768 | 7.76645434 | -5.203773  | 0.00010357 | 1.11E-02   | 1.50E+00   |
| ABCD2       | -0.2797512 | 8.00728519 | -6.0263116 | 2.22E-05   | 5.23E-03   | 2.97E+00   |
| PTGES3      | -0.2801972 | 9.39721669 | -4.33115   | 0.00058059 | 0.02624452 | -0.1456971 |
| PDE7B       | -0.2802485 | 7.28792668 | -5.913423  | 2.73E-05   | 5.60E-03   | 2.77E+00   |
| GJB6        | -0.2803689 | 10.7561347 | -4.6565323 | 0.00030237 | 0.01899364 | 0.47911045 |
| ARC         | -0.2808685 | 10.6445515 | -5.0240931 | 0.00014667 | 1.35E-02   | 1.17151024 |
| BUD31       | -0.2824499 | 9.64798818 | -4.1005395 | 0.00092711 | 3.34E-02   | -0.5936946 |
| 4930452B06I | -0.2849159 | 7.91131012 | -4.3503645 | 0.0005585  | 0.02585    | -0.108541  |
| ARMCX5      | -0.2862827 | 9.46208071 | -4.7430891 | 0.00025466 | 0.01791594 | 0.64355709 |
| NPY         | -0.2884273 | 11.0205184 | -5.1801391 | 0.0001084  | 1.12E-02   | 1.46E+00   |
| LOC1000467  | -0.2941196 | 8.17221881 | -4.3798307 | 0.00052627 | 0.02512981 | -0.0516183 |
| ATP2B2      | -0.294262  | 9.75118756 | -5.6736801 | 4.25E-05   | 7.12E-03   | 2.3523198  |
| PIK3R4      | -0.2981058 | 8.10399151 | -3.7927327 | 0.00174104 | 4.77E-02   | -1.1958532 |
| ANKRD17     | -0.2985232 | 8.14666661 | -3.9958338 | 0.00114806 | 0.0382079  | -0.7981326 |
| BC048546    | -0.3012398 | 9.075915   | -7.0114567 | 3.97E-06   | 2.21E-03   | 4.58E+00   |
| NECAB1      | -0.3017738 | 8.96109015 | -4.5388569 | 0.00038238 | 0.0221909  | 0.25429137 |
| GOPC        | -0.3037702 | 7.6724985  | -3.8798433 | 0.00145592 | 4.35E-02   | -1.02513   |
| CBLN2       | -0.3061529 | 8.07849599 | -5.7165931 | 3.93E-05   | 6.68E-03   | 2.43E+00   |
| RGS4        | -0.3100428 | 12.4503255 | -6.5278693 | 9.10E-06   | 4.00E-03   | 3.80979268 |
| EMB         | -0.31112   | 9.94787478 | -4.2136983 | 0.00073649 | 0.02955201 | -0.3734228 |
| DGKB        | -0.3121388 | 9.55066216 | -5.1294122 | 0.00011955 | 0.01201577 | 1.36687435 |
| ALDH1A1     | -0.3133309 | 7.92979    | -4.191165  | 0.00077097 | 2.99E-02   | -0.4172225 |
| TMEM32      | -0.3137053 | 8.91632432 | -4.801363  | 0.00022696 | 0.0168666  | 0.75380551 |
| KCNA1       | -0.3137182 | 9.98315271 | -5.2937828 | 8.71E-05   | 1.03E-02   | 1.66885031 |
| C1GALT1C1   | -0.3148493 | 9.03711403 | -4.9198831 | 0.00017978 | 0.01517738 | 0.97682279 |
| ELAVL4      | -0.3153791 | 9.19286119 | -4.6573854 | 0.00030186 | 0.01899364 | 0.48073514 |
| TJP1        | -0.3153984 | 8.39715144 | -4.4443447 | 0.00046218 | 0.0245493  | 0.07275579 |
| TBC1D19     | -0.3156915 | 8.62820636 | -4.0011287 | 0.0011357  | 0.0382079  | -0.7877823 |
| GLRX2       | -0.3162618 | 8.89396468 | -4.0976545 | 0.00093257 | 0.03347432 | -0.5993203 |
| OSBP2       | -0.3166724 | 9.0516124  | -4.3657071 | 0.00054147 | 0.02562392 | -0.0788934 |
| NDUFB2      | -0.3173516 | 8.82695992 | -4.3816734 | 0.00052432 | 0.02512981 | -0.0480609 |
| FGF12       | -0.3210532 | 9.61837415 | -4.7582117 | 0.00024715 | 0.01769331 | 0.67220425 |
| EVL         | -0.3212908 | 10.0572227 | -5.6296568 | 4.62E-05   | 0.00738117 | 2.2741892  |
| ATAD1       | -0.3213514 | 9.88655588 | -4.8089294 | 0.00022359 | 0.01684358 | 0.76809201 |
| KCNAB3      | -0.3227959 | 7.99494232 | -4.8657798 | 0.00019991 | 1.60E-02   | 0.87522302 |
| FEZ2        | -0.3252718 | 9.51004821 | -3.9261198 | 0.00132415 | 4.10E-02   | -0.9345111 |
| KCNV1       | -0.3267426 | 9.38054021 | -4.6831369 | 0.0002868  | 0.01868271 | 0.52974153 |
| A530082C11  | -0.3276608 | 8.56951605 | -5.1636508 | 0.0001119  | 1.15E-02   | 1.430075   |
| COCH        | -0.3278033 | 7.74142953 | -5.7858544 | 3.45E-05   | 6.18E-03   | 2.55009738 |
| HSBP1       | -0.3281009 | 11.7542797 | -4.4096334 | 0.0004956  | 0.02478703 | 0.00588149 |
| MRPS15      | -0.3293276 | 8.49057374 | -4.4526901 | 0.00045449 | 0.0245493  | 0.0888181  |
| SLC7A10     | -0.3294488 | 8.63636723 | -5.9583629 | 2.52E-05   | 5.53E-03   | 2.85054707 |

|            |            |            |            |            |            |            |
|------------|------------|------------|------------|------------|------------|------------|
| RASSF3     | -0.3306074 | 8.62985941 | -4.2727716 | 0.00065336 | 2.76E-02   | -0.2587612 |
| FUT9       | -0.3308313 | 7.660745   | -6.1835946 | 1.67E-05   | 4.53E-03   | 3.23595216 |
| MEGF9      | -0.3309573 | 9.48482227 | -5.8676046 | 2.97E-05   | 5.60E-03   | 2.69304151 |
| PRMT8      | -0.3311151 | 9.22871897 | -4.6947818 | 0.00028025 | 0.01842835 | 0.55187918 |
| 2410129H14 | -0.3320526 | 9.22034873 | -4.4203997 | 0.00048498 | 0.02472631 | 0.02663478 |
| RSPRY1     | -0.3350399 | 7.64991849 | -4.8844154 | 0.00019273 | 0.01588044 | 0.91025803 |
| UBE2J1     | -0.3358892 | 8.76611148 | -4.3939438 | 0.00051151 | 0.02482434 | -0.0243799 |
| P2RY12     | -0.3396272 | 8.52596033 | -4.8701813 | 0.00019819 | 0.01596588 | 0.88350145 |
| PPM1L      | -0.3404825 | 10.4327393 | -6.5622083 | 8.57E-06   | 0.00393131 | 3.86601009 |
| OPN3       | -0.34423   | 7.70812162 | -6.1897985 | 1.65E-05   | 4.53E-03   | 3.25E+00   |
| HSF2       | -0.3463818 | 7.9405795  | -4.6222493 | 0.00032373 | 0.01963387 | 0.41375753 |
| ADAM9      | -0.347451  | 8.77264722 | -5.5420006 | 5.44E-05   | 0.00774783 | 2.1177724  |
| NFU1       | -0.3480531 | 8.01526895 | -4.4361235 | 0.00046988 | 0.02455524 | 0.05692644 |
| MRPL20     | -0.3532792 | 10.2726085 | -4.2475859 | 0.00068756 | 0.02823293 | -0.307617  |
| UCHL5      | -0.354402  | 9.55696917 | -5.4956046 | 5.94E-05   | 8.25E-03   | 2.03452871 |
| TAF13      | -0.3568287 | 9.24950745 | -6.0788256 | 2.02E-05   | 0.00507774 | 3.05765198 |
| GSTM5      | -0.3580918 | 11.4669217 | -4.6941393 | 0.0002806  | 0.01842835 | 0.55065813 |
| PVALB      | -0.3602049 | 11.5716975 | -4.7950565 | 0.0002298  | 0.01695839 | 0.74189277 |
| TOMM70A    | -0.3606    | 9.46477595 | -3.9956403 | 0.00114852 | 3.82E-02   | -0.7985109 |
| COX7B      | -0.3606128 | 9.23467748 | -4.1138217 | 0.00090235 | 3.28E-02   | -0.5678009 |
| LOC1000417 | -0.3627094 | 7.83273804 | -4.1641902 | 0.00081442 | 0.03058586 | -0.4696981 |
| CAMKK2     | -0.3662128 | 9.58144867 | -6.9217957 | 4.62E-06   | 2.42E-03   | 4.44E+00   |
| TMEM184C   | -0.3682301 | 8.99181088 | -6.0321262 | 2.20E-05   | 5.23E-03   | 2.97762955 |
| MTMR12     | -0.3689504 | 9.87382074 | -5.8116403 | 3.29E-05   | 0.00602717 | 2.59529441 |
| HSD11B1    | -0.3729202 | 9.32102244 | -8.7721235 | 2.52E-07   | 3.45E-04   | 7.10E+00   |
| R3HDM2     | -0.3745464 | 10.6348487 | -4.4235691 | 0.00048189 | 0.02472631 | 0.03274241 |
| NSG1       | -0.3752331 | 8.78126024 | -3.9725502 | 0.00120407 | 3.90E-02   | -0.843661  |
| DLD        | -0.3796641 | 9.03552759 | -4.0591807 | 0.0010087  | 3.54E-02   | -0.6743843 |
| CDH22      | -0.383858  | 7.89125551 | -4.8116525 | 0.0002224  | 0.01684358 | 0.77323214 |
| SEPT7      | -0.3979808 | 8.20691273 | -4.8807435 | 0.00019412 | 1.59E-02   | 0.90335804 |
| KPNB1      | -0.3990332 | 10.2243301 | -4.838045  | 0.00021113 | 0.01638243 | 0.82300559 |
| SMPD4      | -0.401809  | 8.12718492 | -3.8220307 | 0.00163934 | 4.64E-02   | -1.14E+00  |
| RORA       | -0.4037972 | 8.98348808 | -6.2037278 | 1.61E-05   | 4.53E-03   | 3.27002027 |
| PDZRN3     | -0.4054322 | 9.21724556 | -7.018465  | 3.93E-06   | 2.21E-03   | 4.59539133 |
| FOS        | -0.4137438 | 9.76647721 | -7.8119955 | 1.08E-06   | 8.14E-04   | 5.79E+00   |
| SLC12A5    | -0.4141472 | 8.21189792 | -4.0657394 | 0.00099529 | 3.52E-02   | -0.6615827 |
| GPM6B      | -0.4221178 | 8.30149019 | -5.5611753 | 5.25E-05   | 0.00774783 | 2.15208443 |
| SCN1A      | -0.4257585 | 10.2520814 | -5.8968591 | 2.81E-05   | 5.60E-03   | 2.74E+00   |
| LOC1000485 | -0.4387017 | 8.46021607 | -5.3749709 | 7.46E-05   | 0.00948938 | 1.81664389 |
| DUSP1      | -0.4567765 | 10.5911814 | -7.3992655 | 2.09E-06   | 1.47E-03   | 5.17928046 |
| CYFIP2     | -0.4615227 | 10.3946373 | -4.2063774 | 0.00074752 | 0.02976812 | -0.3876493 |
| JAK1       | -0.4617828 | 8.62220612 | -5.1973966 | 0.00010485 | 0.01106516 | 1.49221358 |
| FOXG1      | -0.4819767 | 10.7068772 | -4.3459428 | 0.0005635  | 0.02596788 | -0.1170889 |

|            |            |            |            |            |            |            |
|------------|------------|------------|------------|------------|------------|------------|
| LPGAT1     | -0.4892176 | 8.4351187  | -6.0042563 | 2.31E-05   | 5.31E-03   | 2.92971234 |
| A030009H04 | -0.4954271 | 9.0145     | -3.9348605 | 0.00130065 | 4.07E-02   | -9.17E-01  |
| GLUL       | -0.5039776 | 8.42803552 | -4.7359275 | 0.00025829 | 0.01793268 | 0.62998192 |
| PGRMC1     | -0.5176179 | 10.4057758 | -4.8717274 | 0.00019759 | 1.60E-02   | 0.88640907 |
| NDUFB4     | -0.5197932 | 9.02585354 | -5.903097  | 2.78E-05   | 5.60E-03   | 2.75E+00   |
| SETD3      | -0.5198583 | 9.38776346 | -4.1998547 | 0.00075748 | 0.0298302  | -0.4003278 |
| LOC668837  | -0.5489508 | 9.74082912 | -8.1495662 | 6.39E-07   | 0.00059115 | 6.26514536 |
| NDRG4      | -0.5698097 | 12.0568899 | -4.4509499 | 0.00045608 | 0.0245493  | 0.08546931 |
| NPAS4      | -0.5894663 | 8.18395513 | -11.34106  | 8.37E-09   | 2.94E-05   | 1.00E+01   |
| ID2        | -0.6029888 | 9.26615316 | -5.6181355 | 4.72E-05   | 7.43E-03   | 2.25E+00   |
| NDUFB5     | -0.6160481 | 10.2090556 | -3.7612511 | 0.00185744 | 5.00E-02   | -1.26E+00  |
| NEFM       | -0.7623033 | 10.0428796 | -5.4238201 | 6.80E-05   | 0.00912512 | 1.90512316 |
| REXO1      | -0.8749936 | 13.4383849 | -4.8478587 | 0.00020709 | 0.01627727 | 0.84149261 |

## DEGs in susceptible right mPFC

adj.P.Value < 0.05

DEGup 240

DEGdown 240

| Gene       | logFC    | AveExpr  | t        | P.Value  | adj.P.Val | B           |
|------------|----------|----------|----------|----------|-----------|-------------|
| CTGF       | 0.888018 | 10.55685 | 18.60342 | 7.56E-12 | 7.97E-08  | 1.61E+01    |
| HBA-A1     | 0.829271 | 12.60395 | 12.15645 | 3.22E-09 | 8.51E-06  | 1.12E+01    |
| RPRM       | 0.794649 | 11.03412 | 9.025641 | 1.74E-07 | 1.08E-04  | 7.59E+00    |
| SLA        | 0.655077 | 8.890923 | 10.93873 | 1.37E-08 | 1.44E-05  | 9.93E+00    |
| SEMA5A     | 0.570781 | 9.76898  | 11.44272 | 7.41E-09 | 1.12E-05  | 1.05E+01    |
| ZFPM2      | 0.529271 | 10.0211  | 10.29118 | 3.11E-08 | 2.98E-05  | 9.18E+00    |
| SULF1      | 0.514473 | 8.768357 | 11.16702 | 1.03E-08 | 1.21E-05  | 1.02E+01    |
| ADRA2A     | 0.4749   | 8.965451 | 8.916121 | 2.04E-07 | 1.17E-04  | 7.44E+00    |
| PRSS35     | 0.472352 | 8.502893 | 7.737558 | 1.21E-06 | 3.97E-04  | 5.754815699 |
| HBB-B1     | 0.452332 | 8.799639 | 4.693332 | 0.000281 | 0.014105  | 0.461461152 |
| SGK1       | 0.429066 | 11.44792 | 9.64377  | 7.36E-08 | 5.23E-05  | 8.393298661 |
| MOG        | 0.427892 | 8.901772 | 9.636345 | 7.43E-08 | 5.23E-05  | 8.38E+00    |
| SPSB1      | 0.427801 | 9.264227 | 7.339956 | 2.30E-06 | 6.08E-04  | 5.140670155 |
| FDPS       | 0.423435 | 10.83188 | 7.000109 | 4.05E-06 | 9.00E-04  | 4.60E+00    |
| GLRA2      | 0.421272 | 9.669872 | 6.291631 | 1.38E-05 | 2.08E-03  | 3.408364162 |
| PRR18      | 0.41105  | 10.29879 | 5.599801 | 4.88E-05 | 0.004906  | 2.175347923 |
| IGSF21     | 0.40723  | 9.680149 | 5.20922  | 0.000102 | 0.007671  | 1.449413529 |
| PPP1R1B    | 0.401553 | 8.97316  | 8.15347  | 6.35E-07 | 2.68E-04  | 6.37E+00    |
| FUS        | 0.398458 | 8.26822  | 6.212252 | 1.59E-05 | 0.002207  | 3.270464157 |
| NOS1AP     | 0.393522 | 8.453826 | 5.112501 | 0.000124 | 0.008629  | 1.266576692 |
| RAI14      | 0.391675 | 8.747604 | 8.348042 | 4.72E-07 | 2.17E-04  | 6.653421325 |
| GABARAPL1  | 0.391325 | 11.87212 | 5.639875 | 4.53E-05 | 0.00464   | 2.248653797 |
| GARNL3     | 0.366239 | 11.71781 | 5.649559 | 4.45E-05 | 4.60E-03  | 2.266333405 |
| STK32C     | 0.363203 | 9.137387 | 6.300064 | 1.36E-05 | 2.08E-03  | 3.422959169 |
| NTSR1      | 0.360795 | 8.087294 | 5.753391 | 3.67E-05 | 3.99E-03  | 2.455073798 |
| FOXN3      | 0.354447 | 8.552932 | 5.794209 | 3.40E-05 | 0.003858  | 2.52884974  |
| DDAH1      | 0.353899 | 11.28131 | 6.215663 | 1.58E-05 | 2.21E-03  | 3.276409062 |
| ANLN       | 0.352362 | 8.280857 | 6.79333  | 5.75E-06 | 1.17E-03  | 4.258026273 |
| FA2H       | 0.350201 | 10.11226 | 6.745467 | 6.24E-06 | 0.001203  | 4.17860405  |
| CPLX2      | 0.350024 | 10.7641  | 6.418799 | 1.10E-05 | 1.85E-03  | 3.627316305 |
| FAM20B     | 0.341027 | 9.404528 | 6.198557 | 1.63E-05 | 2.23E-03  | 3.25E+00    |
| TLE4       | 0.336238 | 10.51575 | 7.736988 | 1.22E-06 | 3.97E-04  | 5.753950923 |
| STMN4      | 0.335442 | 9.660887 | 7.622246 | 1.46E-06 | 4.40E-04  | 5.58E+00    |
| ENSMUSG000 | 0.331249 | 7.882982 | 7.818698 | 1.07E-06 | 3.89E-04  | 5.877312389 |
| COL6A1     | 0.327605 | 9.225453 | 7.23274  | 2.75E-06 | 6.74E-04  | 4.97E+00    |
| TRF        | 0.326206 | 10.38794 | 4.579467 | 0.000353 | 0.016318  | 0.239545765 |
| CNTNAP4    | 0.325434 | 9.846148 | 5.872479 | 2.94E-05 | 0.003428  | 2.669647322 |

|             |          |          |          |          |          |              |
|-------------|----------|----------|----------|----------|----------|--------------|
| OGFRL1      | 0.316944 | 10.94292 | 4.625934 | 0.000321 | 0.015485 | 0.330255984  |
| D12ERTD647E | 0.315275 | 9.969361 | 7.862237 | 9.97E-07 | 3.76E-04 | 5.94E+00     |
| RASL10A     | 0.313269 | 9.588202 | 5.311853 | 8.42E-05 | 6.95E-03 | 1.642133018  |
| LITAF       | 0.312848 | 9.402568 | 6.244316 | 1.50E-05 | 2.16E-03 | 3.326281326  |
| AHI1        | 0.31171  | 10.57708 | 5.172624 | 0.00011  | 8.00E-03 | 1.380370424  |
| SNRPD3      | 0.310925 | 10.62739 | 5.022377 | 0.000147 | 0.00963  | 1.095169336  |
| PIK3R3      | 0.309435 | 10.28267 | 5.386326 | 7.30E-05 | 0.00637  | 1.781112573  |
| FEZF2       | 0.307236 | 9.724721 | 4.691593 | 0.000282 | 0.014105 | 0.458080558  |
| FANCD2      | 0.305371 | 8.110228 | 7.151087 | 3.15E-06 | 7.54E-04 | 4.840758879  |
| RGS9        | 0.303976 | 8.980841 | 5.260751 | 9.28E-05 | 7.05E-03 | 1.546346213  |
| LY6G6E      | 0.301729 | 7.750259 | 5.880505 | 2.90E-05 | 3.43E-03 | 2.684035024  |
| EVI2A       | 0.300796 | 8.523316 | 5.512408 | 5.75E-05 | 5.52E-03 | 2.014708722  |
| ST3GAL5     | 0.30026  | 9.919604 | 5.105675 | 0.000125 | 0.008634 | 1.253628759  |
| RPS26       | 0.298635 | 11.85228 | 5.403605 | 7.07E-05 | 6.22E-03 | 1.813252515  |
| ARHGAP25    | 0.298005 | 8.662254 | 6.038876 | 2.17E-05 | 0.002796 | 2.966010853  |
| PADI6       | 0.297851 | 7.451042 | 6.088526 | 1.99E-05 | 2.59E-03 | 3.05365402   |
| ZMIZ1       | 0.297064 | 8.750812 | 6.269359 | 1.44E-05 | 2.10E-03 | 3.369767531  |
| TMEM132D    | 0.292858 | 8.122685 | 7.255845 | 2.64E-06 | 6.65E-04 | 5.00776405   |
| SUMO3       | 0.291172 | 9.241103 | 3.997873 | 0.001143 | 0.032088 | -0.909649739 |
| BLMH        | 0.29116  | 8.428104 | 5.109351 | 0.000124 | 0.008629 | 1.260601839  |
| LMO3        | 0.289471 | 8.373424 | 6.238627 | 1.52E-05 | 2.16E-03 | 3.316388848  |
| RAMP3       | 0.288744 | 8.392446 | 6.798962 | 5.69E-06 | 0.001166 | 4.267349072  |
| P140        | 0.288029 | 8.305353 | 5.995422 | 2.35E-05 | 2.95E-03 | 2.889007513  |
| LRFN2       | 0.286158 | 8.801948 | 3.934093 | 0.001303 | 0.034803 | -1.036760072 |
| DBNDD2      | 0.285931 | 11.0243  | 6.438277 | 1.06E-05 | 0.001812 | 3.660638093  |
| LOC10004758 | 0.282914 | 9.874884 | 5.032957 | 0.000144 | 0.009568 | 1.115341196  |
| CDH13       | 0.282687 | 8.439697 | 6.993361 | 4.09E-06 | 9.00E-04 | 4.59E+00     |
| APPBP2      | 0.282053 | 10.5446  | 4.748293 | 0.000252 | 0.013502 | 0.568120633  |
| CRYM        | 0.281089 | 11.54698 | 3.961087 | 0.001233 | 0.033592 | -0.982947474 |
| ANO4        | 0.280008 | 8.816755 | 4.7326   | 0.00026  | 0.013719 | 0.537698112  |
| TMSB10      | 0.279349 | 11.06222 | 4.918973 | 0.00018  | 0.011114 | 0.897316876  |
| GPN3        | 0.276842 | 8.406506 | 5.155838 | 0.000114 | 0.0081   | 1.348644957  |
| DYNLL2      | 0.275974 | 8.9233   | 5.613077 | 4.76E-05 | 4.83E-03 | 2.20E+00     |
| ZYX         | 0.275789 | 11.00474 | 4.995141 | 0.000155 | 0.01     | 1.043176464  |
| PLEKHA2     | 0.27473  | 9.379361 | 5.159262 | 0.000113 | 0.0081   | 1.355119043  |
| EG434858    | 0.271693 | 8.69901  | 6.714515 | 6.58E-06 | 1.22E-03 | 4.127059045  |
| EEF2        | 0.27014  | 8.350257 | 5.434686 | 6.66E-05 | 0.006013 | 1.87096427   |
| BCL11B      | 0.269008 | 10.63047 | 3.886128 | 0.001437 | 0.036515 | -1.13242335  |
| TATDN2      | 0.267212 | 8.410132 | 6.08729  | 1.99E-05 | 0.002593 | 3.051476655  |
| GSK3B       | 0.266202 | 9.105032 | 4.272594 | 0.000654 | 0.023702 | -0.364082683 |
| CBX5        | 0.265504 | 8.903005 | 4.008574 | 0.001119 | 3.17E-02 | -0.888334255 |
| RASL11B     | 0.261901 | 11.25043 | 6.595553 | 8.09E-06 | 1.45E-03 | 3.93E+00     |
| ALAS2       | 0.26056  | 7.583163 | 4.08517  | 0.000957 | 0.029605 | -0.735894764 |

|              |          |          |          |          |          |              |
|--------------|----------|----------|----------|----------|----------|--------------|
| LOC10004150  | 0.25962  | 8.657669 | 4.649746 | 0.000306 | 0.014974 | 0.376662005  |
| FKBP2        | 0.254815 | 9.830134 | 4.548272 | 0.000375 | 0.016851 | 0.178537075  |
| GABBR1       | 0.254073 | 8.463038 | 5.76111  | 3.61E-05 | 3.97E-03 | 2.469043476  |
| LOC10004613  | 0.253444 | 8.011977 | 4.75873  | 0.000247 | 0.013293 | 0.588340533  |
| PSMB10       | 0.252859 | 9.812459 | 4.502734 | 0.000411 | 0.01768  | 0.08932394   |
| DYNC111      | 0.251687 | 9.345363 | 5.495535 | 5.94E-05 | 5.60E-03 | 1.98357222   |
| VANGL2       | 0.251133 | 8.243392 | 6.312204 | 1.33E-05 | 2.06E-03 | 3.443949314  |
| ZDHHC9       | 0.250827 | 8.576029 | 4.4158   | 0.000489 | 0.019905 | -0.081472774 |
| POLD2        | 0.249868 | 8.169336 | 5.27087  | 9.11E-05 | 7.00E-03 | 1.565340272  |
| COL5A1       | 0.249742 | 8.052943 | 6.527431 | 9.10E-06 | 1.57E-03 | 3.812428642  |
| 6430598A04R1 | 0.249098 | 8.393332 | 4.767681 | 0.000243 | 0.013263 | 0.60567257   |
| GM1821       | 0.248521 | 14.51018 | 5.661422 | 4.35E-05 | 4.55E-03 | 2.287974919  |
| LOC10004612  | 0.248317 | 7.99283  | 4.414862 | 0.00049  | 0.019905 | -0.083320519 |
| CLDN11       | 0.248315 | 12.82258 | 4.603057 | 0.000336 | 0.015779 | 0.28562152   |
| STAC2        | 0.246349 | 10.06809 | 4.476379 | 0.000433 | 0.018148 | 0.037609116  |
| SLC35F3      | 0.246099 | 10.5571  | 5.085627 | 0.00013  | 0.00886  | 1.215567095  |
| SYT5         | 0.244676 | 10.3186  | 4.881756 | 0.000194 | 0.011617 | 0.825806989  |
| RAP1GAP      | 0.243312 | 7.960334 | 4.662564 | 0.000299 | 0.014733 | 0.401618834  |
| COG1         | 0.242909 | 8.320809 | 5.368852 | 7.55E-05 | 0.006532 | 1.748568143  |
| NUP93        | 0.242263 | 8.254299 | 4.02679  | 0.001078 | 0.031278 | -0.85206092  |
| KHDRBS1      | 0.241122 | 8.73763  | 5.020027 | 0.000148 | 0.00963  | 1.090685105  |
| EZH1         | 0.239171 | 7.714855 | 4.978902 | 0.00016  | 1.02E-02 | 1.012135808  |
| VTI1B        | 0.238599 | 12.22503 | 4.37756  | 0.000529 | 0.020835 | -0.156791872 |
| AGPAT4       | 0.238511 | 9.419419 | 4.30672  | 0.00061  | 0.02299  | -0.296605636 |
| MMP16        | 0.238449 | 8.328217 | 3.686688 | 0.002165 | 4.81E-02 | -1.53E+00    |
| ARHGEF15     | 0.237402 | 8.08675  | 5.317903 | 8.32E-05 | 0.00695  | 1.653449425  |
| LOC10004325  | 0.236612 | 9.951471 | 4.515598 | 0.000401 | 0.017397 | 0.114543403  |
| PSMB4        | 0.236517 | 12.44938 | 4.145251 | 0.000846 | 0.027399 | -0.616501887 |
| 1500011H22R  | 0.23562  | 10.14294 | 4.020876 | 0.001091 | 0.031365 | -0.863836527 |
| HSD17B11     | 0.235383 | 7.926266 | 4.937598 | 0.000174 | 0.010908 | 0.93304472   |
| NME2         | 0.235    | 10.32974 | 4.77499  | 0.000239 | 0.013141 | 0.619819608  |
| VPS25        | 0.234495 | 8.981466 | 5.527866 | 5.59E-05 | 0.00541  | 2.043199626  |
| ATP2B1       | 0.234103 | 9.343558 | 4.373457 | 0.000533 | 0.020835 | -0.164879971 |
| NMRAL1       | 0.23381  | 8.267957 | 5.286857 | 8.83E-05 | 0.007001 | 1.595321274  |
| RCAN3        | 0.23336  | 9.859845 | 3.944845 | 0.001274 | 3.44E-02 | -1.015323959 |
| MOBP         | 0.233312 | 9.052363 | 5.325843 | 8.20E-05 | 6.92E-03 | 1.668295262  |
| HRMT1L2      | 0.232888 | 10.48449 | 4.253057 | 0.00068  | 0.024325 | -0.402746217 |
| GAB1         | 0.232142 | 9.003693 | 5.435949 | 6.65E-05 | 0.006013 | 1.873306102  |
| DPYSL5       | 0.23193  | 7.951066 | 4.788025 | 0.000233 | 0.012942 | 0.645034391  |
| ORC6L        | 0.231907 | 9.613107 | 4.707184 | 0.000273 | 0.01401  | 0.488371799  |
| GRIK1        | 0.231209 | 8.822511 | 4.489672 | 0.000422 | 0.017956 | 0.063700669  |
| PDLIM1       | 0.230388 | 8.85     | 4.209783 | 0.000742 | 0.025654 | -0.488468884 |
| LRRTM2       | 0.229543 | 9.535346 | 4.080829 | 0.000965 | 0.029781 | -0.744528938 |

|               |          |          |          |          |          |              |
|---------------|----------|----------|----------|----------|----------|--------------|
| SOX5          | 0.22812  | 8.718758 | 5.18133  | 0.000108 | 8.00E-03 | 1.39681199   |
| COX17         | 0.22789  | 11.62163 | 3.710215 | 0.002063 | 4.64E-02 | -1.48E+00    |
| DLG4          | 0.227613 | 9.496925 | 3.819769 | 0.001647 | 0.040233 | -1.264840983 |
| WSCD1         | 0.227225 | 8.908179 | 4.017456 | 0.001098 | 3.15E-02 | -0.870647092 |
| PRR7          | 0.226718 | 9.384036 | 4.498759 | 0.000414 | 0.017703 | 0.081527417  |
| PLCL2         | 0.226252 | 10.44229 | 4.559549 | 0.000367 | 0.016688 | 0.200602313  |
| ACTR1A        | 0.225165 | 10.82985 | 5.276126 | 9.01E-05 | 0.007001 | 1.57520111   |
| PIGK          | 0.225097 | 7.897873 | 5.179705 | 0.000108 | 0.008004 | 1.393744144  |
| NT5C3         | 0.224887 | 9.616987 | 5.024694 | 0.000146 | 0.00963  | 1.099587659  |
| UNC5B         | 0.224681 | 7.855626 | 5.42573  | 6.78E-05 | 6.06E-03 | 1.854348604  |
| DDR1          | 0.224077 | 8.746017 | 4.345532 | 0.000564 | 0.021642 | -0.219959442 |
| DCTN1         | 0.223405 | 9.172176 | 4.717037 | 0.000268 | 0.013871 | 0.507501341  |
| CCL21A        | 0.222402 | 9.212146 | 4.093248 | 0.000941 | 0.029293 | -0.719832428 |
| STARD3NL      | 0.222166 | 8.993388 | 4.220249 | 0.000727 | 0.025229 | -0.467726521 |
| CASK          | 0.221946 | 10.107   | 4.184861 | 0.000781 | 0.026409 | -0.53788685  |
| CDS2          | 0.221907 | 7.920417 | 4.903823 | 0.000186 | 1.14E-02 | 0.868226568  |
| MAGI2         | 0.221738 | 7.583132 | 4.400717 | 0.000505 | 0.020338 | -0.111169267 |
| TCEAL3        | 0.220565 | 8.924958 | 4.602955 | 0.000336 | 0.015779 | 0.285422319  |
| EXTL1         | 0.219543 | 8.809089 | 4.022838 | 0.001086 | 0.031325 | -0.859928511 |
| D11MOH35      | 0.217242 | 7.827309 | 5.844545 | 3.10E-05 | 3.55E-03 | 2.619499862  |
| DRD1A         | 0.21604  | 8.898292 | 3.963323 | 0.001227 | 0.033546 | -0.978492079 |
| LOC10004770   | 0.215854 | 10.11424 | 3.894573 | 0.001413 | 0.03627  | -1.115577756 |
| SSU72         | 0.215467 | 11.41431 | 4.274602 | 0.000651 | 0.023688 | -0.360109092 |
| ARRDC4        | 0.214684 | 8.320606 | 4.17093  | 0.000803 | 0.026621 | -0.56552742  |
| RNF113A2      | 0.214206 | 9.034929 | 4.057684 | 0.001012 | 0.030257 | -0.790570765 |
| LSM8          | 0.213394 | 9.56242  | 3.807777 | 0.001688 | 4.09E-02 | -1.288775065 |
| IVNS1ABP      | 0.213157 | 8.896972 | 4.069851 | 0.000987 | 0.029924 | -0.766364269 |
| DPYSL3        | 0.212903 | 8.247197 | 3.803076 | 0.001704 | 4.09E-02 | -1.30E+00    |
| PSMD4         | 0.212686 | 11.68837 | 4.280246 | 0.000644 | 0.023663 | -0.348944976 |
| H2-T23        | 0.212437 | 8.456817 | 4.81632  | 0.00022  | 0.012484 | 0.699705007  |
| MBP           | 0.21204  | 12.4868  | 4.969632 | 0.000163 | 0.010307 | 0.994402091  |
| NRP1          | 0.211727 | 9.840109 | 3.889258 | 0.001428 | 0.03649  | -1.126179927 |
| 1190003J15RII | 0.210432 | 7.933184 | 4.603781 | 0.000336 | 0.015779 | 0.287035692  |
| MECP2         | 0.210115 | 9.311704 | 5.14837  | 0.000115 | 8.11E-03 | 1.334519943  |
| SAMD9L        | 0.209404 | 8.2146   | 4.003226 | 0.001131 | 0.031904 | -0.898985644 |
| EXOC4         | 0.209185 | 8.785003 | 4.759542 | 0.000247 | 0.013293 | 0.589913094  |
| ZFP282        | 0.208713 | 8.667863 | 4.164224 | 0.000814 | 0.026773 | -0.578835638 |
| BCLAF1        | 0.208095 | 10.99544 | 4.164488 | 0.000814 | 0.026773 | -0.578311404 |
| EXOSC4        | 0.20767  | 8.799763 | 3.806394 | 0.001693 | 0.040879 | -1.291536217 |
| D430041B17R   | 0.206259 | 9.123235 | 4.476915 | 0.000433 | 0.018148 | 0.038663285  |
| D030056L22RI  | 0.206206 | 10.90586 | 3.902502 | 0.00139  | 0.03605  | -1.099761986 |
| TPBG          | 0.205956 | 8.884654 | 4.073959 | 0.000979 | 0.029919 | -0.758191315 |
| CLPP          | 0.204998 | 8.906726 | 3.885402 | 0.001439 | 0.036515 | -1.133871788 |

|              |          |          |          |          |          |              |
|--------------|----------|----------|----------|----------|----------|--------------|
| PACRG        | 0.204377 | 9.414803 | 4.419204 | 0.000486 | 0.019885 | -0.074775295 |
| IL11RA1      | 0.20408  | 11.04973 | 4.035309 | 0.001059 | 0.031132 | -0.835100223 |
| TPM3         | 0.204064 | 8.404092 | 4.620472 | 0.000325 | 0.015584 | 0.319603189  |
| GADD45A      | 0.203275 | 8.596068 | 4.57217  | 0.000358 | 0.016486 | 0.225283495  |
| TPR          | 0.202675 | 9.902227 | 3.915704 | 0.001353 | 0.035511 | -1.073430714 |
| 5430437P03RI | 0.201542 | 9.352445 | 4.722822 | 0.000265 | 0.013852 | 0.518728396  |
| LOR          | 0.20074  | 9.268759 | 4.971846 | 0.000162 | 0.010307 | 0.998639612  |
| CARHSP1      | 0.200392 | 8.668882 | 4.814037 | 0.000221 | 1.25E-02 | 0.6952965    |
| ITGB4        | 0.200262 | 7.81662  | 4.501433 | 0.000412 | 0.01768  | 0.086771764  |
| SFRS5        | 0.200049 | 10.07632 | 4.398723 | 0.000507 | 0.020338 | -0.115095358 |
| RPS4X        | 0.199753 | 12.70981 | 4.029469 | 0.001072 | 0.031278 | -0.846727247 |
| XAB1         | 0.19931  | 9.11145  | 4.564444 | 0.000363 | 0.016669 | 0.210175923  |
| NETO1        | 0.199006 | 8.955297 | 4.106434 | 0.000916 | 0.0286   | -0.693619496 |
| 0610006I08RI | 0.198959 | 10.29162 | 3.766096 | 0.001839 | 0.043479 | -1.371975382 |
| JOSD2        | 0.198718 | 9.284611 | 3.683544 | 0.002179 | 4.82E-02 | -1.536754958 |
| ODZ3         | 0.198289 | 7.82894  | 4.50641  | 0.000408 | 0.017648 | 0.096532366  |
| PCGF5        | 0.19766  | 9.205501 | 4.174493 | 0.000798 | 0.026555 | -0.558457271 |
| OG9X         | 0.19743  | 7.473515 | 4.046258 | 0.001036 | 0.030614 | -0.813306921 |
| MAK16        | 0.196968 | 8.531099 | 3.732477 | 0.001971 | 0.044917 | -1.439084055 |
| F2R          | 0.196831 | 8.729049 | 4.589012 | 0.000346 | 0.016081 | 0.258195217  |
| AU040829     | 0.196249 | 12.2194  | 3.960123 | 0.001235 | 0.033592 | -0.984868461 |
| UHRF2        | 0.194994 | 9.131067 | 4.040307 | 0.001048 | 0.030902 | -0.825152075 |
| UPF3A        | 0.194585 | 7.99019  | 4.24641  | 0.000689 | 0.024407 | -0.415905937 |
| GAL3ST1      | 0.194094 | 8.251595 | 3.834015 | 0.001599 | 0.03953  | -1.236407086 |
| 1810014F10RI | 0.193164 | 8.532179 | 4.062571 | 0.001002 | 0.030118 | -0.78084607  |
| 2010106G01R  | 0.193009 | 7.769611 | 4.377084 | 0.000529 | 0.020835 | -0.157730374 |
| EXOSC7       | 0.19275  | 10.0605  | 3.726982 | 0.001993 | 0.045113 | -1.450052953 |
| SMARCD2      | 0.191961 | 8.141246 | 3.97962  | 0.001187 | 0.0327   | -0.94601346  |
| TXNRD2       | 0.191414 | 7.990596 | 4.366565 | 0.000541 | 0.020972 | -0.178468827 |
| OLFML2B      | 0.190586 | 8.523727 | 3.83781  | 0.001587 | 0.039316 | -1.228833516 |
| POP4         | 0.190069 | 10.13204 | 3.738855 | 0.001945 | 0.044677 | -1.42635253  |
| MMP24        | 0.189884 | 9.045771 | 3.727095 | 0.001993 | 4.51E-02 | -1.449826832 |
| GDPD1        | 0.189746 | 10.0911  | 3.902318 | 0.00139  | 0.03605  | -1.100128501 |
| VAPB         | 0.187748 | 9.065473 | 4.381768 | 0.000524 | 0.020835 | -0.148499461 |
| MYO5B        | 0.187476 | 7.458379 | 4.174414 | 0.000798 | 0.026555 | -0.558613729 |
| ELOVL6       | 0.186535 | 9.634029 | 4.160441 | 0.000821 | 0.026896 | -0.586345159 |
| MYL4         | 0.186122 | 10.89938 | 4.455048 | 0.000452 | 0.01872  | -0.004287915 |
| DDX5         | 0.185812 | 7.667202 | 4.277918 | 0.000647 | 0.023688 | -0.353550429 |
| INPP4B       | 0.185347 | 7.602162 | 4.280675 | 0.000643 | 0.023663 | -0.34809586  |
| TRIT1        | 0.185294 | 8.233818 | 3.980139 | 0.001186 | 0.0327   | -0.944979857 |
| CHCHD1       | 0.18521  | 12.02609 | 4.452413 | 0.000455 | 0.018746 | -0.009465692 |
| 6720458F09RI | 0.184949 | 9.604516 | 4.193383 | 0.000768 | 0.026297 | -0.520985071 |
| C030011O14R  | 0.179378 | 9.295485 | 3.722803 | 0.00201  | 4.53E-02 | -1.458394177 |



|               |          |          |          |          |          |              |
|---------------|----------|----------|----------|----------|----------|--------------|
| SEMA3F        | 0.17886  | 7.856118 | 3.938464 | 0.001291 | 0.034669 | -1.028046258 |
| SFRS12        | 0.17836  | 7.526806 | 4.028112 | 0.001075 | 0.031278 | -0.849428591 |
| RALY          | 0.178158 | 9.379945 | 3.669676 | 0.002243 | 4.93E-02 | -1.56E+00    |
| FGF10         | 0.178013 | 8.106554 | 4.520763 | 0.000396 | 0.01735  | 0.124665871  |
| KCNQ2         | 0.177258 | 7.858577 | 3.983831 | 0.001177 | 0.032675 | -0.93762457  |
| 1500031L02RI  | 0.176826 | 11.11723 | 3.860512 | 0.001515 | 0.038062 | -1.18353258  |
| SLC38A5       | 0.175792 | 8.130117 | 4.247625 | 0.000688 | 0.024407 | -0.413499145 |
| GRIA1         | 0.175458 | 10.18257 | 3.831397 | 0.001608 | 3.97E-02 | -1.241632824 |
| USP1          | 0.174528 | 8.405441 | 4.183361 | 0.000783 | 0.026409 | -0.540863229 |
| BC002163      | 0.174241 | 11.47851 | 4.071408 | 0.000984 | 0.029921 | -0.76326668  |
| ENPP4         | 0.173828 | 8.486283 | 4.148963 | 0.00084  | 0.027277 | -0.609130586 |
| CHRM2         | 0.17319  | 7.520361 | 4.37746  | 0.000529 | 0.020835 | -0.156990155 |
| ABI2          | 0.172979 | 12.6459  | 3.748091 | 0.001908 | 0.044262 | -1.407917273 |
| YIF1B         | 0.172919 | 9.341596 | 3.80323  | 0.001704 | 0.040879 | -1.297852115 |
| RANBP1        | 0.172353 | 10.34559 | 3.759548 | 0.001864 | 0.043809 | -1.38504611  |
| 2410066E13RI  | 0.170714 | 7.828188 | 3.738244 | 0.001947 | 4.47E-02 | -1.43E+00    |
| TUBA1B        | 0.170311 | 14.65323 | 3.743959 | 0.001925 | 4.45E-02 | -1.416164997 |
| DUS4L         | 0.168994 | 8.419626 | 4.263645 | 0.000666 | 0.02389  | -0.381789503 |
| D16H22S680E   | 0.168793 | 11.92436 | 3.753033 | 0.001889 | 4.40E-02 | -1.398051509 |
| DHRS7B        | 0.165597 | 8.680331 | 4.076616 | 0.000973 | 0.029863 | -0.752906742 |
| C130090K23RI  | 0.16492  | 7.740552 | 4.223541 | 0.000722 | 0.025182 | -0.461202679 |
| DPM1          | 0.16478  | 8.642563 | 3.736782 | 0.001953 | 4.47E-02 | -1.430491946 |
| MUM1          | 0.157581 | 9.767936 | 3.829691 | 0.001614 | 0.039697 | -1.245037776 |
| KCNIP4        | 0.157462 | 7.685055 | 3.751659 | 0.001894 | 4.40E-02 | -1.400794818 |
| 1700021C14RI  | 0.157105 | 8.067149 | 3.809184 | 0.001683 | 0.040879 | -1.285966826 |
| FADS2         | 0.154378 | 7.895403 | 3.681204 | 0.00219  | 0.048248 | -1.541425102 |
| RPA3          | 0.151714 | 9.120194 | 3.774735 | 0.001807 | 0.042993 | -1.35473014  |
| TMED4         | 0.151416 | 9.128541 | 4.138337 | 0.000858 | 0.027677 | -0.630232223 |
| CACNG5        | 0.149619 | 7.778077 | 4.156818 | 0.000827 | 0.027011 | -0.593536574 |
| EMD           | 0.146751 | 8.159979 | 3.684152 | 0.002177 | 4.82E-02 | -1.535541696 |
| SLC44A1       | 0.143725 | 8.392265 | 3.75217  | 0.001892 | 0.044035 | -1.399773435 |
| RYR1          | -0.13433 | 7.694155 | -3.68983 | 0.002151 | 4.79E-02 | -1.524213018 |
| TLE1          | -0.14633 | 9.008041 | -3.6903  | 0.002149 | 4.79E-02 | -1.523271475 |
| TPD52L1       | -0.14809 | 8.029941 | -3.84202 | 0.001573 | 0.039254 | -1.22044065  |
| MAPK10        | -0.15248 | 8.063982 | -3.91709 | 0.001349 | 0.035498 | -1.07066527  |
| B2M           | -0.15586 | 11.03704 | -3.86981 | 0.001486 | 0.037432 | -1.164979153 |
| RGL1          | -0.15697 | 10.75633 | -3.72961 | 0.001982 | 4.51E-02 | -1.444810238 |
| THBD          | -0.16271 | 7.41851  | -3.68158 | 0.002188 | 0.048248 | -1.54066762  |
| CADM2         | -0.16343 | 8.689475 | -3.90639 | 0.001379 | 0.036016 | -1.092001597 |
| DAB2          | -0.16546 | 7.640299 | -3.92563 | 0.001325 | 3.52E-02 | -1.053644408 |
| TMEM85        | -0.166   | 11.62307 | -4.3079  | 0.000609 | 0.02299  | -0.294281511 |
| EHMT2         | -0.16628 | 9.184744 | -3.83881 | 0.001584 | 3.93E-02 | -1.226842601 |
| 5730410I19RII | -0.16686 | 9.275464 | -4.13107 | 0.000871 | 0.027776 | -0.644671241 |

|          |          |          |          |          |          |              |
|----------|----------|----------|----------|----------|----------|--------------|
| EMID2    | -0.17024 | 7.543926 | -3.80902 | 0.001684 | 0.040879 | -1.286299563 |
| SUPT5H   | -0.17099 | 9.746238 | -4.00199 | 0.001134 | 0.031904 | -0.901447036 |
| ANKRD6   | -0.17152 | 7.631742 | -4.23526 | 0.000705 | 0.024798 | -0.437989369 |
| RXFP3    | -0.17227 | 7.422516 | -3.91119 | 0.001365 | 0.035752 | -1.082440429 |
| CAPN2    | -0.17424 | 8.271079 | -4.1782  | 0.000792 | 0.026518 | -0.551095365 |
| ARF4     | -0.1759  | 7.33964  | -4.11494 | 0.0009   | 0.028446 | -0.676720596 |
| HSPA1A   | -0.17605 | 7.75233  | -4.29889 | 0.00062  | 0.023274 | -0.312083876 |
| CHFR     | -0.17669 | 9.261868 | -4.37416 | 0.000532 | 0.020835 | -0.163497525 |
| LRRTM3   | -0.17912 | 8.179193 | -3.92028 | 0.00134  | 3.54E-02 | -1.064306705 |
| CNPY3    | -0.18001 | 7.660573 | -3.77249 | 0.001815 | 0.043043 | -1.359220028 |
| IGFBP2   | -0.18049 | 7.749552 | -4.84899 | 0.000207 | 1.21E-02 | 0.762717888  |
| YWHAZ    | -0.18072 | 12.78527 | -3.77414 | 0.001809 | 4.30E-02 | -1.36E+00    |
| RASGRF1  | -0.18121 | 12.43773 | -4.61242 | 0.00033  | 0.015693 | 0.303896312  |
| GRSF1    | -0.18259 | 10.11151 | -3.80348 | 0.001703 | 0.040879 | -1.297345833 |
| SLC23A3  | -0.1839  | 7.441943 | -4.39848 | 0.000507 | 0.020338 | -0.1155646   |
| ARPP21   | -0.18391 | 12.3379  | -4.5616  | 0.000365 | 0.016688 | 0.204615945  |
| LINGO2   | -0.18397 | 8.577158 | -4.05227 | 0.001023 | 0.030411 | -0.80134453  |
| DLX2     | -0.18439 | 7.380128 | -3.948   | 0.001266 | 0.03426  | -1.009037741 |
| SEC14L1  | -0.18478 | 8.730405 | -4.48345 | 0.000427 | 0.018108 | 0.051496988  |
| BMPER    | -0.18595 | 8.153401 | -3.85771 | 0.001524 | 3.82E-02 | -1.189118705 |
| AK3      | -0.18726 | 9.791201 | -4.11107 | 0.000907 | 0.02855  | -0.684413753 |
| BC002230 | -0.18757 | 7.796825 | -3.69895 | 0.002111 | 4.72E-02 | -1.506008131 |
| ZNRF1    | -0.18828 | 8.790423 | -3.74127 | 0.001935 | 0.044677 | -1.421534161 |
| SULT1A1  | -0.18888 | 7.931959 | -4.7439  | 0.000254 | 0.013551 | 0.559604613  |
| ABHD6    | -0.18925 | 7.722196 | -4.26508 | 0.000664 | 0.02389  | -0.37894791  |
| TRPC3    | -0.18952 | 8.770999 | -3.73408 | 0.001964 | 0.044866 | -1.435885559 |
| CAMTA2   | -0.1915  | 12.5099  | -4.01663 | 0.0011   | 0.031467 | -0.872292537 |
| CRIP1    | -0.19168 | 8.346967 | -4.20665 | 0.000747 | 0.025681 | -0.494678841 |
| GNG4     | -0.19264 | 8.709831 | -4.2901  | 0.000631 | 0.023441 | -0.329464961 |
| BICD2    | -0.19496 | 9.32708  | -3.89066 | 0.001424 | 0.036474 | -1.123382384 |
| RILPL1   | -0.19541 | 9.735163 | -4.10876 | 0.000912 | 0.02855  | -0.689004707 |
| TTYH1    | -0.1955  | 10.85504 | -4.18702 | 0.000777 | 0.026409 | -0.533595437 |
| CXCL14   | -0.19562 | 8.932043 | -3.75525 | 0.001881 | 4.40E-02 | -1.393631492 |
| CDC42EP3 | -0.1958  | 9.189026 | -3.95143 | 0.001257 | 0.034107 | -1.002193431 |
| TAX1BP3  | -0.1973  | 8.556084 | -4.72036 | 0.000266 | 0.013852 | 0.513948956  |
| FUT8     | -0.19756 | 8.659682 | -4.69658 | 0.000279 | 0.0141   | 0.46777932   |
| CYR61    | -0.19762 | 7.222309 | -3.70232 | 0.002097 | 4.70E-02 | -1.499282757 |
| CLCN4-2  | -0.19828 | 8.232154 | -4.00859 | 0.001119 | 0.031731 | -0.888301493 |
| NPY      | -0.19942 | 11.02052 | -3.92334 | 0.001332 | 0.035222 | -1.058201346 |
| SCHIP1   | -0.20078 | 11.64477 | -3.8479  | 0.001555 | 0.038875 | -1.208704602 |
| SPAG5    | -0.20088 | 8.134456 | -4.17009 | 0.000805 | 0.026621 | -0.56720004  |
| CDH8     | -0.2013  | 8.211453 | -5.48283 | 6.08E-05 | 5.63E-03 | 1.960103674  |
| PRR13    | -0.20217 | 11.09519 | -4.52971 | 0.000389 | 0.017268 | 0.142193086  |

|              |          |          |          |          |          |              |
|--------------|----------|----------|----------|----------|----------|--------------|
| HIST1H2BN    | -0.20297 | 7.967064 | -4.85001 | 0.000206 | 0.012114 | 0.76468458   |
| GPC5         | -0.20337 | 8.91444  | -4.36883 | 0.000538 | 0.020953 | -0.17399968  |
| BMP1         | -0.20393 | 8.137301 | -5.30309 | 8.56E-05 | 0.007001 | 1.625737133  |
| EG328644     | -0.20653 | 8.233297 | -4.0562  | 0.001015 | 0.030257 | -0.79351307  |
| DKKL1        | -0.20786 | 8.274005 | -4.0871  | 0.000953 | 0.029575 | -0.732060754 |
| AMIGO1       | -0.20932 | 8.667317 | -4.29181 | 0.000629 | 0.023441 | -0.326069095 |
| E430002G05RI | -0.21199 | 8.412399 | -4.62999 | 0.000319 | 0.015481 | 0.338166812  |
| C130074G19R  | -0.21208 | 7.887178 | -4.5233  | 0.000394 | 0.01735  | 0.129641733  |
| IL6ST        | -0.2124  | 7.659632 | -3.82192 | 0.00164  | 4.01E-02 | -1.26053913  |
| SLC6A13      | -0.21313 | 7.414268 | -4.27507 | 0.00065  | 0.023688 | -0.359183188 |
| GJB2         | -0.21435 | 7.55037  | -5.26802 | 9.15E-05 | 0.007001 | 1.559990593  |
| ZFP238       | -0.21478 | 10.43949 | -4.20878 | 0.000744 | 0.025654 | -0.490466349 |
| RRN3         | -0.21561 | 8.707953 | -3.8227  | 0.001637 | 0.040148 | -1.258996916 |
| EFCAB1       | -0.21631 | 7.730321 | -4.43773 | 0.000468 | 0.019232 | -0.038328825 |
| DEDD2        | -0.21689 | 8.140133 | -3.76535 | 0.001842 | 0.043479 | -1.373471917 |
| 4930455C21RI | -0.21751 | 8.093514 | -4.59188 | 0.000344 | 0.01606  | 0.26380476   |
| SHFM1        | -0.21864 | 11.52601 | -3.72618 | 0.001996 | 0.045113 | -1.451663105 |
| KLHL7        | -0.21933 | 10.11401 | -5.1761  | 0.000109 | 0.008004 | 1.38694102   |
| PDSS1        | -0.21943 | 8.000255 | -4.05614 | 0.001015 | 0.030257 | -0.793642145 |
| LOC10004417  | -0.22007 | 8.509613 | -4.24957 | 0.000685 | 0.024407 | -0.409639138 |
| PTGES3       | -0.22079 | 9.397217 | -3.73858 | 0.001946 | 4.47E-02 | -1.426899088 |
| HSPA2        | -0.22192 | 10.32245 | -3.94136 | 0.001283 | 3.46E-02 | -1.022276437 |
| DAB2IP       | -0.22207 | 10.18955 | -4.70175 | 0.000276 | 0.014023 | 0.477814715  |
| INSM1        | -0.22364 | 7.671825 | -3.92503 | 0.001327 | 0.035189 | -1.054839905 |
| ZFP451       | -0.22387 | 8.409702 | -4.14998 | 0.000838 | 0.027277 | -0.607114244 |
| OGN          | -0.22452 | 7.387425 | -4.55294 | 0.000372 | 0.016781 | 0.187673857  |
| PAFAH1B1     | -0.227   | 9.107184 | -3.89489 | 0.001412 | 3.63E-02 | -1.114942554 |
| MAPRE3       | -0.2277  | 8.088653 | -4.26964 | 0.000658 | 0.023763 | -0.36992823  |
| FAM84A       | -0.22915 | 7.918033 | -4.005   | 0.001127 | 3.19E-02 | -0.895461588 |
| ACSBG1       | -0.2295  | 8.492413 | -4.72023 | 0.000266 | 0.013852 | 0.513701741  |
| CD83         | -0.22972 | 8.422298 | -4.07892 | 0.000969 | 0.029809 | -0.748317874 |
| RGS4         | -0.23027 | 12.45033 | -5.31111 | 8.43E-05 | 6.95E-03 | 1.640748418  |
| TOP2B        | -0.2321  | 7.583709 | -3.97973 | 0.001187 | 0.0327   | -0.945793711 |
| MEGF9        | -0.23274 | 9.484822 | -4.52008 | 0.000397 | 0.01735  | 0.123327535  |
| DLGAP2       | -0.23469 | 9.560601 | -5.43444 | 6.67E-05 | 6.01E-03 | 1.870507212  |
| FAM148C      | -0.23562 | 8.862439 | -3.89986 | 0.001397 | 0.036143 | -1.105022803 |
| HSP105       | -0.23709 | 11.51016 | -3.87435 | 0.001472 | 0.037263 | -1.155925333 |
| SLC2A13      | -0.23796 | 11.19407 | -4.32299 | 0.00059  | 0.022406 | -0.264457207 |
| COCH         | -0.23865 | 7.74143  | -4.61437 | 0.000329 | 0.015693 | 0.307703685  |
| ARHGAP20     | -0.23903 | 10.02217 | -4.65699 | 0.000302 | 0.014828 | 0.39077304   |
| SLC40A1      | -0.23914 | 8.859273 | -4.62837 | 0.00032  | 0.015481 | 0.335002836  |
| CPNE4        | -0.23922 | 10.03049 | -4.47194 | 0.000437 | 0.018239 | 0.028886513  |
| TIMP4        | -0.23931 | 8.305034 | -5.4183  | 6.87E-05 | 0.006095 | 1.840560961  |

|              |          |          |          |          |          |              |
|--------------|----------|----------|----------|----------|----------|--------------|
| FGF12        | -0.23946 | 9.618374 | -3.88762 | 0.001433 | 3.65E-02 | -1.129445164 |
| HPCA         | -0.24039 | 12.20839 | -4.67738 | 0.00029  | 0.014441 | 0.430445437  |
| PAM          | -0.24111 | 8.054158 | -4.1373  | 0.00086  | 0.027677 | -0.632294553 |
| ARCN1        | -0.2418  | 7.924603 | -4.79951 | 0.000228 | 0.012719 | 0.667240617  |
| COBL         | -0.24227 | 8.931042 | -3.98497 | 0.001174 | 0.032675 | -0.935363899 |
| TGFB2        | -0.24312 | 7.600033 | -4.35499 | 0.000553 | 0.02131  | -0.20129331  |
| SCCPDH       | -0.24478 | 11.79798 | -4.55247 | 0.000372 | 0.016781 | 0.186751508  |
| EVL          | -0.24499 | 10.05722 | -4.70246 | 0.000276 | 0.014023 | 0.479197533  |
| NECAB1       | -0.24668 | 8.96109  | -4.06428 | 0.000998 | 3.01E-02 | -0.777453528 |
| TPCN1        | -0.24669 | 10.05106 | -3.90437 | 0.001385 | 0.03605  | -1.096039192 |
| LOC10004612  | -0.24739 | 12.16889 | -4.02706 | 0.001077 | 3.13E-02 | -0.85152438  |
| VAT1L        | -0.25014 | 10.00021 | -3.80016 | 0.001715 | 0.041032 | -1.303978742 |
| APOE         | -0.25216 | 10.56576 | -3.97137 | 0.001207 | 0.033083 | -0.962445145 |
| ZFP36L1      | -0.2536  | 9.402585 | -4.93381 | 0.000175 | 1.09E-02 | 0.925786933  |
| PTPRB        | -0.25416 | 8.660836 | -4.2228  | 0.000723 | 0.025182 | -0.462680943 |
| FHOD3        | -0.25427 | 8.221549 | -3.76431 | 0.001846 | 4.35E-02 | -1.375547658 |
| RELN         | -0.25565 | 10.6203  | -4.99442 | 0.000155 | 0.01     | 1.041791457  |
| NRN1         | -0.2564  | 12.58454 | -5.2903  | 8.77E-05 | 0.007001 | 1.601780715  |
| SMARCC2      | -0.25769 | 9.053504 | -4.04883 | 0.00103  | 0.03054  | -0.808183339 |
| GPR37L1      | -0.25841 | 9.993285 | -5.15187 | 0.000114 | 0.008108 | 1.341144538  |
| PVRL3        | -0.25974 | 8.039421 | -6.54251 | 8.87E-06 | 1.56E-03 | 3.84E+00     |
| CDKN1C       | -0.26313 | 8.447607 | -5.78779 | 3.44E-05 | 0.003863 | 2.517272502  |
| TJP1         | -0.26357 | 8.397151 | -4.06855 | 0.00099  | 0.029924 | -0.768958387 |
| SYNGR1       | -0.26486 | 9.280637 | -4.70708 | 0.000273 | 1.40E-02 | 0.488166546  |
| RREB1        | -0.26653 | 8.059592 | -6.73215 | 6.39E-06 | 1.20E-03 | 4.156438497  |
| 2510009E07RI | -0.26701 | 9.425649 | -7.1203  | 3.31E-06 | 7.76E-04 | 4.791360819  |
| ALDOA        | -0.26745 | 12.53948 | -4.1225  | 0.000887 | 0.028179 | -0.661683926 |
| RBM28        | -0.2696  | 9.240326 | -4.54465 | 0.000378 | 0.016901 | 0.171453115  |
| RGS10        | -0.26984 | 9.908404 | -4.89022 | 0.000191 | 0.011582 | 0.84208477   |
| P2RY12       | -0.27    | 8.52596  | -4.24122 | 0.000697 | 0.024582 | -0.426189514 |
| SLC4A3       | -0.27051 | 9.234296 | -7.3457  | 2.28E-06 | 6.08E-04 | 5.149706293  |
| KRT12        | -0.27062 | 9.487761 | -5.73038 | 3.83E-05 | 4.08E-03 | 2.413384807  |
| LOC10004765  | -0.27098 | 10.44043 | -6.36923 | 1.20E-05 | 1.98E-03 | 3.54E+00     |
| LOC10004701  | -0.27161 | 8.987815 | -4.78413 | 0.000235 | 1.30E-02 | 0.637507891  |
| OSBP2        | -0.27259 | 9.051612 | -4.11666 | 0.000897 | 0.028431 | -0.67330287  |
| ITGB5        | -0.27323 | 8.32545  | -5.90502 | 2.77E-05 | 0.003364 | 2.72791823   |
| RASSF3       | -0.27538 | 8.629859 | -3.89865 | 0.001401 | 3.61E-02 | -1.107448033 |
| LOC10004885  | -0.27567 | 8.947436 | -3.8047  | 0.001699 | 0.040879 | -1.294915469 |
| CLSTN1       | -0.27573 | 10.08447 | -4.39437 | 0.000511 | 0.020429 | -0.123662251 |
| TYKI         | -0.27872 | 8.792128 | -4.87733 | 0.000195 | 0.011652 | 0.817292288  |
| SLC1A3       | -0.2791  | 12.60486 | -6.34182 | 1.26E-05 | 2.05E-03 | 3.50E+00     |
| 6030405A18RI | -0.28009 | 9.172804 | -4.88894 | 0.000191 | 0.011582 | 0.839630841  |
| NSFL1C       | -0.28024 | 9.604223 | -4.02626 | 0.001079 | 0.031278 | -0.853120508 |

|              |          |          |          |          |          |               |
|--------------|----------|----------|----------|----------|----------|---------------|
| RIMS3        | -0.28058 | 11.09785 | -4.01023 | 0.001115 | 0.031731 | -0.885038526  |
| EVC2         | -0.28202 | 8.157568 | -5.54067 | 5.45E-05 | 0.005369 | 2.066769937   |
| GPM6A        | -0.28224 | 10.32941 | -4.67401 | 0.000292 | 0.014469 | 0.423892618   |
| ATP1B2       | -0.28492 | 10.25857 | -4.7621  | 0.000245 | 0.013293 | 0.594871728   |
| CACNG3       | -0.28604 | 8.812613 | -5.50522 | 5.83E-05 | 0.005544 | 2.001441654   |
| SEPT9        | -0.28753 | 8.339702 | -5.15647 | 0.000113 | 0.0081   | 1.349849707   |
| PECI         | -0.2877  | 8.989299 | -4.32431 | 0.000589 | 0.022406 | -0.261856369  |
| TMEM32       | -0.28797 | 8.916324 | -4.82821 | 0.000215 | 1.23E-02 | 0.7226562     |
| RNF144A      | -0.28824 | 8.82717  | -4.81162 | 0.000222 | 0.012484 | 0.690635904   |
| GCNT2        | -0.2886  | 9.294167 | -5.32648 | 8.19E-05 | 6.92E-03 | 1.67E+00      |
| HSD11B1      | -0.28881 | 9.321022 | -7.44208 | 1.95E-06 | 5.42E-04 | 5.300638191   |
| ADCYAP1      | -0.28972 | 8.629429 | -4.51902 | 0.000398 | 0.01735  | 0.121241393   |
| RWDD4A       | -0.29031 | 8.637847 | -3.99191 | 0.001157 | 0.032357 | -0.921518154  |
| GLRX2        | -0.29107 | 8.893965 | -4.13118 | 0.000871 | 0.027776 | -0.6444449213 |
| PMPCB        | -0.29163 | 8.513254 | -4.3575  | 0.000551 | 0.02128  | -0.196348184  |
| ABAT         | -0.29226 | 10.5606  | -5.07079 | 0.000134 | 0.009003 | 1.187370071   |
| EGR2         | -0.29254 | 8.305679 | -7.48159 | 1.83E-06 | 5.22E-04 | 5.36E+00      |
| C1QL3        | -0.29391 | 8.877394 | -4.07285 | 0.000981 | 0.029919 | -0.760399551  |
| KIRREL3      | -0.29441 | 8.251422 | -4.32533 | 0.000587 | 0.022406 | -0.259845727  |
| GPM6B        | -0.29683 | 8.30149  | -4.2838  | 0.000639 | 0.023658 | -0.341908147  |
| KCTD3        | -0.29746 | 9.957426 | -4.18602 | 0.000779 | 0.026409 | -0.535590631  |
| EIF3K        | -0.29824 | 9.353701 | -3.87165 | 0.001481 | 0.037379 | -1.161299496  |
| 4931406C07RI | -0.29832 | 8.329672 | -6.00227 | 2.32E-05 | 2.95E-03 | 2.90116192    |
| RTN4RL1      | -0.29885 | 9.196549 | -4.10875 | 0.000912 | 0.02855  | -0.689023799  |
| RORA         | -0.30007 | 8.983488 | -5.05005 | 0.000139 | 9.31E-03 | 1.147913632   |
| B930076A02   | -0.30053 | 9.14238  | -6.10733 | 1.92E-05 | 2.56E-03 | 3.086753128   |
| KCNK2        | -0.3013  | 8.964489 | -4.18038 | 0.000788 | 0.026485 | -0.546774268  |
| 2810022L02RI | -0.30394 | 8.042042 | -5.27572 | 9.02E-05 | 7.00E-03 | 1.5744447641  |
| LUZP2        | -0.30598 | 10.792   | -4.92736 | 0.000177 | 0.010998 | 0.913402319   |
| RAD23B       | -0.30648 | 10.35507 | -4.73665 | 0.000258 | 0.013678 | 0.545545439   |
| PIGQ         | -0.3068  | 9.942993 | -4.47836 | 0.000432 | 0.018148 | 0.041492792   |
| SCG3         | -0.30835 | 11.00394 | -3.70484 | 0.002086 | 4.68E-02 | -1.49E+00     |
| IAP          | -0.30887 | 11.19885 | -4.81598 | 0.000221 | 0.012484 | 0.699041902   |
| A530082C11R  | -0.30998 | 8.569516 | -5.35127 | 7.81E-05 | 0.006699 | 1.715791546   |
| KPNB1        | -0.31131 | 10.22433 | -4.13469 | 0.000865 | 0.02774  | -0.637477403  |
| LOC10004446  | -0.31246 | 11.05575 | -4.02328 | 0.001085 | 0.031325 | -0.859058628  |
| CRHR1        | -0.31293 | 7.64078  | -5.07098 | 0.000134 | 0.009003 | 1.187737599   |
| C1QTNF4      | -0.3217  | 10.68126 | -5.27296 | 9.07E-05 | 0.007001 | 1.569256341   |
| DUSP6        | -0.32373 | 10.11331 | -6.32979 | 1.29E-05 | 2.05E-03 | 3.474319925   |
| IGF2         | -0.32392 | 9.499371 | -5.74503 | 3.72E-05 | 4.01E-03 | 2.439934501   |
| PDYN         | -0.32494 | 9.007365 | -6.73208 | 6.39E-06 | 1.20E-03 | 4.156331647   |
| TMCC2        | -0.32627 | 9.238876 | -5.57722 | 5.09E-05 | 0.00507  | 2.133946786   |
| DCN          | -0.32709 | 7.854345 | -7.75051 | 1.19E-06 | 3.97E-04 | 5.774428261   |

|               |          |          |          |          |          |              |
|---------------|----------|----------|----------|----------|----------|--------------|
| PRELP         | -0.3277  | 8.393626 | -6.64035 | 7.48E-06 | 1.36E-03 | 4.002957697  |
| VIP           | -0.32789 | 10.46507 | -5.96375 | 2.49E-05 | 3.06E-03 | 2.83E+00     |
| PLCH2         | -0.32925 | 9.267879 | -4.53326 | 0.000387 | 0.017218 | 0.149139101  |
| DDIT4L        | -0.32972 | 8.776336 | -7.5658  | 1.60E-06 | 4.68E-04 | 5.492357417  |
| NDRG2         | -0.33295 | 9.481645 | -5.09925 | 0.000127 | 0.008685 | 1.241444071  |
| FSTL4         | -0.33309 | 8.77555  | -6.14229 | 1.80E-05 | 2.44E-03 | 3.148138082  |
| NOL4          | -0.33933 | 9.808341 | -6.87444 | 5.01E-06 | 1.08E-03 | 4.39E+00     |
| CCK           | -0.3394  | 12.17367 | -7.01021 | 3.98E-06 | 9.00E-04 | 4.613577572  |
| SLC24A3       | -0.33973 | 11.68753 | -5.6696  | 4.28E-05 | 4.52E-03 | 2.302878381  |
| PRKAR1B       | -0.33984 | 10.75021 | -5.87017 | 2.96E-05 | 0.003428 | 2.665505296  |
| JAK1          | -0.34261 | 8.622206 | -4.2241  | 0.000721 | 0.025182 | -0.460098556 |
| SLC7A10       | -0.34271 | 8.636367 | -6.78985 | 5.78E-06 | 1.17E-03 | 4.252261818  |
| BHLHB5        | -0.34475 | 7.83986  | -3.97658 | 0.001194 | 0.032818 | -0.952071835 |
| 4933439C20RI  | -0.34492 | 10.97684 | -5.98912 | 2.38E-05 | 2.95E-03 | 2.87781004   |
| LOC10004604   | -0.34954 | 11.75974 | -4.18877 | 0.000775 | 0.026409 | -0.530131696 |
| SLC12A5       | -0.35146 | 8.211898 | -3.77968 | 0.001788 | 0.042699 | -1.344856969 |
| AI314180      | -0.35912 | 9.368344 | -3.9912  | 0.001159 | 0.032357 | -0.922940996 |
| CAR4          | -0.36107 | 8.937582 | -5.77703 | 3.51E-05 | 0.003899 | 2.497832012  |
| PKNOX2        | -0.36215 | 8.955686 | -7.95653 | 8.61E-07 | 3.36E-04 | 6.08E+00     |
| LOC10004540   | -0.36265 | 12.55801 | -7.26957 | 2.59E-06 | 6.65E-04 | 5.03E+00     |
| GUCY1B3       | -0.36436 | 9.216574 | -3.93692 | 0.001295 | 0.034691 | -1.031131543 |
| ARNTL         | -0.36593 | 8.824861 | -6.27313 | 1.43E-05 | 2.10E-03 | 3.376306612  |
| FAM134A       | -0.36622 | 10.51222 | -4.8491  | 0.000207 | 0.012114 | 0.762939272  |
| UBE2J1        | -0.36768 | 8.766111 | -5.26887 | 9.14E-05 | 7.00E-03 | 1.561583315  |
| VGFB          | -0.36772 | 11.799   | -8.09483 | 6.95E-07 | 2.82E-04 | 6.287116077  |
| BHLHB2        | -0.37512 | 11.29105 | -4.83981 | 0.00021  | 0.012267 | 0.745022998  |
| S100B         | -0.37704 | 7.766454 | -7.72363 | 1.24E-06 | 3.97E-04 | 5.73E+00     |
| SLC39A10      | -0.38035 | 9.329431 | -3.92528 | 0.001326 | 0.035189 | -1.054343403 |
| HKDC1         | -0.38313 | 8.32328  | -6.78244 | 5.86E-06 | 0.001166 | 4.239991041  |
| EGR4          | -0.38704 | 10.09944 | -5.53681 | 5.49E-05 | 5.37E-03 | 2.05967334   |
| NLGN1         | -0.38758 | 8.141828 | -5.23886 | 9.68E-05 | 0.007298 | 1.505205019  |
| SLC13A4       | -0.3881  | 7.609667 | -8.1569  | 6.31E-07 | 2.68E-04 | 6.38E+00     |
| LOC10004853   | -0.39297 | 8.460216 | -5.27421 | 9.05E-05 | 7.00E-03 | 1.571605686  |
| IDH2          | -0.41352 | 9.18773  | -4.88619 | 0.000192 | 0.011582 | 0.834340148  |
| GJB6          | -0.42057 | 10.75613 | -7.65179 | 1.39E-06 | 4.32E-04 | 5.624296216  |
| TRIM37        | -0.43837 | 11.01737 | -3.75484 | 0.001882 | 4.40E-02 | -1.394449515 |
| 1300001I01RII | -0.44782 | 9.018701 | -5.89086 | 2.85E-05 | 0.003413 | 2.702580447  |
| CPNE9         | -0.45002 | 10.14747 | -8.49778 | 3.77E-07 | 1.81E-04 | 6.865850547  |
| FOS           | -0.45558 | 9.766477 | -9.42288 | 9.97E-08 | 6.57E-05 | 8.11E+00     |
| STARD8        | -0.45966 | 8.988055 | -11.1823 | 1.01E-08 | 1.21E-05 | 1.02E+01     |
| ABCC10        | -0.46106 | 7.645496 | -5.49058 | 5.99E-05 | 5.60E-03 | 1.97442485   |
| MAP2K1        | -0.4638  | 9.565388 | -4.82807 | 0.000215 | 0.012349 | 0.722373419  |
| HUWE1         | -0.46833 | 9.578061 | -4.29108 | 0.00063  | 0.023441 | -0.327520066 |

|          |          |          |          |          |          |              |
|----------|----------|----------|----------|----------|----------|--------------|
| NPAS4    | -0.47232 | 8.183955 | -9.95446 | 4.84E-08 | 3.93E-05 | 8.78E+00     |
| MARCKSL1 | -0.47788 | 8.354413 | -8.71578 | 2.73E-07 | 1.37E-04 | 7.17E+00     |
| R3HDM2   | -0.48874 | 10.63485 | -6.3232  | 1.30E-05 | 2.05E-03 | 3.462940906  |
| WFS1     | -0.48957 | 8.924659 | -8.8721  | 2.18E-07 | 1.17E-04 | 7.38E+00     |
| XLR4A    | -0.49743 | 8.818481 | -10.1084 | 3.95E-08 | 3.47E-05 | 8.965742642  |
| DUSP1    | -0.49921 | 10.59118 | -8.85849 | 2.22E-07 | 1.17E-04 | 7.37E+00     |
| SETD3    | -0.50505 | 9.387763 | -4.46969 | 0.000439 | 0.018249 | 0.024479836  |
| DDX3X    | -0.51656 | 9.461557 | -3.8393  | 0.001582 | 3.93E-02 | -1.225858492 |
| PTGDS    | -0.52181 | 9.929905 | -4.83044 | 0.000214 | 0.012349 | 0.726963173  |
| ARC      | -0.59131 | 10.64455 | -11.5867 | 6.24E-09 | 1.12E-05 | 1.06E+01     |
| PDZRN3   | -0.70155 | 9.217246 | -13.3037 | 9.18E-10 | 4.84E-06 | 1.23E+01     |
| CUX2     | -0.77341 | 9.049738 | -11.5337 | 6.65E-09 | 1.12E-05 | 1.06E+01     |
| TNNC1    | -0.78823 | 9.120732 | -12.1935 | 3.09E-09 | 8.51E-06 | 1.12E+01     |

## DEGs in resilient right mPFC

adj.P.Value < 0.05

DEGup 64

DEGdown 49

| Gene         | logFC    | AveExpr  | t        | P.Value   | adj.P.Val | B         |
|--------------|----------|----------|----------|-----------|-----------|-----------|
| CTGF         | 0.793198 | 10.55685 | 15.16918 | 1.43E-10  | 1.51E-06  | 1.30E+01  |
| HBA-A1       | 0.674836 | 12.60395 | 9.030629 | 1.73E-07  | 3.05E-04  | 7.3706657 |
| SLA          | 0.621823 | 8.890923 | 9.478749 | 9.23E-08  | 1.95E-04  | 7.92E+00  |
| RPRM         | 0.479928 | 11.03412 | 4.976091 | 0.0001611 | 2.43E-02  | 1.0942289 |
| PRSS35       | 0.459244 | 8.502893 | 6.867373 | 5.07E-06  | 2.55E-03  | 4.34E+00  |
| GBP2         | 0.44877  | 7.660565 | 10.03421 | 4.35E-08  | 1.15E-04  | 8.56E+00  |
| ADRA2A       | 0.432    | 8.965451 | 7.40402  | 2.07E-06  | 1.56E-03  | 5.16E+00  |
| SULF1        | 0.423781 | 8.768357 | 8.397036 | 4.39E-07  | 6.61E-04  | 6.55E+00  |
| RAI14        | 0.417988 | 8.747604 | 8.132651 | 6.55E-07  | 8.65E-04  | 6.20E+00  |
| TRF          | 0.411639 | 10.38794 | 5.275327 | 9.03E-05  | 1.54E-02  | 1.64E+00  |
| ZFPM2        | 0.405182 | 10.0211  | 7.191938 | 2.94E-06  | 1.82E-03  | 4.84E+00  |
| COL6A1       | 0.384902 | 9.225453 | 7.757314 | 1.18E-06  | 1.13E-03  | 5.67E+00  |
| PRR18        | 0.38442  | 10.29879 | 4.780717 | 0.0002364 | 3.04E-02  | 7.30E-01  |
| SEMA5A       | 0.380602 | 9.76898  | 6.9653   | 4.29E-06  | 2.38E-03  | 4.4898588 |
| MOG          | 0.377715 | 8.901772 | 7.765192 | 1.16E-06  | 1.13E-03  | 5.68E+00  |
| SPSB1        | 0.374721 | 9.264227 | 5.869069 | 2.96E-05  | 8.20E-03  | 2.69E+00  |
| LOC100047583 | 0.368707 | 9.874884 | 5.987692 | 2.38E-05  | 6.99E-03  | 2.90E+00  |
| GLRA2        | 0.353871 | 9.669872 | 4.824535 | 0.0002168 | 2.82E-02  | 0.8120262 |
| TLE4         | 0.352836 | 10.51575 | 7.411529 | 2.05E-06  | 1.56E-03  | 5.17E+00  |
| FA2H         | 0.348365 | 10.11226 | 6.125464 | 1.86E-05  | 6.13E-03  | 3.13E+00  |
| AHI1         | 0.345968 | 10.57708 | 5.240892 | 9.64E-05  | 1.57E-02  | 1.580229  |
| DPYSL5       | 0.345821 | 7.951066 | 6.517178 | 9.27E-06  | 3.81E-03  | 3.78E+00  |
| IGTP         | 0.3445   | 7.656577 | 7.488651 | 1.81E-06  | 1.56E-03  | 5.28E+00  |
| RGS9         | 0.341862 | 8.980841 | 5.400942 | 7.10E-05  | 1.41E-02  | 1.87E+00  |
| ENSMUSG000C  | 0.337438 | 7.882982 | 7.270813 | 2.58E-06  | 1.81E-03  | 4.96E+00  |
| D3BWG0562E   | 0.331868 | 9.785591 | 5.572251 | 5.14E-05  | 1.18E-02  | 2.17E+00  |
| ASAH3L       | 0.325028 | 7.969307 | 4.862713 | 0.0002011 | 2.76E-02  | 0.8833785 |
| CNTNAP4      | 0.319261 | 9.846148 | 5.259127 | 9.31E-05  | 1.56E-02  | 1.613348  |
| EVI2A        | 0.317289 | 8.523316 | 5.30804  | 8.48E-05  | 1.52E-02  | 1.7019579 |
| IPO13        | 0.317218 | 9.75607  | 4.920577 | 0.0001795 | 2.57E-02  | 0.9911888 |
| SGK1         | 0.31711  | 11.44792 | 6.506418 | 9.44E-06  | 3.81E-03  | 3.76E+00  |
| NTSR1        | 0.316493 | 8.087294 | 4.607191 | 0.0003336 | 3.71E-02  | 4.03E-01  |
| DRD1A        | 0.315728 | 8.898292 | 5.287474 | 8.82E-05  | 1.53E-02  | 1.6647425 |
| MOBP         | 0.314054 | 9.052363 | 6.54431  | 8.84E-06  | 3.81E-03  | 3.82E+00  |
| CDH13        | 0.310637 | 8.439697 | 7.015229 | 3.95E-06  | 2.31E-03  | 4.57E+00  |
| ANLN         | 0.306406 | 8.280857 | 5.392629 | 7.22E-05  | 1.41E-02  | 1.85E+00  |
| D12ERTD647E  | 0.303653 | 9.969361 | 6.912619 | 4.69E-06  | 2.48E-03  | 4.4078856 |



|               |          |          |          |           |          |            |
|---------------|----------|----------|----------|-----------|----------|------------|
| RASL10A       | 0.301617 | 9.588202 | 4.668676 | 0.0002952 | 3.47E-02 | 5.19E-01   |
| SMAD3         | 0.299845 | 8.05612  | 4.611293 | 0.0003309 | 3.71E-02 | 0.4104161  |
| PPP1R1B       | 0.29915  | 8.97316  | 5.544954 | 5.41E-05  | 1.19E-02 | 2.1263196  |
| CLDN11        | 0.293039 | 12.82258 | 4.95881  | 0.0001666 | 2.48E-02 | 1.0621944  |
| GAB1          | 0.291293 | 9.003693 | 6.226742 | 1.55E-05  | 5.64E-03 | 3.30E+00   |
| IIGP2         | 0.291198 | 7.653213 | 5.672631 | 4.26E-05  | 1.02E-02 | 2.3516042  |
| LITAF         | 0.288049 | 9.402568 | 5.248401 | 9.51E-05  | 1.57E-02 | 1.593874   |
| RUNX1T1       | 0.28172  | 9.781986 | 5.151164 | 0.0001146 | 1.83E-02 | 1.4165947  |
| TPR           | 0.278892 | 9.902227 | 4.918763 | 0.0001802 | 2.57E-02 | 0.9878152  |
| DDAH1         | 0.276746 | 11.28131 | 4.437087 | 0.000469  | 4.66E-02 | 7.88E-02   |
| RNF113A2      | 0.265555 | 9.034929 | 4.592094 | 0.0003438 | 3.71E-02 | 3.74E-01   |
| HIST1H2AH     | 0.260939 | 7.875641 | 5.596446 | 4.91E-05  | 1.15E-02 | 2.22E+00   |
| PRR7          | 0.253737 | 9.384036 | 4.596214 | 0.000341  | 3.71E-02 | 0.3818286  |
| COL5A1        | 0.24714  | 8.052943 | 5.896618 | 2.82E-05  | 8.03E-03 | 2.7408698  |
| PADI6         | 0.246058 | 7.451042 | 4.591554 | 0.0003442 | 3.71E-02 | 0.3729891  |
| MMP24         | 0.245668 | 9.045771 | 4.401896 | 0.0005034 | 4.83E-02 | 1.14E-02   |
| PACRG         | 0.239371 | 9.414803 | 4.724902 | 0.000264  | 3.24E-02 | 0.6250148  |
| MID1          | 0.238843 | 7.855269 | 5.510788 | 5.77E-05  | 1.24E-02 | 2.0656249  |
| LOC100041725  | 0.228751 | 11.64068 | 4.483527 | 0.0004272 | 4.33E-02 | 1.67E-01   |
| NMRAL1        | 0.22846  | 8.267957 | 4.715776 | 0.0002688 | 3.26E-02 | 0.607828   |
| CALCA         | 0.226201 | 7.57042  | 4.539704 | 0.0003817 | 4.03E-02 | 0.2744917  |
| GBP3          | 0.219568 | 7.725706 | 4.522523 | 0.0003951 | 4.09E-02 | 2.42E-01   |
| CARHSP1       | 0.211707 | 8.668882 | 4.642733 | 0.0003108 | 3.60E-02 | 0.4699414  |
| RAMP3         | 0.20624  | 8.392446 | 4.433141 | 0.0004727 | 4.66E-02 | 0.0712353  |
| EG434858      | 0.204093 | 8.69901  | 4.604411 | 0.0003354 | 3.71E-02 | 0.3973715  |
| SLCO2B1       | 0.2036   | 8.822654 | 4.425724 | 0.0004798 | 4.69E-02 | 5.70E-02   |
| CACNG5        | 0.184057 | 7.778077 | 4.668061 | 0.0002955 | 3.47E-02 | 5.18E-01   |
| SLC4A3        | -0.18289 | 9.234296 | -4.53358 | 0.0003864 | 4.04E-02 | 2.63E-01   |
| BC048546      | -0.19359 | 9.075915 | -4.50581 | 0.0004085 | 4.19E-02 | 2.10E-01   |
| CAPN2         | -0.20012 | 8.271079 | -4.38063 | 0.0005254 | 4.91E-02 | -0.0293031 |
| AI593442      | -0.21654 | 9.778111 | -4.39159 | 0.0005139 | 4.89E-02 | -8.31E-03  |
| LOC100047651  | -0.22573 | 10.44043 | -4.84336 | 0.0002089 | 2.82E-02 | 8.47E-01   |
| 2510009E07RIH | -0.22802 | 9.425649 | -5.55083 | 5.35E-05  | 1.19E-02 | 2.1367459  |
| COX7A1        | -0.22956 | 7.769965 | -4.76359 | 0.0002445 | 3.07E-02 | 0.6977648  |
| DDIT4L        | -0.23047 | 8.776336 | -4.82748 | 0.0002156 | 2.82E-02 | 0.8175417  |
| HR            | -0.24245 | 8.828072 | -5.14171 | 0.0001167 | 1.84E-02 | 1.40E+00   |
| PTN           | -0.24949 | 11.83842 | -4.45239 | 0.0004548 | 4.57E-02 | 0.1080362  |
| SYTL2         | -0.25312 | 10.0444  | -4.53996 | 0.0003815 | 4.03E-02 | 2.75E-01   |
| KRT12         | -0.27379 | 9.487761 | -5.2925  | 8.74E-05  | 1.53E-02 | 1.67E+00   |
| TRPC3         | -0.27393 | 8.770999 | -4.92701 | 0.0001773 | 2.57E-02 | 1.0031426  |
| GPC5          | -0.27404 | 8.91444  | -5.37398 | 7.48E-05  | 1.41E-02 | 1.8208829  |
| CAMK2A        | -0.27575 | 11.23575 | -5.67473 | 4.24E-05  | 1.02E-02 | 2.36E+00   |
| PPM1L         | -0.27996 | 10.43274 | -5.39567 | 7.18E-05  | 1.41E-02 | 1.86E+00   |

|              |          |          |          |           |          |           |
|--------------|----------|----------|----------|-----------|----------|-----------|
| GRSF1        | -0.28259 | 10.11151 | -5.3737  | 7.48E-05  | 1.41E-02 | 1.8203693 |
| FOS          | -0.28386 | 9.766477 | -5.35968 | 7.68E-05  | 1.42E-02 | 1.795152  |
| ATP1B2       | -0.28706 | 10.25857 | -4.37991 | 0.0005262 | 4.91E-02 | -3.07E-02 |
| ARHGAP20     | -0.28788 | 10.02217 | -5.12008 | 0.0001217 | 1.89E-02 | 1.359649  |
| STARD8       | -0.2989  | 8.988055 | -6.63775 | 7.51E-06  | 3.60E-03 | 3.97E+00  |
| NRN1         | -0.3019  | 12.58454 | -5.6862  | 4.15E-05  | 1.02E-02 | 2.38E+00  |
| FAM84A       | -0.30251 | 7.918033 | -4.82638 | 0.000216  | 2.82E-02 | 0.8154756 |
| P2RY12       | -0.30706 | 8.52596  | -4.40317 | 0.0005021 | 4.83E-02 | 1.39E-02  |
| LOC100047834 | -0.31183 | 12.44281 | -5.85638 | 3.03E-05  | 8.20E-03 | 2.6715144 |
| SLC24A3      | -0.31287 | 11.68753 | -4.7665  | 0.0002431 | 3.07E-02 | 0.7032398 |
| GJB6         | -0.32377 | 10.75613 | -5.37736 | 7.43E-05  | 1.41E-02 | 1.8269659 |
| HAPLN4       | -0.33218 | 9.550447 | -6.09826 | 1.95E-05  | 6.24E-03 | 3.08E+00  |
| NDRG2        | -0.33457 | 9.481645 | -4.67759 | 0.00029   | 3.47E-02 | 0.5358206 |
| FSTL4        | -0.33696 | 8.77555  | -5.67222 | 4.26E-05  | 1.02E-02 | 2.35E+00  |
| SORL1        | -0.34073 | 11.37858 | -5.04561 | 0.0001407 | 2.15E-02 | 1.22272   |
| CLCN4-2      | -0.34105 | 8.232154 | -6.29416 | 1.37E-05  | 5.18E-03 | 3.4125893 |
| NPY          | -0.34329 | 11.02052 | -6.16543 | 1.73E-05  | 5.89E-03 | 3.20E+00  |
| SCN4B        | -0.34469 | 9.653842 | -5.40156 | 7.10E-05  | 1.41E-02 | 1.87E+00  |
| RORA         | -0.34684 | 8.983488 | -5.32865 | 8.15E-05  | 1.48E-02 | 1.7391921 |
| PVALB        | -0.347   | 11.5717  | -4.61925 | 0.0003257 | 3.71E-02 | 0.425486  |
| CPNE9        | -0.35127 | 10.14747 | -6.05526 | 2.11E-05  | 6.55E-03 | 3.01E+00  |
| ARC          | -0.36275 | 10.64455 | -6.48872 | 9.74E-06  | 3.81E-03 | 3.73E+00  |
| SLC7A10      | -0.36398 | 8.636367 | -6.58293 | 8.26E-06  | 3.79E-03 | 3.88E+00  |
| RGS10        | -0.37352 | 9.908404 | -6.1793  | 1.69E-05  | 5.89E-03 | 3.22E+00  |
| LOC100046841 | -0.39754 | 8.855368 | -4.7525  | 0.00025   | 3.10E-02 | 0.6769309 |
| PDZRN3       | -0.41786 | 9.217246 | -7.23367 | 2.74E-06  | 1.81E-03 | 4.90E+00  |
| SCN1A        | -0.43243 | 10.25208 | -5.98921 | 2.38E-05  | 6.99E-03 | 2.8995337 |
| GLRX2        | -0.4414  | 8.893965 | -5.719   | 3.91E-05  | 1.02E-02 | 2.4328132 |
| HSD11B1      | -0.45154 | 9.321022 | -10.6215 | 2.03E-08  | 7.16E-05 | 9.19E+00  |
| SRR          | -0.45635 | 9.461644 | -4.86224 | 0.0002013 | 2.76E-02 | 0.8824878 |
| DUSP1        | -0.4823  | 10.59118 | -7.81277 | 1.08E-06  | 1.13E-03 | 5.75E+00  |
| MAP2K1       | -0.51183 | 9.565388 | -4.86385 | 0.0002007 | 2.76E-02 | 0.885508  |
| NPAS4        | -0.66471 | 8.183955 | -12.7887 | 1.59E-09  | 8.42E-06 | 1.12E+01  |
