# Supplementary material for: Molecular laterality encodes stress susceptibility in the medial prefrontal cortex
Source: PubMed Central journal article supplement (PMC8201740; doi:10.1186/s13041-021-00802-w), 2021-06-14
Supplement: 13041_2021_802_MOESM4_ESM.pdf [file 13041_2021_802_MOESM4_ESM.pdf]

**Supplementary table 2**

List of 526 DEGs with FDR adjusted *p*-value cutoffs of 0.05 corresponding to genes presented in heatmap format in Figure 1b according to their log<sub>2</sub> L/R values.

**Heatmap****Adj.P.Val < 0.05 (n=526)**

| Gene      | Log2(L/R) |          |          |
|-----------|-----------|----------|----------|
|           | SI_vs_Sr  | CI_vs_Cr | RI_vs_Rr |
| CUX2      | 0.93      | -0.06    | 0.17     |
| WFS1      | 0.83      | -0.12    | 0.24     |
| TNNC1     | 0.78      | -0.09    | -0.05    |
| STARD8    | 0.57      | -0.08    | -0.01    |
| CAR4      | 0.56      | -0.12    | -0.10    |
| PDZRN3    | 0.54      | -0.14    | -0.13    |
| VIP       | 0.52      | -0.01    | 0.01     |
| SLC13A4   | 0.52      | -0.17    | 0.09     |
| DDIT4L    | 0.51      | 0.01     | 0.04     |
| IGF2      | 0.51      | -0.21    | 0.09     |
| EGR2      | 0.50      | 0.08     | -0.11    |
| EVC2      | 0.49      | -0.02    | -0.03    |
| CDKN1C    | 0.49      | -0.10    | 0.10     |
| CPNE6     | 0.48      | -0.02    | -0.03    |
| EGR4      | 0.48      | 0.01     | 0.00     |
| CPNE4     | 0.47      | -0.06    | 0.01     |
| DCN       | 0.47      | -0.13    | -0.08    |
| LOC100041 | 0.45      | 0.00     | -0.08    |
| BHLHB2    | 0.43      | -0.10    | -0.15    |
| PVRL3     | 0.42      | -0.01    | 0.04     |
| TIAM1     | 0.41      | -0.00    | -0.05    |
| RILPL1    | 0.39      | -0.08    | 0.03     |
| BTBD3     | 0.38      | 0.17     | 0.21     |
| JUNB      | 0.38      | 0.02     | 0.01     |
| PALMD     | 0.38      | -0.03    | 0.06     |
| CPNE9     | 0.36      | -0.18    | -0.01    |
| DACT2     | 0.36      | -0.08    | -0.02    |
| LPL       | 0.36      | 0.01     | -0.10    |
| LOC100041 | 0.36      | -0.21    | -0.04    |
| C1QTNF4   | 0.36      | -0.26    | -0.03    |
| RELN      | 0.36      | -0.04    | -0.09    |

|           |      |       |       |
|-----------|------|-------|-------|
| RIMS3     | 0.36 | -0.15 | 0.18  |
| GRASP     | 0.35 | -0.04 | -0.03 |
| SPAG5     | 0.35 | -0.05 | -0.09 |
| MARCKSL1  | 0.35 | -0.08 | 0.05  |
| RREB1     | 0.35 | -0.04 | -0.02 |
| MGP       | 0.35 | -0.15 | 0.14  |
| PRELP     | 0.35 | -0.10 | 0.09  |
| HPCA      | 0.34 | -0.19 | 0.04  |
| OGN       | 0.34 | -0.11 | -0.01 |
| PDYN      | 0.34 | -0.08 | -0.10 |
| D8ERTD82  | 0.34 | 0.01  | -0.03 |
| IGSF3     | 0.33 | -0.04 | 0.02  |
| BHLHB5    | 0.33 | -0.07 | -0.15 |
| HBA-A1    | 0.33 | 0.05  | 0.03  |
| HKDC1     | 0.33 | -0.09 | -0.07 |
| GJB2      | 0.33 | -0.06 | -0.04 |
| GCNT2     | 0.33 | -0.03 | -0.06 |
| 6030405A  | 0.33 | -0.16 | -0.03 |
| EFCAB1    | 0.33 | -0.04 | 0.01  |
| LYZ       | 0.33 | -0.06 | 0.25  |
| FOSB      | 0.32 | -0.07 | 0.02  |
| GJB6      | 0.32 | -0.07 | -0.02 |
| SLC39A10  | 0.32 | -0.00 | -0.05 |
| SLC6A13   | 0.32 | -0.06 | -0.04 |
| CITED4    | 0.31 | -0.01 | 0.05  |
| FAM148C   | 0.31 | -0.26 | 0.06  |
| RTN4RL1   | 0.31 | -0.09 | -0.07 |
| LOC10004  | 0.30 | -0.16 | 0.00  |
| COCH      | 0.30 | 0.12  | -0.14 |
| FSTL4     | 0.30 | -0.15 | 0.13  |
| OTOF      | 0.30 | 0.02  | -0.05 |
| PLCH2     | 0.29 | -0.21 | -0.00 |
| 2510009EC | 0.29 | -0.12 | 0.08  |
| KRT12     | 0.29 | 0.01  | 0.01  |
| PKNOX2    | 0.29 | -0.30 | -0.21 |
| CACNG3    | 0.29 | -0.22 | -0.11 |
| SLC7A11   | 0.29 | -0.04 | 0.03  |
| BDNF      | 0.29 | -0.01 | 0.03  |
| ECHDC2    | 0.29 | -0.06 | 0.03  |
| MEF2C     | 0.29 | 0.17  | 0.03  |
| TLE1      | 0.28 | 0.01  | 0.08  |
| ZIC1      | 0.28 | 0.01  | -0.05 |
| FOS       | 0.28 | 0.08  | -0.05 |

|           |      |       |       |
|-----------|------|-------|-------|
| DUSP6     | 0.28 | 0.04  | -0.01 |
| PER2      | 0.27 | -0.03 | -0.11 |
| MFGE8     | 0.27 | -0.05 | 0.20  |
| PER1      | 0.27 | -0.05 | -0.15 |
| CDH8      | 0.27 | -0.02 | -0.02 |
| NBL1      | 0.27 | -0.14 | 0.12  |
| NEURL     | 0.27 | 0.03  | 0.03  |
| ARC       | 0.27 | 0.08  | 0.16  |
| GUCY1A3   | 0.27 | 0.00  | -0.03 |
| SERPINF1  | 0.27 | -0.00 | 0.06  |
| TGM2      | 0.27 | 0.04  | -0.07 |
| 1300013J1 | 0.27 | -0.10 | -0.03 |
| PTPRK     | 0.27 | -0.07 | -0.01 |
| ADCYAP1   | 0.27 | -0.12 | 0.10  |
| DBP       | 0.27 | 0.12  | -0.00 |
| SLC2A1    | 0.27 | -0.08 | -0.06 |
| FMO1      | 0.27 | -0.05 | 0.01  |
| LOC10004: | 0.27 | -0.03 | -0.19 |
| VGf       | 0.26 | -0.24 | -0.03 |
| VASN      | 0.26 | -0.01 | -0.07 |
| HAP1      | 0.26 | -0.10 | 0.07  |
| KCTD4     | 0.26 | -0.04 | 0.05  |
| 2810405KC | 0.26 | 0.02  | -0.05 |
| NR2F6     | 0.26 | -0.12 | 0.07  |
| LINGO2    | 0.26 | 0.02  | 0.04  |
| LOC10004  | 0.26 | -0.07 | 0.01  |
| HSPA2     | 0.26 | -0.10 | 0.01  |
| UACA      | 0.26 | -0.02 | 0.15  |
| PRKG2     | 0.26 | -0.02 | 0.09  |
| CHST1     | 0.26 | 0.03  | 0.01  |
| S100A11   | 0.25 | -0.08 | 0.02  |
| TMCC2     | 0.25 | -0.13 | -0.04 |
| ODZ4      | 0.25 | 0.12  | -0.09 |
| RANBP3L   | 0.25 | 0.03  | 0.02  |
| S100A8    | 0.25 | 0.14  | 0.36  |
| SLC4A3    | 0.25 | -0.12 | -0.03 |
| CCK       | 0.25 | -0.00 | -0.01 |
| ANXA11    | 0.25 | -0.12 | 0.01  |
| EPHX1     | 0.24 | -0.05 | 0.09  |
| ACSL5     | 0.24 | -0.10 | 0.14  |
| BMP1      | 0.24 | -0.12 | 0.01  |
| CACNA1H   | 0.24 | -0.12 | 0.05  |
| VAT1L     | 0.24 | -0.06 | -0.22 |

|           |      |       |       |
|-----------|------|-------|-------|
| FBF1      | 0.24 | -0.02 | 0.07  |
| WASF1     | 0.24 | 0.08  | -0.05 |
| ANKRD6    | 0.24 | -0.05 | 0.01  |
| DUSP1     | 0.23 | 0.16  | 0.19  |
| ZFP148    | 0.23 | -0.03 | 0.00  |
| SYNE1     | 0.23 | 0.13  | -0.03 |
| 2810022LC | 0.23 | -0.03 | 0.05  |
| CALB2     | 0.23 | -0.05 | 0.03  |
| FCHO1     | 0.23 | -0.02 | 0.07  |
| EFNA5     | 0.23 | 0.03  | 0.11  |
| PNCK      | 0.23 | -0.05 | -0.01 |
| DARC      | 0.23 | -0.02 | 0.08  |
| ARNTL     | 0.23 | -0.14 | -0.15 |
| CDH7      | 0.23 | 0.00  | -0.06 |
| OSBP2     | 0.23 | 0.03  | 0.02  |
| AUTS2     | 0.22 | 0.01  | 0.12  |
| C1QC      | 0.22 | -0.01 | -0.01 |
| CBLN4     | 0.22 | -0.07 | -0.07 |
| NPY1R     | 0.22 | -0.07 | -0.04 |
| DOCK4     | 0.22 | -0.02 | 0.02  |
| DUSP18    | 0.22 | -0.02 | 0.11  |
| ARSJ      | 0.22 | 0.03  | -0.02 |
| ACCN2     | 0.22 | -0.06 | -0.02 |
| CDC42EP4  | 0.22 | 0.04  | 0.10  |
| KLF2      | 0.22 | -0.08 | -0.01 |
| TRIB2     | 0.22 | -0.07 | 0.13  |
| CLCN2     | 0.22 | -0.08 | 0.01  |
| DKKL1     | 0.22 | 0.01  | -0.02 |
| HDAC11    | 0.22 | -0.02 | 0.17  |
| SCCPDH    | 0.22 | -0.00 | 0.05  |
| SLC26A4   | 0.22 | 0.01  | -0.03 |
| ITPKA     | 0.22 | -0.07 | 0.10  |
| RNF144A   | 0.22 | -0.03 | -0.16 |
| ANXA2     | 0.22 | -0.07 | -0.06 |
| SLC24A3   | 0.22 | -0.07 | -0.01 |
| SLC2A13   | 0.22 | -0.08 | -0.04 |
| RNF19A    | 0.22 | 0.03  | 0.04  |
| RBP1      | 0.21 | 0.08  | 0.03  |
| CASP1     | 0.21 | 0.01  | -0.01 |
| LYZ2      | 0.21 | 0.02  | 0.06  |
| PPM2C     | 0.21 | 0.08  | -0.07 |
| TNFRSF19  | 0.21 | 0.06  | 0.04  |
| DLK2      | 0.21 | -0.03 | -0.01 |

|           |      |       |       |
|-----------|------|-------|-------|
| SCHIP1    | 0.21 | -0.06 | -0.03 |
| 2310021P1 | 0.21 | -0.14 | -0.00 |
| ZDHHC14   | 0.21 | -0.08 | 0.00  |
| TRPC7     | 0.21 | -0.01 | 0.02  |
| BC067047  | 0.21 | 0.05  | 0.04  |
| ERDR1     | 0.21 | -0.03 | 0.04  |
| ZBTB7C    | 0.21 | -0.06 | -0.00 |
| COBL      | 0.21 | -0.01 | 0.10  |
| FHL1      | 0.21 | -0.08 | 0.04  |
| B930076A  | 0.21 | -0.26 | -0.03 |
| CD83      | 0.20 | -0.12 | -0.10 |
| SYT17     | 0.20 | 0.07  | -0.04 |
| CAMK2A    | 0.20 | -0.09 | 0.16  |
| MARCH4    | 0.20 | -0.05 | -0.01 |
| AKAP8L    | 0.20 | -0.15 | 0.06  |
| SERGEF    | 0.20 | -0.05 | 0.07  |
| PSME1     | 0.20 | -0.03 | 0.03  |
| 4933439C  | 0.20 | -0.24 | -0.01 |
| EXTL3     | 0.20 | -0.08 | 0.04  |
| B3GNT8    | 0.20 | 0.00  | 0.03  |
| NPTX2     | 0.20 | -0.07 | 0.13  |
| MYOC      | 0.20 | 0.02  | -0.05 |
| MEGF9     | 0.20 | 0.40  | 0.12  |
| IFITM3    | 0.20 | -0.07 | 0.22  |
| AW049604  | 0.20 | 0.04  | 0.04  |
| SLC1A3    | 0.20 | -0.03 | 0.09  |
| 5330439J0 | 0.20 | 0.03  | 0.07  |
| DNAJB1    | 0.20 | 0.02  | 0.16  |
| CAMTA2    | 0.19 | -0.06 | 0.08  |
| ADAMTSL2  | 0.19 | 0.02  | 0.01  |
| MMD       | 0.19 | -0.03 | -0.11 |
| ACTA2     | 0.19 | 0.00  | -0.08 |
| WNT4      | 0.19 | -0.07 | 0.01  |
| GM129     | 0.19 | 0.04  | -0.06 |
| HEY1      | 0.19 | 0.03  | -0.04 |
| LOC10004  | 0.19 | -0.02 | -0.03 |
| EXDL2     | 0.19 | -0.07 | -0.02 |
| MAPK4     | 0.19 | 0.05  | -0.02 |
| RHBDL3    | 0.19 | -0.08 | 0.04  |
| SYTL2     | 0.19 | -0.10 | 0.09  |
| 4930511J1 | 0.19 | -0.04 | 0.04  |
| BOK       | 0.19 | -0.06 | 0.06  |
| NAPEPLD   | 0.19 | -0.06 | -0.09 |

|          |      |       |       |
|----------|------|-------|-------|
| CGGBP1   | 0.19 | -0.01 | 0.02  |
| AGGF1    | 0.19 | 0.04  | -0.04 |
| RXFP3    | 0.19 | -0.11 | -0.08 |
| FKBP1A   | 0.19 | -0.02 | -0.08 |
| 4930544G | 0.18 | -0.04 | 0.05  |
| EHMT2    | 0.18 | -0.11 | 0.01  |
| ARPP21   | 0.18 | -0.03 | -0.01 |
| GTPBP6   | 0.18 | -0.08 | 0.02  |
| SEPT5    | 0.18 | -0.02 | 0.04  |
| IGFBP2   | 0.18 | 0.00  | 0.01  |
| OTOP2    | 0.18 | -0.01 | 0.04  |
| FAM13C   | 0.18 | -0.07 | -0.05 |
| GPR83    | 0.18 | 0.05  | 0.05  |
| AI593442 | 0.18 | -0.08 | 0.06  |
| BC030499 | 0.18 | 0.03  | 0.08  |
| PCTK1    | 0.18 | -0.00 | 0.14  |
| SULT1A1  | 0.18 | -0.09 | 0.01  |
| WDR60    | 0.18 | 0.03  | -0.13 |
| KHDRBS2  | 0.18 | 0.02  | -0.01 |
| NAV1     | 0.18 | -0.08 | -0.03 |
| TPD52L1  | 0.17 | -0.02 | 0.04  |
| CAMKK1   | 0.17 | -0.00 | -0.07 |
| UBQLN4   | 0.17 | -0.10 | 0.06  |
| YWHAZ    | 0.17 | -0.03 | 0.04  |
| NOL4     | 0.17 | -0.06 | -0.15 |
| MORN4    | 0.17 | -0.08 | 0.18  |
| MAPRE2   | 0.17 | -0.14 | -0.11 |
| BC064033 | 0.17 | 0.02  | 0.04  |
| ETS1     | 0.17 | -0.02 | -0.06 |
| ST8SIA2  | 0.17 | 0.03  | -0.08 |
| MID1     | 0.17 | -0.01 | -0.11 |
| JOSD1    | 0.17 | -0.01 | 0.17  |
| LOC10004 | 0.17 | 0.04  | 0.08  |
| CSF1R    | 0.17 | -0.04 | 0.07  |
| RYR1     | 0.17 | -0.07 | -0.05 |
| PROSAP1  | 0.17 | -0.11 | 0.10  |
| CYP1B1   | 0.17 | -0.02 | -0.03 |
| TCF4     | 0.17 | -0.01 | -0.06 |
| LOC10004 | 0.17 | -0.05 | 0.01  |
| NPM3-PS1 | 0.17 | 0.08  | 0.27  |
| MKX      | 0.17 | -0.02 | -0.06 |
| NGFRAP1  | 0.16 | 0.09  | 0.12  |
| RGS6     | 0.16 | 0.01  | -0.01 |

|           |      |       |       |
|-----------|------|-------|-------|
| BCL9L     | 0.16 | 0.02  | -0.02 |
| ZBTB8B    | 0.16 | -0.05 | 0.17  |
| TBC1D13   | 0.16 | -0.05 | 0.04  |
| H47       | 0.16 | -0.00 | 0.07  |
| COTL1     | 0.16 | -0.02 | 0.13  |
| HIST2H3B  | 0.16 | 0.06  | -0.04 |
| RGL1      | 0.16 | -0.09 | -0.03 |
| ZFP810    | 0.16 | -0.07 | 0.04  |
| HIST1H2AC | 0.16 | 0.04  | 0.19  |
| EFEMP2    | 0.16 | -0.01 | 0.00  |
| EMID2     | 0.16 | -0.10 | 0.04  |
| PDE4D     | 0.16 | -0.03 | 0.06  |
| CIB2      | 0.16 | -0.04 | 0.10  |
| CACNB3    | 0.15 | -0.09 | 0.03  |
| RGS4      | 0.15 | 0.05  | -0.08 |
| FBXL10    | 0.15 | -0.10 | -0.01 |
| AB112350  | 0.15 | 0.04  | -0.00 |
| AGFG1     | 0.15 | 0.06  | -0.01 |
| D930015E  | 0.15 | -0.08 | 0.10  |
| KCNK6     | 0.15 | -0.01 | 0.05  |
| ANXA3     | 0.15 | -0.02 | 0.01  |
| ARHGAP29  | 0.15 | -0.02 | -0.01 |
| OLFML3    | 0.15 | -0.06 | 0.12  |
| 633040611 | 0.15 | -0.04 | -0.13 |
| MT3       | 0.15 | 0.07  | 0.17  |
| SAP130    | 0.15 | -0.06 | -0.05 |
| THBD      | 0.15 | -0.10 | -0.07 |
| D930028F  | 0.14 | 0.00  | -0.02 |
| PRR13     | 0.14 | -0.08 | 0.01  |
| TCF19     | 0.14 | 0.03  | -0.02 |
| RASGRF2   | 0.14 | 0.05  | -0.06 |
| FLT1      | 0.14 | -0.20 | -0.14 |
| CHN2      | 0.14 | 0.03  | -0.15 |
| B2M       | 0.14 | -0.03 | 0.10  |
| S100A6    | 0.14 | -0.02 | 0.15  |
| HRASLS    | 0.14 | 0.10  | 0.08  |
| IGSF9     | 0.14 | -0.06 | -0.02 |
| SCN3B     | 0.14 | -0.04 | -0.00 |
| HSD11B1   | 0.14 | 0.03  | 0.11  |
| CPNE8     | 0.14 | 0.03  | -0.08 |
| CAMK1G    | 0.14 | -0.07 | 0.03  |
| SPHK1     | 0.14 | -0.02 | 0.07  |
| EPB4.9    | 0.14 | -0.06 | -0.03 |

|           |       |       |       |
|-----------|-------|-------|-------|
| RASGRF1   | 0.13  | -0.16 | -0.04 |
| ATG16L1   | 0.12  | 0.00  | 0.07  |
| FBXO32    | -0.13 | -0.00 | 0.02  |
| EG434858  | -0.14 | 0.01  | -0.13 |
| COL5A1    | -0.14 | -0.11 | 0.01  |
| DCLK1     | -0.14 | -0.11 | -0.05 |
| ADAMTSL4  | -0.14 | -0.01 | -0.13 |
| MIF4GD    | -0.14 | -0.07 | -0.02 |
| PHLDA3    | -0.14 | -0.03 | 0.04  |
| DIAP3     | -0.15 | 0.05  | 0.04  |
| INPPL1    | -0.15 | 0.02  | 0.04  |
| INPP4B    | -0.15 | -0.03 | -0.03 |
| FIGN      | -0.15 | 0.08  | -0.03 |
| FAM132B   | -0.15 | 0.02  | 0.01  |
| AB182283  | -0.15 | -0.01 | 0.02  |
| MTMR2     | -0.15 | -0.03 | -0.04 |
| ATP8B1    | -0.15 | 0.06  | -0.03 |
| CHRM2     | -0.15 | 0.10  | 0.06  |
| RAB5A     | -0.15 | 0.01  | -0.19 |
| SEMA3F    | -0.15 | -0.00 | 0.00  |
| MYO5B     | -0.15 | 0.13  | -0.13 |
| PIGZ      | -0.16 | 0.12  | 0.02  |
| HS3ST2    | -0.16 | -0.02 | 0.10  |
| SDK1      | -0.16 | 0.01  | 0.08  |
| ABCA8A    | -0.16 | -0.01 | -0.08 |
| ODZ3      | -0.16 | 0.14  | 0.02  |
| CLCN4-2   | -0.16 | -0.11 | 0.01  |
| EPHA7     | -0.16 | 0.01  | -0.13 |
| ELOVL6    | -0.16 | 0.10  | -0.08 |
| INSC      | -0.17 | 0.08  | 0.01  |
| WHRN      | -0.17 | 0.00  | 0.02  |
| HSD17B11  | -0.17 | -0.01 | -0.09 |
| TAC1      | -0.17 | -0.07 | 0.02  |
| FUT9      | -0.17 | 0.26  | -0.02 |
| LGI2      | -0.17 | 0.14  | 0.09  |
| THAP3     | -0.17 | 0.09  | 0.07  |
| STK4      | -0.17 | 0.07  | -0.01 |
| RAMP3     | -0.17 | -0.10 | 0.01  |
| SLC7A4    | -0.17 | -0.05 | -0.11 |
| CDC42EP2  | -0.17 | 0.09  | 0.09  |
| 6330503K2 | -0.18 | 0.01  | -0.06 |
| OG9X      | -0.18 | -0.02 | -0.01 |
| LMO3      | -0.18 | 0.05  | 0.08  |



|          |       |       |       |
|----------|-------|-------|-------|
| ELAVL2   | -0.18 | 0.07  | -0.06 |
| OLIG1    | -0.18 | 0.06  | -0.05 |
| RAB3B    | -0.18 | -0.06 | -0.06 |
| RYR3     | -0.18 | -0.18 | -0.10 |
| DYNC1LI2 | -0.18 | 0.02  | 0.01  |
| NFE2L3   | -0.18 | 0.12  | -0.09 |
| DCBLD1   | -0.18 | 0.07  | -0.02 |
| CHRNA5   | -0.18 | -0.02 | -0.05 |
| PIGP     | -0.18 | 0.02  | -0.14 |
| GRB7     | -0.18 | -0.06 | -0.01 |
| TMEM63A  | -0.18 | 0.04  | -0.03 |
| GRIK1    | -0.18 | 0.12  | 0.04  |
| PRDX3    | -0.18 | -0.02 | 0.05  |
| TTC19    | -0.18 | -0.02 | -0.06 |
| AI314976 | -0.18 | 0.02  | 0.01  |
| WNT2     | -0.18 | -0.09 | -0.00 |
| TRIM36   | -0.18 | -0.01 | -0.06 |
| ASAH2    | -0.18 | 0.02  | -0.07 |
| STAC2    | -0.18 | 0.12  | -0.06 |
| PRSS23   | -0.19 | -0.06 | -0.06 |
| OPRK1    | -0.19 | 0.11  | 0.12  |
| GFM1     | -0.19 | -0.06 | 0.03  |
| H2AFY    | -0.19 | -0.04 | -0.01 |
| TMEM19   | -0.19 | -0.01 | -0.06 |
| LRRTM2   | -0.19 | 0.08  | -0.08 |
| SPOP     | -0.19 | -0.11 | 0.05  |
| CADPS2   | -0.19 | 0.06  | -0.06 |
| OLFML2B  | -0.19 | -0.00 | -0.07 |
| TMEM38A  | -0.20 | -0.11 | -0.05 |
| TMEM125  | -0.20 | 0.01  | 0.10  |
| SERINC2  | -0.20 | -0.08 | -0.02 |
| RPH3A    | -0.20 | -0.10 | 0.05  |
| THSD7B   | -0.20 | -0.03 | 0.00  |
| SLC35F3  | -0.20 | 0.24  | 0.09  |
| CAR14    | -0.20 | -0.02 | -0.14 |
| IL11RA1  | -0.20 | 0.15  | -0.12 |
| NDST1    | -0.21 | -0.01 | 0.03  |
| CD47     | -0.21 | 0.05  | 0.07  |
| PLLP     | -0.21 | 0.12  | 0.20  |
| SAMD9L   | -0.21 | -0.00 | 0.17  |
| 1700019D | -0.21 | 0.05  | -0.02 |
| DBNDD2   | -0.21 | 0.14  | 0.10  |
| CD82     | -0.21 | 0.03  | -0.01 |

|           |       |       |       |
|-----------|-------|-------|-------|
| AGAP1     | -0.21 | 0.09  | -0.08 |
| ATP5F1    | -0.21 | 0.04  | -0.20 |
| FGF10     | -0.21 | 0.03  | 0.01  |
| HAPLN2    | -0.21 | -0.05 | 0.07  |
| RNMT      | -0.22 | 0.06  | -0.03 |
| REEP5     | -0.22 | -0.19 | 0.14  |
| ZYX       | -0.22 | -0.02 | 0.02  |
| ARSG      | -0.22 | 0.11  | 0.03  |
| AGPAT4    | -0.22 | 0.05  | 0.10  |
| ADORA1    | -0.22 | 0.02  | 0.02  |
| H2-T23    | -0.22 | 0.05  | -0.02 |
| PLEKHG3   | -0.22 | 0.00  | -0.01 |
| TTYH2     | -0.22 | 0.01  | 0.04  |
| PLXNB3    | -0.22 | 0.04  | 0.12  |
| SOX5      | -0.22 | 0.14  | 0.04  |
| EFHD1     | -0.22 | 0.10  | 0.00  |
| CPLX2     | -0.22 | 0.34  | 0.06  |
| PHLDB1    | -0.22 | -0.09 | -0.07 |
| PBRM1     | -0.22 | 0.08  | -0.13 |
| DOK4      | -0.22 | 0.03  | 0.05  |
| 3110035E1 | -0.22 | -0.07 | -0.07 |
| PRICKLE1  | -0.22 | -0.06 | -0.09 |
| NEU2      | -0.23 | -0.00 | -0.07 |
| NXPH2     | -0.23 | 0.01  | -0.02 |
| VSTM2B    | -0.23 | -0.01 | -0.11 |
| NETO1     | -0.23 | 0.27  | 0.06  |
| NMRAL1    | -0.23 | 0.10  | 0.02  |
| NIPA1     | -0.23 | 0.10  | -0.15 |
| ENSMUSG   | -0.23 | 0.10  | 0.02  |
| C130090K2 | -0.23 | 0.05  | -0.10 |
| KLF7      | -0.23 | -0.05 | -0.04 |
| INA       | -0.23 | -0.03 | 0.15  |
| TRIM59    | -0.23 | 0.08  | -0.13 |
| RAPGEF4   | -0.23 | -0.07 | -0.02 |
| PACS2     | -0.23 | -0.07 | 0.03  |
| SCD1      | -0.23 | -0.06 | 0.18  |
| GPR21     | -0.24 | 0.00  | 0.04  |
| TPBG      | -0.24 | 0.08  | -0.06 |
| RASL11B   | -0.24 | 0.08  | 0.12  |
| PADI6     | -0.24 | 0.00  | 0.04  |
| ANO4      | -0.24 | 0.20  | 0.07  |
| LY6G6E    | -0.24 | 0.05  | -0.05 |
| FOXN3     | -0.24 | 0.07  | 0.09  |

|          |       |       |       |
|----------|-------|-------|-------|
| LRRN1    | -0.24 | 0.07  | -0.12 |
| SLAIN1   | -0.24 | -0.03 | -0.05 |
| PPP1R14A | -0.24 | 0.10  | 0.00  |
| SKP1A    | -0.24 | -0.05 | -0.09 |
| PDLIM2   | -0.24 | 0.07  | 0.11  |
| KIF5A    | -0.25 | -0.06 | -0.01 |
| RELL1    | -0.25 | -0.04 | -0.12 |
| DDAH1    | -0.25 | 0.09  | 0.05  |
| UAP1     | -0.26 | -0.09 | -0.02 |
| HTR1F    | -0.26 | 0.17  | 0.02  |
| FAM134B  | -0.26 | 0.02  | -0.06 |
| PCBP2    | -0.26 | -0.10 | -0.04 |
| VANGL2   | -0.26 | 0.02  | -0.01 |
| OGFRL1   | -0.26 | 0.08  | -0.18 |
| NTSR1    | -0.26 | -0.04 | 0.02  |
| LRFN2    | -0.26 | 0.02  | -0.03 |
| OSBPL9   | -0.26 | -0.04 | -0.07 |
| ADAMTS4  | -0.26 | 0.03  | 0.08  |
| CARHSP1  | -0.26 | 0.10  | 0.03  |
| CRTAC1   | -0.27 | -0.10 | 0.06  |
| GADD45A  | -0.27 | 0.06  | -0.06 |
| GLTP     | -0.27 | 0.11  | -0.14 |
| D12ERTD6 | -0.27 | 0.07  | 0.00  |
| PIK3R3   | -0.27 | -0.00 | -0.05 |
| BCL11B   | -0.27 | 0.04  | 0.01  |
| LOC10004 | -0.28 | 0.02  | -0.09 |
| LOC10004 | -0.28 | 0.08  | -0.01 |
| DRD1A    | -0.28 | 0.11  | 0.03  |
| RIMS1    | -0.28 | 0.08  | 0.01  |
| RHOG     | -0.28 | -0.02 | 0.02  |
| KCNK13   | -0.29 | 0.15  | 0.03  |
| NFIB     | -0.29 | 0.07  | -0.06 |
| NOS1AP   | -0.29 | 0.21  | 0.04  |
| ITGB4    | -0.30 | 0.02  | 0.10  |
| NRIP3    | -0.30 | -0.07 | -0.06 |
| PLEKHA2  | -0.30 | 0.15  | -0.03 |
| GAB1     | -0.30 | 0.04  | -0.03 |
| IL33     | -0.31 | 0.07  | 0.08  |
| LPGAT1   | -0.31 | 0.25  | -0.10 |
| UNC5B    | -0.31 | 0.06  | -0.02 |
| PEBP1    | -0.31 | 0.00  | -0.04 |
| ADSSL1   | -0.31 | 0.05  | 0.11  |
| PDLIM1   | -0.31 | -0.04 | 0.05  |

|           |       |       |       |
|-----------|-------|-------|-------|
| FANCD2    | -0.31 | 0.02  | 0.13  |
| COL6A1    | -0.32 | -0.21 | -0.06 |
| NRP1      | -0.32 | 0.08  | 0.03  |
| LOC10004  | -0.32 | 0.00  | -0.12 |
| RGS9      | -0.32 | -0.07 | 0.12  |
| GAL3ST1   | -0.33 | 0.01  | 0.02  |
| MYL4      | -0.33 | 0.17  | 0.08  |
| LOC10004! | -0.33 | -0.02 | -0.00 |
| SST       | -0.33 | -0.03 | 0.04  |
| LASS2     | -0.33 | 0.09  | -0.01 |
| TMEM178   | -0.34 | -0.01 | 0.05  |
| GARNL3    | -0.34 | 0.06  | 0.03  |
| SLC44A1   | -0.34 | 0.08  | 0.13  |
| CNTNAP4   | -0.34 | -0.02 | -0.12 |
| KCNA1     | -0.34 | 0.19  | -0.01 |
| OPALIN    | -0.34 | 0.25  | 0.04  |
| ZDHHC9    | -0.34 | -0.04 | 0.11  |
| ARHGAP25  | -0.35 | 0.01  | 0.05  |
| LOC10004! | -0.36 | 0.10  | -0.08 |
| SC4MOL    | -0.36 | 0.09  | -0.10 |
| CNP       | -0.37 | 0.13  | 0.19  |
| NDRL      | -0.37 | -0.04 | -0.05 |
| PPP1R1B   | -0.37 | 0.07  | 0.05  |
| RAI14     | -0.38 | 0.04  | -0.06 |
| PLP1      | -0.38 | 0.10  | -0.02 |
| TLE4      | -0.38 | 0.16  | -0.11 |
| EVI2A     | -0.38 | 0.21  | -0.04 |
| LITAF     | -0.39 | 0.12  | 0.02  |
| OTX1      | -0.39 | -0.04 | 0.04  |
| IGSF21    | -0.41 | -0.05 | 0.00  |
| NEFM      | -0.42 | 0.16  | -0.15 |
| ISLR2     | -0.42 | -0.15 | -0.06 |
| EDG2      | -0.43 | -0.05 | 0.00  |
| ENPP6     | -0.43 | -0.06 | -0.01 |
| NDRG1     | -0.45 | 0.09  | -0.24 |
| CRYAB     | -0.46 | 0.13  | 0.02  |
| GLRA2     | -0.46 | 0.10  | -0.10 |
| SPSB1     | -0.46 | 0.02  | -0.01 |
| TSPAN2    | -0.46 | 0.14  | -0.12 |
| ANLN      | -0.46 | 0.11  | 0.08  |
| GJC2      | -0.48 | 0.15  | 0.03  |
| SLA       | -0.48 | 0.08  | -0.02 |
| QDPR      | -0.48 | 0.02  | -0.04 |

|         |       |      |       |
|---------|-------|------|-------|
| PLEKHB1 | -0.49 | 0.15 | 0.15  |
| ZFPM2   | -0.50 | 0.16 | -0.06 |
| SCN4B   | -0.51 | 0.05 | 0.22  |
| MOBP    | -0.52 | 0.12 | 0.02  |
| PRSS35  | -0.53 | 0.06 | -0.19 |
| UGT8A   | -0.53 | 0.12 | -0.07 |
| ADRA2A  | -0.53 | 0.03 | -0.06 |
| MAG     | -0.55 | 0.09 | 0.13  |
| MOG     | -0.57 | 0.18 | -0.03 |
| SULF1   | -0.57 | 0.22 | -0.05 |
| MBP     | -0.58 | 0.13 | 0.09  |
| SEMA5A  | -0.59 | 0.13 | 0.01  |
| MAL     | -0.59 | 0.17 | 0.14  |
| CLDN11  | -0.60 | 0.15 | 0.07  |
| FA2H    | -0.62 | 0.16 | 0.06  |
| BCAS1   | -0.68 | 0.11 | -0.01 |
| PRR18   | -0.68 | 0.22 | 0.09  |
| TRF     | -0.73 | 0.04 | -0.08 |
| RPRM    | -0.83 | 0.12 | 0.06  |
| CTGF    | -0.90 | 0.14 | 0.06  |
| GBP2    | 0.01  | 0.03 | 0.31  |
| ACTR1A  | 0.10  | 0.06 | 0.31  |
