# Supplementary material for: Molecular laterality encodes stress susceptibility in the medial prefrontal cortex
Source: PubMed Central journal article supplement (PMC8201740; doi:10.1186/s13041-021-00802-w), 2021-06-14
Supplement: 13041_2021_802_MOESM5_ESM.pdf [file 13041_2021_802_MOESM5_ESM.pdf]

**Supplementary table 3**

Comparison of averaged expression values of DEGs between the two mPFC hemispheres, presented in dot plot format in Figure 1c.

| <b>Gene</b> | <b>Sl</b> | <b>Sr</b> | <b>Rl</b> | <b>Rr</b> | <b>Cl</b> | <b>Cr</b> |
|-------------|-----------|-----------|-----------|-----------|-----------|-----------|
| HBA-A1      | 9004.78   | 7139.99   | 6573.75   | 6429.38   | 4170.86   | 4017.78   |
| WFS1        | 636.88    | 359.09    | 544.84    | 460.72    | 464.48    | 503.89    |
| MGP         | 397.86    | 312.33    | 360.79    | 327.52    | 300.51    | 332.58    |
| IGF2        | 859.29    | 602.64    | 776.51    | 733.07    | 653.42    | 753.84    |
| CPNE6       | 3457.90   | 2476.79   | 3022.96   | 3087.09   | 2665.37   | 2700.06   |
| FAM148C     | 513.18    | 412.98    | 505.94    | 486.39    | 407.04    | 486.81    |
| CDKN1C      | 400.88    | 286.08    | 399.14    | 372.37    | 319.54    | 343.45    |
| DACT2       | 420.47    | 328.05    | 337.05    | 341.63    | 335.79    | 354.51    |
| PROSAP1P    | 1545.09   | 1376.90   | 1424.80   | 1327.23   | 1234.86   | 1333.12   |
| CAR4        | 611.67    | 414.98    | 435.33    | 469.37    | 491.73    | 533.43    |
| LPL         | 659.81    | 514.82    | 562.84    | 603.48    | 530.25    | 525.96    |
| MFGE8       | 3093.09   | 2558.61   | 3089.21   | 2691.01   | 2493.19   | 2575.32   |
| LYZ         | 357.61    | 285.58    | 368.17    | 309.64    | 288.45    | 301.00    |
| CACNA1H     | 902.57    | 762.13    | 882.24    | 852.92    | 729.43    | 792.51    |
| COTL1       | 871.80    | 780.38    | 901.66    | 824.94    | 707.31    | 716.61    |
| SLC13A4     | 226.70    | 158.52    | 210.31    | 198.08    | 184.62    | 207.45    |
| HAP1        | 921.57    | 766.71    | 940.10    | 895.60    | 750.22    | 804.08    |
| C1QTNF4     | 1867.29   | 1456.32   | 1598.88   | 1627.79   | 1521.10   | 1823.07   |
| CPNE4       | 1235.79   | 891.01    | 1065.19   | 1056.10   | 1006.05   | 1050.61   |
| HPCA        | 5482.02   | 4333.23   | 4540.31   | 4422.58   | 4483.48   | 5117.07   |
| NR2F6       | 466.73    | 389.97    | 448.15    | 425.53    | 382.37    | 416.20    |
| ANXA2       | 337.74    | 290.59    | 313.36    | 326.63    | 276.52    | 290.87    |
| TIAM1       | 1561.88   | 1181.14   | 1354.32   | 1401.35   | 1280.84   | 1284.18   |
| IFITM3      | 439.24    | 382.89    | 503.33    | 432.82    | 360.61    | 379.23    |
| GRASP       | 807.56    | 632.01    | 697.29    | 710.88    | 663.14    | 681.49    |
| FOSB        | 380.44    | 303.86    | 334.97    | 331.33    | 312.79    | 329.33    |
| IGSF3       | 397.65    | 315.38    | 346.93    | 341.26    | 327.59    | 335.90    |
| PNCK        | 747.86    | 636.53    | 699.76    | 705.28    | 617.07    | 638.44    |
| ECHDC2      | 394.91    | 323.20    | 359.44    | 351.50    | 326.32    | 341.34    |
| RILPL1      | 991.23    | 754.84    | 852.88    | 837.43    | 819.39    | 864.34    |
| DCN         | 267.53    | 193.32    | 230.77    | 243.27    | 222.26    | 242.52    |
| S100A11     | 270.78    | 227.03    | 256.30    | 253.60    | 225.61    | 237.69    |
| ACTR1A      | 2008.71   | 1879.70   | 2038.58   | 1646.05   | 1673.46   | 1608.71   |
| CACNB3      | 544.65    | 489.05    | 522.69    | 512.73    | 453.85    | 482.20    |
| ITPKA       | 2665.16   | 2291.78   | 2239.04   | 2090.63   | 2225.62   | 2334.75   |
| FCHO1       | 997.29    | 846.82    | 935.30    | 892.29    | 832.22    | 843.72    |

|           |         |         |         |         |         |         |
|-----------|---------|---------|---------|---------|---------|---------|
| PALMD     | 460.44  | 355.03  | 424.84  | 408.31  | 386.15  | 393.91  |
| PTPRK     | 436.86  | 362.89  | 376.70  | 380.17  | 367.22  | 385.64  |
| SLC2A1    | 1081.42 | 898.07  | 1026.93 | 1070.73 | 908.90  | 960.17  |
| FLT1      | 1114.86 | 1010.05 | 957.02  | 1052.85 | 939.65  | 1076.36 |
| 1300013J1 | 194.63  | 161.60  | 160.71  | 164.25  | 164.38  | 176.04  |
| KCTD4     | 390.08  | 324.84  | 364.29  | 351.24  | 330.64  | 341.00  |
| MID1      | 250.33  | 222.37  | 235.08  | 253.25  | 212.91  | 214.64  |
| D8ERTD82  | 259.37  | 205.26  | 217.53  | 222.10  | 220.59  | 219.11  |
| EVC2      | 336.35  | 239.25  | 282.87  | 288.92  | 286.16  | 290.82  |
| AKAP8L    | 1131.26 | 984.73  | 1132.00 | 1089.84 | 963.29  | 1070.16 |
| NBL1      | 515.52  | 427.22  | 514.90  | 473.99  | 440.09  | 484.65  |
| COL6A1    | 546.53  | 679.91  | 680.68  | 707.27  | 466.82  | 542.01  |
| PKNOX2    | 535.46  | 437.44  | 471.00  | 543.15  | 457.19  | 562.15  |
| CACNG3    | 498.43  | 407.63  | 421.78  | 455.73  | 426.16  | 496.94  |
| LOC100041 | 3869.00 | 3446.71 | 3851.35 | 3817.02 | 3310.83 | 3415.82 |
| MORN4     | 403.05  | 357.88  | 408.63  | 360.29  | 345.78  | 366.17  |
| COL5A1    | 261.65  | 287.66  | 289.49  | 287.19  | 224.44  | 241.94  |
| FHL1      | 1398.92 | 1213.38 | 1344.78 | 1308.09 | 1200.32 | 1272.11 |
| OGN       | 189.75  | 150.01  | 163.49  | 164.83  | 163.05  | 175.27  |
| RAMP3     | 332.38  | 374.43  | 356.36  | 353.76  | 285.57  | 306.50  |
| UACA      | 277.72  | 232.17  | 269.31  | 242.34  | 238.64  | 242.16  |
| ACSL5     | 2885.33 | 2438.19 | 2597.07 | 2360.13 | 2478.86 | 2662.19 |
| ATG16L1   | 1207.75 | 1107.77 | 1193.42 | 1133.32 | 1043.21 | 1041.95 |
| GTPBP6    | 307.24  | 270.66  | 289.76  | 286.58  | 265.44  | 280.95  |
| LOC100041 | 6775.61 | 5282.22 | 5764.85 | 5923.94 | 5857.14 | 6789.89 |
| UBQLN4    | 1016.45 | 901.18  | 953.04  | 915.79  | 881.15  | 947.04  |
| PER2      | 1090.35 | 901.14  | 1045.01 | 1127.26 | 947.86  | 964.00  |
| SPAG5     | 314.14  | 246.27  | 280.47  | 297.88  | 272.63  | 282.99  |
| VIP       | 1681.82 | 1168.52 | 1389.54 | 1379.17 | 1458.94 | 1469.57 |
| ACCN2     | 836.83  | 716.93  | 789.30  | 801.24  | 726.89  | 757.42  |
| FKBP1A    | 2268.29 | 1995.29 | 1971.99 | 2078.19 | 1978.81 | 2011.93 |
| CITED4    | 282.69  | 227.32  | 233.70  | 225.02  | 246.64  | 247.76  |
| STARD8    | 619.35  | 416.32  | 462.30  | 465.39  | 540.45  | 572.35  |
| PSME1     | 532.34  | 464.04  | 510.63  | 500.09  | 464.89  | 476.32  |
| LOC100041 | 1562.29 | 1268.09 | 1312.67 | 1308.64 | 1366.65 | 1530.32 |
| EXDL2     | 1403.19 | 1230.91 | 1314.97 | 1336.57 | 1238.63 | 1296.21 |
| GJB2      | 206.14  | 163.67  | 192.04  | 197.90  | 182.02  | 189.89  |
| WNT4      | 237.90  | 208.40  | 216.97  | 215.09  | 210.09  | 220.11  |
| SCN3B     | 330.87  | 300.33  | 320.64  | 321.26  | 292.44  | 300.97  |
| SERPINF1  | 284.71  | 236.30  | 274.03  | 263.76  | 251.91  | 252.71  |
| DDIT4L    | 530.07  | 371.60  | 408.85  | 398.32  | 469.42  | 466.97  |
| ARSJ      | 202.37  | 173.43  | 193.88  | 197.11  | 179.86  | 175.93  |
| NAPEPLD   | 266.16  | 233.65  | 239.94  | 254.52  | 236.77  | 246.73  |

|           |         |         |         |         |         |         |
|-----------|---------|---------|---------|---------|---------|---------|
| BOK       | 571.53  | 501.61  | 492.21  | 472.13  | 508.89  | 529.87  |
| CIB2      | 543.34  | 487.72  | 534.59  | 497.50  | 485.18  | 497.04  |
| PVRL3     | 304.57  | 228.25  | 256.54  | 249.95  | 271.93  | 273.23  |
| MAPRE2    | 4564.66 | 4051.41 | 4169.19 | 4498.23 | 4086.93 | 4506.17 |
| ZBTB8B    | 260.45  | 232.98  | 255.35  | 226.84  | 233.24  | 241.20  |
| ZFP810    | 329.91  | 295.22  | 292.35  | 283.82  | 296.29  | 311.88  |
| BMP1      | 305.92  | 258.64  | 278.23  | 276.64  | 275.04  | 297.92  |
| 2510009EC | 761.94  | 622.34  | 674.26  | 639.35  | 690.48  | 748.86  |
| INSC      | 173.85  | 195.17  | 199.02  | 197.46  | 193.41  | 182.50  |
| EPHA7     | 310.34  | 347.83  | 320.34  | 350.18  | 346.14  | 343.67  |
| PRSS23    | 159.24  | 181.10  | 168.13  | 175.15  | 177.92  | 185.15  |
| CARHSP1   | 361.43  | 434.25  | 445.88  | 437.46  | 404.25  | 377.76  |
| PLXNB3    | 173.31  | 201.60  | 206.53  | 190.09  | 194.30  | 188.40  |
| HSD11B1   | 663.69  | 602.69  | 580.99  | 538.40  | 752.13  | 736.22  |
| LITAF     | 578.49  | 756.67  | 751.14  | 743.03  | 663.16  | 608.54  |
| ELAVL2    | 1512.36 | 1711.52 | 1674.79 | 1748.19 | 1735.32 | 1656.58 |
| SLC35F3   | 1397.83 | 1606.84 | 1600.29 | 1505.68 | 1605.09 | 1356.94 |
| DCBLD1    | 275.50  | 311.95  | 298.67  | 303.36  | 317.00  | 302.92  |
| TLE4      | 1261.39 | 1642.11 | 1542.38 | 1660.51 | 1454.58 | 1300.20 |
| 6330503K2 | 724.54  | 817.55  | 776.74  | 810.20  | 835.32  | 827.56  |
| PPP1R14A  | 205.30  | 242.60  | 243.11  | 243.00  | 237.57  | 221.89  |
| CPLX2     | 1683.48 | 1963.78 | 1673.02 | 1602.11 | 1947.29 | 1539.37 |
| PLLP      | 314.27  | 363.02  | 379.33  | 330.44  | 363.92  | 334.40  |
| ARSG      | 198.96  | 231.25  | 232.82  | 227.47  | 231.20  | 214.77  |
| PEBP1     | 704.21  | 873.29  | 741.52  | 759.65  | 818.22  | 818.25  |
| PIGZ      | 300.59  | 334.86  | 318.83  | 314.91  | 349.88  | 322.28  |
| ANLN      | 257.11  | 353.69  | 362.79  | 342.89  | 298.78  | 277.12  |
| CADPS2    | 2026.61 | 2316.18 | 2173.82 | 2273.78 | 2377.73 | 2273.52 |
| RHOG      | 223.52  | 272.07  | 263.93  | 260.65  | 262.60  | 265.33  |
| RELL1     | 323.97  | 384.58  | 338.12  | 366.85  | 383.52  | 395.69  |
| SCD1      | 1289.77 | 1518.31 | 1541.48 | 1357.45 | 1530.71 | 1601.19 |
| CLCN4-2   | 274.95  | 307.93  | 281.29  | 278.90  | 326.73  | 352.97  |
| LOC100041 | 235.68  | 294.14  | 259.79  | 282.04  | 280.23  | 280.22  |
| FOS       | 891.64  | 735.89  | 802.21  | 828.73  | 1069.21 | 1008.90 |
| PBRM1     | 494.48  | 576.55  | 535.29  | 585.97  | 594.42  | 560.81  |
| INA       | 1358.49 | 1594.56 | 1514.18 | 1358.54 | 1640.97 | 1673.39 |
| SLC44A1   | 286.47  | 362.21  | 373.04  | 341.66  | 346.31  | 327.84  |
| SULF1     | 354.50  | 526.45  | 476.18  | 494.61  | 429.28  | 368.48  |
| PCBP2     | 1518.99 | 1819.35 | 1764.92 | 1809.22 | 1841.92 | 1980.65 |
| LOC100042 | 362.56  | 456.54  | 379.05  | 379.78  | 440.24  | 446.82  |
| KCNK13    | 258.44  | 315.14  | 313.06  | 307.59  | 314.99  | 283.91  |
| SKP1A     | 1833.51 | 2157.53 | 1996.46 | 2131.92 | 2233.09 | 2311.41 |
| EVI2A     | 310.35  | 405.69  | 399.82  | 410.03  | 380.46  | 328.90  |

|         |         |          |          |          |          |          |
|---------|---------|----------|----------|----------|----------|----------|
| NETO1   | 455.06  | 532.60   | 501.25   | 480.93   | 557.84   | 463.93   |
| KIF5A   | 2560.76 | 3037.25  | 3145.25  | 3165.43  | 3143.54  | 3287.11  |
| FAM134B | 1896.91 | 2262.22  | 2134.50  | 2231.58  | 2338.66  | 2313.83  |
| ADAMTS4 | 205.40  | 246.10   | 249.68   | 235.06   | 254.46   | 249.55   |
| MYL4    | 1665.41 | 2090.86  | 1995.04  | 1883.82  | 2069.09  | 1837.69  |
| MOG     | 379.79  | 563.71   | 535.19   | 544.46   | 474.09   | 419.21   |
| LASS2   | 613.94  | 773.60   | 799.46   | 804.42   | 768.70   | 722.89   |
| ADSSL1  | 526.60  | 653.39   | 607.32   | 563.43   | 661.46   | 637.50   |
| OLIG1   | 3788.25 | 4285.84  | 4411.12  | 4559.03  | 4796.23  | 4612.18  |
| GLTP    | 586.45  | 707.07   | 717.50   | 790.80   | 746.00   | 689.84   |
| CNP     | 476.63  | 614.93   | 689.64   | 603.29   | 613.05   | 561.08   |
| FUT9    | 186.37  | 209.36   | 191.67   | 193.86   | 241.04   | 201.80   |
| TRIM59  | 196.50  | 230.83   | 235.63   | 258.71   | 254.40   | 240.15   |
| SC4MOL  | 1416.04 | 1812.87  | 1609.18  | 1728.97  | 1834.12  | 1720.20  |
| EDG2    | 247.87  | 333.06   | 329.97   | 330.12   | 320.58   | 331.38   |
| HTR1F   | 257.31  | 307.60   | 298.44   | 293.46   | 333.55   | 295.49   |
| SST     | 5639.65 | 7078.31  | 7273.58  | 7060.53  | 7318.46  | 7443.51  |
| TMEM178 | 1990.24 | 2514.92  | 2326.59  | 2251.67  | 2623.36  | 2642.73  |
| ARC     | 1540.68 | 1276.26  | 1674.46  | 1495.06  | 2034.59  | 1923.85  |
| MOBP    | 406.82  | 582.90   | 625.05   | 616.31   | 539.88   | 495.93   |
| PLEKHB1 | 1869.85 | 2605.75  | 2931.23  | 2659.69  | 2473.21  | 2236.16  |
| IL33    | 409.98  | 507.17   | 498.85   | 473.65   | 547.23   | 520.73   |
| ENPP6   | 232.18  | 313.70   | 337.68   | 341.00   | 310.33   | 322.50   |
| DUSP1   | 1527.60 | 1299.03  | 1500.56  | 1314.19  | 2057.41  | 1841.03  |
| FA2H    | 829.22  | 1272.96  | 1325.89  | 1271.81  | 1117.86  | 998.97   |
| OPALIN  | 401.24  | 509.14   | 526.93   | 511.40   | 540.91   | 455.11   |
| MEGF9   | 698.69  | 608.72   | 750.40   | 692.27   | 943.72   | 715.20   |
| QDPR    | 683.92  | 958.86   | 836.47   | 862.82   | 926.45   | 910.80   |
| KCNA1   | 876.05  | 1106.77  | 956.87   | 965.99   | 1189.11  | 1040.73  |
| TRF     | 948.66  | 1574.05  | 1574.61  | 1670.56  | 1296.39  | 1256.91  |
| NDRG1   | 393.75  | 540.13   | 518.09   | 611.24   | 543.77   | 510.41   |
| PLP1    | 8450.14 | 10942.18 | 11020.21 | 11229.94 | 11832.35 | 10984.42 |
| TSPAN2  | 601.13  | 827.53   | 809.55   | 881.84   | 843.12   | 763.16   |
| PRR18   | 918.15  | 1476.38  | 1542.27  | 1453.68  | 1294.13  | 1108.98  |
| CLDN11  | 5329.87 | 8074.15  | 8736.34  | 8323.82  | 7533.85  | 6794.11  |
| MBP     | 4321.70 | 6460.55  | 6594.92  | 6205.91  | 6104.00  | 5576.93  |
| SCN4B   | 652.43  | 928.71   | 816.18   | 700.53   | 920.11   | 891.47   |
| MAG     | 1583.86 | 2329.69  | 2642.31  | 2425.40  | 2240.27  | 2110.33  |
| UGT8A   | 474.35  | 684.72   | 675.81   | 707.48   | 682.65   | 630.29   |
| GJC2    | 265.03  | 368.71   | 370.38   | 366.01   | 383.14   | 344.61   |
| MAL     | 826.96  | 1246.55  | 1364.64  | 1242.61  | 1289.23  | 1145.85  |
| BCAS1   | 3152.48 | 5046.88  | 5330.38  | 5369.41  | 5088.14  | 4732.15  |
| NEFM    | 878.94  | 1175.00  | 843.35   | 934.53   | 1421.93  | 1277.82  |

|           |         |         |         |         |         |         |
|-----------|---------|---------|---------|---------|---------|---------|
| LPGAT1    | 280.36  | 347.97  | 324.80  | 346.97  | 455.14  | 384.33  |
| 6030405A' | 658.07  | 524.12  | 534.86  | 546.87  | 568.95  | 635.73  |
| TBC1D13   | 536.56  | 479.70  | 522.24  | 509.03  | 480.66  | 498.28  |
| LGI2      | 545.59  | 613.09  | 606.22  | 568.78  | 618.33  | 562.41  |
| SERGEF    | 318.89  | 277.65  | 309.39  | 295.60  | 281.98  | 292.13  |
| AB182283  | 387.07  | 429.12  | 418.85  | 413.91  | 427.58  | 429.18  |
| LYZ2      | 192.44  | 166.04  | 186.78  | 179.24  | 171.34  | 168.62  |
| KLF2      | 221.50  | 189.91  | 207.49  | 209.60  | 198.68  | 209.84  |
| LOC10004  | 226.59  | 289.88  | 248.57  | 262.41  | 260.94  | 243.95  |
| NFIB      | 1616.99 | 1982.83 | 2041.95 | 2130.23 | 1908.67 | 1817.03 |
| PACS2     | 1841.68 | 2166.36 | 2192.98 | 2147.57 | 2051.80 | 2146.02 |
| 2310021P1 | 562.50  | 486.53  | 548.52  | 550.59  | 482.38  | 533.45  |
| CRYAB     | 414.60  | 570.25  | 554.41  | 544.50  | 532.67  | 487.44  |
| LRRN1     | 778.36  | 915.88  | 843.79  | 916.02  | 915.15  | 874.09  |
| NDST1     | 761.56  | 877.76  | 888.62  | 871.09  | 839.24  | 842.49  |
| NRP1      | 812.07  | 1010.23 | 964.48  | 943.10  | 925.56  | 872.16  |
| ZBTB7C    | 226.43  | 196.30  | 213.72  | 214.06  | 203.21  | 211.38  |
| VSTM2B    | 1268.16 | 1484.47 | 1342.76 | 1450.16 | 1416.02 | 1424.55 |
| OPRK1     | 161.60  | 183.67  | 181.43  | 167.34  | 181.55  | 167.87  |
| TMEM19    | 243.95  | 278.29  | 264.83  | 276.08  | 275.34  | 276.99  |
| PRKG2     | 279.98  | 233.95  | 282.45  | 265.32  | 246.31  | 250.33  |
| BTBD3     | 795.83  | 611.27  | 660.22  | 571.77  | 713.92  | 634.90  |
| CBLN4     | 403.24  | 345.10  | 334.00  | 350.12  | 361.38  | 377.84  |
| UNC5B     | 205.92  | 255.06  | 243.66  | 246.55  | 226.91  | 218.24  |
| ZDHHHC14  | 833.10  | 721.15  | 732.39  | 729.73  | 734.99  | 777.54  |
| SLC6A13   | 190.04  | 152.52  | 166.91  | 171.23  | 169.03  | 176.76  |
| 4930511J1 | 200.98  | 176.20  | 188.98  | 183.89  | 181.48  | 186.29  |
| MARCH4    | 257.22  | 223.64  | 241.31  | 243.45  | 228.29  | 236.81  |
| SLAIN1    | 221.18  | 261.20  | 249.38  | 258.04  | 257.00  | 262.55  |
| ATP5F1    | 1552.15 | 1798.12 | 1576.69 | 1807.40 | 1780.70 | 1734.55 |
| INPPL1    | 444.00  | 491.22  | 496.47  | 483.01  | 485.56  | 480.28  |
| PLEKHA2   | 612.50  | 754.15  | 650.22  | 663.68  | 690.85  | 623.16  |
| OTX1      | 547.41  | 718.79  | 603.33  | 586.35  | 624.62  | 642.74  |
| B930076A( | 604.20  | 524.33  | 537.96  | 551.00  | 540.53  | 645.95  |
| RIMS3     | 2519.10 | 1976.33 | 2206.97 | 1943.18 | 2149.75 | 2391.44 |
| DRD1A     | 413.18  | 501.76  | 550.61  | 537.63  | 466.99  | 433.19  |
| LOC10004' | 274.56  | 331.43  | 294.12  | 314.58  | 328.10  | 323.56  |
| RAB5A     | 807.86  | 897.68  | 827.99  | 945.98  | 896.50  | 889.52  |
| CUX2      | 677.29  | 356.68  | 562.84  | 499.76  | 582.78  | 607.63  |
| KCNK6     | 236.02  | 212.35  | 222.65  | 215.19  | 216.24  | 217.74  |
| CTGF      | 1097.07 | 2053.17 | 2004.13 | 1923.24 | 1219.71 | 1110.06 |
| DLK2      | 565.92  | 489.06  | 561.59  | 565.28  | 502.54  | 514.97  |
| ADAMTSL2  | 200.77  | 175.55  | 189.48  | 187.89  | 181.60  | 178.83  |

|           |          |         |         |         |         |         |
|-----------|----------|---------|---------|---------|---------|---------|
| EG434858  | 417.55   | 459.16  | 401.41  | 438.12  | 381.80  | 380.24  |
| FMO1      | 204.63   | 170.22  | 201.41  | 200.30  | 182.15  | 188.00  |
| MTMR2     | 230.79   | 256.07  | 236.84  | 244.42  | 252.88  | 257.36  |
| S100A6    | 265.31   | 240.43  | 260.68  | 235.37  | 241.42  | 244.36  |
| EFCAB1    | 235.58   | 187.67  | 213.94  | 212.61  | 211.87  | 217.93  |
| FBXL10    | 304.59   | 273.78  | 287.67  | 288.87  | 275.88  | 295.38  |
| OTOF      | 181.64   | 147.99  | 174.05  | 179.42  | 165.15  | 162.66  |
| NDRL      | 414.88   | 537.00  | 585.08  | 604.53  | 483.36  | 496.92  |
| EGR2      | 373.88   | 265.16  | 290.74  | 313.47  | 343.96  | 324.76  |
| RREB1     | 293.53   | 230.26  | 268.56  | 273.06  | 269.84  | 276.96  |
| NAV1      | 1510.42  | 1336.60 | 1445.18 | 1475.30 | 1361.56 | 1434.41 |
| ANXA3     | 418.02   | 376.20  | 391.34  | 387.77  | 380.51  | 385.25  |
| TTYH2     | 176.23   | 205.04  | 202.96  | 197.49  | 194.46  | 193.73  |
| VGFB      | 3807.62  | 3168.51 | 3477.84 | 3543.20 | 3461.53 | 4088.61 |
| SEMA5A    | 726.57   | 1092.01 | 963.58  | 956.71  | 806.17  | 734.83  |
| SLC26A4   | 374.46   | 321.96  | 351.80  | 358.19  | 340.13  | 337.14  |
| TLE1      | 572.62   | 471.37  | 512.53  | 485.73  | 527.05  | 521.67  |
| EPHX1     | 307.54   | 259.82  | 290.15  | 273.14  | 278.30  | 288.15  |
| VASN      | 293.87   | 244.71  | 242.30  | 253.75  | 261.41  | 264.05  |
| SOX5      | 391.94   | 456.21  | 438.53  | 425.61  | 429.25  | 389.66  |
| RASGRF1   | 5854.33  | 5330.52 | 5269.98 | 5401.88 | 5397.43 | 6044.15 |
| IL11RA1   | 2002.59  | 2305.29 | 2009.94 | 2177.15 | 2221.93 | 2000.44 |
| ANKRD6    | 211.69   | 179.57  | 204.11  | 202.65  | 194.83  | 202.28  |
| SLC7A11   | 407.83   | 333.09  | 400.04  | 392.46  | 359.00  | 368.23  |
| AI314976  | 163.01   | 185.01  | 173.67  | 171.70  | 181.26  | 178.25  |
| FAM13C    | 346.17   | 305.61  | 329.32  | 340.01  | 314.79  | 330.56  |
| CALB2     | 297.13   | 253.07  | 288.83  | 283.41  | 266.39  | 276.49  |
| C130090K2 | 199.11   | 233.60  | 206.01  | 220.73  | 215.44  | 208.37  |
| CDC42EP2  | 236.69   | 267.15  | 272.09  | 256.38  | 258.20  | 242.12  |
| CAMK2A    | 2651.15  | 2308.83 | 2368.00 | 2124.45 | 2424.92 | 2572.00 |
| SYTL2     | 1163.99  | 1020.31 | 1011.30 | 946.71  | 1050.51 | 1128.40 |
| IGSF9     | 178.10   | 161.56  | 164.07  | 166.36  | 164.38  | 171.02  |
| RGS4      | 5781.32  | 5197.34 | 5082.36 | 5356.50 | 6300.89 | 6096.10 |
| EHMT2     | 614.33   | 540.75  | 589.02  | 586.15  | 564.10  | 607.10  |
| REEP5     | 3056.28  | 3550.15 | 3767.85 | 3430.98 | 3398.74 | 3877.83 |
| JOSD1     | 2080.26  | 1848.11 | 2169.01 | 1923.15 | 1917.87 | 1928.92 |
| GAL3ST1   | 271.08   | 340.22  | 315.37  | 310.68  | 299.90  | 297.69  |
| HIST1H2AC | 1255.30  | 1124.75 | 1430.46 | 1254.04 | 1143.05 | 1110.91 |
| TCF4      | 10613.21 | 9451.73 | 9400.15 | 9804.75 | 9605.30 | 9653.79 |
| FBF1      | 316.25   | 268.12  | 303.02  | 289.86  | 286.34  | 291.02  |
| ADAMTSL2  | 160.07   | 176.81  | 170.60  | 186.64  | 174.55  | 175.43  |
| SLC4A3    | 652.83   | 548.70  | 572.23  | 583.05  | 607.49  | 661.85  |
| DIAP3     | 211.68   | 234.31  | 202.14  | 195.97  | 231.02  | 223.85  |

|           |          |         |          |          |          |         |
|-----------|----------|---------|----------|----------|----------|---------|
| GUCY1A3   | 955.42   | 793.52  | 841.13   | 856.16   | 854.17   | 852.45  |
| CAMK1G    | 216.30   | 196.82  | 208.04   | 203.23   | 200.95   | 211.29  |
| PDLIM2    | 208.85   | 247.29  | 253.37   | 235.29   | 229.94   | 218.49  |
| 2810405KC | 649.48   | 541.57  | 580.08   | 600.33   | 579.76   | 571.86  |
| GADD45A   | 352.41   | 423.56  | 391.14   | 408.52   | 383.95   | 367.89  |
| RYR1      | 218.12   | 194.16  | 204.53   | 211.66   | 203.28   | 213.09  |
| RXFP3     | 183.19   | 161.04  | 163.69   | 173.10   | 168.22   | 181.38  |
| FIGN      | 157.09   | 174.03  | 173.34   | 177.21   | 170.82   | 161.75  |
| CLCN2     | 329.82   | 283.15  | 293.42   | 290.52   | 301.22   | 318.66  |
| AB112350  | 277.48   | 249.40  | 257.94   | 258.39   | 254.83   | 248.14  |
| PLEKHG3   | 248.74   | 289.38  | 294.33   | 296.47   | 270.75   | 270.06  |
| RELN      | 1780.64  | 1389.91 | 1470.76  | 1566.18  | 1614.53  | 1658.83 |
| THAP3     | 153.79   | 172.94  | 164.65   | 156.55   | 169.50   | 158.83  |
| TGM2      | 278.46   | 231.16  | 241.67   | 254.44   | 253.73   | 246.20  |
| ZFP148    | 844.75   | 717.86  | 824.35   | 823.68   | 777.50   | 791.13  |
| ACTA2     | 238.57   | 209.02  | 224.38   | 237.29   | 220.98   | 220.62  |
| ANO4      | 419.17   | 494.41  | 472.43   | 448.80   | 468.14   | 406.89  |
| BC030499  | 222.30   | 196.42  | 216.04   | 204.06   | 202.94   | 198.45  |
| ITGB4     | 199.11   | 245.28  | 252.41   | 235.69   | 216.41   | 213.37  |
| NPY1R     | 392.93   | 336.64  | 329.01   | 339.13   | 351.89   | 368.70  |
| DARC      | 1120.18  | 954.04  | 1090.13  | 1029.18  | 1029.41  | 1043.69 |
| ADORA1    | 588.66   | 685.14  | 673.37   | 663.58   | 646.40   | 638.95  |
| RIMS1     | 514.61   | 624.73  | 550.06   | 545.58   | 573.60   | 544.49  |
| TMEM63A   | 214.55   | 243.27  | 251.39   | 256.02   | 236.22   | 229.54  |
| MIF4GD    | 257.16   | 284.25  | 276.57   | 280.96   | 276.63   | 290.28  |
| GAB1      | 450.16   | 554.87  | 567.70   | 578.06   | 485.73   | 472.56  |
| AGAP1     | 2043.09  | 2365.64 | 2418.73  | 2548.42  | 2285.70  | 2144.77 |
| NIPA1     | 776.71   | 909.57  | 832.95   | 920.70   | 873.40   | 818.32  |
| BCL9L     | 440.23   | 393.57  | 405.30   | 410.96   | 404.89   | 399.42  |
| TRIB2     | 652.88   | 560.47  | 641.07   | 586.46   | 584.02   | 613.86  |
| BDNF      | 445.07   | 364.05  | 397.02   | 390.13   | 406.96   | 409.15  |
| NFE2L3    | 160.27   | 181.55  | 163.31   | 173.89   | 175.70   | 162.07  |
| PRELP     | 367.46   | 288.60  | 350.56   | 329.78   | 337.36   | 362.23  |
| WASF1     | 11317.62 | 9601.40 | 10130.59 | 10498.74 | 10366.80 | 9774.86 |
| TMEM125   | 211.40   | 242.38  | 245.66   | 229.43   | 227.81   | 226.15  |
| NEURL     | 5971.19  | 4949.24 | 5594.98  | 5470.42  | 5322.78  | 5214.05 |
| HSPA2     | 1396.52  | 1165.77 | 1262.46  | 1253.90  | 1267.46  | 1360.04 |
| 1700019DC | 414.03   | 478.00  | 444.08   | 451.49   | 452.73   | 435.84  |
| EFHD1     | 303.00   | 353.33  | 356.90   | 356.09   | 333.36   | 310.98  |
| CDH8      | 328.49   | 271.96  | 277.43   | 281.13   | 308.82   | 312.68  |
| PLCH2     | 665.17   | 542.21  | 626.07   | 625.93   | 589.20   | 682.63  |
| ZFPM2     | 894.12   | 1261.37 | 1112.32  | 1157.32  | 974.00   | 873.70  |
| RAPGEF4   | 1891.66  | 2219.49 | 2253.17  | 2282.20  | 2111.76  | 2218.30 |

|           |         |         |         |         |         |         |
|-----------|---------|---------|---------|---------|---------|---------|
| STK4      | 962.81  | 1083.85 | 1005.24 | 1010.95 | 1047.38 | 1000.58 |
| DOK4      | 235.10  | 274.34  | 266.02  | 259.19  | 261.48  | 255.92  |
| PDE4D     | 199.43  | 179.09  | 191.76  | 184.04  | 185.07  | 188.42  |
| ODZ3      | 214.91  | 240.12  | 237.67  | 233.82  | 230.90  | 209.23  |
| CYP1B1    | 167.80  | 149.52  | 162.63  | 165.98  | 156.79  | 159.03  |
| TRIM36    | 186.44  | 211.93  | 197.79  | 206.09  | 200.46  | 201.31  |
| ANXA11    | 855.17  | 720.09  | 727.51  | 720.11  | 770.81  | 837.68  |
| TTC19     | 752.79  | 854.73  | 751.82  | 782.02  | 812.49  | 822.00  |
| JUNB      | 766.44  | 590.53  | 688.87  | 683.77  | 676.05  | 668.71  |
| UAP1      | 794.12  | 950.09  | 826.72  | 840.53  | 877.89  | 936.57  |
| EXTL3     | 1298.53 | 1132.39 | 1171.11 | 1140.84 | 1200.59 | 1266.70 |
| RNMT      | 556.91  | 646.07  | 594.02  | 604.22  | 612.02  | 587.83  |
| D930028F  | 313.04  | 283.12  | 284.82  | 288.98  | 293.86  | 293.34  |
| GM129     | 360.73  | 316.29  | 325.40  | 340.26  | 334.06  | 324.13  |
| C1QC      | 540.14  | 462.37  | 519.81  | 524.61  | 498.95  | 501.68  |
| ATP8B1    | 171.34  | 190.38  | 179.70  | 183.20  | 183.85  | 176.89  |
| NTSR1     | 256.74  | 307.02  | 301.47  | 298.20  | 232.82  | 239.03  |
| PHLDB1    | 308.10  | 359.13  | 362.91  | 379.85  | 336.59  | 357.50  |
| S100A8    | 200.36  | 168.40  | 233.87  | 182.29  | 188.23  | 171.16  |
| RNF19A    | 1014.98 | 874.02  | 1003.75 | 973.55  | 929.69  | 912.48  |
| NPTX2     | 1680.11 | 1463.07 | 1610.33 | 1473.78 | 1555.46 | 1638.59 |
| RHBDL3    | 278.90  | 244.98  | 264.75  | 256.68  | 257.40  | 271.69  |
| H47       | 1242.18 | 1110.26 | 1204.20 | 1143.34 | 1157.20 | 1159.25 |
| MYO5B     | 169.77  | 188.88  | 166.09  | 181.35  | 181.67  | 165.94  |
| RGL1      | 1773.48 | 1586.52 | 1810.62 | 1842.91 | 1665.22 | 1768.86 |
| NGFRAP1   | 3916.80 | 3495.32 | 3835.33 | 3527.18 | 3674.71 | 3448.63 |
| BC067047  | 439.43  | 380.43  | 412.90  | 401.68  | 407.11  | 391.92  |
| KHDRBS2   | 294.65  | 260.53  | 264.67  | 267.56  | 273.57  | 269.59  |
| TPBG      | 433.83  | 510.54  | 484.42  | 505.83  | 467.57  | 442.63  |
| AI593442  | 949.69  | 838.92  | 841.05  | 807.60  | 889.03  | 938.54  |
| 4930544G  | 2851.14 | 2507.89 | 2742.60 | 2645.72 | 2654.04 | 2723.85 |
| DUSP18    | 203.63  | 174.38  | 199.22  | 184.00  | 186.26  | 189.01  |
| NMRAL1    | 282.12  | 330.56  | 334.06  | 329.11  | 301.06  | 281.00  |
| D930015E  | 193.37  | 173.88  | 196.76  | 183.99  | 181.77  | 191.92  |
| FSTL4     | 483.61  | 394.15  | 429.53  | 392.78  | 447.10  | 496.40  |
| NOL4      | 899.84  | 799.19  | 841.30  | 932.34  | 966.98  | 1009.85 |
| GLRA2     | 699.73  | 960.30  | 857.15  | 920.17  | 769.32  | 717.05  |
| CAR14     | 206.29  | 236.91  | 224.76  | 247.87  | 222.98  | 225.28  |
| 5330439J0 | 895.33  | 781.95  | 874.87  | 832.75  | 831.40  | 811.92  |
| CHRM2     | 176.09  | 195.76  | 188.47  | 180.34  | 186.32  | 173.60  |
| SAP130    | 560.94  | 506.61  | 551.85  | 570.50  | 531.92  | 556.05  |
| EFEMP2    | 216.01  | 193.79  | 211.02  | 210.64  | 202.42  | 203.80  |
| OLFML3    | 373.32  | 337.08  | 375.45  | 345.28  | 352.82  | 366.58  |



|           |         |         |         |         |         |         |
|-----------|---------|---------|---------|---------|---------|---------|
| SPOP      | 4377.27 | 4993.11 | 4685.34 | 4517.82 | 4041.14 | 4369.55 |
| BHLHB2    | 2890.24 | 2142.83 | 2256.79 | 2509.82 | 2590.74 | 2771.66 |
| ETS1      | 318.86  | 283.30  | 280.09  | 291.28  | 297.86  | 301.08  |
| OSBPL9    | 1248.81 | 1498.25 | 1344.75 | 1407.49 | 1342.45 | 1381.47 |
| CDC42EP4  | 349.00  | 299.21  | 328.65  | 308.10  | 321.83  | 313.13  |
| PCTK1     | 1598.93 | 1413.91 | 1499.08 | 1357.50 | 1497.27 | 1497.35 |
| LOC10004  | 510.66  | 453.93  | 506.92  | 477.86  | 481.32  | 470.01  |
| SULT1A1   | 259.56  | 229.63  | 235.70  | 234.65  | 246.14  | 261.72  |
| PRSS35    | 303.44  | 438.08  | 379.38  | 435.26  | 328.93  | 315.81  |
| ABCA8A    | 157.19  | 175.40  | 165.58  | 174.56  | 165.58  | 166.49  |
| EMID2     | 194.20  | 174.18  | 190.65  | 185.52  | 183.12  | 195.98  |
| CD82      | 242.27  | 280.41  | 278.29  | 280.43  | 256.38  | 251.66  |
| THBD      | 177.96  | 160.85  | 166.82  | 175.65  | 168.19  | 180.02  |
| PDYN      | 564.67  | 446.60  | 487.61  | 522.67  | 530.79  | 559.38  |
| NPM3-PS1  | 677.23  | 603.42  | 735.44  | 611.57  | 635.44  | 603.10  |
| RYR3      | 252.17  | 285.35  | 280.18  | 300.03  | 237.87  | 268.50  |
| RANBP3L   | 279.88  | 234.93  | 262.12  | 258.74  | 262.10  | 256.80  |
| ZIC1      | 303.99  | 250.65  | 284.10  | 294.74  | 278.42  | 276.19  |
| ST8SIA2   | 159.44  | 141.62  | 147.94  | 155.87  | 151.68  | 148.55  |
| MKX       | 438.89  | 391.22  | 385.95  | 403.25  | 415.71  | 421.37  |
| CCK       | 4818.67 | 4050.72 | 4451.65 | 4480.14 | 5111.62 | 5122.93 |
| RPRM      | 1636.35 | 2904.01 | 2434.56 | 2352.35 | 1823.11 | 1672.55 |
| CPNE9     | 1264.90 | 982.09  | 1046.20 | 1051.74 | 1185.53 | 1341.66 |
| DUSP6     | 1181.47 | 975.13  | 1035.56 | 1045.70 | 1256.03 | 1220.21 |
| RGS6      | 250.35  | 223.66  | 238.42  | 239.69  | 236.99  | 235.06  |
| OTOP2     | 179.91  | 158.77  | 173.93  | 168.85  | 169.39  | 171.00  |
| ASAH2     | 340.34  | 386.58  | 342.07  | 358.83  | 359.79  | 353.92  |
| CDH7      | 243.50  | 207.90  | 216.06  | 224.86  | 229.74  | 228.98  |
| ELOVL6    | 756.68  | 848.26  | 785.77  | 833.47  | 797.93  | 745.41  |
| ADRA2A    | 415.49  | 601.35  | 561.49  | 583.31  | 442.53  | 432.46  |
| CD47      | 1431.79 | 1651.05 | 1705.41 | 1621.39 | 1524.21 | 1477.91 |
| DYNC1LI2  | 313.30  | 354.77  | 327.67  | 325.06  | 331.00  | 327.37  |
| PRDX3     | 605.39  | 686.42  | 680.17  | 658.36  | 644.19  | 655.15  |
| CHST1     | 7898.66 | 6610.38 | 7156.60 | 7109.08 | 7321.06 | 7216.56 |
| 4933439C2 | 2067.27 | 1799.22 | 2061.91 | 2077.09 | 1932.44 | 2285.46 |
| AGFG1     | 530.58  | 477.07  | 519.76  | 523.94  | 507.75  | 486.78  |
| CAMKK1    | 828.92  | 735.68  | 786.70  | 826.35  | 780.26  | 781.73  |
| CD83      | 363.63  | 316.53  | 324.92  | 349.44  | 341.73  | 370.67  |
| HSD17B11  | 242.19  | 271.71  | 230.26  | 245.31  | 229.48  | 230.82  |
| PIGP      | 915.53  | 1037.52 | 887.37  | 977.14  | 958.83  | 948.24  |
| FGF10     | 254.50  | 295.15  | 292.33  | 289.72  | 265.89  | 260.87  |
| GPR83     | 1087.45 | 959.60  | 1019.90 | 987.57  | 1022.87 | 989.21  |
| SLA       | 416.64  | 581.02  | 560.89  | 567.69  | 389.53  | 369.73  |

|          |         |         |         |         |         |         |
|----------|---------|---------|---------|---------|---------|---------|
| CASP1    | 232.58  | 200.49  | 205.56  | 207.37  | 220.36  | 218.37  |
| THSD7B   | 176.61  | 202.84  | 194.76  | 194.53  | 184.03  | 188.43  |
| GPR21    | 199.99  | 235.50  | 214.63  | 208.15  | 214.67  | 214.01  |
| H2AFY    | 865.85  | 987.68  | 941.55  | 946.11  | 911.74  | 936.09  |
| PRICKLE1 | 1970.16 | 2297.85 | 2078.46 | 2218.00 | 2095.07 | 2190.24 |
| FBXO32   | 169.35  | 185.87  | 178.33  | 175.58  | 176.26  | 176.57  |
| ZYX      | 1971.59 | 2287.55 | 2164.05 | 2134.91 | 1857.09 | 1889.25 |
| CRTAC1   | 553.01  | 663.51  | 617.71  | 591.17  | 588.48  | 630.69  |
| RTN4RL1  | 648.52  | 521.49  | 552.85  | 577.60  | 599.94  | 641.02  |
| DNAJB1   | 2796.87 | 2438.78 | 2792.62 | 2491.59 | 2624.52 | 2587.70 |
| ADCYAP1  | 433.84  | 360.11  | 386.34  | 360.42  | 406.12  | 440.27  |
| TRPC7    | 329.52  | 285.79  | 338.03  | 332.50  | 308.98  | 310.01  |
| PER1     | 778.30  | 643.71  | 682.48  | 755.71  | 728.59  | 753.31  |
| INPP4B   | 189.56  | 209.95  | 196.16  | 200.93  | 181.30  | 184.57  |
| CSF1R    | 351.57  | 312.92  | 329.99  | 313.89  | 336.10  | 346.25  |
| NOS1AP   | 338.57  | 413.59  | 336.06  | 326.02  | 364.56  | 314.60  |
| WDR60    | 325.31  | 287.55  | 304.81  | 334.17  | 308.26  | 301.12  |
| GRIK1    | 433.54  | 491.88  | 462.23  | 450.41  | 455.63  | 418.67  |
| GCNT2    | 694.93  | 552.58  | 590.49  | 617.41  | 658.94  | 674.98  |
| FAM132B  | 169.53  | 187.78  | 179.80  | 178.09  | 176.07  | 173.53  |
| LMO3     | 322.55  | 364.94  | 354.46  | 335.42  | 308.21  | 298.72  |
| LOC10004 | 282.24  | 247.33  | 278.06  | 282.86  | 270.13  | 272.96  |
| ARHGAP25 | 363.12  | 462.50  | 435.66  | 419.14  | 380.00  | 376.15  |
| HIST2H3B | 1149.89 | 1028.72 | 1121.36 | 1151.02 | 1100.54 | 1056.16 |
| DBNDD2   | 1962.29 | 2267.09 | 2263.98 | 2108.01 | 2044.10 | 1860.67 |
| RASL11B  | 2320.70 | 2734.13 | 2511.37 | 2313.46 | 2407.48 | 2280.35 |
| LOC10004 | 833.55  | 1011.17 | 1068.05 | 1074.03 | 876.24  | 830.74  |
| CGGBP1   | 1504.27 | 1320.62 | 1495.34 | 1477.30 | 1438.94 | 1450.67 |
| SCHIP1   | 3360.97 | 2906.10 | 3221.90 | 3278.62 | 3210.34 | 3345.23 |
| TNNC1    | 661.09  | 385.53  | 549.43  | 568.08  | 623.77  | 665.74  |
| RAB3B    | 266.92  | 302.22  | 282.90  | 294.47  | 278.55  | 290.79  |
| CPNE8    | 307.04  | 278.94  | 262.56  | 278.05  | 295.98  | 289.91  |
| LINGO2   | 416.21  | 347.73  | 374.95  | 364.14  | 400.06  | 394.93  |
| GBP2     | 185.16  | 183.29  | 295.88  | 239.48  | 178.80  | 175.44  |
| NEU2     | 522.39  | 610.93  | 536.87  | 563.41  | 545.87  | 545.96  |
| PADI6    | 164.27  | 193.63  | 191.54  | 186.80  | 157.56  | 157.46  |
| CAMTA2   | 6252.58 | 5461.76 | 5698.88 | 5405.97 | 6003.96 | 6235.03 |
| HAPLN2   | 179.78  | 208.66  | 208.11  | 198.23  | 187.11  | 194.19  |
| EPB4.9   | 2208.69 | 2012.11 | 2034.88 | 2074.39 | 2132.18 | 2229.23 |
| LOC10004 | 4000.94 | 2921.47 | 3217.07 | 3406.41 | 3729.92 | 3737.90 |
| TPD52L1  | 277.73  | 246.07  | 255.56  | 249.01  | 268.99  | 272.63  |
| CHRNA5   | 167.67  | 189.90  | 175.71  | 181.60  | 173.52  | 175.54  |
| MT3      | 1417.98 | 1280.06 | 1446.32 | 1288.16 | 1367.27 | 1297.53 |

|           |         |         |         |         |         |         |
|-----------|---------|---------|---------|---------|---------|---------|
| H2-T23    | 333.01  | 387.44  | 349.89  | 353.86  | 345.27  | 334.26  |
| ODZ4      | 1386.94 | 1162.36 | 1242.41 | 1317.37 | 1327.34 | 1219.20 |
| MYOC      | 160.49  | 139.86  | 149.69  | 154.45  | 153.83  | 151.43  |
| SYT17     | 199.62  | 173.68  | 186.34  | 191.52  | 192.65  | 183.60  |
| SLC1A3    | 6404.05 | 5588.08 | 6344.83 | 5963.60 | 6633.87 | 6784.67 |
| OSBP2     | 570.25  | 487.79  | 482.44  | 476.17  | 600.94  | 589.13  |
| EGR4      | 1280.54 | 915.08  | 1027.40 | 1023.88 | 1208.43 | 1195.97 |
| STAC2     | 1044.30 | 1186.82 | 1024.64 | 1069.60 | 1089.10 | 1001.50 |
| SEPT5     | 1306.74 | 1151.57 | 1158.89 | 1125.56 | 1256.53 | 1272.18 |
| ERDR1     | 380.35  | 329.79  | 399.57  | 387.37  | 365.48  | 374.24  |
| COCH      | 232.94  | 189.50  | 192.97  | 212.67  | 242.24  | 223.63  |
| SLC2A13   | 2557.38 | 2199.50 | 2108.99 | 2174.50 | 2450.06 | 2595.53 |
| LOC10004  | 539.61  | 450.74  | 510.91  | 507.31  | 516.64  | 543.69  |
| 633040611 | 477.05  | 430.71  | 408.67  | 448.87  | 462.75  | 477.33  |
| SLC7A4    | 1505.26 | 1696.64 | 1579.82 | 1710.71 | 1558.99 | 1615.19 |
| TMCC2     | 626.15  | 525.47  | 619.99  | 638.06  | 600.65  | 658.68  |
| HRASLS    | 430.83  | 390.80  | 413.81  | 391.27  | 419.16  | 392.00  |
| HEY1      | 1881.82 | 1649.42 | 1694.87 | 1747.76 | 1812.52 | 1778.13 |
| SPHK1     | 188.59  | 171.63  | 181.56  | 173.33  | 183.46  | 185.39  |
| AUTS2     | 272.83  | 233.45  | 263.01  | 242.87  | 262.62  | 261.50  |
| SLC24A3   | 3474.81 | 2996.30 | 3037.47 | 3052.50 | 3617.58 | 3788.91 |
| RGS9      | 446.05  | 556.30  | 618.82  | 571.05  | 428.62  | 451.07  |
| SPSB1     | 525.76  | 723.62  | 692.42  | 699.95  | 545.76  | 538.12  |
| AGGF1     | 730.21  | 641.56  | 669.94  | 689.93  | 705.90  | 687.04  |
| HS3ST2    | 201.25  | 224.33  | 219.47  | 204.56  | 207.12  | 210.29  |
| PPP1R1B   | 447.71  | 579.56  | 561.10  | 540.40  | 461.81  | 438.68  |
| SERINC2   | 173.64  | 198.93  | 190.00  | 192.46  | 178.75  | 188.86  |
| ZDHHC9    | 342.63  | 434.80  | 413.25  | 384.49  | 354.69  | 365.45  |
| HDAC11    | 652.14  | 561.43  | 646.75  | 573.83  | 629.45  | 638.18  |
| OG9X      | 173.06  | 195.53  | 176.69  | 178.27  | 167.97  | 170.51  |
| DBP       | 2433.97 | 2024.49 | 2370.01 | 2374.54 | 2342.47 | 2152.20 |
| MARCKSL1  | 345.14  | 270.70  | 330.30  | 318.97  | 356.32  | 376.71  |
| ISLR2     | 731.94  | 968.39  | 790.27  | 827.55  | 670.33  | 741.76  |
| TMEM38A   | 509.84  | 584.14  | 521.37  | 540.57  | 492.66  | 530.52  |
| VAT1L     | 1087.26 | 920.50  | 943.19  | 1099.46 | 1047.12 | 1094.54 |
| PDLIM1    | 421.92  | 522.82  | 480.35  | 464.58  | 433.89  | 445.82  |
| MMD       | 8482.89 | 7429.00 | 7817.46 | 8419.75 | 8233.30 | 8384.10 |
| VANGL2    | 282.49  | 338.08  | 310.16  | 313.27  | 288.44  | 284.02  |
| HKDC1     | 348.57  | 277.23  | 300.78  | 314.74  | 338.41  | 360.98  |
| D12ERTD6  | 915.64  | 1105.71 | 1097.55 | 1096.81 | 934.58  | 888.64  |
| BHLHB5    | 249.12  | 196.43  | 217.38  | 241.43  | 237.05  | 249.49  |
| DCLK1     | 5309.08 | 5845.87 | 5358.84 | 5536.80 | 5426.92 | 5851.93 |
| ARPP21    | 5417.17 | 4769.25 | 5119.25 | 5156.64 | 5308.69 | 5420.91 |

|           |         |         |         |         |         |         |
|-----------|---------|---------|---------|---------|---------|---------|
| 2810022LC | 273.70  | 233.00  | 264.96  | 256.97  | 281.76  | 287.37  |
| 3110035E1 | 5513.09 | 6445.62 | 6082.39 | 6396.53 | 5664.65 | 5964.72 |
| BCL11B    | 1427.67 | 1721.76 | 1772.31 | 1763.39 | 1472.74 | 1429.29 |
| ARHGAP29  | 322.49  | 290.55  | 303.67  | 305.72  | 315.97  | 320.13  |
| B3GNT8    | 164.76  | 143.54  | 158.46  | 154.82  | 160.39  | 159.98  |
| LRRTM2    | 706.84  | 806.81  | 738.34  | 783.44  | 725.77  | 688.12  |
| MAPK4     | 278.03  | 243.79  | 253.20  | 257.42  | 272.60  | 262.83  |
| RNF144A   | 467.14  | 401.80  | 432.28  | 484.11  | 480.24  | 490.50  |
| FOXN3     | 359.62  | 424.53  | 403.54  | 379.58  | 349.20  | 332.17  |
| PIK3R3    | 1187.29 | 1434.08 | 1228.86 | 1276.70 | 1158.59 | 1157.54 |
| CHN2      | 980.66  | 888.74  | 891.89  | 986.77  | 998.18  | 980.46  |
| NXPH2     | 321.93  | 377.02  | 341.24  | 344.33  | 331.06  | 328.48  |
| FANCD2    | 250.87  | 311.61  | 309.35  | 282.76  | 255.54  | 252.15  |
| DOCK4     | 518.71  | 445.36  | 457.82  | 451.84  | 505.19  | 513.24  |
| SLC39A10  | 705.56  | 565.26  | 573.47  | 594.46  | 736.76  | 733.99  |
| MEF2C     | 5061.75 | 4151.96 | 4717.64 | 4632.15 | 5167.78 | 4596.98 |
| SEMA3F    | 223.14  | 248.10  | 239.83  | 239.48  | 218.99  | 219.25  |
| IGSF21    | 738.35  | 980.74  | 880.79  | 880.45  | 716.54  | 738.39  |
| PPM2C     | 564.01  | 486.89  | 491.18  | 515.53  | 553.51  | 523.49  |
| GJB6      | 1879.40 | 1500.93 | 1581.09 | 1605.20 | 1923.77 | 2008.96 |
| YWHAZ     | 7326.44 | 6495.13 | 7192.16 | 7008.91 | 7191.60 | 7357.89 |
| SYNE1     | 1317.36 | 1122.68 | 1130.12 | 1154.03 | 1291.57 | 1178.14 |
| RAI14     | 377.14  | 490.11  | 478.38  | 498.71  | 383.77  | 373.36  |
| RASGRF2   | 160.73  | 145.56  | 151.04  | 157.30  | 162.96  | 157.08  |
| AGPAT4    | 632.47  | 735.58  | 770.45  | 720.51  | 645.04  | 623.76  |
| GARNL3    | 3111.10 | 3929.62 | 3485.82 | 3424.77 | 3183.61 | 3047.90 |
| PRR13     | 2259.57 | 2043.92 | 2155.98 | 2138.58 | 2232.08 | 2352.09 |
| SCCPDH    | 3674.87 | 3155.48 | 3695.48 | 3582.46 | 3728.55 | 3737.46 |
| PDZRN3    | 675.29  | 464.16  | 518.09  | 565.16  | 684.88  | 754.68  |
| GFM1      | 237.02  | 269.98  | 236.99  | 232.07  | 233.75  | 243.52  |
| GRB7      | 170.83  | 193.71  | 186.30  | 187.09  | 172.83  | 179.57  |
| EFNA5     | 1454.37 | 1237.09 | 1340.07 | 1242.22 | 1433.79 | 1403.20 |
| COBL      | 510.36  | 442.30  | 494.33  | 462.78  | 517.51  | 522.71  |
| LOC100041 | 509.25  | 423.93  | 496.10  | 564.95  | 500.51  | 512.43  |
| KRT12     | 798.13  | 651.34  | 652.84  | 649.98  | 788.71  | 785.70  |
| RPH3A     | 1019.21 | 1170.50 | 1051.98 | 1015.18 | 1030.49 | 1100.79 |
| B2M       | 2120.13 | 1922.61 | 2287.40 | 2135.58 | 2103.02 | 2141.42 |
| DDAH1     | 2335.58 | 2778.16 | 2719.25 | 2637.77 | 2306.61 | 2173.58 |
| AW049604  | 735.76  | 642.00  | 701.70  | 686.61  | 728.07  | 708.46  |
| OGFRL1    | 1850.47 | 2215.60 | 1924.08 | 2173.10 | 1871.61 | 1776.90 |
| SDK1      | 212.21  | 236.58  | 244.32  | 230.62  | 213.62  | 212.66  |
| TNFRSF19  | 306.00  | 264.12  | 293.35  | 285.22  | 307.80  | 294.36  |
| PHLDA3    | 376.51  | 416.07  | 394.19  | 382.81  | 374.31  | 381.36  |

|          |         |         |         |         |         |         |
|----------|---------|---------|---------|---------|---------|---------|
| WHRN     | 488.05  | 548.20  | 550.86  | 542.56  | 490.67  | 489.83  |
| LY6G6E   | 203.15  | 239.89  | 221.57  | 229.51  | 202.03  | 194.69  |
| RBP1     | 207.50  | 178.82  | 193.55  | 189.03  | 206.60  | 195.47  |
| TAC1     | 497.81  | 559.88  | 549.63  | 540.89  | 499.75  | 526.13  |
| WNT2     | 225.73  | 256.38  | 251.13  | 250.95  | 226.74  | 240.86  |
| BC064033 | 165.23  | 146.40  | 157.02  | 152.50  | 165.76  | 164.01  |
| KLF7     | 1347.77 | 1583.65 | 1388.04 | 1424.63 | 1354.48 | 1397.90 |
| DKKL1    | 328.91  | 282.41  | 298.58  | 302.60  | 327.49  | 326.08  |
| SAMD9L   | 279.71  | 322.76  | 330.02  | 294.42  | 278.45  | 279.08  |
| IGFBP2   | 225.21  | 198.58  | 211.95  | 209.89  | 225.82  | 225.08  |
| CNTNAP4  | 829.68  | 1049.15 | 958.28  | 1044.39 | 826.29  | 836.71  |
| TCF19    | 189.50  | 171.58  | 184.79  | 187.11  | 189.03  | 185.36  |
| ENSMUSG  | 219.67  | 257.36  | 262.19  | 258.44  | 219.33  | 204.73  |
| NRIP3    | 2235.97 | 2759.90 | 2442.87 | 2549.27 | 2241.60 | 2358.07 |
| ARNTL    | 480.37  | 408.99  | 402.87  | 447.18  | 479.08  | 527.21  |
| OLFML2B  | 354.31  | 405.01  | 357.14  | 375.57  | 354.57  | 354.81  |
| LRFN2    | 417.14  | 500.49  | 462.73  | 471.15  | 416.79  | 410.72  |
