# Supplementary material for: Molecular laterality encodes stress susceptibility in the medial prefrontal cortex
Source: PubMed Central journal article supplement (PMC8201740; doi:10.1186/s13041-021-00802-w), 2021-06-14
Supplement: 13041_2021_802_MOESM6_ESM.pdf [file 13041_2021_802_MOESM6_ESM.pdf]

**Supplementary table 4**

The 526 genes exhibiting laterality listed, according to their  $\log_2$  L/R values. Laterality genes with positive values are expressed more highly in the left mPFC, and those with negative values are expressed more highly in the right mPFC. The genes used in rank order analysis in Figure 1e.

| <b>DEG</b>  | <b>Log2(L/R)</b>   | <b>DEG</b>  | <b>Log2(L/R)</b> | <b>DEG</b>  | <b>Log2(L/R)</b> |
|-------------|--------------------|-------------|------------------|-------------|------------------|
| <b>Gene</b> | <b>Susceptible</b> | <b>Gene</b> | <b>Resilient</b> | <b>Gene</b> | <b>Control</b>   |
| CUX2        | 0.93               | S100A8      | 0.36             | MEGF9       | 0.40             |
| WFS1        | 0.83               | ACTR1A      | 0.31             | CPLX2       | 0.34             |
| TNNC1       | 0.78               | GBP2        | 0.31             | NETO1       | 0.27             |
| STARD8      | 0.57               | NPM3-PS1    | 0.27             | FUT9        | 0.26             |
| CAR4        | 0.56               | LYZ         | 0.25             | OPALIN      | 0.25             |
| PDZRN3      | 0.54               | WFS1        | 0.24             | LPGAT1      | 0.24             |
| VIP         | <b>0.53</b>        | SCN4B       | 0.22             | SLC35F3     | 0.24             |
| SLC13A4     | 0.52               | IFITM3      | 0.22             | PRR18       | 0.22             |
| DDIT4L      | 0.51               | BTBD3       | 0.21             | SULF1       | 0.22             |
| IGF2        | 0.51               | MFGE8       | 0.20             | NOS1AP      | 0.21             |
| EGR2        | 0.50               | PLLPL       | 0.20             | EVI2A       | 0.21             |
| EVC2        | 0.49               | CNP         | 0.19             | ANO4        | 0.20             |
| CDKN1C      | 0.49               | DUSP1       | 0.19             | KCNA1       | 0.19             |
| EGR4        | 0.48               | HIST1H2AC   | 0.19             | MOG         | 0.18             |
| CPNE6       | 0.48               | RIMS3       | 0.18             | HTR1F       | 0.17             |
| CPNE4       | 0.47               | SCD1        | 0.18             | MYL4        | 0.17             |
| DCN         | 0.47               | MORN4       | 0.18             | MAL         | 0.17             |
| LOC100041   | 0.45               | JOSD1       | 0.17             | BTBD3       | 0.17             |
| BHLHB2      | 0.43               | HDAC11      | 0.17             | MEF2C       | 0.17             |
| PVRL3       | 0.42               | CUX2        | 0.17             | FA2H        | 0.16             |
| TIAM1       | 0.40               | ZBTB8B      | 0.17             | TLE4        | 0.16             |
| RILPL1      | 0.39               | MT3         | 0.17             | DUSP1       | 0.16             |
| BTBD3       | 0.38               | SAMD9L      | 0.16             | ZFPM2       | 0.16             |
| JUNB        | 0.38               | DNAJB1      | 0.16             | NEFM        | 0.15             |
| PALMD       | 0.38               | ARC         | 0.16             | GJC2        | 0.15             |
| CPNE9       | 0.37               | CAMK2A      | 0.16             | IL11RA1     | 0.15             |
| LOC100041   | 0.36               | INA         | 0.16             | KCNK13      | 0.15             |
| C1QTNF4     | 0.36               | UACA        | 0.15             | CLDN11      | 0.15             |
| DACT2       | 0.36               | S100A6      | 0.15             | PLEKHA2     | 0.15             |
| LPL         | 0.36               | PCTK1       | 0.14             | PLEKHB1     | 0.15             |
| RELN        | 0.36               | PLEKHB1     | 0.14             | TSPAN2      | 0.14             |

|           |      |           |      |           |      |
|-----------|------|-----------|------|-----------|------|
| GRASP     | 0.35 | MGP       | 0.14 | ODZ3      | 0.14 |
| SPAG5     | 0.35 | ACSL5     | 0.14 | SOX5      | 0.14 |
| MARCKSL1  | 0.35 | MAL       | 0.14 | S100A8    | 0.14 |
| RREB1     | 0.35 | REEP5     | 0.14 | LGI2      | 0.14 |
| RIMS3     | 0.35 | FANCD2    | 0.13 | CTGF      | 0.14 |
| MGP       | 0.35 | FSTL4     | 0.13 | DBNDD2    | 0.14 |
| PRELP     | 0.35 | TRIB2     | 0.13 | SEMA5A    | 0.13 |
| BHLHB5    | 0.34 | COTL1     | 0.13 | SYNE1     | 0.13 |
| HPCA      | 0.34 | NPTX2     | 0.13 | MYO5B     | 0.13 |
| OGN       | 0.34 | SLC44A1   | 0.13 | MBP       | 0.13 |
| PDYN      | 0.34 | MAG       | 0.12 | CRYAB     | 0.13 |
| D8ERTD82  | 0.34 | OLFML3    | 0.12 | CNP       | 0.13 |
| HBA-A1    | 0.33 | NGFRAP1   | 0.12 | RPRM      | 0.12 |
| IGSF3     | 0.33 | PLXNB3    | 0.12 | LITAF     | 0.12 |
| GJB2      | 0.33 | NBL1      | 0.12 | ODZ4      | 0.12 |
| GCNT2     | 0.33 | RASL11B   | 0.12 | MOBP      | 0.12 |
| HKDC1     | 0.33 | OPRK1     | 0.12 | DBP       | 0.12 |
| 6030405A  | 0.33 | MEGF9     | 0.12 | GRIK1     | 0.12 |
| EFCAB1    | 0.33 | RGS9      | 0.12 | PLLP      | 0.12 |
| LYZ       | 0.32 | AUTS2     | 0.11 | STAC2     | 0.12 |
| GJB6      | 0.32 | DUSP18    | 0.11 | PIGZ      | 0.12 |
| FOSB      | 0.32 | HSD11B1   | 0.11 | NFE2L3    | 0.12 |
| SLC39A10  | 0.32 | EFNA5     | 0.11 | COCH      | 0.12 |
| SLC6A13   | 0.32 | ADSSL1    | 0.11 | UGT8A     | 0.12 |
| RTN4RL1   | 0.31 | PDLIM2    | 0.11 | OPRK1     | 0.11 |
| CITED4    | 0.31 | ZDHHC9    | 0.10 | GLTP      | 0.11 |
| FAM148C   | 0.31 | CIB2      | 0.10 | ANLN      | 0.11 |
| LOC10004  | 0.30 | DBNDD2    | 0.10 | DRD1A     | 0.11 |
| COCH      | 0.30 | PROSAP1   | 0.10 | PLP1      | 0.11 |
| OTOF      | 0.30 | HS3ST2    | 0.10 | ARSG      | 0.11 |
| FSTL4     | 0.30 | ADCYAP1   | 0.10 | BCAS1     | 0.10 |
| PLCH2     | 0.29 | CDKN1C    | 0.10 | CHRM2     | 0.10 |
| KRT12     | 0.29 | B2M       | 0.10 | GLRA2     | 0.10 |
| SLC7A11   | 0.29 | ITPKA     | 0.10 | EFHD1     | 0.10 |
| 2510009EC | 0.29 | ITGB4     | 0.10 | NMRAL1    | 0.10 |
| PKNOX2    | 0.29 | TMEM125   | 0.10 | ENSMUSG1  | 0.10 |
| CACNG3    | 0.29 | D930015E0 | 0.10 | PPP1R14A  | 0.10 |
| BDNF      | 0.29 | AGPAT4    | 0.10 | ELOVL6    | 0.10 |
| ECHDC2    | 0.29 | SYTL2     | 0.10 | CARHSP1   | 0.10 |
| MEF2C     | 0.29 | COBL      | 0.10 | LOC100040 | 0.10 |
| TLE1      | 0.28 | CDC42EP4  | 0.09 | HRASLS    | 0.10 |
| ZIC1      | 0.28 | LGI2      | 0.09 | NIPA1     | 0.09 |
| FOS       | 0.28 | PRKG2     | 0.09 | THAP3     | 0.09 |

|           |      |           |      |          |      |
|-----------|------|-----------|------|----------|------|
| DUSP6     | 0.28 | SLC1A3    | 0.09 | CDC42EP2 | 0.09 |
| PER2      | 0.27 | FOXN3     | 0.09 | SC4MOL   | 0.09 |
| PER1      | 0.27 | PRELP     | 0.09 | AGAP1    | 0.09 |
| MFGE8     | 0.27 | SLC35F3   | 0.09 | NGFRAP1  | 0.09 |
| CDH8      | 0.27 | MBP       | 0.09 | NDRG1    | 0.09 |
| ARC       | 0.27 | EPHX1     | 0.09 | LASS2    | 0.09 |
| NBL1      | 0.27 | ADAMTS4   | 0.09 | MAG      | 0.09 |
| NEURL     | 0.27 | SLC13A4   | 0.09 | NRP1     | 0.09 |
| SERPINF1  | 0.27 | CDC42EP2  | 0.09 | DDAH1    | 0.09 |
| ADCYAP1   | 0.27 | PRR18     | 0.09 | WASF1    | 0.08 |
| TGM2      | 0.27 | LOC10004  | 0.09 | PBRM1    | 0.08 |
| 1300013J1 | 0.27 | SDK1      | 0.08 | FOS      | 0.08 |
| SLC2A1    | 0.27 | IGF2      | 0.08 | INSC     | 0.08 |
| GUCY1A3   | 0.27 | DARC      | 0.08 | TRIM59   | 0.08 |
| PTPRK     | 0.27 | MYL4      | 0.08 | EGR2     | 0.08 |
| DBP       | 0.27 | BC030499  | 0.08 | ARC      | 0.08 |
| FMO1      | 0.27 | ANLN      | 0.08 | PPM2C    | 0.08 |
| HAP1      | 0.27 | HRASLS    | 0.08 | RBP1     | 0.08 |
| VGf       | 0.27 | LMO3      | 0.08 | TPBG     | 0.08 |
| LOC10004  | 0.26 | TLE1      | 0.08 | SLC44A1  | 0.08 |
| VASN      | 0.26 | 2510009EC | 0.08 | FIGN     | 0.08 |
| KCTD4     | 0.26 | CAMTA2    | 0.08 | RASL11B  | 0.08 |
| 2810405KC | 0.26 | H47       | 0.07 | LOC10004 | 0.08 |
| HSPA2     | 0.26 | IL33      | 0.07 | LRRTM2   | 0.08 |
| LOC10004  | 0.26 | NR2F6     | 0.07 | MT3      | 0.08 |
| LINGO2    | 0.26 | ATG16L1   | 0.07 | NPM3-PS1 | 0.08 |
| NR2F6     | 0.26 | ANO4      | 0.07 | SLA      | 0.08 |
| PRKG2     | 0.26 | CD47      | 0.07 | RIMS1    | 0.08 |
| UACA      | 0.26 | THAP3     | 0.07 | OGFRL1   | 0.07 |
| CHST1     | 0.26 | CSF1R     | 0.07 | PPP1R1B  | 0.07 |
| ODZ4      | 0.25 | 5330439J0 | 0.07 | PDLIM2   | 0.07 |
| S100A11   | 0.25 | HAPLN2    | 0.07 | D12ERTD6 | 0.07 |
| TMCC2     | 0.25 | HAP1      | 0.07 | FOXN3    | 0.07 |
| RANBP3L   | 0.25 | CLDN11    | 0.07 | IL33     | 0.07 |
| SLC4A3    | 0.25 | FCHO1     | 0.07 | NFIB     | 0.07 |
| S100A8    | 0.25 | SPHK1     | 0.07 | SYT17    | 0.07 |
| CCK       | 0.25 | SERGEF    | 0.07 | ELAVL2   | 0.07 |
| ANXA11    | 0.25 | FBF1      | 0.06 | LRRN1    | 0.07 |
| CACNA1H   | 0.24 | CHRM2     | 0.06 | STK4     | 0.07 |
| EPHX1     | 0.24 | CRTAC1    | 0.06 | DCBLD1   | 0.07 |
| ACSL5     | 0.24 | CPLX2     | 0.06 | CADPS2   | 0.06 |
| BMP1      | 0.24 | BOK       | 0.06 | TNFRSF19 | 0.06 |
| VAT1L     | 0.24 | FA2H      | 0.06 | GARNL3   | 0.06 |

|           |      |           |      |           |      |
|-----------|------|-----------|------|-----------|------|
| FBF1      | 0.24 | NETO1     | 0.06 | GADD45A   | 0.06 |
| ANKRD6    | 0.24 | LYZ2      | 0.06 | AGFG1     | 0.06 |
| WASF1     | 0.24 | CTGF      | 0.06 | HIST2H3B  | 0.06 |
| FCHO1     | 0.24 | PDE4D     | 0.06 | PRSS35    | 0.06 |
| ZFP148    | 0.23 | AI593442  | 0.06 | RNMT      | 0.06 |
| DUSP1     | 0.23 | UBQLN4    | 0.06 | ACTR1A    | 0.06 |
| EFNA5     | 0.23 | PALMD     | 0.06 | OLIG1     | 0.06 |
| PNCK      | 0.23 | FAM148C   | 0.06 | UNC5B     | 0.06 |
| 2810022LC | 0.23 | ARHGAP25  | 0.06 | ATP8B1    | 0.06 |
| ARNTL     | 0.23 | SERPINF1  | 0.06 | BC067047  | 0.05 |
| DARC      | 0.23 | AKAP8L    | 0.05 | 1700019D1 | 0.05 |
| CALB2     | 0.23 | CITED4    | 0.05 | HBA-A1    | 0.05 |
| SYNE1     | 0.23 | PPP1R1B   | 0.05 | LY6G6E    | 0.05 |
| CDH7      | 0.23 | KCTD4     | 0.05 | ADSSL1    | 0.05 |
| OSBP2     | 0.23 | SPOP      | 0.05 | RASGRF2   | 0.05 |
| AUTS2     | 0.22 | 4930544G2 | 0.05 | MAPK4     | 0.05 |
| CBLN4     | 0.22 | RPH3A     | 0.05 | AGPAT4    | 0.05 |
| C1QC      | 0.22 | MARCKSL1  | 0.05 | GPR83     | 0.05 |
| DUSP18    | 0.22 | RPRM      | 0.05 | C130090K2 | 0.05 |
| ACCN2     | 0.22 | KCNK6     | 0.05 | RGS4      | 0.05 |
| NPY1R     | 0.22 | CACNA1H   | 0.05 | H2-T23    | 0.05 |
| ARSJ      | 0.22 | PDLIM1    | 0.05 | SCN4B     | 0.05 |
| CDC42EP4  | 0.22 | TMEM178   | 0.05 | DIAP3     | 0.05 |
| KLF2      | 0.22 | PRDX3     | 0.05 | LMO3      | 0.05 |
| TRIB2     | 0.22 | GPR83     | 0.05 | TRF       | 0.04 |
| CLCN2     | 0.22 | SCCPDH    | 0.04 | CD47      | 0.04 |
| DOCK4     | 0.22 | ERDR1     | 0.04 | PLXNB3    | 0.04 |
| DKKL1     | 0.22 | DIAP3     | 0.04 | GM129     | 0.04 |
| SCCPDH    | 0.22 | RHBDL3    | 0.04 | TGM2      | 0.04 |
| SLC26A4   | 0.22 | GPR21     | 0.04 | BCL11B    | 0.04 |
| ITPKA     | 0.22 | 2810022LC | 0.04 | DUSP6     | 0.04 |
| SLC2A13   | 0.22 | RNF19A    | 0.04 | TMEM63A   | 0.04 |
| RNF144A   | 0.22 | DDAH1     | 0.04 | HIST1H2AC | 0.04 |
| ANXA2     | 0.22 | NOS1AP    | 0.04 | RAI14     | 0.04 |
| HDAC11    | 0.22 | OPALIN    | 0.04 | GAB1      | 0.04 |
| RNF19A    | 0.22 | SOX5      | 0.04 | CDC42EP4  | 0.04 |
| RBP1      | 0.21 | SST       | 0.04 | AW049604  | 0.04 |
| CASP1     | 0.21 | OTOP2     | 0.04 | AGGF1     | 0.04 |
| SLC24A3   | 0.21 | ZFP810    | 0.04 | AB112350  | 0.04 |
| LYZ2      | 0.21 | PHLDA3    | 0.04 | ATP5F1    | 0.04 |
| TNFRSF19  | 0.21 | LINGO2    | 0.04 | LOC10004  | 0.03 |
| PPM2C     | 0.21 | BC064033  | 0.04 | 5330439J0 | 0.03 |
| DLK2      | 0.21 | SEPT5     | 0.04 | WDR60     | 0.03 |

|           |      |           |      |           |      |
|-----------|------|-----------|------|-----------|------|
| SCHIP1    | 0.21 | OTX1      | 0.04 | ADRA2A    | 0.03 |
| 2310021P1 | 0.21 | TNFRSF19  | 0.04 | BC030499  | 0.03 |
| ZDHHC14   | 0.21 | FHL1      | 0.04 | ARSJ      | 0.03 |
| BC067047  | 0.21 | BC067047  | 0.04 | EFNA5     | 0.03 |
| COBL      | 0.21 | INPPL1    | 0.04 | DOK4      | 0.03 |
| ZBTB7C    | 0.21 | TTYH2     | 0.04 | HSD11B1   | 0.03 |
| ERDR1     | 0.21 | 4930511J1 | 0.04 | ST8SIA2   | 0.03 |
| TRPC7     | 0.21 | EMID2     | 0.04 | CPNE8     | 0.03 |
| FHL1      | 0.21 | HPCA      | 0.04 | NEURL     | 0.03 |
| B930076A  | 0.20 | EXTL3     | 0.04 | RANBP3L   | 0.03 |
| MARCH4    | 0.20 | DDIT4L    | 0.04 | OSBP2     | 0.03 |
| SYT17     | 0.20 | PVRL3     | 0.04 | TCF19     | 0.03 |
| 4933439C2 | 0.20 | DOK4      | 0.04 | ADAMTS4   | 0.03 |
| CD83      | 0.20 | TPD52L1   | 0.04 | HEY1      | 0.03 |
| AKAP8L    | 0.20 | GRIK1     | 0.04 | FGF10     | 0.03 |
| SERGEF    | 0.20 | YWHAZ     | 0.04 | GBP2      | 0.03 |
| NPTX2     | 0.20 | TBC1D13   | 0.04 | RNF19A    | 0.03 |
| CAMK2A    | 0.20 | PADI6     | 0.04 | CD82      | 0.03 |
| B3GNT8    | 0.20 | DRD1A     | 0.03 | CHN2      | 0.03 |
| MEGF9     | 0.20 | RBP1      | 0.03 | QDPR      | 0.02 |
| MYOC      | 0.20 | CAMK1G    | 0.03 | AI314976  | 0.02 |
| PSME1     | 0.20 | ARSG      | 0.03 | ASAH2     | 0.02 |
| IFITM3    | 0.20 | B3GNT8    | 0.03 | LYZ2      | 0.02 |
| DNAJB1    | 0.20 | NEURL     | 0.03 | MYOC      | 0.02 |
| EXTL3     | 0.20 | NRP1      | 0.03 | VANGL2    | 0.02 |
| AW049604  | 0.20 | ECHDC2    | 0.03 | ADAMTSL2  | 0.02 |
| SLC1A3    | 0.20 | HBA-A1    | 0.03 | OTOF      | 0.02 |
| 5330439J0 | 0.20 | AW049604  | 0.03 | LRFN2     | 0.02 |
| CAMTA2    | 0.20 | GFM1      | 0.03 | KHDRBS2   | 0.02 |
| ADAMTSL2  | 0.19 | PACS2     | 0.03 | FAM132B   | 0.02 |
| MMD       | 0.19 | PSME1     | 0.03 | CHST1     | 0.02 |
| WNT4      | 0.19 | NDST1     | 0.03 | ITGB4     | 0.02 |
| ACTA2     | 0.19 | CACNB3    | 0.03 | DNAJB1    | 0.02 |
| LOC10004  | 0.19 | SLC7A11   | 0.03 | SPSB1     | 0.02 |
| HEY1      | 0.19 | CARHSP1   | 0.03 | LOC10004  | 0.02 |
| SYTL2     | 0.19 | CALB2     | 0.03 | 2810405KC | 0.02 |
| 4930511J1 | 0.19 | MEF2C     | 0.03 | BCL9L     | 0.02 |
| GM129     | 0.19 | RILPL1    | 0.03 | FANCD2    | 0.02 |
| MAPK4     | 0.19 | CRYAB     | 0.03 | LINGO2    | 0.02 |
| EXDL2     | 0.19 | GARNL3    | 0.03 | ADORA1    | 0.02 |
| BOK       | 0.19 | KCNK13    | 0.03 | PIGP      | 0.02 |
| NAPEPLD   | 0.19 | BDNF      | 0.03 | DYNC1LI2  | 0.02 |
| CGGBP1    | 0.19 | HTR1F     | 0.02 | INPPL1    | 0.02 |

|           |      |           |             |           |      |
|-----------|------|-----------|-------------|-----------|------|
| RHBDL3    | 0.19 | TRPC7     | 0.02        | JUNB      | 0.02 |
| AGGF1     | 0.19 | IGSF3     | 0.02        | FAM134B   | 0.02 |
| RXFP3     | 0.19 | ODZ3      | 0.02        | BC064033  | 0.02 |
| 4930544G  | 0.19 | TAC1      | 0.02        | EGR4      | 0.01 |
| FKBP1A    | 0.19 | FBXO32    | 0.02        | TLE1      | 0.01 |
| EHMT2     | 0.18 | WHRN      | 0.02        | ARHGAP25  | 0.01 |
| ARPP21    | 0.18 | GAL3ST1   | 0.02        | 6330503K2 | 0.01 |
| GTPBP6    | 0.18 | NMRAL1    | 0.02        | CASP1     | 0.01 |
| SEPT5     | 0.18 | ADORA1    | 0.02        | SLC26A4   | 0.01 |
| IGFBP2    | 0.18 | ENSMUSG1  | 0.02        | RGS6      | 0.01 |
| GPR83     | 0.18 | MOBP      | 0.02        | LPL       | 0.01 |
| OTOP2     | 0.18 | ZYX       | 0.02        | ZIC1      | 0.01 |
| FAM13C    | 0.18 | DOCK4     | 0.02        | NXPH2     | 0.01 |
| AI593442  | 0.18 | OSBP2     | 0.02        | RAB5A     | 0.01 |
| BC030499  | 0.18 | RANBP3L   | 0.02        | GAL3ST1   | 0.01 |
| WDR60     | 0.18 | RHOG      | 0.02        | TMEM125   | 0.01 |
| KHDRBS2   | 0.18 | PIGZ      | 0.02        | EPHA7     | 0.01 |
| PCK1      | 0.18 | CGGBP1    | 0.02        | D8ERTD82  | 0.01 |
| SULT1A1   | 0.18 | AB182283  | 0.02        | DDIT4L    | 0.01 |
| NAV1      | 0.18 | GJC2      | 0.02        | SDK1      | 0.01 |
| TPD52L1   | 0.17 | AI314976  | 0.02        | DKKL1     | 0.01 |
| BC064033  | 0.17 | GTPBP6    | 0.02        | AUTS2     | 0.01 |
| YWHAZ     | 0.17 | NTSR1     | 0.02        | EG434858  | 0.01 |
| UBQLN4    | 0.17 | FOSB      | 0.02        | KRT12     | 0.01 |
| CAMKK1    | 0.17 | LITAF     | 0.02        | SLC39A10  | 0.01 |
| MAPRE2    | 0.17 | S100A11   | 0.02        | TTYH2     | 0.01 |
| MORN4     | 0.17 | ANXA11    | 0.01        | CDH7      | 0.00 |
| NOL4      | 0.17 | CLCN2     | 0.01        | IGFBP2    | 0.00 |
| ST8SIA2   | 0.17 | IGFBP2    | 0.01        | GPR21     | 0.00 |
| MID1      | 0.17 | FAM132B   | 0.01        | B3GNT8    | 0.00 |
| JOSD1     | 0.17 | ANXA3     | 0.01        | PLEKHG3   | 0.00 |
| ETS1      | 0.17 | FGF10     | 0.01        | GUCY1A3   | 0.00 |
| LOC100041 | 0.17 | LOC100041 | 0.01        | D930028F1 | 0.00 |
| CSF1R     | 0.17 | WNT4      | 0.01        | WHRN      | 0.00 |
| RYR1      | 0.17 | CPNE4     | 0.01        | ACTA2     | 0.00 |
| TCF4      | 0.17 | CLCN4-2   | 0.01        | ATG16L1   | 0.00 |
| LOC100041 | 0.17 | ADAMTSL2  | 0.01        | PIK3R3    | 0.00 |
| NPM3-PS1  | 0.17 | RIMS1     | 0.01        | PADI6     | 0.00 |
| CYP1B1    | 0.17 | PRR13     | 0.01        | LOC100041 | 0.00 |
| PROSAP1   | 0.17 | COL5A1    | 0.01        | PEBP1     | 0.00 |
| MKX       | 0.17 | DYNC1LI2  | 0.01        | PCK1      | 0.00 |
| NGFRAP1   | 0.16 | INSC      | 0.01        | NEU2      | 0.00 |
| RGS6      | 0.16 | VIP       | <b>0.01</b> | OLFML2B   | 0.00 |

|           |      |           |       |          |              |
|-----------|------|-----------|-------|----------|--------------|
| H47       | 0.16 | JUNB      | 0.01  | SEMA3F   | 0.00         |
| BCL9L     | 0.16 | RAMP3     | 0.01  | FBXO32   | 0.00         |
| TBC1D13   | 0.16 | ANKRD6    | 0.01  | H47      | 0.00         |
| ZBTB8B    | 0.16 | SEMA5A    | 0.01  | CAMKK1   | 0.00         |
| RGL1      | 0.16 | LOC10004  | 0.01  | LOC10004 | 0.00         |
| HIST2H3B  | 0.16 | HSPA2     | 0.01  | CCK      | 0.00         |
| ZFP810    | 0.16 | CHST1     | 0.01  | SAMD9L   | 0.00         |
| COTL1     | 0.16 | EFCAB1    | 0.01  | SCCPDH   | 0.00         |
| HIST1H2AC | 0.16 | BMP1      | 0.01  | TIAM1    | 0.00         |
| EMID2     | 0.16 | FMO1      | 0.01  | SERPINF1 | 0.00         |
| EFEMP2    | 0.16 | BCL11B    | 0.01  | TRPC7    | 0.00         |
| CIB2      | 0.16 | EHMT2     | 0.01  | AB182283 | -0.01        |
| CACNB3    | 0.16 | SULT1A1   | 0.01  | NDST1    | -0.01        |
| PDE4D     | 0.16 | KRT12     | 0.01  | TRIM36   | -0.01        |
| AB112350  | 0.15 | ZDHHC14   | 0.01  | CITED4   | -0.01        |
| FBXL10    | 0.15 | EGR4      | 0.00  | PVRL3    | -0.01        |
| RGS4      | 0.15 | LOC10004  | 0.00  | ADAMTSL4 | -0.01        |
| AGFG1     | 0.15 | EFHD1     | 0.00  | TCF4     | -0.01        |
| D930015E  | 0.15 | EFEMP2    | 0.00  | BDNF     | -0.01        |
| KCNK6     | 0.15 | SEMA3F    | 0.00  | ABCA8A   | -0.01        |
| ANXA3     | 0.15 | THSD7B    | 0.00  | C1QC     | -0.01        |
| ARHGAP2C  | 0.15 | ZFP148    | 0.00  | JOSD1    | -0.01        |
| MT3       | 0.15 | WNT2      | 0.00  | HSD17B11 | -0.01        |
| 6330406I1 | 0.15 | D12ERTD6  | 0.00  | TMEM19   | -0.01        |
| OLFML3    | 0.15 | PPP1R14A  | 0.00  | VSTM2B   | -0.01        |
| SAP130    | 0.15 | IGSF21    | 0.00  | EFEMP2   | -0.01        |
| THBD      | 0.15 | PLCH2     | 0.00  | KCNK6    | -0.01        |
| D930028F  | 0.14 | EDG2      | 0.00  | VIP      | <b>-0.01</b> |
| PRR13     | 0.14 | ZBTB7C    | 0.00  | TMEM178  | -0.01        |
| TCF19     | 0.14 | AB112350  | 0.00  | MID1     | -0.01        |
| RASGRF2   | 0.14 | DBP       | 0.00  | CGGBP1   | -0.01        |
| FLT1      | 0.14 | LOC10004  | 0.00  | OTOP2    | -0.01        |
| S100A6    | 0.14 | SCN3B     | 0.00  | COBL     | -0.01        |
| CHN2      | 0.14 | 2310021P1 | -0.01 | VASN     | -0.01        |
| B2M       | 0.14 | FBXL10    | -0.01 | CAR14    | -0.01        |
| HRASLS    | 0.14 | GRB7      | -0.01 | RHOG     | -0.01        |
| IGSF9     | 0.14 | H2AFY     | -0.01 | LOC10004 | -0.02        |
| SCN3B     | 0.14 | SLC24A3   | -0.01 | SPHK1    | -0.02        |
| HSD11B1   | 0.14 | CPNE9     | -0.01 | ETS1     | -0.02        |
| CPNE8     | 0.14 | RGS6      | -0.01 | CHRNA5   | -0.02        |
| CAMK1G    | 0.14 | LOC10004  | -0.01 | TTC19    | -0.02        |
| SPHK1     | 0.14 | STK4      | -0.01 | S100A6   | -0.02        |
| RASGRF1   | 0.14 | LASS2     | -0.01 | SEPT5    | -0.02        |

|           |       |           |       |           |       |
|-----------|-------|-----------|-------|-----------|-------|
| EPB4.9    | 0.13  | CCK       | -0.01 | ANXA3     | -0.02 |
| ATG16L1   | 0.12  | KIF5A     | -0.01 | CDH8      | -0.02 |
| ACTR1A    | 0.10  | DLK2      | -0.01 | CNTNAP4   | -0.02 |
| GBP2      | 0.01  | STARD8    | -0.01 | CPNE6     | -0.02 |
| FBXO32    | -0.13 | ARHGAP29  | -0.01 | COTL1     | -0.02 |
| COL5A1    | -0.14 | PLEKHG3   | -0.01 | ARHGAP29  | -0.02 |
| EG434858  | -0.14 | ARPP21    | -0.01 | TPD52L1   | -0.02 |
| DCLK1     | -0.14 | BCAS1     | -0.01 | MKX       | -0.02 |
| ADAMTSL4  | -0.14 | 4933439C2 | -0.01 | FCHO1     | -0.02 |
| PHLDA3    | -0.14 | CD82      | -0.01 | HDAC11    | -0.02 |
| MIF4GD    | -0.14 | PNCK      | -0.01 | DARC      | -0.02 |
| INPPL1    | -0.15 | AGFG1     | -0.01 | CYP1B1    | -0.02 |
| DIAP3     | -0.15 | OGN       | -0.01 | UACA      | -0.02 |
| INPP4B    | -0.15 | CASP1     | -0.01 | DUSP18    | -0.02 |
| FAM132B   | -0.15 | MARCH4    | -0.01 | LOC100041 | -0.02 |
| FIGN      | -0.15 | OG9X      | -0.01 | OG9X      | -0.02 |
| AB182283  | -0.15 | NXPH2     | -0.01 | HS3ST2    | -0.02 |
| MTMR2     | -0.15 | PTPRK     | -0.01 | DOCK4     | -0.02 |
| ATP8B1    | -0.15 | C1QC      | -0.01 | EVC2      | -0.02 |
| RAB5A     | -0.15 | KCNA1     | -0.01 | PRKG2     | -0.02 |
| CHRM2     | -0.15 | DUSP6     | -0.01 | FBF1      | -0.02 |
| SEMA3F    | -0.15 | ENPP6     | -0.01 | FKBP1A    | -0.02 |
| MYO5B     | -0.15 | VANGL2    | -0.01 | PRDX3     | -0.02 |
| PIGZ      | -0.16 | KLF2      | -0.01 | PER2      | -0.02 |
| HS3ST2    | -0.16 | SPSB1     | -0.02 | SST       | -0.02 |
| SDK1      | -0.16 | KHDRBS2   | -0.02 | ZYX       | -0.02 |
| ABCA8A    | -0.16 | H2-T23    | -0.02 | ZFP148    | -0.03 |
| ODZ3      | -0.16 | FUT9      | -0.02 | MTMR2     | -0.03 |
| CLCN4-2   | -0.16 | UNC5B     | -0.02 | INPP4B    | -0.03 |
| EPHA7     | -0.16 | SLA       | -0.02 | PDE4D     | -0.03 |
| ELOVL6    | -0.16 | TCF19     | -0.02 | B2M       | -0.03 |
| HSD17B11  | -0.17 | RAPGEF4   | -0.02 | MMD       | -0.03 |
| INSC      | -0.17 | SERINC2   | -0.02 | PHLDA3    | -0.03 |
| WHRN      | -0.17 | CDH8      | -0.02 | INA       | -0.03 |
| FUT9      | -0.17 | DKKL1     | -0.02 | 2810022L0 | -0.03 |
| LGI2      | -0.17 | DACT2     | -0.02 | PALMD     | -0.03 |
| THAP3     | -0.17 | IGSF9     | -0.02 | ARPP21    | -0.03 |
| TAC1      | -0.17 | BCL9L     | -0.02 | RNF144A   | -0.03 |
| STK4      | -0.17 | D930028F1 | -0.02 | SLAIN1    | -0.03 |
| RAMP3     | -0.17 | ACCN2     | -0.02 | SLC1A3    | -0.03 |
| SLC7A4    | -0.17 | GJB6      | -0.02 | YWHAZ     | -0.03 |
| 6330503K2 | -0.17 | DCBLD1    | -0.02 | LOC100041 | -0.03 |
| CDC42EP2  | -0.17 | MIF4GD    | -0.02 | THSD7B    | -0.03 |



|           |       |           |       |           |       |
|-----------|-------|-----------|-------|-----------|-------|
| OG9X      | -0.18 | EXDL2     | -0.02 | ERDR1     | -0.03 |
| OLIG1     | -0.18 | ARSJ      | -0.02 | GCNT2     | -0.03 |
| LMO3      | -0.18 | MAPK4     | -0.02 | CIB2      | -0.03 |
| RYR3      | -0.18 | 1700019D( | -0.02 | PSME1     | -0.04 |
| ELAVL2    | -0.18 | UAP1      | -0.02 | DLK2      | -0.04 |
| RAB3B     | -0.18 | RREB1     | -0.02 | IGSF3     | -0.04 |
| DCBLD1    | -0.18 | RNMT      | -0.02 | SLC7A11   | -0.04 |
| DYNC1LI2  | -0.18 | LOC10004  | -0.02 | 4930544G; | -0.04 |
| CHRNA5    | -0.18 | MOG       | -0.02 | RREB1     | -0.04 |
| NFE2L3    | -0.18 | SCHIP1    | -0.03 | 4930511J1 | -0.04 |
| PIGP      | -0.18 | RGL1      | -0.03 | NTSR1     | -0.04 |
| PRDX3     | -0.18 | GUCY1A3   | -0.03 | H2AFY     | -0.04 |
| TMEM63A   | -0.18 | C1QTNF4   | -0.03 | RELN      | -0.04 |
| GRB7      | -0.18 | SLC26A4   | -0.03 | PDLIM1    | -0.04 |
| GRIK1     | -0.18 | LRFN2     | -0.03 | GRASP     | -0.04 |
| AI314976  | -0.18 | GAB1      | -0.03 | NDRL      | -0.04 |
| TTC19     | -0.18 | TMEM63A   | -0.03 | EFCAB1    | -0.04 |
| WNT2      | -0.18 | VGF       | -0.03 | OTX1      | -0.04 |
| ASAH2     | -0.18 | SLC4A3    | -0.03 | OSBPL9    | -0.04 |
| STAC2     | -0.18 | PLP1      | -0.03 | SCN3B     | -0.04 |
| OPRK1     | -0.18 | EPB4.9    | -0.03 | CSF1R     | -0.04 |
| TRIM36    | -0.18 | ATP8B1    | -0.03 | ZDHHC9    | -0.04 |
| PRSS23    | -0.19 | GRASP     | -0.03 | IGSF21    | -0.04 |
| GFM1      | -0.19 | CYP1B1    | -0.03 | KCTD4     | -0.04 |
| SPOP      | -0.19 | PLEKHA2   | -0.03 | 633040611 | -0.04 |
| H2AFY     | -0.19 | NAV1      | -0.03 | LOC10004( | -0.05 |
| TMEM19    | -0.19 | D8ERTD82  | -0.03 | RELL1     | -0.05 |
| LRRTM2    | -0.19 | SYNE1     | -0.03 | KLF7      | -0.05 |
| CADPS2    | -0.19 | CPNE6     | -0.03 | FMO1      | -0.05 |
| OLFML2B   | -0.19 | EVC2      | -0.03 | MFGE8     | -0.05 |
| SERINC2   | -0.20 | 1300013J1 | -0.03 | EDG2      | -0.05 |
| TMEM38A   | -0.20 | FIGN      | -0.03 | PER1      | -0.05 |
| TMEM125   | -0.20 | 6030405A  | -0.03 | ZBTB8B    | -0.05 |
| CAR14     | -0.20 | B930076A( | -0.03 | PNCK      | -0.05 |
| RPH3A     | -0.20 | INPP4B    | -0.03 | SKP1A     | -0.05 |
| THSD7B    | -0.20 | PEBP1     | -0.03 | EPHX1     | -0.05 |
| SLC35F3   | -0.20 | RASGRF1   | -0.04 | SERGEF    | -0.05 |
| IL11RA1   | -0.20 | PCBP2     | -0.04 | SLC7A4    | -0.05 |
| NDST1     | -0.20 | EVI2A     | -0.04 | TBC1D13   | -0.05 |
| CD47      | -0.21 | SLC6A13   | -0.04 | MARCH4    | -0.05 |
| SAMD9L    | -0.21 | KLF7      | -0.04 | HAPLN2    | -0.05 |
| 1700019D( | -0.21 | HIST2H3B  | -0.04 | CALB2     | -0.05 |
| PLLP      | -0.21 | LOC10004! | -0.04 | SPAG5     | -0.05 |

|           |       |           |       |          |       |
|-----------|-------|-----------|-------|----------|-------|
| DBNDD2    | -0.21 | SYT17     | -0.04 | ANKRD6   | -0.05 |
| CD82      | -0.21 | TMCC2     | -0.04 | CAMTA2   | -0.05 |
| AGAP1     | -0.21 | AGGF1     | -0.04 | GRB7     | -0.06 |
| ATP5F1    | -0.21 | GJB2      | -0.04 | OLFML3   | -0.06 |
| FGF10     | -0.21 | NPY1R     | -0.04 | ENPP6    | -0.06 |
| RNMT      | -0.21 | OTOF      | -0.04 | ZBTB7C   | -0.06 |
| ZYX       | -0.21 | SLC2A13   | -0.04 | IGSF9    | -0.06 |
| HAPLN2    | -0.21 | HEY1      | -0.04 | PRSS23   | -0.06 |
| REEP5     | -0.22 | QDPR      | -0.04 | BOK      | -0.06 |
| ARSG      | -0.22 | MYOC      | -0.05 | GFM1     | -0.06 |
| AGPAT4    | -0.22 | MTMR2     | -0.05 | ACCN2    | -0.06 |
| PLXNB3    | -0.22 | FAM13C    | -0.05 | SCHIP1   | -0.06 |
| PLEKHG3   | -0.22 | FOS       | -0.05 | NAPEPLD  | -0.06 |
| H2-T23    | -0.22 | DCLK1     | -0.05 | CUX2     | -0.06 |
| TTYH2     | -0.22 | NDRL      | -0.05 | GJB2     | -0.06 |
| ADORA1    | -0.22 | OLIG1     | -0.05 | LYZ      | -0.06 |
| SOX5      | -0.22 | CHRNA5    | -0.05 | RAB3B    | -0.06 |
| PHLDB1    | -0.22 | SAP130    | -0.05 | GJB6     | -0.06 |
| PBRM1     | -0.22 | TNNC1     | -0.05 | CPNE4    | -0.06 |
| EFHD1     | -0.22 | TIAM1     | -0.05 | NOL4     | -0.06 |
| PRICKLE1  | -0.22 | SLAIN1    | -0.05 | VAT1L    | -0.06 |
| CPLX2     | -0.22 | RYR1      | -0.05 | SAP130   | -0.06 |
| DOK4      | -0.22 | 2810405KC | -0.05 | PRICKLE1 | -0.06 |
| 3110035E1 | -0.23 | LY6G6E    | -0.05 | EPB4.9   | -0.06 |
| NEU2      | -0.23 | WASF1     | -0.05 | CBLN4    | -0.06 |
| NETO1     | -0.23 | SLC39A10  | -0.05 | KIF5A    | -0.06 |
| VSTM2B    | -0.23 | TMEM38A   | -0.05 | SLC6A13  | -0.06 |
| NIPA1     | -0.23 | ZIC1      | -0.05 | PACS2    | -0.06 |
| NXPH2     | -0.23 | SULF1     | -0.05 | ECHDC2   | -0.06 |
| ENSMUSG1  | -0.23 | ADRA2A    | -0.05 | SCD1     | -0.06 |
| NMRAL1    | -0.23 | PIK3R3    | -0.06 | EXDL2    | -0.07 |
| C130090K2 | -0.23 | COL6A1    | -0.06 | SLC24A3  | -0.07 |
| RAPGEF4   | -0.23 | ETS1      | -0.06 | WNT4     | -0.07 |
| INA       | -0.23 | TTC19     | -0.06 | NPY1R    | -0.07 |
| TRIM59    | -0.23 | ZFPM2     | -0.06 | RYR1     | -0.07 |
| KLF7      | -0.23 | CDH7      | -0.06 | ITPKA    | -0.07 |
| PACS2     | -0.23 | RAB3B     | -0.06 | MIF4GD   | -0.07 |
| LRRN1     | -0.23 | RASGRF2   | -0.06 | FAM13C   | -0.07 |
| SKP1A     | -0.23 | PRSS23    | -0.06 | PTPRK    | -0.07 |
| TPBG      | -0.23 | TRIM36    | -0.06 | RAPGEF4  | -0.07 |
| SCD1      | -0.24 | ANXA2     | -0.06 | TRIB2    | -0.07 |
| GPR21     | -0.24 | TMEM19    | -0.06 | CAMK1G   | -0.07 |
| RASL11B   | -0.24 | RAI14     | -0.06 | IFITM3   | -0.07 |

|          |       |           |       |           |       |
|----------|-------|-----------|-------|-----------|-------|
| PADI6    | -0.24 | SLC2A1    | -0.06 | ANXA2     | -0.07 |
| ANO4     | -0.24 | TCF4      | -0.06 | NRIP3     | -0.07 |
| FOXN3    | -0.24 | 6330503K2 | -0.06 | LOC10004  | -0.07 |
| LY6G6E   | -0.24 | NFIB      | -0.06 | RGS9      | -0.07 |
| SLAIN1   | -0.24 | NRIP3     | -0.06 | BHLHB5    | -0.07 |
| PPP1R14A | -0.24 | ELAVL2    | -0.06 | ZFP810    | -0.07 |
| PDLIM2   | -0.24 | STAC2     | -0.06 | TAC1      | -0.07 |
| KIF5A    | -0.25 | TPBG      | -0.06 | FOSB      | -0.07 |
| RELL1    | -0.25 | GADD45A   | -0.06 | 3110035E1 | -0.07 |
| DDAH1    | -0.25 | RTN4RL1   | -0.06 | NPTX2     | -0.08 |
| FAM134B  | -0.25 | MKX       | -0.06 | NAV1      | -0.08 |
| HTR1F    | -0.26 | FAM134B   | -0.06 | S100A11   | -0.08 |
| NTSR1    | -0.26 | GCNT2     | -0.06 | PRR13     | -0.08 |
| UAP1     | -0.26 | GM129     | -0.06 | PDYN      | -0.08 |
| VANGL2   | -0.26 | CADPS2    | -0.06 | RILPL1    | -0.08 |
| OGFRL1   | -0.26 | HKDC1     | -0.07 | EXTL3     | -0.08 |
| PCBP2    | -0.26 | OSBPL9    | -0.07 | RHBDL3    | -0.08 |
| ADAMTS4  | -0.26 | PHLDB1    | -0.07 | AI593442  | -0.08 |
| OSBPL9   | -0.26 | UGT8A     | -0.07 | DACT2     | -0.08 |
| LRFN2    | -0.26 | ISLR2     | -0.07 | D930015E0 | -0.08 |
| CRTAC1   | -0.26 | VASN      | -0.07 | KLF2      | -0.08 |
| CARHSP1  | -0.26 | CBLN4     | -0.07 | SLC2A1    | -0.08 |
| GADD45A  | -0.27 | ASAH2     | -0.07 | SERINC2   | -0.08 |
| GLTP     | -0.27 | NEU2      | -0.07 | MARCKSL1  | -0.08 |
| BCL11B   | -0.27 | PPM2C     | -0.07 | CLCN2     | -0.08 |
| LOC10004 | -0.27 | CAMKK1    | -0.07 | ZDHHC14   | -0.08 |
| D12ERTD6 | -0.27 | OLFML2B   | -0.07 | GTPBP6    | -0.08 |
| PIK3R3   | -0.27 | 3110035E1 | -0.07 | MORN4     | -0.08 |
| LOC10004 | -0.28 | TGM2      | -0.07 | STARD8    | -0.08 |
| RIMS1    | -0.28 | THBD      | -0.07 | SLC2A13   | -0.08 |
| DRD1A    | -0.28 | ST8SIA2   | -0.08 | FHL1      | -0.08 |
| RHOG     | -0.28 | AGAP1     | -0.08 | CAMK2A    | -0.08 |
| KCNK13   | -0.29 | FKBP1A    | -0.08 | PHLDB1    | -0.09 |
| NOS1AP   | -0.29 | RGS4      | -0.08 | RGL1      | -0.09 |
| NFIB     | -0.29 | DCN       | -0.08 | WNT2      | -0.09 |
| PLEKHA2  | -0.30 | ABCA8A    | -0.08 | CACNB3    | -0.09 |
| ITGB4    | -0.30 | LOC100040 | -0.08 | SULT1A1   | -0.09 |
| GAB1     | -0.30 | RXFP3     | -0.08 | HKDC1     | -0.09 |
| NRIP3    | -0.30 | ACTA2     | -0.08 | UAP1      | -0.09 |
| IL33     | -0.31 | LOC100040 | -0.08 | TNNC1     | -0.09 |
| UNC5B    | -0.31 | CPNE8     | -0.08 | RPH3A     | -0.10 |
| PDLIM1   | -0.31 | ODZ4      | -0.08 | RTN4RL1   | -0.10 |
| PEBP1    | -0.31 | ELOVL6    | -0.09 | BHLHB2    | -0.10 |

|           |       |           |       |           |       |
|-----------|-------|-----------|-------|-----------|-------|
| ADSSL1    | -0.31 | NAPEPLD   | -0.09 | EMID2     | -0.10 |
| LPGAT1    | -0.31 | TRF       | -0.09 | THBD      | -0.10 |
| FANCD2    | -0.31 | LRRTM2    | -0.09 | FBXL10    | -0.10 |
| NRP1      | -0.32 | SPAG5     | -0.09 | 1300013J1 | -0.10 |
| COL6A1    | -0.32 | NFE2L3    | -0.09 | CRTAC1    | -0.10 |
| RGS9      | -0.32 | RELN      | -0.09 | HAP1      | -0.10 |
| LOC100041 | -0.32 | HSD17B11  | -0.09 | HSPA2     | -0.10 |
| GAL3ST1   | -0.33 | PRICKLE1  | -0.09 | RAMP3     | -0.10 |
| SST       | -0.33 | SKP1A     | -0.09 | PRELP     | -0.10 |
| MYL4      | -0.33 | LPGAT1    | -0.10 | ACSL5     | -0.10 |
| LOC100041 | -0.33 | LOC100041 | -0.10 | SYTL2     | -0.10 |
| LASS2     | -0.33 | RYR3      | -0.10 | UBQLN4    | -0.10 |
| GARNL3    | -0.34 | C130090K2 | -0.10 | CDKN1C    | -0.10 |
| KCNA1     | -0.34 | PDYN      | -0.10 | OGN       | -0.10 |
| TMEM178   | -0.34 | LPL       | -0.10 | PCBP2     | -0.10 |
| SLC44A1   | -0.34 | GLRA2     | -0.10 | EHMT2     | -0.11 |
| CNTNAP4   | -0.34 | SC4MOL    | -0.10 | TMEM38A   | -0.11 |
| OPALIN    | -0.34 | CD83      | -0.10 | COL5A1    | -0.11 |
| ZDHHC9    | -0.34 | TLE4      | -0.11 | RXFP3     | -0.11 |
| ARHGAP25  | -0.35 | MMD       | -0.11 | DCLK1     | -0.11 |
| LOC100041 | -0.36 | MID1      | -0.11 | PROSAP1P  | -0.11 |
| SC4MOL    | -0.36 | EGR2      | -0.11 | CLCN4-2   | -0.11 |
| CNP       | -0.37 | CAR4      | -0.11 | SPOP      | -0.11 |
| NDRL      | -0.37 | PER2      | -0.11 | BMP1      | -0.12 |
| PPP1R1B   | -0.37 | MAPRE2    | -0.11 | ADCYAP1   | -0.12 |
| PLP1      | -0.37 | VSTM2B    | -0.11 | 2510009EC | -0.12 |
| RAI14     | -0.38 | CACNG3    | -0.11 | CD83      | -0.12 |
| TLE4      | -0.38 | SLC7A4    | -0.11 | CAR4      | -0.12 |
| EVI2A     | -0.39 | IL11RA1   | -0.12 | WFS1      | -0.12 |
| LITAF     | -0.39 | RELL1     | -0.12 | CACNA1H   | -0.12 |
| OTX1      | -0.39 | LRRN1     | -0.12 | ANXA11    | -0.12 |
| ISLR2     | -0.40 | LOC100041 | -0.12 | NR2F6     | -0.12 |
| IGSF21    | -0.41 | TSPAN2    | -0.12 | SLC4A3    | -0.12 |
| NEFM      | -0.42 | CNTNAP4   | -0.12 | DCN       | -0.13 |
| EDG2      | -0.43 | PDZRN3    | -0.13 | TMCC2     | -0.13 |
| ENPP6     | -0.43 | EG434858  | -0.13 | ARNTL     | -0.14 |
| NDRG1     | -0.46 | MYO5B     | -0.13 | NBL1      | -0.14 |
| GLRA2     | -0.46 | EPHA7     | -0.13 | PDZRN3    | -0.14 |
| CRYAB     | -0.46 | ADAMTSL4  | -0.13 | MAPRE2    | -0.14 |
| ANLN      | -0.46 | PBRM1     | -0.13 | 2310021P1 | -0.15 |
| SPSB1     | -0.46 | WDR60     | -0.13 | ISLR2     | -0.15 |
| TSPAN2    | -0.46 | TRIM59    | -0.13 | MGP       | -0.15 |
| GJC2      | -0.48 | 633040611 | -0.14 | FSTL4     | -0.15 |

|         |       |           |       |           |       |
|---------|-------|-----------|-------|-----------|-------|
| PLEKHB1 | -0.48 | FLT1      | -0.14 | AKAP8L    | -0.15 |
| SLA     | -0.48 | PIGP      | -0.14 | RIMS3     | -0.15 |
| QDPR    | -0.49 | COCH      | -0.14 | 6030405A1 | -0.16 |
| ZFPM2   | -0.50 | GLTP      | -0.14 | LOC100047 | -0.16 |
| SCN4B   | -0.51 | CAR14     | -0.14 | RASGRF1   | -0.16 |
| MOBP    | -0.52 | NIPA1     | -0.14 | SLC13A4   | -0.17 |
| UGT8A   | -0.53 | CHN2      | -0.15 | RYR3      | -0.17 |
| PRSS35  | -0.53 | PER1      | -0.15 | CPNE9     | -0.18 |
| ADRA2A  | -0.53 | NEFM      | -0.15 | REEP5     | -0.19 |
| MAG     | -0.56 | NOL4      | -0.15 | HPCA      | -0.19 |
| MOG     | -0.57 | ARNTL     | -0.15 | FLT1      | -0.20 |
| SULF1   | -0.57 | BHLHB5    | -0.15 | IGF2      | -0.21 |
| MBP     | -0.58 | BHLHB2    | -0.15 | PLCH2     | -0.21 |
| SEMA5A  | -0.59 | RNF144A   | -0.16 | LOC100041 | -0.21 |
| MAL     | -0.59 | OGFRL1    | -0.18 | COL6A1    | -0.22 |
| CLDN11  | -0.60 | LOC100041 | -0.19 | CACNG3    | -0.22 |
| FA2H    | -0.62 | RAB5A     | -0.19 | VGFB      | -0.24 |
| BCAS1   | -0.68 | ATP5F1    | -0.20 | 4933439C2 | -0.24 |
| PRR18   | -0.69 | PRSS35    | -0.20 | B930076A0 | -0.26 |
| TRF     | -0.73 | PKNOX2    | -0.21 | FAM148C   | -0.26 |
| RPRM    | -0.83 | VAT1L     | -0.22 | C1QTNF4   | -0.26 |
| CTGF    | -0.90 | NDRG1     | -0.24 | PKNOX2    | -0.30 |
