# Supplementary material for: Molecular laterality encodes stress susceptibility in the medial prefrontal cortex
Source: PubMed Central journal article supplement (PMC8201740; doi:10.1186/s13041-021-00802-w), 2021-06-14
Supplement: 13041_2021_802_MOESM7_ESM.pdf [file 13041_2021_802_MOESM7_ESM.pdf]

**Supplementary Table 5**

Differences in the expression of the housekeeping genes, *Actb* ( $\beta$ -actin), *Gapdh* (glyceraldehyde-3-phosphate dehydrogenase), *B2m* ( $\beta_2$  microglobulin between control and resilient/susceptible mice, summarized as  $\log_2$  FC values and *p*-values for each gene.

| Control group | Test group        | Gene         | log2 fold- t |        | p-value | Adjusted p-value |
|---------------|-------------------|--------------|--------------|--------|---------|------------------|
| Control Left  | Resilient Left    | <i>Actb</i>  | 0.101        | 2.148  | 0.048   | <b>0.263</b>     |
| Control Left  | Resilient Left    | <i>Gapdh</i> | -0.030       | -0.542 | 0.596   | <b>0.821</b>     |
| Control Left  | Resilient Left    | <i>B2m</i>   | 0.121        | 2.748  | 0.015   | <b>0.144</b>     |
| Control Left  | Susceptible Left  | <i>Actb</i>  | 0.118        | 2.755  | 0.015   | <b>0.130</b>     |
| Control Left  | Susceptible Left  | <i>Gapdh</i> | 0.076        | 1.486  | 0.158   | <b>0.446</b>     |
| Control Left  | Susceptible Left  | <i>B2m</i>   | 0.012        | 0.291  | 0.775   | <b>0.914</b>     |
| Control Right | Resilient Right   | <i>Actb</i>  | 0.045        | 0.959  | 0.353   | <b>0.791</b>     |
| Control Right | Resilient Right   | <i>Gapdh</i> | -0.106       | -1.874 | 0.080   | <b>0.488</b>     |
| Control Right | Resilient Right   | <i>B2m</i>   | -0.004       | -0.091 | 0.928   | <b>0.986</b>     |
| Control Right | Susceptible Right | <i>Actb</i>  | 0.146        | 3.404  | 0.004   | <b>0.069</b>     |
| Control Right | Susceptible Right | <i>Gapdh</i> | -0.064       | -1.252 | 0.230   | <b>0.580</b>     |
| Control Right | Susceptible Right | <i>B2m</i>   | -0.116       | -3.870 | 0.001   | <b>0.037</b>     |

**Normalized Avg. Expression**

|              | Control Left | Control Right | Resilient Left | Resilient Right | Susceptible Left | Susceptible Right |
|--------------|--------------|---------------|----------------|-----------------|------------------|-------------------|
| <i>Gapdh</i> | 9076.67811   | 9743.384      | 8987.215       | 9055.841        | 9682.672         | 9326.445          |
| <i>Actb</i>  | 4288.406856  | 4225.192      | 4483.022       | 4356.701        | 4536.954         | 4672.977          |
| <i>B2m</i>   | 2140.939598  | 2141.417      | 2287.402       | 2135.578        | 2120.134         | 1922.615          |
