# Supplementary material for: Molecular laterality encodes stress susceptibility in the medial prefrontal cortex
Source: PubMed Central journal article supplement (PMC8201740; doi:10.1186/s13041-021-00802-w), 2021-06-14
Supplement: 13041_2021_802_MOESM8_ESM.pdf [file 13041_2021_802_MOESM8_ESM.pdf]

**Supplementary table 6**

GO analysis using GeneMANIA. Genes with leftward or rightward laterality were used as input to GeneMANIA, and the associated GO terms were reported.

**GO analysis of Laterality genes**

**Method: GeneMANIA via Cytoscape (Differentially\_expressed\_genes\_cutoff(adj.P.Val < 0.05))**

| GO_term_ID              | GO annotation              | Q-value    | Gene Total | Genes_in_the_input                   | Genes_not_in_the_input          |
|-------------------------|----------------------------|------------|------------|--------------------------------------|---------------------------------|
| <b>Laterality_to_SL</b> |                            |            |            |                                      |                                 |
| GO:0050804              | regulation of synaptic tra | 4.30E-04   | 17         | 235 Adcyap1,Bdnf,Camk2a,Egr2,Itpka,  | Asic1,Camk2b,Egr1,Neurl1a,Stx1a |
| GO:0004683              | calmodulin-dependent pr    | 0.00192627 | 6          | 20 Camk1g,Camk2a,Camkk1,Itpka,Pn     | Camk2b                          |
| GO:0048168              | regulation of neuronal sy  | 0.00218368 | 8          | 50 Bdnf,Camk2a,Egr2,Rasgrf1,Vgf      | Camk2b,Egr1,Neurl1a             |
| GO:0031012              | extracellular matrix       | 0.00245384 | 17         | 292 Cdh8,Coch,Dcn,Efemp2,Fkbp1a,Lp   | Col26a1,Ctgf                    |
| GO:0071248              | cellular response to meta  | 0.00632879 | 8          | 61 Fos,Fosb,Junb,Mef2c,Mt3           | Dmtn,Jun,Nptx1                  |
| GO:0071277              | cellular response to calci | 0.00711211 | 6          | 29 Fos,Fosb,Junb,Mef2c               | Dmtn,Jun                        |
| GO:0071241              | cellular response to inorg | 0.0093424  | 8          | 67 Fos,Fosb,Junb,Mef2c,Mt3           | Dmtn,Jun,Nptx1                  |
| GO:0048167              | regulation of synaptic pla | 0.01233113 | 10         | 119 Bdnf,Camk2a,Egr2,Itpka,Rasgrf1,R | Camk2b,Egr1,Neurl1a             |
| GO:0048306              | calcium-dependent protei   | 0.01352877 | 7          | 52 Anxa11,Mgp,S100a11,S100a6,Tnn     | Stx1a                           |
| GO:0048511              | rhythmic process           | 0.01570336 | 12         | 184 Adcyap1,Arntl,Casp1,Dbp,Egr2,Nr  | Bhlhe40                         |
| GO:0007611              | learning or memory         | 0.01718652 | 12         | 189 Bdnf,Casp1,Igf2,Mef2c,Pde4d,Relr | Asic1,Egr1,Jun,Pde1b            |
| GO:0044548              | S100 protein binding       | 0.01718652 | 4          | 11 Anxa11,Anxa2,S100a11,S100a6       |                                 |
| GO:0010038              | response to metal ion      | 0.0210811  | 11         | 163 Anxa11,Fos,Fosb,Junb,Mef2c,Mt3,  | Camk2b,Dmtn,Jun,Nptx1           |
| GO:0003012              | muscle system process      | 0.02428711 | 13         | 233 Acta2,Camta2,Fkbp1a,Flt1,Gucy1a  | Ctgf                            |
| GO:0050890              | cognition                  | 0.02428711 | 12         | 200 Bdnf,Casp1,Igf2,Mef2c,Pde4d,Relr | Asic1,Egr1,Jun,Pde1b            |
| GO:0000977              | RNA polymerase II regula   | 0.02810838 | 9          | 114 Dbp,Egr4,Junb,Mef2c,Per1,Tcf4    | Egr1,Jun,Tbr1                   |
| GO:0014074              | response to purine-contai  | 0.02810838 | 8          | 88 Casp1,Egr2,Egr4,Fkbp1a,Pde4d,Ry   | Dmtn,Egr1                       |
| GO:0007623              | circadian rhythm           | 0.02810838 | 8          | 87 Arntl,Casp1,Dbp,Nr2f6,Per1,Per2,F | Bhlhe40                         |
| GO:0000982              | RNA polymerase II core p   | 0.03180586 | 9          | 117 Arntl,Dbp,Hey1,Mef2c,Tcf4        | Bhlhe40,Egr1,Jun,Nr4a1          |

|            |                             |            |    |     |                                    |                             |
|------------|-----------------------------|------------|----|-----|------------------------------------|-----------------------------|
| GO:0001012 | RNA polymerase II regula    | 0.04010161 | 9  | 122 | Dbp,Egr4,Junb,Mef2c,Per1,Tcf4      | Egr1,Jun,Tbr1               |
| GO:0010035 | response to inorganic suk   | 0.04010161 | 13 | 252 | Anxa11,Fos,Fosb,Junb,Mef2c,Mt3,    | Camk2b,Dmtn,Jun,Nptx1,Nr4a1 |
| GO:0008021 | synaptic vesicle            | 0.0427941  | 8  | 98  | Bdnf,Mt3,Npy1r,Otof,Sept5,Sphk1    | Cdk16,Stx1a                 |
| GO:0000976 | transcription regulatory re | 0.0427941  | 10 | 154 | Dbp,Egr4,Junb,Mef2c,Per1,Tcf4,Zfj  | Egr1,Jun,Tbr1               |
| GO:0006936 | muscle contraction          | 0.0427941  | 11 | 188 | Acta2,Fkbp1a,Flt1,Gucy1a3,Npy1r,   | Ctgf                        |
| GO:0005184 | neuropeptide hormone ac     | 0.0427941  | 4  | 16  | Adcyap1,Cck,Pdyn,Vgf               |                             |
| GO:0030136 | clathrin-coated vesicle     | 0.0427941  | 10 | 157 | Bdnf,Lyz2,Mt3,Npy1r,Otof,Sept5,S   | Cdk16,Lyz1,Stx1a            |
| GO:0016358 | dendrite development        | 0.04554216 | 10 | 159 | Bdnf,Btdb3,Cobl,Igsf9,Itpka,Reln,S | Camk2b,Neur1a,Ngef          |
| GO:0051592 | response to calcium ion     | 0.04554216 | 7  | 74  | Anxa11,Fos,Fosb,Junb,Mef2c         | Dmtn,Jun                    |
| GO:0060998 | regulation of dendritic sp  | 0.05336543 | 5  | 33  | Itpka,Reln                         | Camk2b,Neur1a,Ngef          |
| GO:0032922 | circadian regulation of ge  | 0.0591729  | 4  | 18  | Arntl,Per1,Prkg2                   | Bhlhe40                     |
| GO:0060999 | positive regulation of den  | 0.07177436 | 4  | 19  | Itpka,Reln                         | Camk2b,Neur1a               |
| GO:0071320 | cellular response to cAMF   | 0.07434673 | 5  | 36  | Egr2,Egr4,Pde4d                    | Dmtn,Egr1                   |
| GO:0006937 | regulation of muscle cont   | 0.08261317 | 8  | 112 | Flt1,Gucy1a3,Pde4d,Ryr1,Scn3b,Sr   | Ctgf                        |
| GO:0010975 | regulation of neuron proj   | 0.08261317 | 13 | 286 | Adcyap1,Cobl,Hap1,Itpka,Mt3,Reln   | Camk2b,Neur1a,Ngef,Tbr1     |
| GO:0061001 | regulation of dendritic sp  | 0.08261317 | 4  | 20  | Itpka,Reln                         | Camk2b,Ngef                 |
| GO:0001077 | RNA polymerase II core p    | 0.08575635 | 7  | 85  | Arntl,Dbp,Mef2c,Tcf4               | Egr1,Jun,Nr4a1              |
| GO:0035914 | skeletal muscle cell differ | 0.09424042 | 6  | 61  | Bcl9l,Egr2,Fos,Mef2c               | Egr1,Nr4a1                  |
| GO:0090257 | regulation of muscle syste  | 0.09849911 | 9  | 148 | Flt1,Gucy1a3,Mef2c,Pde4d,Ryr1,Sc   | Ctgf                        |

### Laterality\_to\_SR

|            |                           |          |    |     |                                  |                                   |
|------------|---------------------------|----------|----|-----|----------------------------------|-----------------------------------|
| GO:0007272 | ensheathment of neurons   | 2.55E-07 | 13 | 90  | Cldn11,Fa2h,Gal3st1,Mal,Mbp,Mtr  | Myrf,Ndr1,Nkx6-2,Olig2            |
| GO:0008366 | axon ensheathment         | 2.55E-07 | 13 | 90  | Cldn11,Fa2h,Gal3st1,Mal,Mbp,Mtr  | Myrf,Ndr1,Nkx6-2,Olig2            |
| GO:0042552 | myelination               | 2.02E-06 | 12 | 88  | Fa2h,Gal3st1,Mal,Mbp,Mtmr2,Plp   | Myrf,Ndr1,Nkx6-2,Olig2            |
| GO:0033267 | axon part                 | 5.24E-05 | 14 | 173 | Adora1,Chrm2,Drd1a,Grik1,Ina,Kci | Aatk,Ermn,Nefh                    |
| GO:0019228 | neuronal action potential | 7.05E-05 | 10 | 78  | Cldn11,Drd1a,Gal3st1,Mal,Mbp,Pl  | Myrf,Nkx6-2,Olig2                 |
| GO:0001508 | action potential          | 7.87E-05 | 12 | 128 | Cldn11,Drd1a,Gal3st1,Mal,Mbp,Pl  | Myrf,Nkx6-2,Olig2                 |
| GO:0043209 | myelin sheath             | 1.21E-04 | 8  | 46  | Cnp,Gjc2,Mag,Mbp,Plp1,Plp1,Tspa  | Ermn                              |
| GO:0042063 | gliogenesis               | 2.85E-04 | 13 | 179 | Drd1a,Fa2h,Fgf10,Nfib,Plp1,Sox5, | Gfap,Myrf,Ndr1,Nkx6-2,Olig2,Sox10 |

|            |                                                            |            |    |     |                                        |                                   |
|------------|------------------------------------------------------------|------------|----|-----|----------------------------------------|-----------------------------------|
| GO:0010001 | glial cell differentiation                                 | 2.85E-04   | 12 | 148 | Drd1a,Fa2h,Fgf10,Nfib,Plp1,Sox5        | Gfap,Myrf,Ndr1,Nkx6-2,Olig2,Sox10 |
| GO:0060053 | neurofilament cytoskeleton                                 | 0.01019012 | 4  | 11  | Ina,Nefm,Nrp1                          | Nefh                              |
| GO:0048709 | oligodendrocyte differentiation                            | 0.01142335 | 7  | 62  | Fa2h,Plp1,Sox5                         | Myrf,Nkx6-2,Olig2,Sox10           |
| GO:0021782 | glial cell development                                     | 0.01493911 | 7  | 66  | Drd1a,Fa2h,Plp1                        | Gfap,Myrf,Ndr1,Nkx6-2             |
| GO:0031345 | negative regulation of cell cycle                          | 0.01493911 | 8  | 92  | Inpp1,Nrp1,Plxn3,Sema3f,Sema5a         | Aatk,Gfap,Lpar1                   |
| GO:0032291 | axon ensheathment in central nervous system                | 0.01935836 | 4  | 14  | Fa2h,Plp1                              | Myrf,Nkx6-2                       |
| GO:0022010 | central nervous system myelination                         | 0.01935836 | 4  | 14  | Fa2h,Plp1                              | Myrf,Nkx6-2                       |
| GO:0050804 | regulation of synaptic transmission                        | 0.01935836 | 12 | 235 | Adora1,Cplx2,Drd1a,Grik1,Neto1,Slit1   | Gfap,S100b                        |
| GO:0010975 | regulation of neuron projection morphogenesis              | 0.02758903 | 13 | 286 | Inpp1,Islr2,Nefm,Nrp1,Rapgef4,Scn1b    | Aatk,Gfap,Klk6,Lpar1,Rnd2,Tenm3   |
| GO:0048169 | regulation of long-term potentiation                       | 0.03157084 | 5  | 32  | Drd1a,Grik1,Neto1,Rims1                | S100b                             |
| GO:0060560 | developmental growth in central nervous system             | 0.03873472 | 9  | 143 | Dclk1,Fgf10,Islr2,Nrp1,Sema3f,Serpinf1 | Aatk,Rnd2                         |
| GO:0001505 | regulation of neurotransmitter release                     | 0.05743738 | 8  | 118 | Cadps2,Cplx2,Pebp1,Rab3b,Rims1         | Cplx1,Gfap,Vamp1                  |
| GO:0048167 | regulation of synaptic plasticity                          | 0.05743738 | 8  | 119 | Adora1,Cplx2,Drd1a,Grik1,Neto1,Slit1   | Gfap,S100b                        |
| GO:0050769 | positive regulation of neuron projection morphogenesis     | 0.05743738 | 9  | 153 | Islr2,Nrp1,Sema5a,Trf                  | Gfap,Nkx6-2,Olig2,Rnd2,Sox10      |
| GO:0061387 | regulation of extent of central nervous system myelination | 0.06262494 | 6  | 62  | Islr2,Nrp1,Sema3f,Sema5a               | Aatk,Rnd2                         |
| GO:0071526 | semaphorin-plexin signaling                                | 0.07051721 | 4  | 21  | Nrp1,Plxn3,Sema3f,Sema5a               |                                   |
| GO:0030517 | negative regulation of axon growth                         | 0.08201655 | 4  | 22  | Nrp1,Sema3f,Sema5a                     | Aatk                              |
| GO:0048521 | negative regulation of behavioral locomotion               | 0.08429841 | 5  | 42  | Adora1,Drd1a,Nrp1,Sema3f,Sema5a        |                                   |
| GO:0014015 | positive regulation of gliogenesis                         | 0.09102638 | 5  | 43  | Trf                                    | Gfap,Nkx6-2,Olig2,Sox10           |

## Laterality\_to\_SR

|             | log2       |            |            |            |            |            |            |            |            |            |
|-------------|------------|------------|------------|------------|------------|------------|------------|------------|------------|------------|
| ensheathmei | sl/cl      | sr/cr      | rl/cl      | rr/cr      | cl         | cr         | rl         | rr         | sl         | sr         |
| Cldn11      | -0.4968415 | 0.24831513 | 0.21596379 | 0.29303865 | 12.879171  | 12.7300697 | 13.0928128 | 13.0230296 | 12.3798835 | 12.9790939 |
| Fa2h        | -0.4324396 | 0.35020092 | 0.24544011 | 0.34836525 | 10.1265214 | 9.96429911 | 10.3727468 | 10.3126718 | 9.69560386 | 10.3139678 |
| Gal3st1     | -0.1441335 | 0.19409389 | 0.07424831 | 0.06347833 | 8.22833122 | 8.21767388 | 8.30091658 | 8.27926268 | 8.08255917 | 8.41034047 |
| Mal         | -0.640986  | 0.12114878 | 0.08103634 | 0.11376356 | 10.3322939 | 10.1622049 | 10.4143046 | 10.2791568 | 9.69166826 | 10.2837299 |
| Mbp         | -0.4973675 | 0.2120399  | 0.11258043 | 0.15414523 | 12.5755392 | 12.4452558 | 12.6871393 | 12.5994269 | 12.0773827 | 12.6574414 |
| Mtmr2       | -0.1318853 | -0.0078268 | -0.0945223 | -0.0751252 | 7.98232154 | 8.0076583  | 7.88776747 | 7.93324288 | 7.85043985 | 8.00038793 |
| Plp1        | -0.4856655 | -0.005598  | -0.0984382 | 0.02850332 | 13.5304486 | 13.4231716 | 13.427864  | 13.4550626 | 13.0447593 | 13.4176123 |
| Trf         | -0.4485447 | 0.32620563 | 0.28403745 | 0.41163899 | 10.340288  | 10.2956684 | 10.6207763 | 10.7061126 | 9.88974048 | 10.6202687 |
| Ugt8a       | -0.5260096 | 0.11986226 | -0.0144965 | 0.16680927 | 9.41500408 | 9.29987405 | 9.40047989 | 9.46654771 | 8.8898202  | 9.41937231 |
| myelination | sl/cl      | sr/cr      | rl/cl      | rr/cr      | cl         | cr         | rl         | rr         | sl         | sr         |
| Fa2h        | -0.4324396 | 0.35020092 | 0.24544011 | 0.34836525 | 10.1265214 | 9.96429911 | 10.3727468 | 10.3126718 | 9.69560386 | 10.3139678 |
| Gal3st1     | -0.1441335 | 0.19409389 | 0.07424831 | 0.06347833 | 8.22833122 | 8.21767388 | 8.30091658 | 8.27926268 | 8.08255917 | 8.41034047 |
| Mal         | -0.640986  | 0.12114878 | 0.08103634 | 0.11376356 | 10.3322939 | 10.1622049 | 10.4143046 | 10.2791568 | 9.69166826 | 10.2837299 |
| Mbp         | -0.4973675 | 0.2120399  | 0.11258043 | 0.15414523 | 12.5755392 | 12.4452558 | 12.6871393 | 12.5994269 | 12.0773827 | 12.6574414 |
| Mtmr2       | -0.1318853 | -0.0078268 | -0.0945223 | -0.0751252 | 7.98232154 | 8.0076583  | 7.88776747 | 7.93324288 | 7.85043985 | 8.00038793 |
| Plp1        | -0.4856655 | -0.005598  | -0.0984382 | 0.02850332 | 13.5304486 | 13.4231716 | 13.427864  | 13.4550626 | 13.0447593 | 13.4176123 |
| Trf         | -0.4485447 | 0.32620563 | 0.28403745 | 0.41163899 | 10.340288  | 10.2956684 | 10.6207763 | 10.7061126 | 9.88974048 | 10.6202687 |
| Ugt8a       | -0.5260096 | 0.11986226 | -0.0144965 | 0.16680927 | 9.41500408 | 9.29987405 | 9.40047989 | 9.46654771 | 8.8898202  | 9.41937231 |
| axon part   | sl/cl      | sr/cr      | rl/cl      | rr/cr      | cl         | cr         | rl         | rr         | sl         | sr         |
| Adora1      | -0.1338236 | 0.1003699  | 0.05985892 | 0.05416839 | 9.33627468 | 9.31955509 | 9.3952606  | 9.37412175 | 9.20128855 | 9.42024795 |
| Chrm2       | -0.0813274 | 0.17318973 | 0.01679958 | 0.05453759 | 7.54162009 | 7.43962265 | 7.55818603 | 7.49460942 | 7.46018545 | 7.6129532  |
| Drd1a       | -0.1765097 | 0.21604001 | 0.23741997 | 0.31572839 | 8.86725015 | 8.75885329 | 9.10488409 | 9.0704584  | 8.69063002 | 8.97086436 |
| Grik1       | -0.072822  | 0.23120946 | 0.02076328 | 0.10541359 | 8.83170475 | 8.7096613  | 8.85245319 | 8.81509304 | 8.76002423 | 8.9421728  |
| Ina         | -0.2731247 | -0.0694545 | -0.1171084 | -0.2991165 | 10.6803309 | 10.7085568 | 10.5643238 | 10.4078388 | 10.4077866 | 10.6389384 |

|       |            |            |            |            |            |            |            |            |            |            |
|-------|------------|------------|------------|------------|------------|------------|------------|------------|------------|------------|
| Kcna1 | -0.4424686 | 0.08849535 | -0.3137182 | -0.1077382 | 10.2156711 | 10.0233773 | 9.90217433 | 9.91586804 | 9.77487177 | 10.1121415 |
| Mag   | -0.5023372 | 0.13825412 | 0.23783388 | 0.19952505 | 11.129455  | 11.0432527 | 11.3675842 | 11.2440043 | 10.6292264 | 11.1859215 |
| Mbp   | -0.4973675 | 0.2120399  | 0.11258043 | 0.15414523 | 12.5755392 | 12.4452558 | 12.6871393 | 12.5994269 | 12.0773827 | 12.6574414 |
| Nefm  | -0.6966246 | -0.1205161 | -0.7623033 | -0.4588159 | 10.4736389 | 10.3194685 | 9.71999434 | 9.8680906  | 9.77961686 | 10.1984458 |
| Nrp1  | -0.1900102 | 0.21172684 | 0.05960549 | 0.11234177 | 9.85418363 | 9.76844352 | 9.91360028 | 9.88126168 | 9.66545395 | 9.98046094 |
| Pebp1 | -0.2176271 | 0.09540048 | -0.1432215 | -0.1051665 | 9.67634237 | 9.67640452 | 9.53433882 | 9.56918498 | 9.45985269 | 9.77031938 |

| action  | poten      | sl/cl      | sr/cr      | rl/cl      | rr/cr      | cl         | cr         | rl         | rr         | sl         | sr |
|---------|------------|------------|------------|------------|------------|------------|------------|------------|------------|------------|----|
| Cldn11  | -0.4968415 | 0.24831513 | 0.21596379 | 0.29303865 | 12.879171  | 12.7300697 | 13.0928128 | 13.0230296 | 12.3798835 | 12.9790939 |    |
| Drd1a   | -0.1765097 | 0.21604001 | 0.23741997 | 0.31572839 | 8.86725015 | 8.75885329 | 9.10488409 | 9.0704584  | 8.69063002 | 8.97086436 |    |
| Gal3st1 | -0.1441335 | 0.19409389 | 0.07424831 | 0.06347833 | 8.22833122 | 8.21767388 | 8.30091658 | 8.27926268 | 8.08255917 | 8.41034047 |    |
| Mal     | -0.640986  | 0.12114878 | 0.08103634 | 0.11376356 | 10.3322939 | 10.1622049 | 10.4143046 | 10.2791568 | 9.69166826 | 10.2837299 |    |
| Mbp     | -0.4973675 | 0.2120399  | 0.11258043 | 0.15414523 | 12.5755392 | 12.4452558 | 12.6871393 | 12.5994269 | 12.0773827 | 12.6574414 |    |
| Plp1    | -0.4856655 | -0.005598  | -0.0984382 | 0.02850332 | 13.5304486 | 13.4231716 | 13.427864  | 13.4550626 | 13.0447593 | 13.4176123 |    |
| Scn4b   | -0.4978921 | 0.06151567 | -0.1730431 | -0.3446934 | 9.84566841 | 9.80003476 | 9.67274781 | 9.45229825 | 9.34966899 | 9.85907937 |    |
| Tac1    | -0.0055481 | 0.0888648  | 0.13727475 | 0.03991981 | 8.96505961 | 9.03926907 | 9.10231572 | 9.07918394 | 8.95944831 | 9.12897664 |    |
| Ugt8a   | -0.5260096 | 0.11986226 | -0.0144965 | 0.16680927 | 9.41500408 | 9.29987405 | 9.40047989 | 9.46654771 | 8.8898202  | 9.41937231 |    |

| myelin sheat | sl/cl      | sr/cr      | rl/cl      | rr/cr      | cl         | cr         | rl         | rr         | sl         | sr         |
|--------------|------------|------------|------------|------------|------------|------------|------------|------------|------------|------------|
| Cnp          | -0.3646252 | 0.13276521 | 0.16825952 | 0.10568009 | 9.2598682  | 9.13205903 | 9.42970538 | 9.23671832 | 8.89672933 | 9.26428733 |
| Gjc2         | -0.5293398 | 0.09736653 | -0.0465779 | 0.07902822 | 8.58174596 | 8.42882303 | 8.53286329 | 8.5157479  | 8.0500122  | 8.52632836 |
| Mag          | -0.5023372 | 0.13825412 | 0.23783388 | 0.19952505 | 11.129455  | 11.0432527 | 11.3675842 | 11.2440043 | 10.6292264 | 11.1859215 |
| Mbp          | -0.4973675 | 0.2120399  | 0.11258043 | 0.15414523 | 12.5755392 | 12.4452558 | 12.6871393 | 12.5994269 | 12.0773827 | 12.6574414 |
| Plp          | -0.2119891 | 0.11572973 | 0.05951065 | -0.0180157 | 8.50748681 | 8.38544897 | 8.56730289 | 8.36825376 | 8.29587932 | 8.50392392 |
| Plp1         | -0.4856655 | -0.005598  | -0.0984382 | 0.02850332 | 13.5304486 | 13.4231716 | 13.427864  | 13.4550626 | 13.0447593 | 13.4176123 |
| Tspan2       | -0.4886947 | 0.1170349  | -0.0599009 | 0.20788379 | 9.71959636 | 9.57584744 | 9.66097785 | 9.78437388 | 9.23154056 | 9.69267373 |

| gliogenesis | sl/cl      | sr/cr      | rl/cl      | rr/cr      | cl         | cr         | rl         | rr        | sl         | sr         |
|-------------|------------|------------|------------|------------|------------|------------|------------|-----------|------------|------------|
| Drd1a       | -0.1765097 | 0.21604001 | 0.23741997 | 0.31572839 | 8.86725015 | 8.75885329 | 9.10488409 | 9.0704584 | 8.69063002 | 8.97086436 |

|       |            |            |            |            |            |            |            |            |            |            |
|-------|------------|------------|------------|------------|------------|------------|------------|------------|------------|------------|
| Fa2h  | -0.4324396 | 0.35020092 | 0.24544011 | 0.34836525 | 10.1265214 | 9.96429911 | 10.3727468 | 10.3126718 | 9.69560386 | 10.3139678 |
| Fgf10 | -0.0631123 | 0.17801331 | 0.13697511 | 0.15079431 | 8.05467223 | 8.02717273 | 8.19146421 | 8.17851742 | 7.99152521 | 8.20529331 |
| Nfib  | -0.2392624 | 0.12221731 | 0.09876637 | 0.2289528  | 10.8983554 | 10.8273665 | 10.9957295 | 11.0567948 | 10.6590926 | 10.9533488 |
| Plp1  | -0.4856655 | -0.005598  | -0.0984382 | 0.02850332 | 13.5304486 | 13.4231716 | 13.427864  | 13.4550626 | 13.0447593 | 13.4176123 |
| Sox5  | -0.1310938 | 0.22812017 | 0.0308673  | 0.12802004 | 8.74566103 | 8.60606734 | 8.77651582 | 8.73340211 | 8.61447431 | 8.83356156 |
| Trf   | -0.4485447 | 0.32620563 | 0.28403745 | 0.41163899 | 10.340288  | 10.2956684 | 10.6207763 | 10.7061126 | 9.88974048 | 10.6202687 |

| negative reg | sl/cl      | sr/cr      | rl/cl      | rr/cr      | cl         | cr         | rl         | rr         | sl         | sr         |
|--------------|------------|------------|------------|------------|------------|------------|------------|------------|------------|------------|
| Inpp1        | -0.1294311 | 0.03230877 | 0.03186388 | 0.00817119 | 8.92350402 | 8.90773747 | 8.95555856 | 8.91591735 | 8.79442635 | 8.94023305 |
| Nrp1         | -0.1900102 | 0.21172684 | 0.05960549 | 0.11234177 | 9.85418363 | 9.76844352 | 9.91360028 | 9.88126168 | 9.66545395 | 9.98046094 |
| Plxnb3       | -0.1652361 | 0.09823752 | 0.0882861  | 0.01284341 | 7.60214255 | 7.55765347 | 7.69017826 | 7.57054015 | 7.43724566 | 7.65538275 |
| Sema3f       | 0.02672611 | 0.17885969 | 0.13011803 | 0.12813663 | 7.774697   | 7.77641174 | 7.90585245 | 7.90378746 | 7.80180671 | 7.95476837 |
| Sema5a       | -0.1510265 | 0.57078098 | 0.25644608 | 0.38060153 | 9.65494491 | 9.5212659  | 9.91225324 | 9.90194337 | 9.50496153 | 10.0927684 |

## Laterality to SL

|              | log2       |            |            |            |            |            |            |            |            |            |
|--------------|------------|------------|------------|------------|------------|------------|------------|------------|------------|------------|
| regulation   | ofsl/cl    | sr/cr      | rl/cl      | rr/cr      | cl         | cr         | rl         | rr         | sl         | sr         |
| Adcyap1      | 0.09652559 | -0.2897159 | -0.068392  | -0.2877376 | 8.66575308 | 8.78223906 | 8.59374472 | 8.49353133 | 8.7610087  | 8.49227686 |
| Bdnf         | 0.12760208 | -0.1694664 | -0.0357513 | -0.0685744 | 8.66874524 | 8.67647392 | 8.63305174 | 8.60780939 | 8.79788667 | 8.50798419 |
| Camk2a       | 0.12882427 | -0.1567393 | -0.0339431 | -0.2757515 | 11.2437229 | 11.3286758 | 11.209452  | 11.0528715 | 11.3724021 | 11.1729444 |
| Egr2         | 0.1205971  | -0.2925413 | -0.2422923 | -0.0516785 | 8.42609713 | 8.34323047 | 8.18358463 | 8.29218916 | 8.54643106 | 8.05074068 |
| Itpka        | 0.26070549 | -0.0256763 | 0.00884585 | -0.1581371 | 11.1199921 | 11.1890521 | 11.1286664 | 11.0297254 | 11.3800044 | 11.1622499 |
| Mef2c        | -0.0300646 | -0.1470211 | -0.1313618 | 0.01062349 | 12.3353297 | 12.1664706 | 12.2038497 | 12.177467  | 12.3054209 | 12.0195774 |
| Rasgrf1      | 0.11672462 | -0.1812076 | -0.0345787 | -0.1620232 | 12.398056  | 12.5613233 | 12.3635828 | 12.3992456 | 12.5152882 | 12.3800608 |
| Reln         | 0.14123147 | -0.2556522 | -0.1338787 | -0.0846739 | 10.6569021 | 10.6959541 | 10.5223473 | 10.6130308 | 10.7981784 | 10.4407711 |
| Rims3        | 0.22824467 | -0.2805787 | 0.03815738 | -0.2989062 | 11.0699563 | 11.2236609 | 11.1078499 | 10.9242068 | 11.2986932 | 10.9486058 |
| Slc1a3       | -0.0506126 | -0.2791044 | -0.0636584 | -0.1854076 | 12.6956356 | 12.7280637 | 12.6313656 | 12.5419685 | 12.6447689 | 12.4481357 |
| Sphk1        | 0.03945189 | -0.1117222 | -0.015064  | -0.0971277 | 7.51933983 | 7.53441056 | 7.50431706 | 7.43740312 | 7.55908468 | 7.42314252 |
| Vgf          | 0.13758889 | -0.3677197 | 0.00520092 | -0.2064293 | 11.7571927 | 11.9973946 | 11.7639741 | 11.7908362 | 11.8946736 | 11.6295875 |
| calmodulin-c | sl/cl      | sr/cr      | rl/cl      | rr/cr      | cl         | cr         | rl         | rr         | sl         | sr         |
| Camk1g       | 0.10612734 | -0.1024396 | 0.05001433 | -0.0560137 | 7.65068212 | 7.72306371 | 7.70072602 | 7.66697336 | 7.75690015 | 7.62076028 |
| Camk2a       | 0.12882427 | -0.1567393 | -0.0339431 | -0.2757515 | 11.2437229 | 11.3286758 | 11.209452  | 11.0528715 | 11.3724021 | 11.1729444 |
| Camkk1       | 0.08680031 | -0.0902278 | 0.0113367  | 0.07996236 | 9.60781445 | 9.61052248 | 9.61966235 | 9.69061379 | 9.69509732 | 9.52292868 |
| Itpka        | 0.26070549 | -0.0256763 | 0.00884585 | -0.1581371 | 11.1199921 | 11.1890521 | 11.1286664 | 11.0297254 | 11.3800044 | 11.1622499 |
| Pnck         | 0.27751316 | -0.0042949 | 0.18244772 | 0.14282146 | 9.26929273 | 9.31840743 | 9.45072453 | 9.46204834 | 9.54661863 | 9.31408364 |
| regulation   | ofsl/cl    | sr/cr      | rl/cl      | rr/cr      | cl         | cr         | rl         | rr         | sl         | sr         |
| Bdnf         | 0.12760208 | -0.1694664 | -0.0357513 | -0.0685744 | 8.66874524 | 8.67647392 | 8.63305174 | 8.60780939 | 8.79788667 | 8.50798419 |
| Camk2a       | 0.12882427 | -0.1567393 | -0.0339431 | -0.2757515 | 11.2437229 | 11.3286758 | 11.209452  | 11.0528715 | 11.3724021 | 11.1729444 |
| Egr2         | 0.1205971  | -0.2925413 | -0.2422923 | -0.0516785 | 8.42609713 | 8.34323047 | 8.18358463 | 8.29218916 | 8.54643106 | 8.05074068 |
| Rasgrf1      | 0.11672462 | -0.1812076 | -0.0345787 | -0.1620232 | 12.398056  | 12.5613233 | 12.3635828 | 12.3992456 | 12.5152882 | 12.3800608 |
| Vgf          | 0.13758889 | -0.3677197 | 0.00520092 | -0.2064293 | 11.7571927 | 11.9973946 | 11.7639741 | 11.7908362 | 11.8946736 | 11.6295875 |

| extracellular | sl/cl      | sr/cr      | rl/cl      | rr/cr      | cl         | cr         | rl         | rr         | sl         | sr         |
|---------------|------------|------------|------------|------------|------------|------------|------------|------------|------------|------------|
| Cdh8          | 0.08893948 | -0.2012953 | -0.1547624 | -0.1534314 | 8.27062641 | 8.28853421 | 8.11600179 | 8.13509101 | 8.35970332 | 8.08726355 |
| Coch          | -0.0565005 | -0.2386535 | -0.3278033 | -0.0738228 | 7.92029158 | 7.80496381 | 7.59223842 | 7.7324557  | 7.86379483 | 7.56605329 |
| Dcn           | 0.26647432 | -0.327092  | 0.05421368 | 0.00448201 | 7.79608504 | 7.9219823  | 7.85031762 | 7.92638793 | 8.06354737 | 7.5948231  |
| Efemp2        | 0.09344833 | -0.0733703 | 0.05995699 | 0.04798374 | 7.66117521 | 7.6710178  | 7.72120993 | 7.71864232 | 7.75492436 | 7.59835253 |
| Fkbp1a        | 0.19804557 | -0.0118103 | -0.0036162 | 0.04749424 | 10.9504141 | 10.9743669 | 10.9454352 | 11.0211114 | 11.1473892 | 10.9623845 |
| Lpl           | 0.31549974 | -0.031869  | 0.08601434 | 0.1983453  | 9.05054192 | 9.03880789 | 9.13658353 | 9.23715674 | 9.36590902 | 9.0079158  |
| Mfge8         | 0.31055336 | -0.0100499 | 0.30838402 | 0.06177415 | 11.283777  | 11.3305338 | 11.5930208 | 11.3939321 | 11.5948333 | 11.3211435 |
| Mgp           | 0.40483863 | -0.0911722 | 0.26417314 | -0.0223393 | 8.23126739 | 8.37753607 | 8.4950024  | 8.35543043 | 8.63611336 | 8.28691995 |
| Ogn           | 0.21950223 | -0.2245187 | 0.00579398 | -0.0885217 | 7.34917028 | 7.45345781 | 7.3530724  | 7.36487056 | 7.56796729 | 7.22894316 |
| Prelp         | 0.12294417 | -0.3277017 | 0.0544473  | -0.1362137 | 8.39816175 | 8.50077478 | 8.45350326 | 8.36535998 | 8.52143349 | 8.17293199 |
| Reln          | 0.14123147 | -0.2556522 | -0.1338787 | -0.0846739 | 10.6569021 | 10.6959541 | 10.5223473 | 10.6130308 | 10.7981784 | 10.4407711 |
| Serpinf1      | 0.17639379 | -0.0973705 | 0.12151625 | 0.06156399 | 7.97677732 | 7.98134704 | 8.09818411 | 8.04308175 | 8.1533511  | 7.88447542 |
| Slc1a3        | -0.0506126 | -0.2791044 | -0.0636584 | -0.1854076 | 12.6956356 | 12.7280637 | 12.6313656 | 12.5419685 | 12.6447689 | 12.4481357 |
| Tgm2          | 0.13518367 | -0.0913342 | -0.0691249 | 0.04673249 | 7.98714543 | 7.94366064 | 7.91688814 | 7.99118453 | 8.12131822 | 7.85272549 |
| Wnt4          | 0.17876613 | -0.0788835 | 0.04648612 | -0.0337847 | 7.7148636  | 7.78208308 | 7.7613498  | 7.74879927 | 7.8942101  | 7.70323475 |

| cellular resp | sl/cl      | sr/cr      | rl/cl      | rr/cr      | cl         | cr         | rl         | rr         | sl         | sr         |
|---------------|------------|------------|------------|------------|------------|------------|------------|------------|------------|------------|
| Fos           | -0.2624533 | -0.455578  | -0.4137438 | -0.283863  | 10.0623312 | 9.97857408 | 9.64783855 | 9.69475951 | 9.80032217 | 9.52333992 |
| Fosb          | 0.28143187 | -0.1159542 | 0.09832603 | 0.01068175 | 8.28905709 | 8.36338796 | 8.38787577 | 8.37213876 | 8.57150972 | 8.24726027 |
| Junb          | 0.18004256 | -0.1798274 | 0.01917093 | 0.02973117 | 9.40098938 | 9.38523326 | 9.42808086 | 9.41736685 | 9.58202471 | 9.20586532 |
| Mef2c         | -0.0300646 | -0.1470211 | -0.1313618 | 0.01062349 | 12.3353297 | 12.1664706 | 12.2038497 | 12.177467  | 12.3054209 | 12.0195774 |
| Mt3           | 0.0532317  | -0.0195133 | 0.08144431 | -0.01045   | 10.4170777 | 10.3415544 | 10.4981682 | 10.3310949 | 10.4696196 | 10.3219908 |

| regulation | sl/cl      | sr/cr      | rl/cl      | rr/cr      | cl         | cr         | rl         | rr         | sl         | sr         |
|------------|------------|------------|------------|------------|------------|------------|------------|------------|------------|------------|
| Bdnf       | 0.12760208 | -0.1694664 | -0.0357513 | -0.0685744 | 8.66874524 | 8.67647392 | 8.63305174 | 8.60780939 | 8.79788667 | 8.50798419 |
| Camk2a     | 0.12882427 | -0.1567393 | -0.0339431 | -0.2757515 | 11.2437229 | 11.3286758 | 11.209452  | 11.0528715 | 11.3724021 | 11.1729444 |
| Egr2       | 0.1205971  | -0.2925413 | -0.2422923 | -0.0516785 | 8.42609713 | 8.34323047 | 8.18358463 | 8.29218916 | 8.54643106 | 8.05074068 |



|         |            |            |            |            |            |            |            |            |            |            |
|---------|------------|------------|------------|------------|------------|------------|------------|------------|------------|------------|
| Itpka   | 0.26070549 | -0.0256763 | 0.00884585 | -0.1581371 | 11.1199921 | 11.1890521 | 11.1286664 | 11.0297254 | 11.3800044 | 11.1622499 |
| Rasgrf1 | 0.11672462 | -0.1812076 | -0.0345787 | -0.1620232 | 12.398056  | 12.5613233 | 12.3635828 | 12.3992456 | 12.5152882 | 12.3800608 |
| Reln    | 0.14123147 | -0.2556522 | -0.1338787 | -0.0846739 | 10.6569021 | 10.6959541 | 10.5223473 | 10.6130308 | 10.7981784 | 10.4407711 |
| Vgf     | 0.13758889 | -0.3677197 | 0.00520092 | -0.2064293 | 11.7571927 | 11.9973946 | 11.7639741 | 11.7908362 | 11.8946736 | 11.6295875 |

| calcium-dep | sl/cl      | sr/cr      | rl/cl      | rr/cr      | cl         | cr         | rl         | rr         | sl         | sr         |
|-------------|------------|------------|------------|------------|------------|------------|------------|------------|------------|------------|
| Anxa11      | 0.14754893 | -0.2194118 | -0.0840244 | -0.2185909 | 9.59022805 | 9.71026    | 9.50681787 | 9.49206641 | 9.74007564 | 9.49202712 |
| Mgp         | 0.40483863 | -0.0911722 | 0.26417314 | -0.0223393 | 8.23126739 | 8.37753607 | 8.4950024  | 8.35543043 | 8.63611336 | 8.28691995 |
| S100a11     | 0.26329042 | -0.0659372 | 0.18417631 | 0.09258529 | 7.81770584 | 7.89292558 | 8.00167417 | 7.98643866 | 8.08096493 | 7.82677051 |
| S100a6      | 0.13499227 | -0.0234087 | 0.11044799 | -0.0541073 | 7.91541976 | 7.93286231 | 8.02615886 | 7.87877074 | 8.0515614  | 7.90949127 |
| Tnnc1       | 0.08188474 | -0.7882321 | -0.1829694 | -0.2306899 | 9.28487368 | 9.3788124  | 9.10180408 | 9.14995107 | 9.36871187 | 8.59068756 |
| Wfs1        | 0.45320352 | -0.4895689 | 0.23021222 | -0.1297208 | 8.85948358 | 8.97696769 | 9.08969445 | 8.8477454  | 9.31488397 | 8.48819898 |

| rhythmic pro | sl/cl      | sr/cr      | rl/cl      | rr/cr      | cl         | cr         | rl         | rr         | sl         | sr         |
|--------------|------------|------------|------------|------------|------------|------------|------------|------------|------------|------------|
| Adcyap1      | 0.09652559 | -0.2897159 | -0.068392  | -0.2877376 | 8.66575308 | 8.78223906 | 8.59374472 | 8.49353133 | 8.7610087  | 8.49227686 |
| Arntl        | 0.00140087 | -0.3659316 | -0.2515586 | -0.2367656 | 8.90413201 | 9.0422237  | 8.65415333 | 8.80469783 | 8.90799548 | 8.67591143 |
| Casp1        | 0.07762033 | -0.1220736 | -0.1004216 | -0.0740955 | 7.78369877 | 7.7706169  | 7.68340443 | 7.69609256 | 7.86155825 | 7.64740887 |
| Dbp          | 0.05722823 | -0.0895153 | 0.01755925 | 0.1417314  | 11.1938134 | 11.0715951 | 11.2106771 | 11.2134315 | 11.2490945 | 10.9833418 |
| Egr2         | 0.1205971  | -0.2925413 | -0.2422923 | -0.0516785 | 8.42609713 | 8.34323047 | 8.18358463 | 8.29218916 | 8.54643106 | 8.05074068 |
| Nr2f6        | 0.28849364 | -0.0933661 | 0.22953673 | 0.03265728 | 8.57882937 | 8.70113769 | 8.80782207 | 8.73311686 | 8.86644464 | 8.60721369 |
| Per1         | 0.09723122 | -0.2265054 | -0.0931869 | 0.00468232 | 9.50895917 | 9.55710719 | 9.41464555 | 9.56167939 | 9.60417626 | 9.3302759  |
| Per2         | 0.20516066 | -0.0965107 | 0.14376313 | 0.22634882 | 9.88853196 | 9.91288898 | 10.0293073 | 10.138607  | 10.0905698 | 9.81561375 |
| Prkg2        | 0.18333267 | -0.0981914 | 0.19671833 | 0.0834756  | 7.94434734 | 7.96768602 | 8.14183608 | 8.05161357 | 8.12919738 | 7.8700331  |
| Schip1       | 0.06648906 | -0.2007781 | 0.00548063 | -0.0263123 | 11.6485113 | 11.7078905 | 11.6536944 | 11.678871  | 11.7146621 | 11.5048699 |
| Vgf          | 0.13758889 | -0.3677197 | 0.00520092 | -0.2064293 | 11.7571927 | 11.9973946 | 11.7639741 | 11.7908362 | 11.8946736 | 11.6295875 |

| learning or | nsl/cl     | sr/cr      | rl/cl      | rr/cr      | cl         | cr         | rl         | rr         | sl         | sr         |
|-------------|------------|------------|------------|------------|------------|------------|------------|------------|------------|------------|
| Bdnf        | 0.12760208 | -0.1694664 | -0.0357513 | -0.0685744 | 8.66874524 | 8.67647392 | 8.63305174 | 8.60780939 | 8.79788667 | 8.50798419 |
| Casp1       | 0.07762033 | -0.1220736 | -0.1004216 | -0.0740955 | 7.78369877 | 7.7706169  | 7.68340443 | 7.69609256 | 7.86155825 | 7.64740887 |

|          |            |            |            |            |            |            |            |            |            |            |
|----------|------------|------------|------------|------------|------------|------------|------------|------------|------------|------------|
| Igf2     | 0.3954169  | -0.3239219 | 0.24960236 | -0.0437366 | 9.35187174 | 9.55812134 | 9.60086189 | 9.51780487 | 9.74699395 | 9.23515832 |
| Mef2c    | -0.0300646 | -0.1470211 | -0.1313618 | 0.01062349 | 12.3353297 | 12.1664706 | 12.2038497 | 12.177467  | 12.3054209 | 12.0195774 |
| Pde4d    | 0.10786678 | -0.0744097 | 0.05068213 | -0.0344082 | 7.53192062 | 7.55779704 | 7.58317474 | 7.52384994 | 7.63971659 | 7.48450477 |
| Reln     | 0.14123147 | -0.2556522 | -0.1338787 | -0.0846739 | 10.6569021 | 10.6959541 | 10.5223473 | 10.6130308 | 10.7981784 | 10.4407711 |
| Serpinf1 | 0.17639379 | -0.0973705 | 0.12151625 | 0.06156399 | 7.97677732 | 7.98134704 | 8.09818411 | 8.04308175 | 8.1533511  | 7.88447542 |
| Vip      | 0.20402177 | -0.3278889 | -0.0709145 | -0.0893611 | 10.5107037 | 10.5211764 | 10.4403917 | 10.4295802 | 10.7158088 | 10.1904719 |

| S100 protein | sl/cl      | sr/cr      | rl/cl      | rr/cr      | cl         | cr         | rl         | rr         | sl         | sr         |
|--------------|------------|------------|------------|------------|------------|------------|------------|------------|------------|------------|
| Anxa11       | 0.14754893 | -0.2194118 | -0.0840244 | -0.2185909 | 9.59022805 | 9.71026    | 9.50681787 | 9.49206641 | 9.74007564 | 9.49202712 |
| Anxa2        | 0.28829742 | -0.0014408 | 0.18054056 | 0.16720577 | 8.11126032 | 8.1842222  | 8.29169149 | 8.35152042 | 8.39976386 | 8.18282751 |
| S100a11      | 0.26329042 | -0.0659372 | 0.18417631 | 0.09258529 | 7.81770584 | 7.89292558 | 8.00167417 | 7.98643866 | 8.08096493 | 7.82677051 |
| S100a6       | 0.13499227 | -0.0234087 | 0.11044799 | -0.0541073 | 7.91541976 | 7.93286231 | 8.02615886 | 7.87877074 | 8.0515614  | 7.90949127 |

| response to | sl/cl      | sr/cr      | rl/cl      | rr/cr      | cl         | cr         | rl         | rr         | sl         | sr         |
|-------------|------------|------------|------------|------------|------------|------------|------------|------------|------------|------------|
| Anxa11      | 0.14754893 | -0.2194118 | -0.0840244 | -0.2185909 | 9.59022805 | 9.71026    | 9.50681787 | 9.49206641 | 9.74007564 | 9.49202712 |
| Fos         | -0.2624533 | -0.455578  | -0.4137438 | -0.283863  | 10.0623312 | 9.97857408 | 9.64783855 | 9.69475951 | 9.80032217 | 9.52333992 |
| Fosb        | 0.28143187 | -0.1159542 | 0.09832603 | 0.01068175 | 8.28905709 | 8.36338796 | 8.38787577 | 8.37213876 | 8.57150972 | 8.24726027 |
| Junb        | 0.18004256 | -0.1798274 | 0.01917093 | 0.02973117 | 9.40098938 | 9.38523326 | 9.42808086 | 9.41736685 | 9.58202471 | 9.20586532 |
| Mef2c       | -0.0300646 | -0.1470211 | -0.1313618 | 0.01062349 | 12.3353297 | 12.1664706 | 12.2038497 | 12.177467  | 12.3054209 | 12.0195774 |
| Mt3         | 0.0532317  | -0.0195133 | 0.08144431 | -0.01045   | 10.4170777 | 10.3415544 | 10.4981682 | 10.3310949 | 10.4696196 | 10.3219908 |
| Tnnc1       | 0.08188474 | -0.7882321 | -0.1829694 | -0.2306899 | 9.28487368 | 9.3788124  | 9.10180408 | 9.14995107 | 9.36871187 | 8.59068756 |

| cognition | sl/cl      | sr/cr      | rl/cl      | rr/cr      | cl         | cr         | rl         | rr         | sl         | sr         |
|-----------|------------|------------|------------|------------|------------|------------|------------|------------|------------|------------|
| Bdnf      | 0.12760208 | -0.1694664 | -0.0357513 | -0.0685744 | 8.66874524 | 8.67647392 | 8.63305174 | 8.60780939 | 8.79788667 | 8.50798419 |
| Casp1     | 0.07762033 | -0.1220736 | -0.1004216 | -0.0740955 | 7.78369877 | 7.7706169  | 7.68340443 | 7.69609256 | 7.86155825 | 7.64740887 |
| Igf2      | 0.3954169  | -0.3239219 | 0.24960236 | -0.0437366 | 9.35187174 | 9.55812134 | 9.60086189 | 9.51780487 | 9.74699395 | 9.23515832 |
| Mef2c     | -0.0300646 | -0.1470211 | -0.1313618 | 0.01062349 | 12.3353297 | 12.1664706 | 12.2038497 | 12.177467  | 12.3054209 | 12.0195774 |
| Pde4d     | 0.10786678 | -0.0744097 | 0.05068213 | -0.0344082 | 7.53192062 | 7.55779704 | 7.58317474 | 7.52384994 | 7.63971659 | 7.48450477 |
| Reln      | 0.14123147 | -0.2556522 | -0.1338787 | -0.0846739 | 10.6569021 | 10.6959541 | 10.5223473 | 10.6130308 | 10.7981784 | 10.4407711 |

|          |            |            |            |            |            |            |            |            |            |            |
|----------|------------|------------|------------|------------|------------|------------|------------|------------|------------|------------|
| Serpinf1 | 0.17639379 | -0.0973705 | 0.12151625 | 0.06156399 | 7.97677732 | 7.98134704 | 8.09818411 | 8.04308175 | 8.1533511  | 7.88447542 |
| Vip      | 0.20402177 | -0.3278889 | -0.0709145 | -0.0893611 | 10.5107037 | 10.5211764 | 10.4403917 | 10.4295802 | 10.7158088 | 10.1904719 |
