# Supplementary material for: Molecular laterality encodes stress susceptibility in the medial prefrontal cortex
Source: PubMed Central journal article supplement (PMC8201740; doi:10.1186/s13041-021-00802-w), 2021-06-14
Supplement: 13041_2021_802_MOESM9_ESM.pdf [file 13041_2021_802_MOESM9_ESM.pdf]

**Supplementary Table 7. Summary of statistics**

| Figure    | Test                                                 | Comparison                                   | Sample number                               | Stat                                                                                                                                        | p-value           | Summary |
|-----------|------------------------------------------------------|----------------------------------------------|---------------------------------------------|---------------------------------------------------------------------------------------------------------------------------------------------|-------------------|---------|
| Figure 2a | independent samples t-test                           | susceptible left vs. susceptible right       | n = 9                                       | $t_{16} = -8.324$                                                                                                                           | $p = 0.000000330$ | **      |
| Figure 2b | independent samples t-test                           | susceptible left vs. susceptible right       | n = 8                                       | $t_{14} = -7.235$                                                                                                                           | $p = 0.00000432$  | **      |
| Figure 2c | independent samples t-test                           | susceptible left vs. susceptible right       | n = 9                                       | $t_{16} = -6.756$                                                                                                                           | $p = 0.00000462$  | **      |
| Figure 2d | independent samples t-test                           | susceptible left vs. susceptible right       | n = 7                                       | $t_{12} = -6.114$                                                                                                                           | $p = 0.0000522$   | **      |
| Figure 2e | independent samples t-test                           | susceptible left vs. susceptible right       | n = 5                                       | $t_8 = 8.665$                                                                                                                               | $p = 0.0000245$   | **      |
| Figure 2f | independent samples t-test                           | susceptible left vs. susceptible right       | n = 8                                       | $t_{14} = 6.096$                                                                                                                            | $p = 0.0000276$   | **      |
| Figure 2g | independent samples t-test                           | susceptible left vs. susceptible right       | n = 7                                       | $t_{12} = 2.844$                                                                                                                            | $p = 0.0148$      | *       |
| Figure 2h | independent samples t-test                           | susceptible left vs. susceptible right       | n = 12                                      | $t_{22} = 8.454$                                                                                                                            | $p = 0.000000023$ | **      |
| Figure 3a | Kruskal-Wallis One Way Analysis of Variance on Ranks | control vs. resilient vs. susceptible        | control = 5, resilient = 5, susceptible = 5 | $H = 9.620, df = 2$                                                                                                                         | $p = 0.008$       | **      |
|           | Turkey test post-hoc                                 |                                              |                                             | between control and susceptible, $*p < 0.05$ , between control and resilient, $p > 0.05$ . between resilient and susceptible, $*p < 0.05$ , |                   |         |
| Figure 3b | two-way ANOVA                                        | Group: control vs. resilient vs. susceptible | control = 8, resilient = 7, susceptible = 7 | $F(2, 38) = 14.445$                                                                                                                         | $p < 0.001$       | **      |
|           |                                                      | Laterality : Left vs. Right                  |                                             | $F(1, 38) = 3.634$                                                                                                                          | $p = 0.064$       | NS      |
|           |                                                      | Group X Laterality                           |                                             | $F(2, 38) = 4.489$                                                                                                                          | $p = 0.018$       | *       |

|           |                              |                                      |                               |                                                                                                                                                                                                                                                                                                                                                                                 |              |    |
|-----------|------------------------------|--------------------------------------|-------------------------------|---------------------------------------------------------------------------------------------------------------------------------------------------------------------------------------------------------------------------------------------------------------------------------------------------------------------------------------------------------------------------------|--------------|----|
|           |                              |                                      |                               | laterality within susceptible ** $p = 0.002$ , laterality within resilient $p = 0.357$ ; within left mPFC, control and resilient, ** $p < 0.001$ , control and susceptible, $p = 0.120$ , resilient and susceptible, * $p = 0.016$ ; within right mPFC, control and resilient, * $p = 0.025$ , control and susceptible, ** $p < 0.001$ , resilient and susceptible, $p = 0.166$ |              |    |
|           | Holm-sidak post-hoc analysis |                                      |                               |                                                                                                                                                                                                                                                                                                                                                                                 |              |    |
| Figure 3d | independent samples t-test   | scramble shRNA vs. CTGF shRNA        | scrambled = 3, CTGF shRNA = 3 | $t_4 = 2.850$                                                                                                                                                                                                                                                                                                                                                                   | $p = 0.0464$ | *  |
| Figure 3e | two-way RM ANOVA             | Group: non-stress vs. stress         | non-stress = 14, stress = 16  | $F(1, 28) = 1.731$                                                                                                                                                                                                                                                                                                                                                              | $p = 0.199$  | NS |
|           |                              | Repeated trial: No Target vs. Target |                               | $F(1, 28) = 7.721$                                                                                                                                                                                                                                                                                                                                                              | $p = 0.010$  | *  |
|           |                              | Stress X Target interaction          |                               | $F(1, 28) = 5.126$                                                                                                                                                                                                                                                                                                                                                              | $p = 0.032$  | *  |
|           | Holm-sidak post-hoc analysis |                                      |                               |                                                                                                                                                                                                                                                                                                                                                                                 |              |    |
|           |                              |                                      |                               |                                                                                                                                                                                                                                                                                                                                                                                 |              |    |
| Figure 3f | two-way RM ANOVA             | Group: non-stress vs. stress         | non-stress = 13, stress = 17  | $F(1, 28) = 2.514$                                                                                                                                                                                                                                                                                                                                                              | $p = 0.124$  | NS |
|           |                              | Repeated trial: No Target vs. Target |                               | $F(1, 28) = 20.319$                                                                                                                                                                                                                                                                                                                                                             | $p < 0.001$  | ** |
|           |                              | Stress X Target interaction          |                               | $F(1, 28) = 4.478$                                                                                                                                                                                                                                                                                                                                                              | $p = 0.043$  | *  |

|                 |                                                     |                                      |                              |                                                                                                                                                                                                            |             |    |
|-----------------|-----------------------------------------------------|--------------------------------------|------------------------------|------------------------------------------------------------------------------------------------------------------------------------------------------------------------------------------------------------|-------------|----|
|                 |                                                     |                                      |                              | within non-stressed, effect of target, ** $p < 0.001$ ; within stressed, effect of target, $p = 0.080$ ; within non-target, effect of stress, $p = 0.949$ , within target, effect of stress, * $p = 0.014$ |             |    |
| Figure 3g       | two-way RM ANOVA                                    | Group: non-stress vs. stress         | non-stress = 11, stress = 15 | $F(1, 24) = 1.968$                                                                                                                                                                                         | $p = 0.173$ | NS |
|                 |                                                     | Repeated trial: No Target vs. Target |                              | $F(1, 24) = 58.986$                                                                                                                                                                                        | $p < 0.001$ | ** |
|                 |                                                     | Stress X Target interaction          |                              | $F(1, 24) = 2.480$                                                                                                                                                                                         | $p = 0.128$ | NS |
|                 | Holm-sidak post-hoc analysis for main target effect |                                      |                              | within non-stressed, effect of target, ** $p < 0.001$ ; within stressed, effect of target, ** $p < 0.001$                                                                                                  |             |    |
| Figure 4c left  | two-way RM ANOVA                                    | Group: non-stress vs. stress         | non-stress = 8, stress = 11  | $F(1, 17) = 4.008$                                                                                                                                                                                         | $p = 0.061$ | NS |
|                 |                                                     | Repeated trial: No Target vs. Target |                              | $F(1, 17) = 0.00147$                                                                                                                                                                                       | $p = 0.970$ | NS |
|                 |                                                     | Stress X Target interaction          |                              | $F(1, 17) = 17.763$                                                                                                                                                                                        | $p < 0.001$ | ** |
|                 | Holm-sidak post-hoc analysis                        |                                      |                              | within non-stress, effect of target, * $p = 0.012$ , within stress the effect of target, ** $p = 0.005$ , within target presence, effect of stress, ** $p < 0.001$                                         |             |    |
| Figure 4c right | two-way RM ANOVA                                    | Group: non-stress vs. stress         | non-stress = 10, stress = 11 | $F(1, 19) = 3.371$                                                                                                                                                                                         | $p = 0.082$ | NS |
|                 |                                                     | Repeated trial: No Target vs. Target |                              | $F(1, 19) = 18.637$                                                                                                                                                                                        | $p < 0.001$ | ** |
|                 |                                                     | Stress X Target interaction          |                              | $F(1, 19) = 3.965$                                                                                                                                                                                         | $p = 0.061$ | NS |
|                 | Holm-sidak post-hoc analysis for main target effect |                                      |                              | within non-stressed, effect of target $p = 0.125$ , within stressed, effect of target, ** $p < 0.001$                                                                                                      |             |    |
| Figure 4d left  | two-way RM ANOVA                                    | Group: control vs. R-CTGF            | control = 8, R-CTGF = 10     | $F(1, 16) = 1.266$                                                                                                                                                                                         | $p = 0.277$ | NS |
|                 |                                                     | Repeated trial: No Target vs. Target |                              | $F(1, 16) = 0.143$                                                                                                                                                                                         | $p = 0.710$ | NS |

|                 |                                                     |                                      |                              |                                                                                                                                                                         |               |    |
|-----------------|-----------------------------------------------------|--------------------------------------|------------------------------|-------------------------------------------------------------------------------------------------------------------------------------------------------------------------|---------------|----|
|                 |                                                     | Stress X Target interaction          |                              | $F(1, 16) = 8.921$                                                                                                                                                      | $p = 0.009$   | ** |
|                 | Holm-sidak post-hoc analysis                        |                                      |                              | within control, effect of target, $*p = 0.038$ , within R-CTGF, effect of target, $p = 0.068$ , within target presence, the effect of R-CTGF, $*p = 0.025$              |               |    |
| Figure 4d right | independent samples t-test                          | Control vs. R-CTGF                   | control = 8, R-CTGF = 10     | $t_{16} = 3.020$                                                                                                                                                        | $p = 0.00814$ | ** |
| Figure 4e left  | Mann-Whitney Rank Sum Test                          | Control vs. R-CTGF                   | control = 5, R-CTGF = 9      | $T = 54$                                                                                                                                                                | $p = 0.033$   | *  |
| Figure 4e right | independent samples t-test                          | Control vs. R-CTGF                   | control = 5, R-CTGF = 9      | $t_{12} = -2.547$                                                                                                                                                       | $p = 0.0256$  | *  |
| Figure 5b       | independent samples t-test                          | Control vs. L-CTGF                   | control = 4, L-CTGF = 4      | $t_6 = -6.142$                                                                                                                                                          | $p < 0.01$    | ** |
| Figure 5c left  | two-way RM ANOVA                                    | Group: non-stress vs. stress         | non-stress = 13, stress = 21 | $F(1, 32) = 2.517$                                                                                                                                                      | $p = 0.122$   | NS |
|                 |                                                     | Repeated trial: No Target vs. Target |                              | $F(1, 32) = 29.886$                                                                                                                                                     | $p < 0.001$   | ** |
|                 |                                                     | Stress X Target interaction          |                              | $F(1, 32) = 9.537$                                                                                                                                                      | $p = 0.004$   | ** |
|                 | Holm-sidak post-hoc analysis                        |                                      |                              | within non-stressed, the effect of target, $**p < 0.001$ ; within stressed, the effect of target, $p = 0.063$ ; within target presence, effect of stress, $**p = 0.004$ |               |    |
| Figure 5c right | two-way RM ANOVA                                    | Group: non-stress vs. stress         | non-stress = 14, stress = 15 | $F(1, 27) = 0.0540$                                                                                                                                                     | $p = 0.818$   | NS |
|                 |                                                     | Repeated trial: No Target vs. Target |                              | $F(1, 27) = 20.560$                                                                                                                                                     | $p < 0.001$   | ** |
|                 |                                                     | Stress X Target interaction          |                              | $F(1, 27) = 1.293$                                                                                                                                                      | $p = 0.266$   | NS |
|                 | Holm-sidak post-hoc analysis for main target effect |                                      |                              | within L-CTGF non-stressed, the effect of target, $**p < 0.001$ ; within L-CTGF stressed, the effect of target, $*p = 0.021$                                            |               |    |
| Figure 5d left  | independent samples t-test                          | Control vs. L-CTGF                   | control = 6, L-CTGF = 8      | $t_{12} = 1.728$                                                                                                                                                        | $p = 0.110$   | NS |
| Figure 5d right | independent samples t-test                          | Control vs. L-CTGF                   | control = 6, L-CTGF = 8      | $t_{12} = 0.315$                                                                                                                                                        | $p = 0.758$   | NS |
